# Supplementary material for: Habitat composition near linear landscape structures across Poland: perspectives on pollinator conservation
Source: PeerJ journal article supplement (doi:10.7717/peerj.19765), 2025-07-31

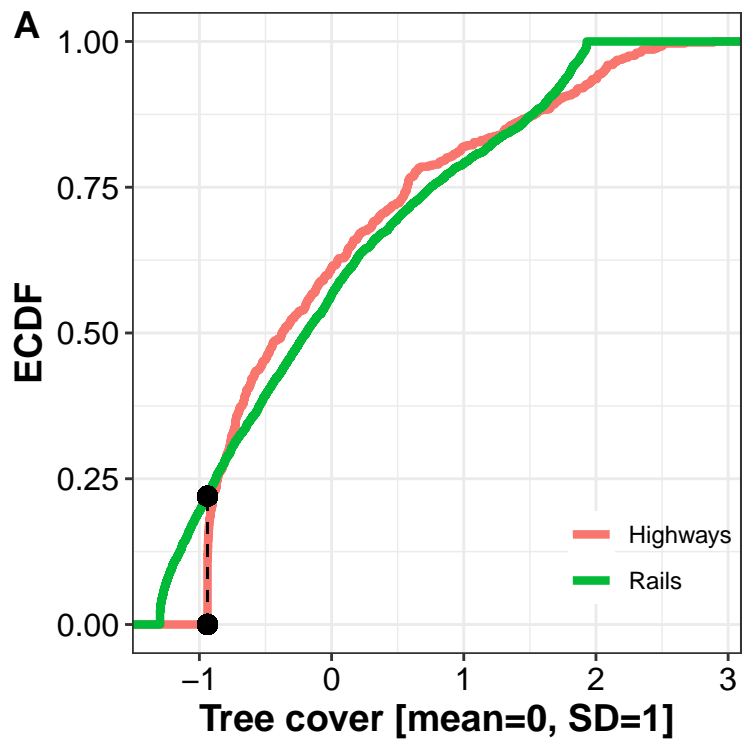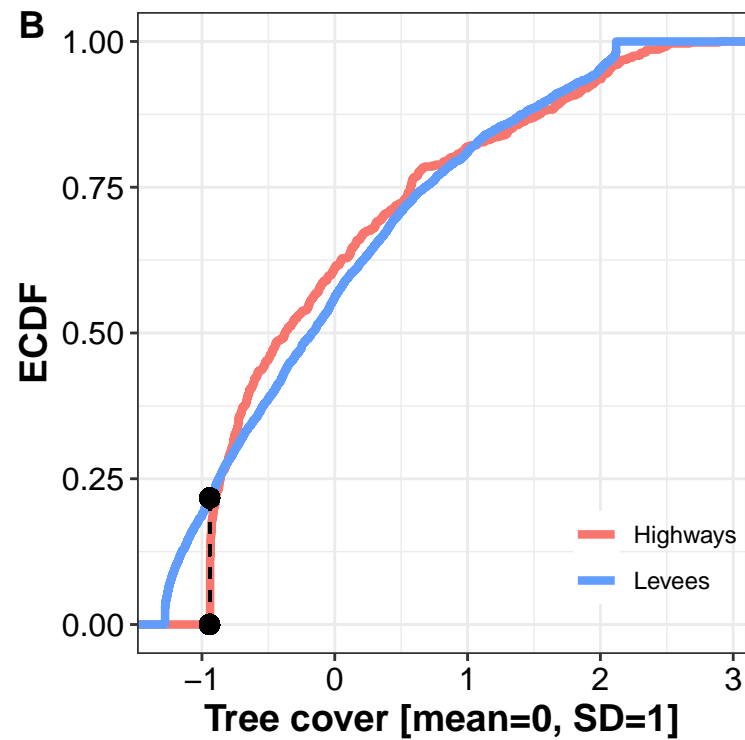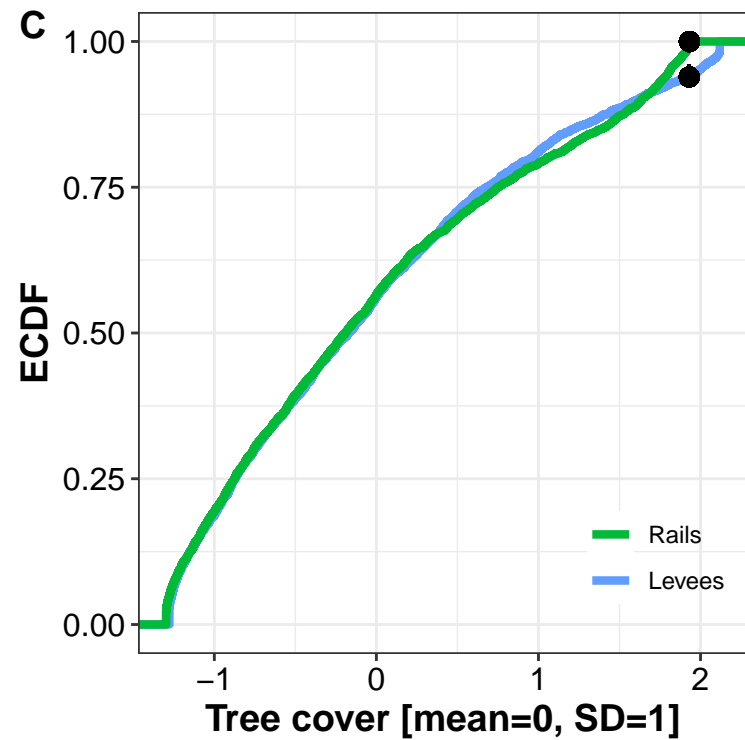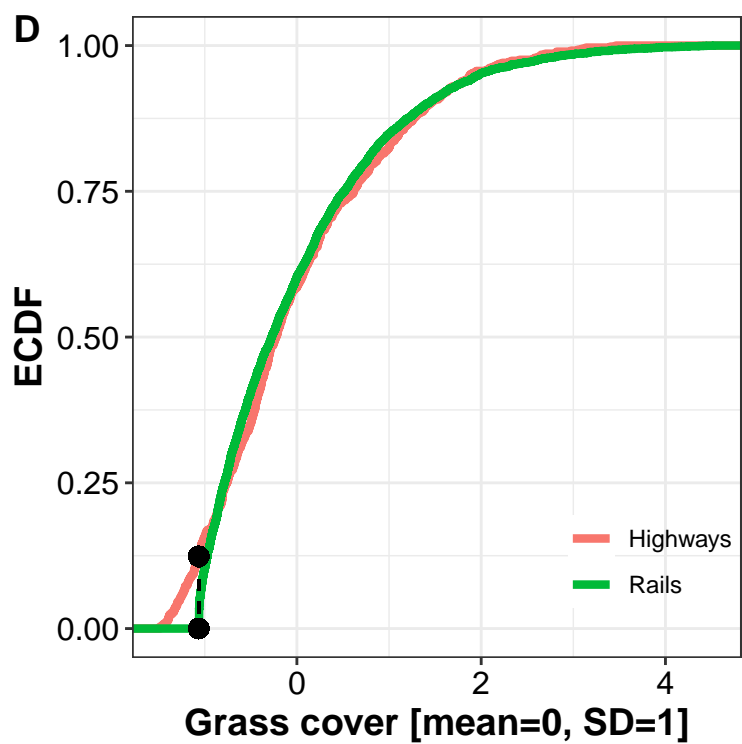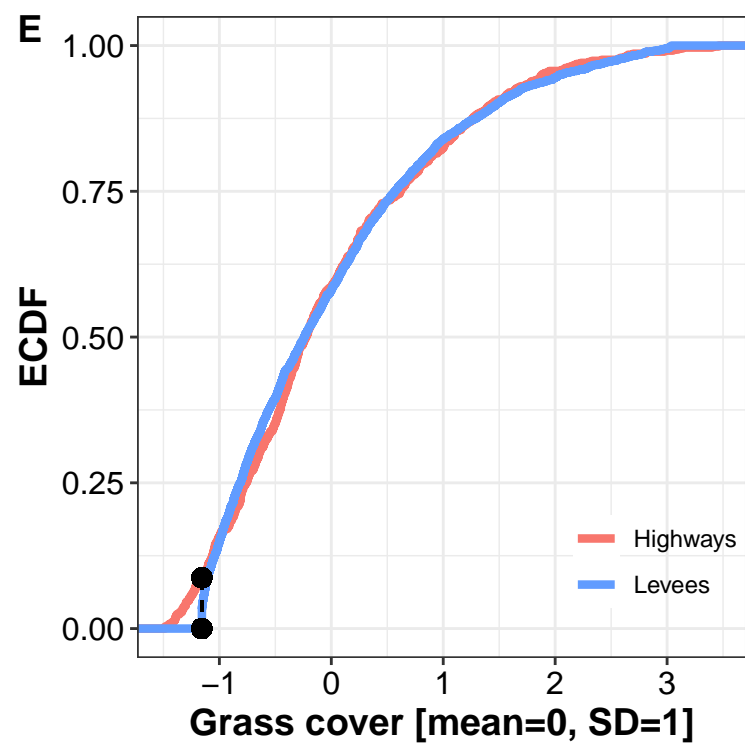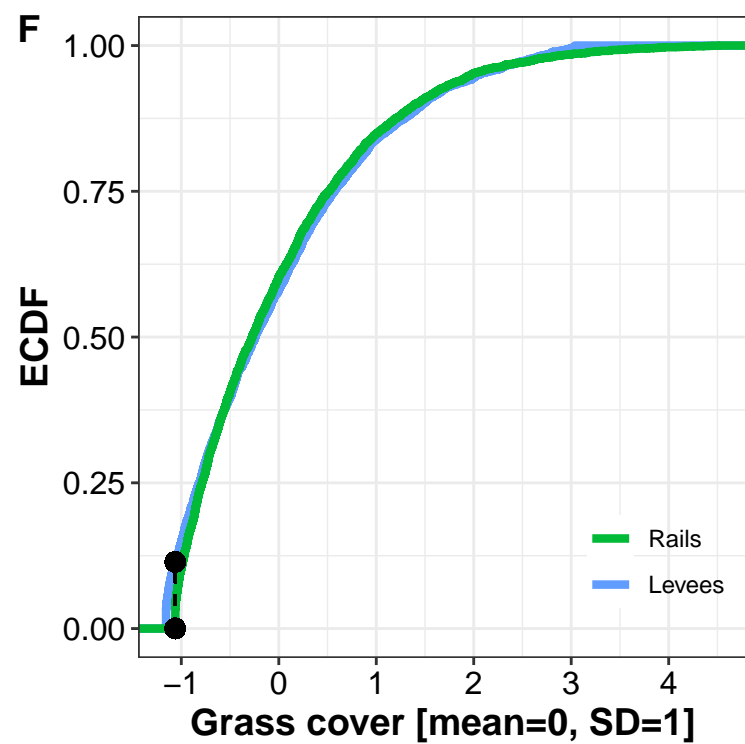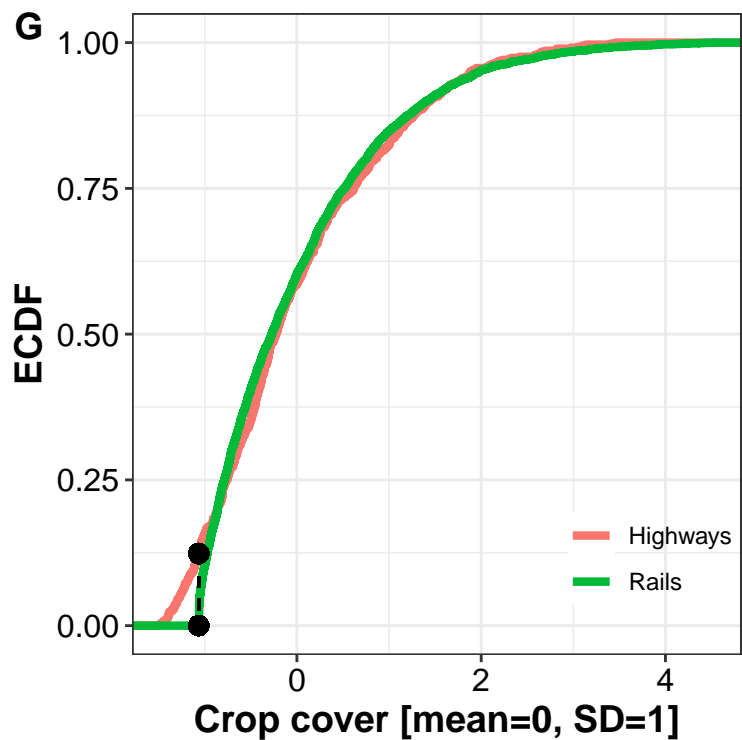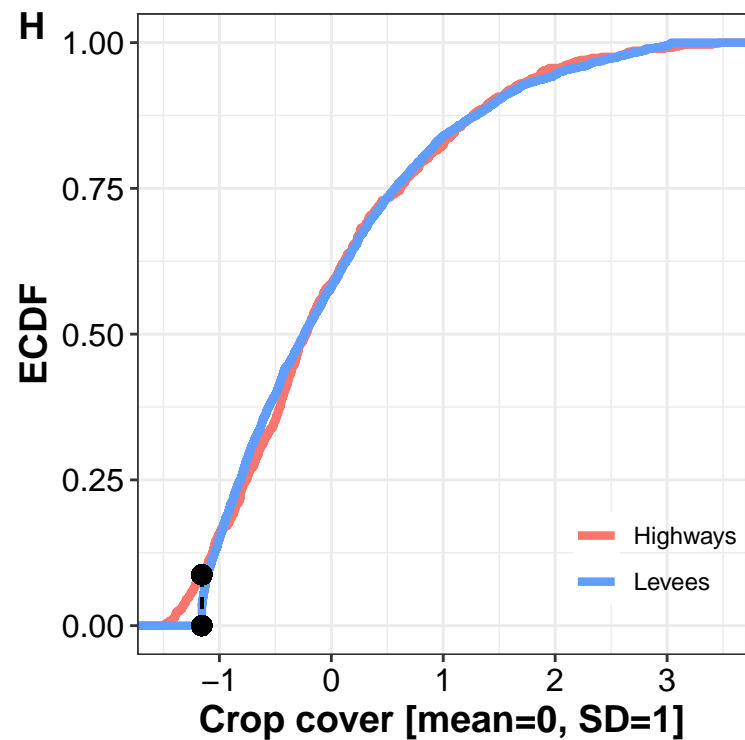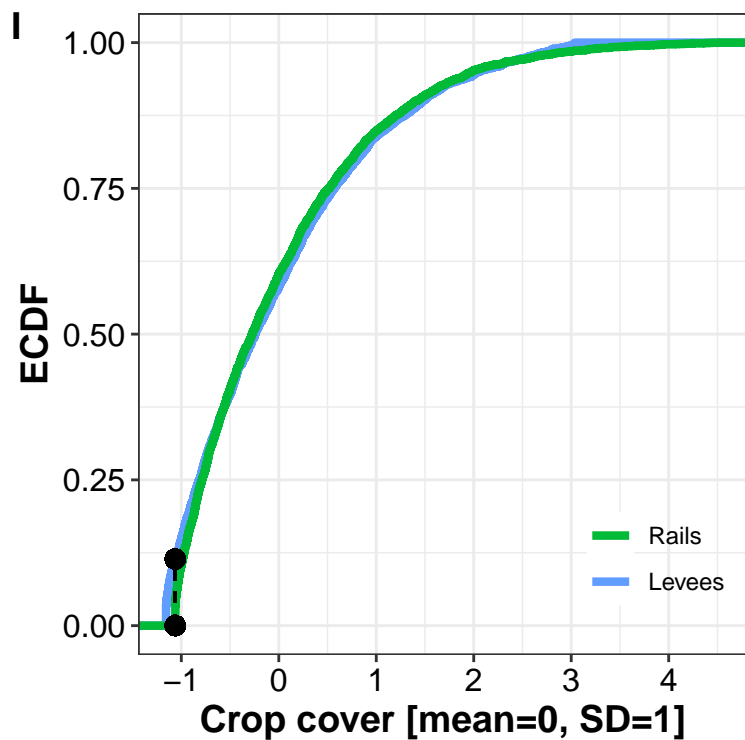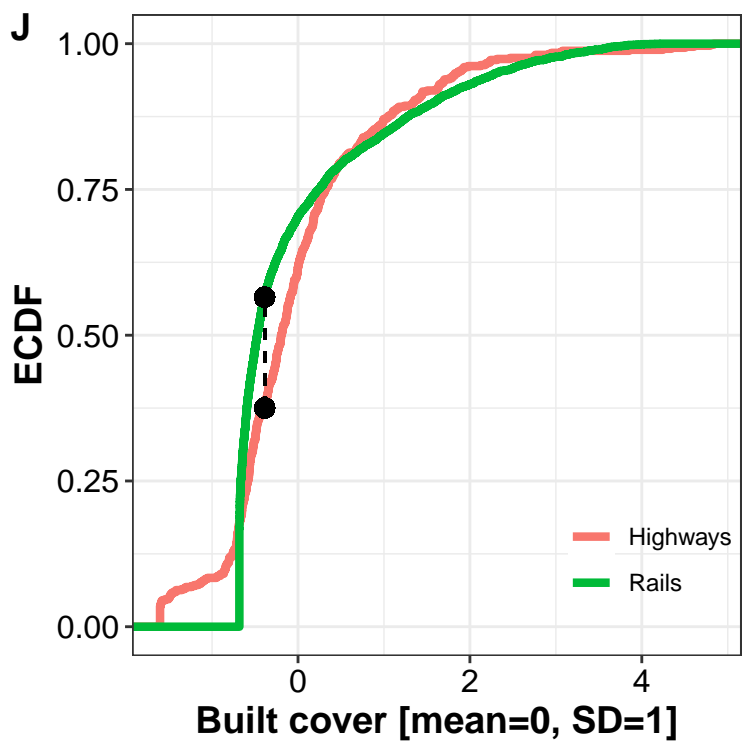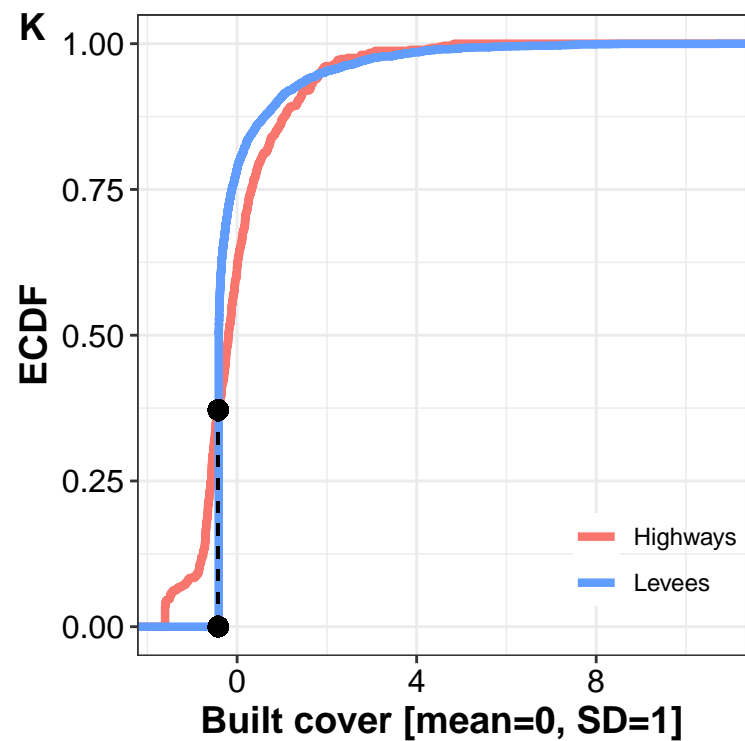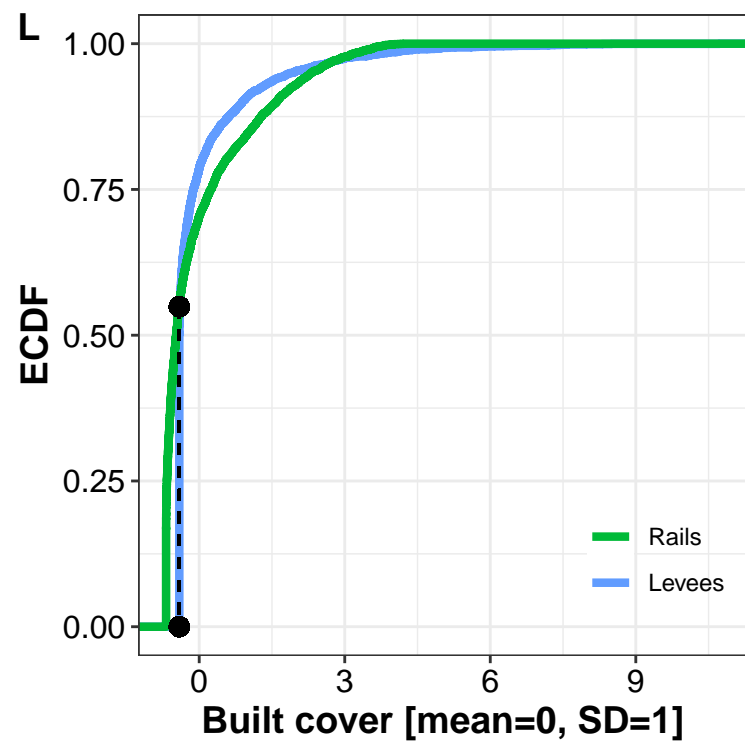

Supplement: Supplement_1.pdf [file Supplement_1.pdf]
