# Supplementary material for: Habitat composition near linear landscape structures across Poland: perspectives on pollinator conservation
Source: PeerJ. 2025 Jul 31;13:e19765. doi: 10.7717/peerj.19765 (PMC12318509; doi:10.7717/peerj.19765)
Supplement: Supplemental Information 2 — Land cover within buffers of 250, 500, and 1,000 m around linear landscape structures (highways, railways, and levees) across Poland. Each row indicates a sampling point with percentage of land cover, type of linear landscape structure, and scale. [file peerj-13-19765-s002.xlsx]

## Sheet: voivodeship_level
voivodeship	cover	land	lls_scale	lls	scale
zachpom	0.452113	tree	control	control	control
pom	0.414136	tree	control	control	control
podl	0.393758	tree	control	control	control
warm	0.408792	tree	control	control	control
maz	0.375911	tree	control	control	control
kujaw	0.312508	tree	control	control	control
wielko	0.324731	tree	control	control	control
lubu	0.565567	tree	control	control	control
dolno	0.402363	tree	control	control	control
slas	0.496875	tree	control	control	control
opol	0.331839	tree	control	control	control
swiet	0.436553	tree	control	control	control
malo	0.500003	tree	control	control	control
podk	0.544161	tree	control	control	control
lodz	0.335658	tree	control	control	control
lubel	0.336424	tree	control	control	control
zachpom	0.176567	grass	control	control	control
pom	0.156917	grass	control	control	control
podl	0.271867	grass	control	control	control
warm	0.243412	grass	control	control	control
maz	0.251428	grass	control	control	control
kujaw	0.123385	grass	control	control	control
wielko	0.153519	grass	control	control	control
lubu	0.179552	grass	control	control	control
dolno	0.157754	grass	control	control	control
slas	0.187762	grass	control	control	control
opol	0.102746	grass	control	control	control
swiet	0.223605	grass	control	control	control
malo	0.201674	grass	control	control	control
podk	0.186974	grass	control	control	control
lodz	0.199053	grass	control	control	control
lubel	0.173606	grass	control	control	control
zachpom	0.298861	crop	control	control	control
pom	0.302706	crop	control	control	control
podl	0.297328	crop	control	control	control
warm	0.279165	crop	control	control	control
maz	0.32949	crop	control	control	control
kujaw	0.510991	crop	control	control	control
wielko	0.471904	crop	control	control	control
lubu	0.218449	crop	control	control	control
dolno	0.396035	crop	control	control	control
slas	0.230915	crop	control	control	control
opol	0.524221	crop	control	control	control
swiet	0.302564	crop	control	control	control
malo	0.246621	crop	control	control	control
podk	0.233699	crop	control	control	control
lodz	0.421754	crop	control	control	control
lubel	0.457512	crop	control	control	control
zachpom	0.0151812	built	control	control	control
pom	0.0244135	built	control	control	control
podl	0.0182954	built	control	control	control
warm	0.0130724	built	control	control	control
maz	0.0323254	built	control	control	control
kujaw	0.0272432	built	control	control	control
wielko	0.033989	built	control	control	control
lubu	0.0186251	built	control	control	control
dolno	0.0308298	built	control	control	control
slas	0.0668172	built	control	control	control
opol	0.0282124	built	control	control	control
swiet	0.0286842	built	control	control	control
malo	0.0397004	built	control	control	control
podk	0.0268734	built	control	control	control
lodz	0.0339932	built	control	control	control
lubel	0.021362	built	control	control	control
zachpom	0.00083713	bare	control	control	control
pom	0.00171169	bare	control	control	control
podl	0.000904372	bare	control	control	control
warm	0.000746855	bare	control	control	control
maz	0.000836291	bare	control	control	control
kujaw	0.000632926	bare	control	control	control
wielko	0.000906259	bare	control	control	control
lubu	0.000489117	bare	control	control	control
dolno	0.00256621	bare	control	control	control
slas	0.00204634	bare	control	control	control
opol	0.000853116	bare	control	control	control
swiet	0.00147328	bare	control	control	control
malo	0.00144664	bare	control	control	control
podk	0.000455774	bare	control	control	control
lodz	0.00217084	bare	control	control	control
lubel	0.000408225	bare	control	control	control
zachpom	0.0473083	water	control	control	control
pom	0.0964643	water	control	control	control
podl	0.00910609	water	control	control	control
warm	0.0488857	water	control	control	control
maz	0.00798517	water	control	control	control
kujaw	0.0222568	water	control	control	control
wielko	0.0130473	water	control	control	control
lubu	0.0145698	water	control	control	control
dolno	0.00834436	water	control	control	control
slas	0.0144315	water	control	control	control
opol	0.0109582	water	control	control	control
swiet	0.00552409	water	control	control	control
malo	0.00978051	water	control	control	control
podk	0.00718716	water	control	control	control
lodz	0.00555187	water	control	control	control
lubel	0.00616146	water	control	control	control
zachpom	0.00913103	wetland	control	control	control
pom	0.00365107	wetland	control	control	control
podl	0.00873926	wetland	control	control	control
warm	0.00592571	wetland	control	control	control
maz	0.00202435	wetland	control	control	control
kujaw	0.00298345	wetland	control	control	control
wielko	0.00190407	wetland	control	control	control
lubu	0.00274809	wetland	control	control	control
dolno	0.00210757	wetland	control	control	control
slas	0.00115265	wetland	control	control	control
opol	0.00117053	wetland	control	control	control
swiet	0.00159626	wetland	control	control	control
malo	0.000449911	wetland	control	control	control
podk	0.000649125	wetland	control	control	control
lodz	0.00181862	wetland	control	control	control
lubel	0.00451962	wetland	control	control	control
dolno	0.212161	tree	highway_250	highway	s250
kujaw	0.224522	tree	highway_250	highway	s250
lubel	0.19374	tree	highway_250	highway	s250
lubu	0.459163	tree	highway_250	highway	s250
lodz	0.227398	tree	highway_250	highway	s250
malo	0.372305	tree	highway_250	highway	s250
maz	0.282694	tree	highway_250	highway	s250
opol	0.301884	tree	highway_250	highway	s250
podk	0.196309	tree	highway_250	highway	s250
podl	0.148787	tree	highway_250	highway	s250
pom	0.210893	tree	highway_250	highway	s250
slas	0.385169	tree	highway_250	highway	s250
swiet	0.347068	tree	highway_250	highway	s250
warm	0.273279	tree	highway_250	highway	s250
wielko	0.187458	tree	highway_250	highway	s250
zachpom	0.287929	tree	highway_250	highway	s250
dolno	0.190819	grass	highway_250	highway	s250
kujaw	0.194569	grass	highway_250	highway	s250
lubel	0.213418	grass	highway_250	highway	s250
lubu	0.212553	grass	highway_250	highway	s250
lodz	0.284734	grass	highway_250	highway	s250
malo	0.280618	grass	highway_250	highway	s250
maz	0.285949	grass	highway_250	highway	s250
opol	0.143155	grass	highway_250	highway	s250
podk	0.334868	grass	highway_250	highway	s250
podl	0.324983	grass	highway_250	highway	s250
pom	0.215162	grass	highway_250	highway	s250
slas	0.247235	grass	highway_250	highway	s250
swiet	0.270631	grass	highway_250	highway	s250
warm	0.275236	grass	highway_250	highway	s250
wielko	0.240441	grass	highway_250	highway	s250
zachpom	0.246159	grass	highway_250	highway	s250
dolno	0.473118	crop	highway_250	highway	s250
kujaw	0.431938	crop	highway_250	highway	s250
lubel	0.434912	crop	highway_250	highway	s250
lubu	0.213875	crop	highway_250	highway	s250
lodz	0.344735	crop	highway_250	highway	s250
malo	0.188659	crop	highway_250	highway	s250
maz	0.232826	crop	highway_250	highway	s250
opol	0.445916	crop	highway_250	highway	s250
podk	0.316805	crop	highway_250	highway	s250
podl	0.377743	crop	highway_250	highway	s250
pom	0.400321	crop	highway_250	highway	s250
slas	0.178569	crop	highway_250	highway	s250
swiet	0.205481	crop	highway_250	highway	s250
warm	0.318845	crop	highway_250	highway	s250
wielko	0.437802	crop	highway_250	highway	s250
zachpom	0.359698	crop	highway_250	highway	s250
dolno	0.112311	built	highway_250	highway	s250
kujaw	0.131395	built	highway_250	highway	s250
lubel	0.140841	built	highway_250	highway	s250
lubu	0.108826	built	highway_250	highway	s250
lodz	0.133419	built	highway_250	highway	s250
malo	0.14187	built	highway_250	highway	s250
maz	0.180922	built	highway_250	highway	s250
opol	0.0971311	built	highway_250	highway	s250
podk	0.137922	built	highway_250	highway	s250
podl	0.121586	built	highway_250	highway	s250
pom	0.161116	built	highway_250	highway	s250
slas	0.17438	built	highway_250	highway	s250
swiet	0.173859	built	highway_250	highway	s250
warm	0.109724	built	highway_250	highway	s250
wielko	0.127323	built	highway_250	highway	s250
zachpom	0.0961149	built	highway_250	highway	s250
dolno	0.00889786	bare	highway_250	highway	s250
kujaw	0.00955992	bare	highway_250	highway	s250
lubel	0.0128921	bare	highway_250	highway	s250
lubu	0.000657128	bare	highway_250	highway	s250
lodz	0.00787117	bare	highway_250	highway	s250
malo	0.00737927	bare	highway_250	highway	s250
maz	0.0118002	bare	highway_250	highway	s250
opol	0.00233111	bare	highway_250	highway	s250
podk	0.00734414	bare	highway_250	highway	s250
podl	0.025119	bare	highway_250	highway	s250
pom	0.00339418	bare	highway_250	highway	s250
slas	0.0082991	bare	highway_250	highway	s250
swiet	0.00114288	bare	highway_250	highway	s250
warm	0.0168899	bare	highway_250	highway	s250
wielko	0.00152577	bare	highway_250	highway	s250
zachpom	0.00117463	bare	highway_250	highway	s250
dolno	0.00178365	water	highway_250	highway	s250
kujaw	0.0070195	water	highway_250	highway	s250
lubel	0.0029584	water	highway_250	highway	s250
lubu	0.00385315	water	highway_250	highway	s250
lodz	0.00122418	water	highway_250	highway	s250
malo	0.00895772	water	highway_250	highway	s250
maz	0.00393214	water	highway_250	highway	s250
opol	0.00839441	water	highway_250	highway	s250
podk	0.00663211	water	highway_250	highway	s250
podl	0.00143627	water	highway_250	highway	s250
pom	0.00599043	water	highway_250	highway	s250
slas	0.00561815	water	highway_250	highway	s250
swiet	0.00141454	water	highway_250	highway	s250
warm	0.00387879	water	highway_250	highway	s250
wielko	0.00443931	water	highway_250	highway	s250
zachpom	0.00382223	water	highway_250	highway	s250
dolno	0.000909825	wetland	highway_250	highway	s250
kujaw	0.000996851	wetland	highway_250	highway	s250
lubel	0.00123943	wetland	highway_250	highway	s250
lubu	0.00107353	wetland	highway_250	highway	s250
lodz	0.000618768	wetland	highway_250	highway	s250
malo	0.000210485	wetland	highway_250	highway	s250
maz	0.00187664	wetland	highway_250	highway	s250
opol	0.0011882	wetland	highway_250	highway	s250
podk	0.000120278	wetland	highway_250	highway	s250
podl	0.000346054	wetland	highway_250	highway	s250
pom	0.00312423	wetland	highway_250	highway	s250
slas	0.000729606	wetland	highway_250	highway	s250
swiet	0.000403525	wetland	highway_250	highway	s250
warm	0.0021474	wetland	highway_250	highway	s250
wielko	0.00101083	wetland	highway_250	highway	s250
zachpom	0.00510257	wetland	highway_250	highway	s250
dolno	0.365528	tree	rail_250	rail	s250
kujaw	0.33239	tree	rail_250	rail	s250
lubel	0.380776	tree	rail_250	rail	s250
lubu	0.51723	tree	rail_250	rail	s250
lodz	0.370116	tree	rail_250	rail	s250
malo	0.443577	tree	rail_250	rail	s250
maz	0.449979	tree	rail_250	rail	s250
opol	0.341897	tree	rail_250	rail	s250
podk	0.390379	tree	rail_250	rail	s250
podl	0.476889	tree	rail_250	rail	s250
pom	0.407081	tree	rail_250	rail	s250
slas	0.506992	tree	rail_250	rail	s250
swiet	0.428904	tree	rail_250	rail	s250
warm	0.402263	tree	rail_250	rail	s250
wielko	0.282313	tree	rail_250	rail	s250
zachpom	0.445799	tree	rail_250	rail	s250
dolno	0.184349	grass	rail_250	rail	s250
kujaw	0.136677	grass	rail_250	rail	s250
lubel	0.180825	grass	rail_250	rail	s250
lubu	0.198909	grass	rail_250	rail	s250
lodz	0.201182	grass	rail_250	rail	s250
malo	0.209236	grass	rail_250	rail	s250
maz	0.226328	grass	rail_250	rail	s250
opol	0.131397	grass	rail_250	rail	s250
podk	0.248703	grass	rail_250	rail	s250
podl	0.220091	grass	rail_250	rail	s250
pom	0.196838	grass	rail_250	rail	s250
slas	0.158103	grass	rail_250	rail	s250
swiet	0.266733	grass	rail_250	rail	s250
warm	0.261408	grass	rail_250	rail	s250
wielko	0.162695	grass	rail_250	rail	s250
zachpom	0.209921	grass	rail_250	rail	s250
dolno	0.343777	crop	rail_250	rail	s250
kujaw	0.43343	crop	rail_250	rail	s250
lubel	0.340669	crop	rail_250	rail	s250
lubu	0.205172	crop	rail_250	rail	s250
lodz	0.325373	crop	rail_250	rail	s250
malo	0.1829	crop	rail_250	rail	s250
maz	0.195102	crop	rail_250	rail	s250
opol	0.431301	crop	rail_250	rail	s250
podk	0.253235	crop	rail_250	rail	s250
podl	0.222584	crop	rail_250	rail	s250
pom	0.260871	crop	rail_250	rail	s250
slas	0.154929	crop	rail_250	rail	s250
swiet	0.205588	crop	rail_250	rail	s250
warm	0.251072	crop	rail_250	rail	s250
wielko	0.441413	crop	rail_250	rail	s250
zachpom	0.260492	crop	rail_250	rail	s250
dolno	0.0983159	built	rail_250	rail	s250
kujaw	0.0879957	built	rail_250	rail	s250
lubel	0.0878466	built	rail_250	rail	s250
lubu	0.0700375	built	rail_250	rail	s250
lodz	0.0997318	built	rail_250	rail	s250
malo	0.148969	built	rail_250	rail	s250
maz	0.122536	built	rail_250	rail	s250
opol	0.0872799	built	rail_250	rail	s250
podk	0.0995146	built	rail_250	rail	s250
podl	0.0691749	built	rail_250	rail	s250
pom	0.114754	built	rail_250	rail	s250
slas	0.164508	built	rail_250	rail	s250
swiet	0.0897439	built	rail_250	rail	s250
warm	0.0638895	built	rail_250	rail	s250
wielko	0.105073	built	rail_250	rail	s250
zachpom	0.0705505	built	rail_250	rail	s250
dolno	0.00189085	bare	rail_250	rail	s250
kujaw	0.00113407	bare	rail_250	rail	s250
lubel	0.0014388	bare	rail_250	rail	s250
lubu	0.000572031	bare	rail_250	rail	s250
lodz	0.00143338	bare	rail_250	rail	s250
malo	0.00262282	bare	rail_250	rail	s250
maz	0.00144522	bare	rail_250	rail	s250
opol	0.00114722	bare	rail_250	rail	s250
podk	0.00123761	bare	rail_250	rail	s250
podl	0.00152737	bare	rail_250	rail	s250
pom	0.00297132	bare	rail_250	rail	s250
slas	0.00357698	bare	rail_250	rail	s250
swiet	0.00175663	bare	rail_250	rail	s250
warm	0.00142591	bare	rail_250	rail	s250
wielko	0.00129859	bare	rail_250	rail	s250
zachpom	0.00112035	bare	rail_250	rail	s250
dolno	0.00494555	water	rail_250	rail	s250
kujaw	0.00707393	water	rail_250	rail	s250
lubel	0.00410041	water	rail_250	rail	s250
lubu	0.00690987	water	rail_250	rail	s250
lodz	0.00146244	water	rail_250	rail	s250
malo	0.012547	water	rail_250	rail	s250
maz	0.00331098	water	rail_250	rail	s250
opol	0.00591701	water	rail_250	rail	s250
podk	0.00624399	water	rail_250	rail	s250
podl	0.00590048	water	rail_250	rail	s250
pom	0.0153279	water	rail_250	rail	s250
slas	0.0105527	water	rail_250	rail	s250
swiet	0.00514366	water	rail_250	rail	s250
warm	0.0141496	water	rail_250	rail	s250
wielko	0.00566919	water	rail_250	rail	s250
zachpom	0.00778103	water	rail_250	rail	s250
dolno	0.00119312	wetland	rail_250	rail	s250
kujaw	0.00129856	wetland	rail_250	rail	s250
lubel	0.00434421	wetland	rail_250	rail	s250
lubu	0.00116925	wetland	rail_250	rail	s250
lodz	0.000701573	wetland	rail_250	rail	s250
malo	0.000146725	wetland	rail_250	rail	s250
maz	0.00129894	wetland	rail_250	rail	s250
opol	0.00106077	wetland	rail_250	rail	s250
podk	0.000686582	wetland	rail_250	rail	s250
podl	0.00383261	wetland	rail_250	rail	s250
pom	0.0021574	wetland	rail_250	rail	s250
slas	0.00133849	wetland	rail_250	rail	s250
swiet	0.00213008	wetland	rail_250	rail	s250
warm	0.00579212	wetland	rail_250	rail	s250
wielko	0.00153782	wetland	rail_250	rail	s250
zachpom	0.00433592	wetland	rail_250	rail	s250
dolno	0.407645	tree	levee_250	levee	s250
kujaw	0.313889	tree	levee_250	levee	s250
lubel	0.37956	tree	levee_250	levee	s250
lubu	0.48538	tree	levee_250	levee	s250
lodz	0.365062	tree	levee_250	levee	s250
malo	0.358198	tree	levee_250	levee	s250
maz	0.435698	tree	levee_250	levee	s250
opol	0.442933	tree	levee_250	levee	s250
podk	0.399966	tree	levee_250	levee	s250
podl	0.300026	tree	levee_250	levee	s250
pom	0.282596	tree	levee_250	levee	s250
slas	0.490374	tree	levee_250	levee	s250
swiet	0.398148	tree	levee_250	levee	s250
warm	0.325201	tree	levee_250	levee	s250
wielko	0.307508	tree	levee_250	levee	s250
zachpom	0.41944	tree	levee_250	levee	s250
dolno	0.233533	grass	levee_250	levee	s250
kujaw	0.222213	grass	levee_250	levee	s250
lubel	0.278049	grass	levee_250	levee	s250
lubu	0.292608	grass	levee_250	levee	s250
lodz	0.320203	grass	levee_250	levee	s250
malo	0.245013	grass	levee_250	levee	s250
maz	0.285299	grass	levee_250	levee	s250
opol	0.149395	grass	levee_250	levee	s250
podk	0.259372	grass	levee_250	levee	s250
podl	0.409881	grass	levee_250	levee	s250
pom	0.285081	grass	levee_250	levee	s250
slas	0.198978	grass	levee_250	levee	s250
swiet	0.333707	grass	levee_250	levee	s250
warm	0.307669	grass	levee_250	levee	s250
wielko	0.297832	grass	levee_250	levee	s250
zachpom	0.276776	grass	levee_250	levee	s250
dolno	0.263529	crop	levee_250	levee	s250
kujaw	0.348475	crop	levee_250	levee	s250
lubel	0.184665	crop	levee_250	levee	s250
lubu	0.134242	crop	levee_250	levee	s250
lodz	0.202923	crop	levee_250	levee	s250
malo	0.264928	crop	levee_250	levee	s250
maz	0.14047	crop	levee_250	levee	s250
opol	0.312381	crop	levee_250	levee	s250
podk	0.234101	crop	levee_250	levee	s250
podl	0.158902	crop	levee_250	levee	s250
pom	0.310498	crop	levee_250	levee	s250
slas	0.161189	crop	levee_250	levee	s250
swiet	0.155836	crop	levee_250	levee	s250
warm	0.25705	crop	levee_250	levee	s250
wielko	0.281077	crop	levee_250	levee	s250
zachpom	0.124683	crop	levee_250	levee	s250
dolno	0.0405598	built	levee_250	levee	s250
kujaw	0.0512765	built	levee_250	levee	s250
lubel	0.0329074	built	levee_250	levee	s250
lubu	0.0236851	built	levee_250	levee	s250
lodz	0.0446929	built	levee_250	levee	s250
malo	0.0614608	built	levee_250	levee	s250
maz	0.0612141	built	levee_250	levee	s250
opol	0.0349851	built	levee_250	levee	s250
podk	0.0445077	built	levee_250	levee	s250
podl	0.045837	built	levee_250	levee	s250
pom	0.0506747	built	levee_250	levee	s250
slas	0.069487	built	levee_250	levee	s250
swiet	0.0388573	built	levee_250	levee	s250
warm	0.0273787	built	levee_250	levee	s250
wielko	0.0504237	built	levee_250	levee	s250
zachpom	0.0330271	built	levee_250	levee	s250
dolno	0.00221015	bare	levee_250	levee	s250
kujaw	0.00211119	bare	levee_250	levee	s250
lubel	0.000748857	bare	levee_250	levee	s250
lubu	0.000756941	bare	levee_250	levee	s250
lodz	0.00166898	bare	levee_250	levee	s250
malo	0.00315402	bare	levee_250	levee	s250
maz	0.00155464	bare	levee_250	levee	s250
opol	0.00104339	bare	levee_250	levee	s250
podk	0.00118459	bare	levee_250	levee	s250
podl	0.00137289	bare	levee_250	levee	s250
pom	0.00167207	bare	levee_250	levee	s250
slas	0.00292101	bare	levee_250	levee	s250
swiet	0.00123328	bare	levee_250	levee	s250
warm	0.00126564	bare	levee_250	levee	s250
wielko	0.00158391	bare	levee_250	levee	s250
zachpom	0.00197586	bare	levee_250	levee	s250
dolno	0.0402763	water	levee_250	levee	s250
kujaw	0.0502894	water	levee_250	levee	s250
lubel	0.0799909	water	levee_250	levee	s250
lubu	0.0521563	water	levee_250	levee	s250
lodz	0.0468529	water	levee_250	levee	s250
malo	0.0616694	water	levee_250	levee	s250
maz	0.056321	water	levee_250	levee	s250
opol	0.0513377	water	levee_250	levee	s250
podk	0.0517902	water	levee_250	levee	s250
podl	0.0394832	water	levee_250	levee	s250
pom	0.0392028	water	levee_250	levee	s250
slas	0.0687676	water	levee_250	levee	s250
swiet	0.0555886	water	levee_250	levee	s250
warm	0.0448608	water	levee_250	levee	s250
wielko	0.0501451	water	levee_250	levee	s250
zachpom	0.0816377	water	levee_250	levee	s250
dolno	0.0122463	wetland	levee_250	levee	s250
kujaw	0.0117465	wetland	levee_250	levee	s250
lubel	0.0440789	wetland	levee_250	levee	s250
lubu	0.0111718	wetland	levee_250	levee	s250
lodz	0.018597	wetland	levee_250	levee	s250
malo	0.00557659	wetland	levee_250	levee	s250
maz	0.0194432	wetland	levee_250	levee	s250
opol	0.00792506	wetland	levee_250	levee	s250
podk	0.00907567	wetland	levee_250	levee	s250
podl	0.0444984	wetland	levee_250	levee	s250
pom	0.0302755	wetland	levee_250	levee	s250
slas	0.00828336	wetland	levee_250	levee	s250
swiet	0.0166304	wetland	levee_250	levee	s250
warm	0.0365753	wetland	levee_250	levee	s250
wielko	0.0114301	wetland	levee_250	levee	s250
zachpom	0.0624595	wetland	levee_250	levee	s250
dolno	0.241487	tree	highway_500	highway	s500
kujaw	0.258202	tree	highway_500	highway	s500
lubel	0.228888	tree	highway_500	highway	s500
lubu	0.505348	tree	highway_500	highway	s500
lodz	0.265696	tree	highway_500	highway	s500
malo	0.413661	tree	highway_500	highway	s500
maz	0.32641	tree	highway_500	highway	s500
opol	0.323782	tree	highway_500	highway	s500
podk	0.238955	tree	highway_500	highway	s500
podl	0.172914	tree	highway_500	highway	s500
pom	0.244448	tree	highway_500	highway	s500
slas	0.419763	tree	highway_500	highway	s500
swiet	0.387813	tree	highway_500	highway	s500
warm	0.309429	tree	highway_500	highway	s500
wielko	0.220636	tree	highway_500	highway	s500
zachpom	0.33393	tree	highway_500	highway	s500
dolno	0.16122	grass	highway_500	highway	s500
kujaw	0.165493	grass	highway_500	highway	s500
lubel	0.188137	grass	highway_500	highway	s500
lubu	0.18211	grass	highway_500	highway	s500
lodz	0.251894	grass	highway_500	highway	s500
malo	0.258667	grass	highway_500	highway	s500
maz	0.269921	grass	highway_500	highway	s500
opol	0.119483	grass	highway_500	highway	s500
podk	0.307083	grass	highway_500	highway	s500
podl	0.325737	grass	highway_500	highway	s500
pom	0.178106	grass	highway_500	highway	s500
slas	0.226772	grass	highway_500	highway	s500
swiet	0.257324	grass	highway_500	highway	s500
warm	0.252218	grass	highway_500	highway	s500
wielko	0.201897	grass	highway_500	highway	s500
zachpom	0.222916	grass	highway_500	highway	s500
dolno	0.508764	crop	highway_500	highway	s500
kujaw	0.473733	crop	highway_500	highway	s500
lubel	0.479351	crop	highway_500	highway	s500
lubu	0.233706	crop	highway_500	highway	s500
lodz	0.38751	crop	highway_500	highway	s500
malo	0.197819	crop	highway_500	highway	s500
maz	0.258679	crop	highway_500	highway	s500
opol	0.476965	crop	highway_500	highway	s500
podk	0.34932	crop	highway_500	highway	s500
podl	0.405606	crop	highway_500	highway	s500
pom	0.440297	crop	highway_500	highway	s500
slas	0.196624	crop	highway_500	highway	s500
swiet	0.229465	crop	highway_500	highway	s500
warm	0.344739	crop	highway_500	highway	s500
wielko	0.481753	crop	highway_500	highway	s500
zachpom	0.368574	crop	highway_500	highway	s500
dolno	0.0787981	built	highway_500	highway	s500
kujaw	0.0864078	built	highway_500	highway	s500
lubel	0.0903721	built	highway_500	highway	s500
lubu	0.0692798	built	highway_500	highway	s500
lodz	0.087263	built	highway_500	highway	s500
malo	0.115336	built	highway_500	highway	s500
maz	0.130722	built	highway_500	highway	s500
opol	0.0654366	built	highway_500	highway	s500
podk	0.0907209	built	highway_500	highway	s500
podl	0.0779298	built	highway_500	highway	s500
pom	0.123825	built	highway_500	highway	s500
slas	0.142971	built	highway_500	highway	s500
swiet	0.12112	built	highway_500	highway	s500
warm	0.0704239	built	highway_500	highway	s500
wielko	0.0879046	built	highway_500	highway	s500
zachpom	0.0612651	built	highway_500	highway	s500
dolno	0.00560981	bare	highway_500	highway	s500
kujaw	0.00573344	bare	highway_500	highway	s500
lubel	0.00707748	bare	highway_500	highway	s500
lubu	0.00067144	bare	highway_500	highway	s500
lodz	0.00486439	bare	highway_500	highway	s500
malo	0.00489939	bare	highway_500	highway	s500
maz	0.00728734	bare	highway_500	highway	s500
opol	0.00210181	bare	highway_500	highway	s500
podk	0.00440612	bare	highway_500	highway	s500
podl	0.0155418	bare	highway_500	highway	s500
pom	0.00336723	bare	highway_500	highway	s500
slas	0.00613999	bare	highway_500	highway	s500
swiet	0.0010236	bare	highway_500	highway	s500
warm	0.00970715	bare	highway_500	highway	s500
wielko	0.00156803	bare	highway_500	highway	s500
zachpom	0.000943625	bare	highway_500	highway	s500
dolno	0.00282039	water	highway_500	highway	s500
kujaw	0.00895792	water	highway_500	highway	s500
lubel	0.00441022	water	highway_500	highway	s500
lubu	0.00716503	water	highway_500	highway	s500
lodz	0.00195289	water	highway_500	highway	s500
malo	0.00936961	water	highway_500	highway	s500
maz	0.00471134	water	highway_500	highway	s500
opol	0.0106407	water	highway_500	highway	s500
podk	0.00935517	water	highway_500	highway	s500
podl	0.00184175	water	highway_500	highway	s500
pom	0.00645453	water	highway_500	highway	s500
slas	0.00688364	water	highway_500	highway	s500
swiet	0.00262281	water	highway_500	highway	s500
warm	0.0100352	water	highway_500	highway	s500
wielko	0.0049046	water	highway_500	highway	s500
zachpom	0.00588804	water	highway_500	highway	s500
dolno	0.00130074	wetland	highway_500	highway	s500
kujaw	0.00147241	wetland	highway_500	highway	s500
lubel	0.0017649	wetland	highway_500	highway	s500
lubu	0.00171946	wetland	highway_500	highway	s500
lodz	0.000819773	wetland	highway_500	highway	s500
malo	0.000247516	wetland	highway_500	highway	s500
maz	0.00226919	wetland	highway_500	highway	s500
opol	0.00159093	wetland	highway_500	highway	s500
podk	0.000159343	wetland	highway_500	highway	s500
podl	0.000429439	wetland	highway_500	highway	s500
pom	0.00350153	wetland	highway_500	highway	s500
slas	0.000845566	wetland	highway_500	highway	s500
swiet	0.000632228	wetland	highway_500	highway	s500
warm	0.00344806	wetland	highway_500	highway	s500
wielko	0.00133597	wetland	highway_500	highway	s500
zachpom	0.00648312	wetland	highway_500	highway	s500
dolno	0.353242	tree	rail_500	rail	s500
kujaw	0.324016	tree	rail_500	rail	s500
lubel	0.369871	tree	rail_500	rail	s500
lubu	0.513789	tree	rail_500	rail	s500
lodz	0.357798	tree	rail_500	rail	s500
malo	0.446373	tree	rail_500	rail	s500
maz	0.437451	tree	rail_500	rail	s500
opol	0.333931	tree	rail_500	rail	s500
podk	0.401029	tree	rail_500	rail	s500
podl	0.46655	tree	rail_500	rail	s500
pom	0.400486	tree	rail_500	rail	s500
slas	0.496258	tree	rail_500	rail	s500
swiet	0.429941	tree	rail_500	rail	s500
warm	0.387037	tree	rail_500	rail	s500
wielko	0.277293	tree	rail_500	rail	s500
zachpom	0.431272	tree	rail_500	rail	s500
dolno	0.18372	grass	rail_500	rail	s500
kujaw	0.134767	grass	rail_500	rail	s500
lubel	0.1835	grass	rail_500	rail	s500
lubu	0.196952	grass	rail_500	rail	s500
lodz	0.203945	grass	rail_500	rail	s500
malo	0.215496	grass	rail_500	rail	s500
maz	0.232653	grass	rail_500	rail	s500
opol	0.130949	grass	rail_500	rail	s500
podk	0.238274	grass	rail_500	rail	s500
podl	0.220418	grass	rail_500	rail	s500
pom	0.187987	grass	rail_500	rail	s500
slas	0.165727	grass	rail_500	rail	s500
swiet	0.26873	grass	rail_500	rail	s500
warm	0.25824	grass	rail_500	rail	s500
wielko	0.158983	grass	rail_500	rail	s500
zachpom	0.207106	grass	rail_500	rail	s500
dolno	0.361668	crop	rail_500	rail	s500
kujaw	0.448418	crop	rail_500	rail	s500
lubel	0.358904	crop	rail_500	rail	s500
lubu	0.216676	crop	rail_500	rail	s500
lodz	0.340712	crop	rail_500	rail	s500
malo	0.192463	crop	rail_500	rail	s500
maz	0.209716	crop	rail_500	rail	s500
opol	0.447643	crop	rail_500	rail	s500
podk	0.259618	crop	rail_500	rail	s500
podl	0.234888	crop	rail_500	rail	s500
pom	0.278798	crop	rail_500	rail	s500
slas	0.166619	crop	rail_500	rail	s500
swiet	0.212913	crop	rail_500	rail	s500
warm	0.266095	crop	rail_500	rail	s500
wielko	0.454857	crop	rail_500	rail	s500
zachpom	0.279503	crop	rail_500	rail	s500
dolno	0.0908092	built	rail_500	rail	s500
kujaw	0.0790736	built	rail_500	rail	s500
lubel	0.0759559	built	rail_500	rail	s500
lubu	0.0610044	built	rail_500	rail	s500
lodz	0.0927982	built	rail_500	rail	s500
malo	0.129703	built	rail_500	rail	s500
maz	0.112976	built	rail_500	rail	s500
opol	0.0767414	built	rail_500	rail	s500
podk	0.0922806	built	rail_500	rail	s500
podl	0.0645892	built	rail_500	rail	s500
pom	0.102457	built	rail_500	rail	s500
slas	0.152471	built	rail_500	rail	s500
swiet	0.0768927	built	rail_500	rail	s500
warm	0.0573843	built	rail_500	rail	s500
wielko	0.0971352	built	rail_500	rail	s500
zachpom	0.0627433	built	rail_500	rail	s500
dolno	0.00229227	bare	rail_500	rail	s500
kujaw	0.00136339	bare	rail_500	rail	s500
lubel	0.00119635	bare	rail_500	rail	s500
lubu	0.000682466	bare	rail_500	rail	s500
lodz	0.00150545	bare	rail_500	rail	s500
malo	0.00282358	bare	rail_500	rail	s500
maz	0.00135191	bare	rail_500	rail	s500
opol	0.001082	bare	rail_500	rail	s500
podk	0.00118849	bare	rail_500	rail	s500
podl	0.00113734	bare	rail_500	rail	s500
pom	0.00287018	bare	rail_500	rail	s500
slas	0.0032216	bare	rail_500	rail	s500
swiet	0.00197991	bare	rail_500	rail	s500
warm	0.0016007	bare	rail_500	rail	s500
wielko	0.00121246	bare	rail_500	rail	s500
zachpom	0.00120652	bare	rail_500	rail	s500
dolno	0.00686026	water	rail_500	rail	s500
kujaw	0.0105343	water	rail_500	rail	s500
lubel	0.00554791	water	rail_500	rail	s500
lubu	0.00922754	water	rail_500	rail	s500
lodz	0.0022543	water	rail_500	rail	s500
malo	0.0127758	water	rail_500	rail	s500
maz	0.00413996	water	rail_500	rail	s500
opol	0.00842746	water	rail_500	rail	s500
podk	0.00678356	water	rail_500	rail	s500
podl	0.0082468	water	rail_500	rail	s500
pom	0.024859	water	rail_500	rail	s500
slas	0.0139968	water	rail_500	rail	s500
swiet	0.00694944	water	rail_500	rail	s500
warm	0.0238984	water	rail_500	rail	s500
wielko	0.00869381	water	rail_500	rail	s500
zachpom	0.0127963	water	rail_500	rail	s500
dolno	0.00140777	wetland	rail_500	rail	s500
kujaw	0.0018278	wetland	rail_500	rail	s500
lubel	0.00502525	wetland	rail_500	rail	s500
lubu	0.00166878	wetland	rail_500	rail	s500
lodz	0.000987533	wetland	rail_500	rail	s500
malo	0.000365589	wetland	rail_500	rail	s500
maz	0.00171177	wetland	rail_500	rail	s500
opol	0.00122609	wetland	rail_500	rail	s500
podk	0.000825764	wetland	rail_500	rail	s500
podl	0.00416903	wetland	rail_500	rail	s500
pom	0.0025422	wetland	rail_500	rail	s500
slas	0.00170719	wetland	rail_500	rail	s500
swiet	0.00259335	wetland	rail_500	rail	s500
warm	0.00574539	wetland	rail_500	rail	s500
wielko	0.00182527	wetland	rail_500	rail	s500
zachpom	0.00537362	wetland	rail_500	rail	s500
dolno	0.382043	tree	levee_500	levee	s500
kujaw	0.303848	tree	levee_500	levee	s500
lubel	0.36679	tree	levee_500	levee	s500
lubu	0.504704	tree	levee_500	levee	s500
lodz	0.358674	tree	levee_500	levee	s500
malo	0.375025	tree	levee_500	levee	s500
maz	0.416564	tree	levee_500	levee	s500
opol	0.409493	tree	levee_500	levee	s500
podk	0.411791	tree	levee_500	levee	s500
podl	0.305564	tree	levee_500	levee	s500
pom	0.307417	tree	levee_500	levee	s500
slas	0.477421	tree	levee_500	levee	s500
swiet	0.406802	tree	levee_500	levee	s500
warm	0.332916	tree	levee_500	levee	s500
wielko	0.302793	tree	levee_500	levee	s500
zachpom	0.419402	tree	levee_500	levee	s500
dolno	0.213365	grass	levee_500	levee	s500
kujaw	0.188334	grass	levee_500	levee	s500
lubel	0.260725	grass	levee_500	levee	s500
lubu	0.264345	grass	levee_500	levee	s500
lodz	0.28602	grass	levee_500	levee	s500
malo	0.231908	grass	levee_500	levee	s500
maz	0.277704	grass	levee_500	levee	s500
opol	0.142176	grass	levee_500	levee	s500
podk	0.245426	grass	levee_500	levee	s500
podl	0.379112	grass	levee_500	levee	s500
pom	0.242033	grass	levee_500	levee	s500
slas	0.193152	grass	levee_500	levee	s500
swiet	0.314833	grass	levee_500	levee	s500
warm	0.290297	grass	levee_500	levee	s500
wielko	0.247131	grass	levee_500	levee	s500
zachpom	0.255924	grass	levee_500	levee	s500
dolno	0.325889	crop	levee_500	levee	s500
kujaw	0.392546	crop	levee_500	levee	s500
lubel	0.254737	crop	levee_500	levee	s500
lubu	0.158085	crop	levee_500	levee	s500
lodz	0.266862	crop	levee_500	levee	s500
malo	0.278131	crop	levee_500	levee	s500
maz	0.179103	crop	levee_500	levee	s500
opol	0.365943	crop	levee_500	levee	s500
podk	0.255437	crop	levee_500	levee	s500
podl	0.211123	crop	levee_500	levee	s500
pom	0.32691	crop	levee_500	levee	s500
slas	0.194234	crop	levee_500	levee	s500
swiet	0.188646	crop	levee_500	levee	s500
warm	0.280738	crop	levee_500	levee	s500
wielko	0.35602	crop	levee_500	levee	s500
zachpom	0.172283	crop	levee_500	levee	s500
dolno	0.0450128	built	levee_500	levee	s500
kujaw	0.0554265	built	levee_500	levee	s500
lubel	0.0422603	built	levee_500	levee	s500
lubu	0.0281561	built	levee_500	levee	s500
lodz	0.0536452	built	levee_500	levee	s500
malo	0.0701777	built	levee_500	levee	s500
maz	0.0673284	built	levee_500	levee	s500
opol	0.0419676	built	levee_500	levee	s500
podk	0.0495603	built	levee_500	levee	s500
podl	0.052882	built	levee_500	levee	s500
pom	0.0561115	built	levee_500	levee	s500
slas	0.0845587	built	levee_500	levee	s500
swiet	0.0436505	built	levee_500	levee	s500
warm	0.030677	built	levee_500	levee	s500
wielko	0.0563289	built	levee_500	levee	s500
zachpom	0.0387881	built	levee_500	levee	s500
dolno	0.00233468	bare	levee_500	levee	s500
kujaw	0.00139341	bare	levee_500	levee	s500
lubel	0.00105513	bare	levee_500	levee	s500
lubu	0.000804646	bare	levee_500	levee	s500
lodz	0.00157988	bare	levee_500	levee	s500
malo	0.00286605	bare	levee_500	levee	s500
maz	0.00178081	bare	levee_500	levee	s500
opol	0.00118823	bare	levee_500	levee	s500
podk	0.00103968	bare	levee_500	levee	s500
podl	0.00128936	bare	levee_500	levee	s500
pom	0.00185386	bare	levee_500	levee	s500
slas	0.00297333	bare	levee_500	levee	s500
swiet	0.00170376	bare	levee_500	levee	s500
warm	0.00131875	bare	levee_500	levee	s500
wielko	0.00136338	bare	levee_500	levee	s500
zachpom	0.00175112	bare	levee_500	levee	s500
dolno	0.0248263	water	levee_500	levee	s500
kujaw	0.0516754	water	levee_500	levee	s500
lubel	0.0502022	water	levee_500	levee	s500
lubu	0.0369236	water	levee_500	levee	s500
lodz	0.0240849	water	levee_500	levee	s500
malo	0.0390564	water	levee_500	levee	s500
maz	0.0474255	water	levee_500	levee	s500
opol	0.0347082	water	levee_500	levee	s500
podk	0.0321101	water	levee_500	levee	s500
podl	0.0251164	water	levee_500	levee	s500
pom	0.04592	water	levee_500	levee	s500
slas	0.043167	water	levee_500	levee	s500
swiet	0.0361415	water	levee_500	levee	s500
warm	0.0409202	water	levee_500	levee	s500
wielko	0.0304026	water	levee_500	levee	s500
zachpom	0.0697894	water	levee_500	levee	s500
dolno	0.00652871	wetland	levee_500	levee	s500
kujaw	0.00677664	wetland	levee_500	levee	s500
lubel	0.0242301	wetland	levee_500	levee	s500
lubu	0.00698108	wetland	levee_500	levee	s500
lodz	0.00913352	wetland	levee_500	levee	s500
malo	0.0028349	wetland	levee_500	levee	s500
maz	0.0100945	wetland	levee_500	levee	s500
opol	0.00452352	wetland	levee_500	levee	s500
podk	0.00463431	wetland	levee_500	levee	s500
podl	0.0249105	wetland	levee_500	levee	s500
pom	0.0197541	wetland	levee_500	levee	s500
slas	0.00449475	wetland	levee_500	levee	s500
swiet	0.00822305	wetland	levee_500	levee	s500
warm	0.0231326	wetland	levee_500	levee	s500
wielko	0.00596099	wetland	levee_500	levee	s500
zachpom	0.0420629	wetland	levee_500	levee	s500
dolno	0.26651	tree	highway_1000	highway	s1000
kujaw	0.27914	tree	highway_1000	highway	s1000
lubel	0.259678	tree	highway_1000	highway	s1000
lubu	0.519139	tree	highway_1000	highway	s1000
lodz	0.289222	tree	highway_1000	highway	s1000
malo	0.449379	tree	highway_1000	highway	s1000
maz	0.354757	tree	highway_1000	highway	s1000
opol	0.337245	tree	highway_1000	highway	s1000
podk	0.2694	tree	highway_1000	highway	s1000
podl	0.194743	tree	highway_1000	highway	s1000
pom	0.27708	tree	highway_1000	highway	s1000
slas	0.439183	tree	highway_1000	highway	s1000
swiet	0.433936	tree	highway_1000	highway	s1000
warm	0.334584	tree	highway_1000	highway	s1000
wielko	0.239715	tree	highway_1000	highway	s1000
zachpom	0.36809	tree	highway_1000	highway	s1000
dolno	0.150964	grass	highway_1000	highway	s1000
kujaw	0.154711	grass	highway_1000	highway	s1000
lubel	0.176536	grass	highway_1000	highway	s1000
lubu	0.175025	grass	highway_1000	highway	s1000
lodz	0.233543	grass	highway_1000	highway	s1000
malo	0.236001	grass	highway_1000	highway	s1000
maz	0.261797	grass	highway_1000	highway	s1000
opol	0.106968	grass	highway_1000	highway	s1000
podk	0.29331	grass	highway_1000	highway	s1000
podl	0.325422	grass	highway_1000	highway	s1000
pom	0.159287	grass	highway_1000	highway	s1000
slas	0.21813	grass	highway_1000	highway	s1000
swiet	0.229262	grass	highway_1000	highway	s1000
warm	0.238494	grass	highway_1000	highway	s1000
wielko	0.178534	grass	highway_1000	highway	s1000
zachpom	0.209167	grass	highway_1000	highway	s1000
dolno	0.510755	crop	highway_1000	highway	s1000
kujaw	0.48479	crop	highway_1000	highway	s1000
lubel	0.486497	crop	highway_1000	highway	s1000
lubu	0.240355	crop	highway_1000	highway	s1000
lodz	0.406112	crop	highway_1000	highway	s1000
malo	0.193016	crop	highway_1000	highway	s1000
maz	0.263957	crop	highway_1000	highway	s1000
opol	0.488678	crop	highway_1000	highway	s1000
podk	0.352533	crop	highway_1000	highway	s1000
podl	0.410783	crop	highway_1000	highway	s1000
pom	0.44954	crop	highway_1000	highway	s1000
slas	0.195339	crop	highway_1000	highway	s1000
swiet	0.232373	crop	highway_1000	highway	s1000
warm	0.346858	crop	highway_1000	highway	s1000
wielko	0.499956	crop	highway_1000	highway	s1000
zachpom	0.358264	crop	highway_1000	highway	s1000
dolno	0.063731	built	highway_1000	highway	s1000
kujaw	0.0631749	built	highway_1000	highway	s1000
lubel	0.0679268	built	highway_1000	highway	s1000
lubu	0.0530384	built	highway_1000	highway	s1000
lodz	0.0651867	built	highway_1000	highway	s1000
malo	0.10678	built	highway_1000	highway	s1000
maz	0.106363	built	highway_1000	highway	s1000
opol	0.0502757	built	highway_1000	highway	s1000
podk	0.0722731	built	highway_1000	highway	s1000
podl	0.0565444	built	highway_1000	highway	s1000
pom	0.101344	built	highway_1000	highway	s1000
slas	0.132814	built	highway_1000	highway	s1000
swiet	0.097697	built	highway_1000	highway	s1000
warm	0.0496664	built	highway_1000	highway	s1000
wielko	0.0724861	built	highway_1000	highway	s1000
zachpom	0.0465533	built	highway_1000	highway	s1000
dolno	0.00364875	bare	highway_1000	highway	s1000
kujaw	0.00379264	bare	highway_1000	highway	s1000
lubel	0.00376504	bare	highway_1000	highway	s1000
lubu	0.000849437	bare	highway_1000	highway	s1000
lodz	0.00295428	bare	highway_1000	highway	s1000
malo	0.00371551	bare	highway_1000	highway	s1000
maz	0.00465212	bare	highway_1000	highway	s1000
opol	0.00181323	bare	highway_1000	highway	s1000
podk	0.00302295	bare	highway_1000	highway	s1000
podl	0.00981762	bare	highway_1000	highway	s1000
pom	0.00253286	bare	highway_1000	highway	s1000
slas	0.00512983	bare	highway_1000	highway	s1000
swiet	0.00183337	bare	highway_1000	highway	s1000
warm	0.00565509	bare	highway_1000	highway	s1000
wielko	0.00148507	bare	highway_1000	highway	s1000
zachpom	0.000892589	bare	highway_1000	highway	s1000
dolno	0.00318162	water	highway_1000	highway	s1000
kujaw	0.0121029	water	highway_1000	highway	s1000
lubel	0.00389693	water	highway_1000	highway	s1000
lubu	0.0102771	water	highway_1000	highway	s1000
lodz	0.00215037	water	highway_1000	highway	s1000
malo	0.0109208	water	highway_1000	highway	s1000
maz	0.00608498	water	highway_1000	highway	s1000
opol	0.0131755	water	highway_1000	highway	s1000
podk	0.00930887	water	highway_1000	highway	s1000
podl	0.00209597	water	highway_1000	highway	s1000
pom	0.00646175	water	highway_1000	highway	s1000
slas	0.00868145	water	highway_1000	highway	s1000
swiet	0.00422751	water	highway_1000	highway	s1000
warm	0.0191525	water	highway_1000	highway	s1000
wielko	0.00637606	water	highway_1000	highway	s1000
zachpom	0.00860305	water	highway_1000	highway	s1000
dolno	0.00120904	wetland	highway_1000	highway	s1000
kujaw	0.00228768	wetland	highway_1000	highway	s1000
lubel	0.00170041	wetland	highway_1000	highway	s1000
lubu	0.00131542	wetland	highway_1000	highway	s1000
lodz	0.000831948	wetland	highway_1000	highway	s1000
malo	0.000187699	wetland	highway_1000	highway	s1000
maz	0.00238807	wetland	highway_1000	highway	s1000
opol	0.00184469	wetland	highway_1000	highway	s1000
podk	0.000152231	wetland	highway_1000	highway	s1000
podl	0.000594322	wetland	highway_1000	highway	s1000
pom	0.00375425	wetland	highway_1000	highway	s1000
slas	0.00072249	wetland	highway_1000	highway	s1000
swiet	0.0006709	wetland	highway_1000	highway	s1000
warm	0.00558177	wetland	highway_1000	highway	s1000
wielko	0.00144757	wetland	highway_1000	highway	s1000
zachpom	0.00842896	wetland	highway_1000	highway	s1000
dolno	0.349548	tree	rail_1000	rail	s1000
kujaw	0.316503	tree	rail_1000	rail	s1000
lubel	0.361819	tree	rail_1000	rail	s1000
lubu	0.510242	tree	rail_1000	rail	s1000
lodz	0.347408	tree	rail_1000	rail	s1000
malo	0.455062	tree	rail_1000	rail	s1000
maz	0.427682	tree	rail_1000	rail	s1000
opol	0.333363	tree	rail_1000	rail	s1000
podk	0.422721	tree	rail_1000	rail	s1000
podl	0.458531	tree	rail_1000	rail	s1000
pom	0.400155	tree	rail_1000	rail	s1000
slas	0.488475	tree	rail_1000	rail	s1000
swiet	0.440763	tree	rail_1000	rail	s1000
warm	0.381544	tree	rail_1000	rail	s1000
wielko	0.274645	tree	rail_1000	rail	s1000
zachpom	0.419261	tree	rail_1000	rail	s1000
dolno	0.182605	grass	rail_1000	rail	s1000
kujaw	0.135135	grass	rail_1000	rail	s1000
lubel	0.189135	grass	rail_1000	rail	s1000
lubu	0.197871	grass	rail_1000	rail	s1000
lodz	0.207427	grass	rail_1000	rail	s1000
malo	0.21823	grass	rail_1000	rail	s1000
maz	0.239484	grass	rail_1000	rail	s1000
opol	0.126068	grass	rail_1000	rail	s1000
podk	0.228031	grass	rail_1000	rail	s1000
podl	0.223993	grass	rail_1000	rail	s1000
pom	0.178259	grass	rail_1000	rail	s1000
slas	0.172718	grass	rail_1000	rail	s1000
swiet	0.263966	grass	rail_1000	rail	s1000
warm	0.256271	grass	rail_1000	rail	s1000
wielko	0.155054	grass	rail_1000	rail	s1000
zachpom	0.207088	grass	rail_1000	rail	s1000
dolno	0.378312	crop	rail_1000	rail	s1000
kujaw	0.462582	crop	rail_1000	rail	s1000
lubel	0.373336	crop	rail_1000	rail	s1000
lubu	0.227014	crop	rail_1000	rail	s1000
lodz	0.355092	crop	rail_1000	rail	s1000
malo	0.20104	crop	rail_1000	rail	s1000
maz	0.225205	crop	rail_1000	rail	s1000
opol	0.461983	crop	rail_1000	rail	s1000
podk	0.26049	crop	rail_1000	rail	s1000
podl	0.243173	crop	rail_1000	rail	s1000
pom	0.299471	crop	rail_1000	rail	s1000
slas	0.180445	crop	rail_1000	rail	s1000
swiet	0.21679	crop	rail_1000	rail	s1000
warm	0.274908	crop	rail_1000	rail	s1000
wielko	0.473437	crop	rail_1000	rail	s1000
zachpom	0.292103	crop	rail_1000	rail	s1000
dolno	0.0777011	built	rail_1000	rail	s1000
kujaw	0.0673329	built	rail_1000	rail	s1000
lubel	0.0629745	built	rail_1000	rail	s1000
lubu	0.0506281	built	rail_1000	rail	s1000
lodz	0.0845519	built	rail_1000	rail	s1000
malo	0.108766	built	rail_1000	rail	s1000
maz	0.0994985	built	rail_1000	rail	s1000
opol	0.0667619	built	rail_1000	rail	s1000
podk	0.0803449	built	rail_1000	rail	s1000
podl	0.0588478	built	rail_1000	rail	s1000
pom	0.0833335	built	rail_1000	rail	s1000
slas	0.136018	built	rail_1000	rail	s1000
swiet	0.0668344	built	rail_1000	rail	s1000
warm	0.0475956	built	rail_1000	rail	s1000
wielko	0.0815801	built	rail_1000	rail	s1000
zachpom	0.0530744	built	rail_1000	rail	s1000
dolno	0.00243957	bare	rail_1000	rail	s1000
kujaw	0.00139055	bare	rail_1000	rail	s1000
lubel	0.00126497	bare	rail_1000	rail	s1000
lubu	0.000741384	bare	rail_1000	rail	s1000
lodz	0.00147941	bare	rail_1000	rail	s1000
malo	0.00285855	bare	rail_1000	rail	s1000
maz	0.00124244	bare	rail_1000	rail	s1000
opol	0.00122669	bare	rail_1000	rail	s1000
podk	0.000993943	bare	rail_1000	rail	s1000
podl	0.00101206	bare	rail_1000	rail	s1000
pom	0.00229857	bare	rail_1000	rail	s1000
slas	0.00339153	bare	rail_1000	rail	s1000
swiet	0.00235677	bare	rail_1000	rail	s1000
warm	0.00149878	bare	rail_1000	rail	s1000
wielko	0.00111644	bare	rail_1000	rail	s1000
zachpom	0.00122353	bare	rail_1000	rail	s1000
dolno	0.00799855	water	rail_1000	rail	s1000
kujaw	0.0144404	water	rail_1000	rail	s1000
lubel	0.00624684	water	rail_1000	rail	s1000
lubu	0.0113376	water	rail_1000	rail	s1000
lodz	0.00246819	water	rail_1000	rail	s1000
malo	0.0133042	water	rail_1000	rail	s1000
maz	0.00512582	water	rail_1000	rail	s1000
opol	0.0093793	water	rail_1000	rail	s1000
podk	0.00666343	water	rail_1000	rail	s1000
podl	0.0100087	water	rail_1000	rail	s1000
pom	0.0338877	water	rail_1000	rail	s1000
slas	0.0173624	water	rail_1000	rail	s1000
swiet	0.00696499	water	rail_1000	rail	s1000
warm	0.0324016	water	rail_1000	rail	s1000
wielko	0.0120781	water	rail_1000	rail	s1000
zachpom	0.0202711	water	rail_1000	rail	s1000
dolno	0.00139595	wetland	rail_1000	rail	s1000
kujaw	0.0026163	wetland	rail_1000	rail	s1000
lubel	0.00522396	wetland	rail_1000	rail	s1000
lubu	0.00216671	wetland	rail_1000	rail	s1000
lodz	0.00157347	wetland	rail_1000	rail	s1000
malo	0.000738282	wetland	rail_1000	rail	s1000
maz	0.00176255	wetland	rail_1000	rail	s1000
opol	0.00121828	wetland	rail_1000	rail	s1000
podk	0.000756682	wetland	rail_1000	rail	s1000
podl	0.00443321	wetland	rail_1000	rail	s1000
pom	0.00259591	wetland	rail_1000	rail	s1000
slas	0.00158947	wetland	rail_1000	rail	s1000
swiet	0.00232401	wetland	rail_1000	rail	s1000
warm	0.00578097	wetland	rail_1000	rail	s1000
wielko	0.0020894	wetland	rail_1000	rail	s1000
zachpom	0.00697884	wetland	rail_1000	rail	s1000
dolno	0.370869	tree	levee_1000	levee	s1000
kujaw	0.30017	tree	levee_1000	levee	s1000
lubel	0.347222	tree	levee_1000	levee	s1000
lubu	0.526048	tree	levee_1000	levee	s1000
lodz	0.350626	tree	levee_1000	levee	s1000
malo	0.402602	tree	levee_1000	levee	s1000
maz	0.403618	tree	levee_1000	levee	s1000
opol	0.374998	tree	levee_1000	levee	s1000
podk	0.433923	tree	levee_1000	levee	s1000
podl	0.315462	tree	levee_1000	levee	s1000
pom	0.344266	tree	levee_1000	levee	s1000
slas	0.46445	tree	levee_1000	levee	s1000
swiet	0.41594	tree	levee_1000	levee	s1000
warm	0.344988	tree	levee_1000	levee	s1000
wielko	0.299235	tree	levee_1000	levee	s1000
zachpom	0.417079	tree	levee_1000	levee	s1000
dolno	0.187191	grass	levee_1000	levee	s1000
kujaw	0.162149	grass	levee_1000	levee	s1000
lubel	0.231839	grass	levee_1000	levee	s1000
lubu	0.23454	grass	levee_1000	levee	s1000
lodz	0.251823	grass	levee_1000	levee	s1000
malo	0.223263	grass	levee_1000	levee	s1000
maz	0.271464	grass	levee_1000	levee	s1000
opol	0.130344	grass	levee_1000	levee	s1000
podk	0.230091	grass	levee_1000	levee	s1000
podl	0.33912	grass	levee_1000	levee	s1000
pom	0.20827	grass	levee_1000	levee	s1000
slas	0.190387	grass	levee_1000	levee	s1000
swiet	0.287172	grass	levee_1000	levee	s1000
warm	0.275594	grass	levee_1000	levee	s1000
wielko	0.202547	grass	levee_1000	levee	s1000
zachpom	0.228046	grass	levee_1000	levee	s1000
dolno	0.379133	crop	levee_1000	levee	s1000
kujaw	0.437127	crop	levee_1000	levee	s1000
lubel	0.337774	crop	levee_1000	levee	s1000
lubu	0.181537	crop	levee_1000	levee	s1000
lodz	0.326699	crop	levee_1000	levee	s1000
malo	0.279172	crop	levee_1000	levee	s1000
maz	0.225364	crop	levee_1000	levee	s1000
opol	0.426131	crop	levee_1000	levee	s1000
podk	0.267813	crop	levee_1000	levee	s1000
podl	0.262529	crop	levee_1000	levee	s1000
pom	0.335453	crop	levee_1000	levee	s1000
slas	0.219924	crop	levee_1000	levee	s1000
swiet	0.230094	crop	levee_1000	levee	s1000
warm	0.295005	crop	levee_1000	levee	s1000
wielko	0.421103	crop	levee_1000	levee	s1000
zachpom	0.227649	crop	levee_1000	levee	s1000
dolno	0.0413942	built	levee_1000	levee	s1000
kujaw	0.0541294	built	levee_1000	levee	s1000
lubel	0.0413613	built	levee_1000	levee	s1000
lubu	0.0291336	built	levee_1000	levee	s1000
lodz	0.0521325	built	levee_1000	levee	s1000
malo	0.067699	built	levee_1000	levee	s1000
maz	0.0633297	built	levee_1000	levee	s1000
opol	0.0412632	built	levee_1000	levee	s1000
podk	0.0475466	built	levee_1000	levee	s1000
podl	0.0488202	built	levee_1000	levee	s1000
pom	0.0537941	built	levee_1000	levee	s1000
slas	0.0908797	built	levee_1000	levee	s1000
swiet	0.0408505	built	levee_1000	levee	s1000
warm	0.0293094	built	levee_1000	levee	s1000
wielko	0.0522656	built	levee_1000	levee	s1000
zachpom	0.0351491	built	levee_1000	levee	s1000
dolno	0.00237113	bare	levee_1000	levee	s1000
kujaw	0.00106501	bare	levee_1000	levee	s1000
lubel	0.00103718	bare	levee_1000	levee	s1000
lubu	0.000785538	bare	levee_1000	levee	s1000
lodz	0.00167051	bare	levee_1000	levee	s1000
malo	0.00249783	bare	levee_1000	levee	s1000
maz	0.00158385	bare	levee_1000	levee	s1000
opol	0.00111424	bare	levee_1000	levee	s1000
podk	0.000758183	bare	levee_1000	levee	s1000
podl	0.00124211	bare	levee_1000	levee	s1000
pom	0.00186831	bare	levee_1000	levee	s1000
slas	0.00292676	bare	levee_1000	levee	s1000
swiet	0.00164791	bare	levee_1000	levee	s1000
warm	0.0013719	bare	levee_1000	levee	s1000
wielko	0.00132593	bare	levee_1000	levee	s1000
zachpom	0.00143396	bare	levee_1000	levee	s1000
dolno	0.015332	water	levee_1000	levee	s1000
kujaw	0.0410332	water	levee_1000	levee	s1000
lubel	0.0284139	water	levee_1000	levee	s1000
lubu	0.023501	water	levee_1000	levee	s1000
lodz	0.012802	water	levee_1000	levee	s1000
malo	0.0233309	water	levee_1000	levee	s1000
maz	0.0292222	water	levee_1000	levee	s1000
opol	0.0234886	water	levee_1000	levee	s1000
podk	0.0175263	water	levee_1000	levee	s1000
podl	0.0173161	water	levee_1000	levee	s1000
pom	0.0442345	water	levee_1000	levee	s1000
slas	0.0289299	water	levee_1000	levee	s1000
swiet	0.020161	water	levee_1000	levee	s1000
warm	0.0399483	water	levee_1000	levee	s1000
wielko	0.0200788	water	levee_1000	levee	s1000
zachpom	0.0634192	water	levee_1000	levee	s1000
dolno	0.00371052	wetland	levee_1000	levee	s1000
kujaw	0.00432575	wetland	levee_1000	levee	s1000
lubel	0.0123528	wetland	levee_1000	levee	s1000
lubu	0.00445517	wetland	levee_1000	levee	s1000
lodz	0.00424743	wetland	levee_1000	levee	s1000
malo	0.00143539	wetland	levee_1000	levee	s1000
maz	0.0054178	wetland	levee_1000	levee	s1000
opol	0.00266175	wetland	levee_1000	levee	s1000
podk	0.00234132	wetland	levee_1000	levee	s1000
podl	0.01551	wetland	levee_1000	levee	s1000
pom	0.0121127	wetland	levee_1000	levee	s1000
slas	0.00250339	wetland	levee_1000	levee	s1000
swiet	0.00413482	wetland	levee_1000	levee	s1000
warm	0.0137823	wetland	levee_1000	levee	s1000
wielko	0.00344507	wetland	levee_1000	levee	s1000
zachpom	0.0272231	wetland	levee_1000	levee	s1000

## Sheet: point_level
voivodeship	cover	land	lls_scale	lls	scale	ID	ID_site
dolno	0.587038	tree	highway_250	highway	s250	1	site_1
dolno	0.0558621	tree	highway_250	highway	s250	2	site_2
dolno	0.275023	tree	highway_250	highway	s250	3	site_3
dolno	0	tree	highway_250	highway	s250	4	site_4
dolno	0.0821567	tree	highway_250	highway	s250	5	site_5
dolno	0.00218053	tree	highway_250	highway	s250	6	site_6
dolno	0.408522	tree	highway_250	highway	s250	7	site_7
dolno	1.17151e-05	tree	highway_250	highway	s250	8	site_8
dolno	0.808727	tree	highway_250	highway	s250	9	site_9
dolno	0.789762	tree	highway_250	highway	s250	10	site_10
dolno	0.109178	tree	highway_250	highway	s250	11	site_11
dolno	0.383768	tree	highway_250	highway	s250	12	site_12
dolno	0.153205	tree	highway_250	highway	s250	13	site_13
dolno	0.00082425	tree	highway_250	highway	s250	14	site_14
dolno	0.00678928	tree	highway_250	highway	s250	15	site_15
dolno	0	tree	highway_250	highway	s250	16	site_16
dolno	0.191142	tree	highway_250	highway	s250	17	site_17
dolno	0.0209953	tree	highway_250	highway	s250	18	site_18
dolno	0.206177	tree	highway_250	highway	s250	19	site_19
dolno	0.19071	tree	highway_250	highway	s250	20	site_20
dolno	0.343299	tree	highway_250	highway	s250	21	site_21
dolno	0.11864	tree	highway_250	highway	s250	22	site_22
dolno	0	tree	highway_250	highway	s250	23	site_23
dolno	0.0430206	tree	highway_250	highway	s250	24	site_24
dolno	0.26969	tree	highway_250	highway	s250	25	site_25
dolno	0.41782	tree	highway_250	highway	s250	26	site_26
dolno	0.00476307	tree	highway_250	highway	s250	27	site_27
dolno	0.844196	tree	highway_250	highway	s250	28	site_28
dolno	0	tree	highway_250	highway	s250	29	site_29
dolno	0.0762012	tree	highway_250	highway	s250	30	site_30
dolno	0.213977	tree	highway_250	highway	s250	31	site_31
dolno	0	tree	highway_250	highway	s250	32	site_32
dolno	0	tree	highway_250	highway	s250	33	site_33
dolno	0.0868024	tree	highway_250	highway	s250	34	site_34
dolno	0	tree	highway_250	highway	s250	35	site_35
dolno	0.0926733	tree	highway_250	highway	s250	36	site_36
dolno	0.00883404	tree	highway_250	highway	s250	37	site_37
dolno	0	tree	highway_250	highway	s250	38	site_38
dolno	0.160304	tree	highway_250	highway	s250	39	site_39
dolno	0.732074	tree	highway_250	highway	s250	40	site_40
dolno	0.164466	tree	highway_250	highway	s250	41	site_41
dolno	0.0173918	tree	highway_250	highway	s250	42	site_42
dolno	0.0598392	tree	highway_250	highway	s250	43	site_43
dolno	0	tree	highway_250	highway	s250	44	site_44
dolno	0.149733	tree	highway_250	highway	s250	45	site_45
dolno	0.00717081	tree	highway_250	highway	s250	46	site_46
dolno	0.0302801	tree	highway_250	highway	s250	47	site_47
dolno	0.720421	tree	highway_250	highway	s250	48	site_48
dolno	0.787575	tree	highway_250	highway	s250	49	site_49
dolno	0.104614	tree	highway_250	highway	s250	50	site_50
dolno	0.0864233	tree	highway_250	highway	s250	51	site_51
dolno	0	tree	highway_250	highway	s250	52	site_52
dolno	0.00164763	tree	highway_250	highway	s250	53	site_53
dolno	0.294814	tree	highway_250	highway	s250	54	site_54
dolno	0.123926	tree	highway_250	highway	s250	55	site_55
dolno	0	tree	highway_250	highway	s250	56	site_56
dolno	0	tree	highway_250	highway	s250	57	site_57
kujaw	0.0630428	tree	highway_250	highway	s250	58	site_58
kujaw	0	tree	highway_250	highway	s250	59	site_59
kujaw	0.242836	tree	highway_250	highway	s250	60	site_60
kujaw	0.0338967	tree	highway_250	highway	s250	61	site_61
kujaw	0.117651	tree	highway_250	highway	s250	62	site_62
kujaw	0.256005	tree	highway_250	highway	s250	63	site_63
kujaw	0.193695	tree	highway_250	highway	s250	64	site_64
kujaw	0	tree	highway_250	highway	s250	65	site_65
kujaw	0.240221	tree	highway_250	highway	s250	66	site_66
kujaw	0.0715875	tree	highway_250	highway	s250	67	site_67
kujaw	0.0163511	tree	highway_250	highway	s250	68	site_68
kujaw	0	tree	highway_250	highway	s250	69	site_69
kujaw	0.636833	tree	highway_250	highway	s250	70	site_70
kujaw	0	tree	highway_250	highway	s250	71	site_71
kujaw	0.00297691	tree	highway_250	highway	s250	72	site_72
kujaw	0.108065	tree	highway_250	highway	s250	73	site_73
kujaw	0.223438	tree	highway_250	highway	s250	74	site_74
kujaw	0.0194876	tree	highway_250	highway	s250	75	site_75
kujaw	0.396937	tree	highway_250	highway	s250	76	site_76
kujaw	0	tree	highway_250	highway	s250	77	site_77
kujaw	0.00157451	tree	highway_250	highway	s250	78	site_78
kujaw	0.0177038	tree	highway_250	highway	s250	79	site_79
kujaw	0.524342	tree	highway_250	highway	s250	80	site_80
kujaw	0.0942621	tree	highway_250	highway	s250	81	site_81
kujaw	0.0566679	tree	highway_250	highway	s250	82	site_82
kujaw	0.801756	tree	highway_250	highway	s250	83	site_83
kujaw	0.512042	tree	highway_250	highway	s250	84	site_84
kujaw	0.00105049	tree	highway_250	highway	s250	85	site_85
kujaw	0.195585	tree	highway_250	highway	s250	86	site_86
kujaw	0.220261	tree	highway_250	highway	s250	87	site_87
kujaw	0.0520079	tree	highway_250	highway	s250	88	site_88
kujaw	0.000370236	tree	highway_250	highway	s250	89	site_89
kujaw	0.790331	tree	highway_250	highway	s250	90	site_90
lubel	0.327374	tree	highway_250	highway	s250	91	site_91
lubel	0.0720165	tree	highway_250	highway	s250	92	site_92
lubel	0.276374	tree	highway_250	highway	s250	93	site_93
lubel	0.00025639	tree	highway_250	highway	s250	94	site_94
lubel	0.10791	tree	highway_250	highway	s250	95	site_95
lubel	0.0500502	tree	highway_250	highway	s250	96	site_96
lubel	0.13056	tree	highway_250	highway	s250	97	site_97
lubel	0.0352344	tree	highway_250	highway	s250	98	site_98
lubel	0	tree	highway_250	highway	s250	99	site_99
lubel	0.340101	tree	highway_250	highway	s250	100	site_100
lubel	0.00273358	tree	highway_250	highway	s250	101	site_101
lubel	0.217778	tree	highway_250	highway	s250	102	site_102
lubel	0	tree	highway_250	highway	s250	103	site_103
lubel	0.387504	tree	highway_250	highway	s250	104	site_104
lubel	0.0558098	tree	highway_250	highway	s250	105	site_105
lubel	0.0162461	tree	highway_250	highway	s250	106	site_106
lubel	0.0121225	tree	highway_250	highway	s250	107	site_107
lubel	0.0384742	tree	highway_250	highway	s250	108	site_108
lubel	0.0747321	tree	highway_250	highway	s250	109	site_109
lubel	0.0738676	tree	highway_250	highway	s250	110	site_110
lubel	0.00575954	tree	highway_250	highway	s250	111	site_111
lubel	0.396011	tree	highway_250	highway	s250	112	site_112
lubel	0.0206621	tree	highway_250	highway	s250	113	site_113
lubel	0.0554421	tree	highway_250	highway	s250	114	site_114
lubel	0	tree	highway_250	highway	s250	115	site_115
lubu	0.679121	tree	highway_250	highway	s250	116	site_116
lubu	0.742153	tree	highway_250	highway	s250	117	site_117
lubu	0.822454	tree	highway_250	highway	s250	118	site_118
lubu	0.0844505	tree	highway_250	highway	s250	119	site_119
lubu	0.882176	tree	highway_250	highway	s250	120	site_120
lubu	0.409378	tree	highway_250	highway	s250	121	site_121
lubu	0.57385	tree	highway_250	highway	s250	122	site_122
lubu	0.00806218	tree	highway_250	highway	s250	123	site_123
lubu	0.673338	tree	highway_250	highway	s250	124	site_124
lubu	0.785013	tree	highway_250	highway	s250	125	site_125
lubu	0.325212	tree	highway_250	highway	s250	126	site_126
lubu	0.789528	tree	highway_250	highway	s250	127	site_127
lubu	0.506284	tree	highway_250	highway	s250	128	site_128
lubu	0.72989	tree	highway_250	highway	s250	129	site_129
lubu	0.412766	tree	highway_250	highway	s250	130	site_130
lubu	0.144157	tree	highway_250	highway	s250	131	site_131
lubu	0.232813	tree	highway_250	highway	s250	132	site_132
lubu	0.606856	tree	highway_250	highway	s250	133	site_133
lubu	0.617875	tree	highway_250	highway	s250	134	site_134
lubu	0.753618	tree	highway_250	highway	s250	135	site_135
lubu	0.830128	tree	highway_250	highway	s250	136	site_136
lubu	0.00643827	tree	highway_250	highway	s250	137	site_137
lubu	0	tree	highway_250	highway	s250	138	site_138
lubu	0.299858	tree	highway_250	highway	s250	139	site_139
lubu	0.00265924	tree	highway_250	highway	s250	140	site_140
lubu	0.831379	tree	highway_250	highway	s250	141	site_141
lubu	0.172591	tree	highway_250	highway	s250	142	site_142
lubu	0.277557	tree	highway_250	highway	s250	143	site_143
lubu	0.75994	tree	highway_250	highway	s250	144	site_144
lubu	0.694999	tree	highway_250	highway	s250	145	site_145
lubu	0.846554	tree	highway_250	highway	s250	146	site_146
lodz	0.0556351	tree	highway_250	highway	s250	147	site_147
lodz	0.0211637	tree	highway_250	highway	s250	148	site_148
lodz	0.105059	tree	highway_250	highway	s250	149	site_149
lodz	0.106843	tree	highway_250	highway	s250	150	site_150
lodz	0.129149	tree	highway_250	highway	s250	151	site_151
lodz	0	tree	highway_250	highway	s250	152	site_152
lodz	0	tree	highway_250	highway	s250	153	site_153
lodz	0.203312	tree	highway_250	highway	s250	154	site_154
lodz	0.0311283	tree	highway_250	highway	s250	155	site_155
lodz	0.230626	tree	highway_250	highway	s250	156	site_156
lodz	0	tree	highway_250	highway	s250	157	site_157
lodz	0.0120038	tree	highway_250	highway	s250	158	site_158
lodz	0.00409756	tree	highway_250	highway	s250	159	site_159
lodz	0.391613	tree	highway_250	highway	s250	160	site_160
lodz	0.455919	tree	highway_250	highway	s250	161	site_161
lodz	0.132344	tree	highway_250	highway	s250	162	site_162
lodz	0.220059	tree	highway_250	highway	s250	163	site_163
lodz	0.0733055	tree	highway_250	highway	s250	164	site_164
lodz	0.165049	tree	highway_250	highway	s250	165	site_165
lodz	0.162797	tree	highway_250	highway	s250	166	site_166
lodz	0.39509	tree	highway_250	highway	s250	167	site_167
lodz	0	tree	highway_250	highway	s250	168	site_168
lodz	0.0120478	tree	highway_250	highway	s250	169	site_169
lodz	0.148351	tree	highway_250	highway	s250	170	site_170
lodz	0.378825	tree	highway_250	highway	s250	171	site_171
lodz	0.359771	tree	highway_250	highway	s250	172	site_172
lodz	0.103284	tree	highway_250	highway	s250	173	site_173
lodz	0.114639	tree	highway_250	highway	s250	174	site_174
lodz	0.00739129	tree	highway_250	highway	s250	175	site_175
lodz	0.395196	tree	highway_250	highway	s250	176	site_176
lodz	0.619371	tree	highway_250	highway	s250	177	site_177
lodz	0.494986	tree	highway_250	highway	s250	178	site_178
lodz	0.0026558	tree	highway_250	highway	s250	179	site_179
lodz	0.205108	tree	highway_250	highway	s250	180	site_180
lodz	0.179533	tree	highway_250	highway	s250	181	site_181
lodz	0.215965	tree	highway_250	highway	s250	182	site_182
lodz	0.0769142	tree	highway_250	highway	s250	183	site_183
lodz	0.743922	tree	highway_250	highway	s250	184	site_184
lodz	0.636903	tree	highway_250	highway	s250	185	site_185
lodz	0.0103773	tree	highway_250	highway	s250	186	site_186
lodz	0.3273	tree	highway_250	highway	s250	187	site_187
lodz	0.2581	tree	highway_250	highway	s250	188	site_188
lodz	0.778905	tree	highway_250	highway	s250	189	site_189
lodz	0.0178491	tree	highway_250	highway	s250	190	site_190
lodz	0.595948	tree	highway_250	highway	s250	191	site_191
lodz	0.077295	tree	highway_250	highway	s250	192	site_192
lodz	0.0226445	tree	highway_250	highway	s250	193	site_193
lodz	0.0508295	tree	highway_250	highway	s250	194	site_194
lodz	0.0106998	tree	highway_250	highway	s250	195	site_195
lodz	0.0921349	tree	highway_250	highway	s250	196	site_196
lodz	0.406296	tree	highway_250	highway	s250	197	site_197
lodz	0.414735	tree	highway_250	highway	s250	198	site_198
lodz	0.0381288	tree	highway_250	highway	s250	199	site_199
lodz	0.175943	tree	highway_250	highway	s250	200	site_200
lodz	0	tree	highway_250	highway	s250	201	site_201
lodz	0.0485163	tree	highway_250	highway	s250	202	site_202
malo	0.218265	tree	highway_250	highway	s250	203	site_203
malo	0.353237	tree	highway_250	highway	s250	204	site_204
malo	0.15465	tree	highway_250	highway	s250	205	site_205
malo	0.5016	tree	highway_250	highway	s250	206	site_206
malo	0.259426	tree	highway_250	highway	s250	207	site_207
malo	0.337399	tree	highway_250	highway	s250	208	site_208
malo	0.584978	tree	highway_250	highway	s250	209	site_209
malo	0.000844877	tree	highway_250	highway	s250	210	site_210
malo	0.500509	tree	highway_250	highway	s250	211	site_211
malo	0.757338	tree	highway_250	highway	s250	212	site_212
malo	0.121236	tree	highway_250	highway	s250	213	site_213
malo	0.0425385	tree	highway_250	highway	s250	214	site_214
malo	0.243537	tree	highway_250	highway	s250	215	site_215
malo	0.29988	tree	highway_250	highway	s250	216	site_216
malo	0.13686	tree	highway_250	highway	s250	217	site_217
malo	0.493732	tree	highway_250	highway	s250	218	site_218
malo	0.364748	tree	highway_250	highway	s250	219	site_219
malo	0.199469	tree	highway_250	highway	s250	220	site_220
malo	0.0234641	tree	highway_250	highway	s250	221	site_221
malo	0.129076	tree	highway_250	highway	s250	222	site_222
malo	0.650935	tree	highway_250	highway	s250	223	site_223
malo	0.344364	tree	highway_250	highway	s250	224	site_224
malo	0.660031	tree	highway_250	highway	s250	225	site_225
malo	0.076945	tree	highway_250	highway	s250	226	site_226
malo	0.808235	tree	highway_250	highway	s250	227	site_227
maz	0.0422026	tree	highway_250	highway	s250	228	site_228
maz	0.146119	tree	highway_250	highway	s250	229	site_229
maz	0.855894	tree	highway_250	highway	s250	230	site_230
maz	0.276061	tree	highway_250	highway	s250	231	site_231
maz	0.0710093	tree	highway_250	highway	s250	232	site_232
maz	0.247266	tree	highway_250	highway	s250	233	site_233
maz	0.231358	tree	highway_250	highway	s250	234	site_234
maz	0.230249	tree	highway_250	highway	s250	235	site_235
maz	0.00570093	tree	highway_250	highway	s250	236	site_236
maz	0.3349	tree	highway_250	highway	s250	237	site_237
maz	0.0473417	tree	highway_250	highway	s250	238	site_238
maz	0.646688	tree	highway_250	highway	s250	239	site_239
maz	0.401648	tree	highway_250	highway	s250	240	site_240
maz	0.196031	tree	highway_250	highway	s250	241	site_241
maz	0.747037	tree	highway_250	highway	s250	242	site_242
maz	0.0408333	tree	highway_250	highway	s250	243	site_243
maz	0.769278	tree	highway_250	highway	s250	244	site_244
maz	0.323493	tree	highway_250	highway	s250	245	site_245
maz	0.0621665	tree	highway_250	highway	s250	246	site_246
maz	0.213662	tree	highway_250	highway	s250	247	site_247
maz	0.271441	tree	highway_250	highway	s250	248	site_248
maz	0.00211499	tree	highway_250	highway	s250	249	site_249
maz	0.256985	tree	highway_250	highway	s250	250	site_250
maz	0.196729	tree	highway_250	highway	s250	251	site_251
maz	0.38915	tree	highway_250	highway	s250	252	site_252
maz	0.478999	tree	highway_250	highway	s250	253	site_253
maz	0.727635	tree	highway_250	highway	s250	254	site_254
maz	0.00179672	tree	highway_250	highway	s250	255	site_255
maz	0.31557	tree	highway_250	highway	s250	256	site_256
maz	0.0570338	tree	highway_250	highway	s250	257	site_257
maz	0.444488	tree	highway_250	highway	s250	258	site_258
maz	0.382515	tree	highway_250	highway	s250	259	site_259
maz	0	tree	highway_250	highway	s250	260	site_260
maz	0.296481	tree	highway_250	highway	s250	261	site_261
maz	1	tree	highway_250	highway	s250	262	site_262
maz	0.0443004	tree	highway_250	highway	s250	263	site_263
maz	0.240461	tree	highway_250	highway	s250	264	site_264
maz	0.566174	tree	highway_250	highway	s250	265	site_265
maz	0.0187357	tree	highway_250	highway	s250	266	site_266
maz	0.305352	tree	highway_250	highway	s250	267	site_267
maz	0.211743	tree	highway_250	highway	s250	268	site_268
maz	0.171152	tree	highway_250	highway	s250	269	site_269
maz	0.0603077	tree	highway_250	highway	s250	270	site_270
maz	0.126941	tree	highway_250	highway	s250	271	site_271
maz	0.676749	tree	highway_250	highway	s250	272	site_272
maz	0.193598	tree	highway_250	highway	s250	273	site_273
maz	0.526082	tree	highway_250	highway	s250	274	site_274
maz	0.538875	tree	highway_250	highway	s250	275	site_275
maz	0.363382	tree	highway_250	highway	s250	276	site_276
maz	0.0465258	tree	highway_250	highway	s250	277	site_277
maz	0.770224	tree	highway_250	highway	s250	278	site_278
maz	0.37985	tree	highway_250	highway	s250	279	site_279
maz	0.352885	tree	highway_250	highway	s250	280	site_280
maz	0.109069	tree	highway_250	highway	s250	281	site_281
maz	0.422	tree	highway_250	highway	s250	282	site_282
maz	0.325092	tree	highway_250	highway	s250	283	site_283
maz	0.62335	tree	highway_250	highway	s250	284	site_284
maz	0.287612	tree	highway_250	highway	s250	285	site_285
maz	0.000788873	tree	highway_250	highway	s250	286	site_286
maz	0.324868	tree	highway_250	highway	s250	287	site_287
maz	0.499664	tree	highway_250	highway	s250	288	site_288
maz	0.691792	tree	highway_250	highway	s250	289	site_289
maz	0.000538934	tree	highway_250	highway	s250	290	site_290
maz	0.437011	tree	highway_250	highway	s250	291	site_291
maz	0.0104453	tree	highway_250	highway	s250	292	site_292
maz	0.0454335	tree	highway_250	highway	s250	293	site_293
maz	0.7479	tree	highway_250	highway	s250	294	site_294
maz	0.115714	tree	highway_250	highway	s250	295	site_295
maz	0.784471	tree	highway_250	highway	s250	296	site_296
maz	0.0177081	tree	highway_250	highway	s250	297	site_297
maz	0.408855	tree	highway_250	highway	s250	298	site_298
maz	0.0104397	tree	highway_250	highway	s250	299	site_299
maz	0.118046	tree	highway_250	highway	s250	300	site_300
opol	0.0479798	tree	highway_250	highway	s250	301	site_301
opol	0.180321	tree	highway_250	highway	s250	302	site_302
opol	0.380284	tree	highway_250	highway	s250	303	site_303
opol	0.801316	tree	highway_250	highway	s250	304	site_304
opol	0.0396245	tree	highway_250	highway	s250	305	site_305
opol	0.084488	tree	highway_250	highway	s250	306	site_306
opol	0.89754	tree	highway_250	highway	s250	307	site_307
opol	0.153128	tree	highway_250	highway	s250	308	site_308
opol	0.488315	tree	highway_250	highway	s250	309	site_309
opol	0.000347365	tree	highway_250	highway	s250	310	site_310
opol	0	tree	highway_250	highway	s250	311	site_311
podk	0.0472269	tree	highway_250	highway	s250	312	site_312
podk	0.315972	tree	highway_250	highway	s250	313	site_313
podk	0.0859799	tree	highway_250	highway	s250	314	site_314
podk	0.21337	tree	highway_250	highway	s250	315	site_315
podk	0.630326	tree	highway_250	highway	s250	316	site_316
podk	0.611984	tree	highway_250	highway	s250	317	site_317
podk	0.00315951	tree	highway_250	highway	s250	318	site_318
podk	0.112557	tree	highway_250	highway	s250	319	site_319
podk	0.000560872	tree	highway_250	highway	s250	320	site_320
podk	0.0926485	tree	highway_250	highway	s250	321	site_321
podk	0.502928	tree	highway_250	highway	s250	322	site_322
podk	0.172105	tree	highway_250	highway	s250	323	site_323
podk	0.014095	tree	highway_250	highway	s250	324	site_324
podk	0.348759	tree	highway_250	highway	s250	325	site_325
podk	0	tree	highway_250	highway	s250	326	site_326
podk	0.198164	tree	highway_250	highway	s250	327	site_327
podk	0.28648	tree	highway_250	highway	s250	328	site_328
podk	0.255648	tree	highway_250	highway	s250	329	site_329
podk	0.0919817	tree	highway_250	highway	s250	330	site_330
podk	0	tree	highway_250	highway	s250	331	site_331
podk	0.15929	tree	highway_250	highway	s250	332	site_332
podk	0.168108	tree	highway_250	highway	s250	333	site_333
podk	0.77235	tree	highway_250	highway	s250	334	site_334
podk	0.019779	tree	highway_250	highway	s250	335	site_335
podk	0.0821454	tree	highway_250	highway	s250	336	site_336
podk	0.393142	tree	highway_250	highway	s250	337	site_337
podk	0.393876	tree	highway_250	highway	s250	338	site_338
podl	0.557265	tree	highway_250	highway	s250	339	site_339
podl	0.0215472	tree	highway_250	highway	s250	340	site_340
podl	0.00992028	tree	highway_250	highway	s250	341	site_341
podl	0.0296293	tree	highway_250	highway	s250	342	site_342
podl	0	tree	highway_250	highway	s250	343	site_343
podl	0	tree	highway_250	highway	s250	344	site_344
podl	0.52572	tree	highway_250	highway	s250	345	site_345
podl	0	tree	highway_250	highway	s250	346	site_346
podl	0.0899224	tree	highway_250	highway	s250	347	site_347
podl	0.0105134	tree	highway_250	highway	s250	348	site_348
podl	0.122362	tree	highway_250	highway	s250	349	site_349
podl	0.0178034	tree	highway_250	highway	s250	350	site_350
podl	0.278402	tree	highway_250	highway	s250	351	site_351
podl	0.00290227	tree	highway_250	highway	s250	352	site_352
podl	0.0286629	tree	highway_250	highway	s250	353	site_353
podl	0.370875	tree	highway_250	highway	s250	354	site_354
podl	0.00158463	tree	highway_250	highway	s250	355	site_355
podl	0.0870663	tree	highway_250	highway	s250	356	site_356
podl	0.0766694	tree	highway_250	highway	s250	357	site_357
podl	0.0792253	tree	highway_250	highway	s250	358	site_358
podl	0.337654	tree	highway_250	highway	s250	359	site_359
podl	0.0557497	tree	highway_250	highway	s250	360	site_360
podl	0.0835225	tree	highway_250	highway	s250	361	site_361
podl	0	tree	highway_250	highway	s250	362	site_362
podl	0.680078	tree	highway_250	highway	s250	363	site_363
podl	0.331518	tree	highway_250	highway	s250	364	site_364
pom	0.0367085	tree	highway_250	highway	s250	365	site_365
pom	0.0456842	tree	highway_250	highway	s250	366	site_366
pom	0.0619641	tree	highway_250	highway	s250	367	site_367
pom	0.00130013	tree	highway_250	highway	s250	368	site_368
pom	0.0372525	tree	highway_250	highway	s250	369	site_369
pom	0.857753	tree	highway_250	highway	s250	370	site_370
pom	0.0357744	tree	highway_250	highway	s250	371	site_371
pom	0.755802	tree	highway_250	highway	s250	372	site_372
pom	0.389	tree	highway_250	highway	s250	373	site_373
pom	0.297593	tree	highway_250	highway	s250	374	site_374
pom	0	tree	highway_250	highway	s250	375	site_375
pom	0	tree	highway_250	highway	s250	376	site_376
pom	0.00488631	tree	highway_250	highway	s250	377	site_377
pom	0	tree	highway_250	highway	s250	378	site_378
pom	0.30794	tree	highway_250	highway	s250	379	site_379
pom	0.0114183	tree	highway_250	highway	s250	380	site_380
pom	0.484274	tree	highway_250	highway	s250	381	site_381
pom	0	tree	highway_250	highway	s250	382	site_382
pom	0.39656	tree	highway_250	highway	s250	383	site_383
pom	0.901459	tree	highway_250	highway	s250	384	site_384
slas	0.276952	tree	highway_250	highway	s250	385	site_385
slas	0.239303	tree	highway_250	highway	s250	386	site_386
slas	0.237407	tree	highway_250	highway	s250	387	site_387
slas	0.718345	tree	highway_250	highway	s250	388	site_388
slas	0.139702	tree	highway_250	highway	s250	389	site_389
slas	0.64404	tree	highway_250	highway	s250	390	site_390
slas	0.469286	tree	highway_250	highway	s250	391	site_391
slas	0.0554421	tree	highway_250	highway	s250	392	site_392
slas	0.0180118	tree	highway_250	highway	s250	393	site_393
slas	0.0712895	tree	highway_250	highway	s250	394	site_394
slas	0.243786	tree	highway_250	highway	s250	395	site_395
slas	0.0588373	tree	highway_250	highway	s250	396	site_396
slas	0.054577	tree	highway_250	highway	s250	397	site_397
slas	0.0641216	tree	highway_250	highway	s250	398	site_398
slas	0.208544	tree	highway_250	highway	s250	399	site_399
slas	0.539923	tree	highway_250	highway	s250	400	site_400
slas	0.651439	tree	highway_250	highway	s250	401	site_401
slas	0.464011	tree	highway_250	highway	s250	402	site_402
slas	0.272596	tree	highway_250	highway	s250	403	site_403
slas	0.85905	tree	highway_250	highway	s250	404	site_404
slas	0.116455	tree	highway_250	highway	s250	405	site_405
slas	0.389275	tree	highway_250	highway	s250	406	site_406
slas	0.398392	tree	highway_250	highway	s250	407	site_407
slas	0.6544	tree	highway_250	highway	s250	408	site_408
slas	0.0698319	tree	highway_250	highway	s250	409	site_409
slas	0.282416	tree	highway_250	highway	s250	410	site_410
slas	0.457627	tree	highway_250	highway	s250	411	site_411
slas	0.687317	tree	highway_250	highway	s250	412	site_412
slas	0.284043	tree	highway_250	highway	s250	413	site_413
slas	0.0686608	tree	highway_250	highway	s250	414	site_414
slas	0.409942	tree	highway_250	highway	s250	415	site_415
slas	0.599373	tree	highway_250	highway	s250	416	site_416
slas	0.362244	tree	highway_250	highway	s250	417	site_417
slas	0.194015	tree	highway_250	highway	s250	418	site_418
slas	0.847265	tree	highway_250	highway	s250	419	site_419
slas	0.144701	tree	highway_250	highway	s250	420	site_420
slas	0.339856	tree	highway_250	highway	s250	421	site_421
slas	0.552829	tree	highway_250	highway	s250	422	site_422
slas	0.215277	tree	highway_250	highway	s250	423	site_423
slas	0.0133596	tree	highway_250	highway	s250	424	site_424
slas	0.0197794	tree	highway_250	highway	s250	425	site_425
slas	0.385442	tree	highway_250	highway	s250	426	site_426
slas	0.229607	tree	highway_250	highway	s250	427	site_427
slas	0.471107	tree	highway_250	highway	s250	428	site_428
slas	0.287611	tree	highway_250	highway	s250	429	site_429
slas	0.06231	tree	highway_250	highway	s250	430	site_430
swiet	0.485599	tree	highway_250	highway	s250	431	site_431
swiet	0.769242	tree	highway_250	highway	s250	432	site_432
swiet	0.0337727	tree	highway_250	highway	s250	433	site_433
swiet	0.78039	tree	highway_250	highway	s250	434	site_434
swiet	0	tree	highway_250	highway	s250	435	site_435
swiet	0.146078	tree	highway_250	highway	s250	436	site_436
swiet	0.458547	tree	highway_250	highway	s250	437	site_437
swiet	0.178013	tree	highway_250	highway	s250	438	site_438
swiet	0.275202	tree	highway_250	highway	s250	439	site_439
swiet	0.101897	tree	highway_250	highway	s250	440	site_440
swiet	0.687254	tree	highway_250	highway	s250	441	site_441
swiet	0.00584935	tree	highway_250	highway	s250	442	site_442
warm	0.942631	tree	highway_250	highway	s250	443	site_443
warm	0	tree	highway_250	highway	s250	444	site_444
warm	0.12529	tree	highway_250	highway	s250	445	site_445
warm	0.00356482	tree	highway_250	highway	s250	446	site_446
warm	0.254801	tree	highway_250	highway	s250	447	site_447
warm	0.00286309	tree	highway_250	highway	s250	448	site_448
warm	0.890684	tree	highway_250	highway	s250	449	site_449
warm	0.0867478	tree	highway_250	highway	s250	450	site_450
warm	0.355754	tree	highway_250	highway	s250	451	site_451
warm	0.596402	tree	highway_250	highway	s250	452	site_452
warm	0.396985	tree	highway_250	highway	s250	453	site_453
warm	0.000259141	tree	highway_250	highway	s250	454	site_454
warm	0.295531	tree	highway_250	highway	s250	455	site_455
warm	0.0457077	tree	highway_250	highway	s250	456	site_456
warm	0.0532576	tree	highway_250	highway	s250	457	site_457
warm	0.223918	tree	highway_250	highway	s250	458	site_458
warm	0.0465428	tree	highway_250	highway	s250	459	site_459
warm	0.393643	tree	highway_250	highway	s250	460	site_460
warm	0.0536042	tree	highway_250	highway	s250	461	site_461
warm	0.200629	tree	highway_250	highway	s250	462	site_462
warm	0.607143	tree	highway_250	highway	s250	463	site_463
warm	0.584448	tree	highway_250	highway	s250	464	site_464
warm	0.0510838	tree	highway_250	highway	s250	465	site_465
warm	0.703627	tree	highway_250	highway	s250	466	site_466
warm	0.472208	tree	highway_250	highway	s250	467	site_467
warm	0.281041	tree	highway_250	highway	s250	468	site_468
warm	0.160788	tree	highway_250	highway	s250	469	site_469
warm	0.0978145	tree	highway_250	highway	s250	470	site_470
warm	0.580165	tree	highway_250	highway	s250	471	site_471
warm	0.725927	tree	highway_250	highway	s250	472	site_472
warm	0.128443	tree	highway_250	highway	s250	473	site_473
warm	0	tree	highway_250	highway	s250	474	site_474
warm	0.783424	tree	highway_250	highway	s250	475	site_475
warm	0.145831	tree	highway_250	highway	s250	476	site_476
warm	0.052925	tree	highway_250	highway	s250	477	site_477
wielko	0.0110507	tree	highway_250	highway	s250	478	site_478
wielko	0	tree	highway_250	highway	s250	479	site_479
wielko	0.00188969	tree	highway_250	highway	s250	480	site_480
wielko	0	tree	highway_250	highway	s250	481	site_481
wielko	0.39962	tree	highway_250	highway	s250	482	site_482
wielko	0.0365273	tree	highway_250	highway	s250	483	site_483
wielko	0	tree	highway_250	highway	s250	484	site_484
wielko	0.693553	tree	highway_250	highway	s250	485	site_485
wielko	0.301485	tree	highway_250	highway	s250	486	site_486
wielko	0.123007	tree	highway_250	highway	s250	487	site_487
wielko	0	tree	highway_250	highway	s250	488	site_488
wielko	0.0459013	tree	highway_250	highway	s250	489	site_489
wielko	0.0290052	tree	highway_250	highway	s250	490	site_490
wielko	0.0569356	tree	highway_250	highway	s250	491	site_491
wielko	0	tree	highway_250	highway	s250	492	site_492
wielko	0	tree	highway_250	highway	s250	493	site_493
wielko	0.122192	tree	highway_250	highway	s250	494	site_494
wielko	0.685088	tree	highway_250	highway	s250	495	site_495
wielko	0.0413772	tree	highway_250	highway	s250	496	site_496
wielko	0.583879	tree	highway_250	highway	s250	497	site_497
wielko	0.00350364	tree	highway_250	highway	s250	498	site_498
wielko	0.00109061	tree	highway_250	highway	s250	499	site_499
wielko	0	tree	highway_250	highway	s250	500	site_500
wielko	0	tree	highway_250	highway	s250	501	site_501
wielko	0	tree	highway_250	highway	s250	502	site_502
wielko	0.0729524	tree	highway_250	highway	s250	503	site_503
wielko	0.592779	tree	highway_250	highway	s250	504	site_504
wielko	0	tree	highway_250	highway	s250	505	site_505
wielko	0.164091	tree	highway_250	highway	s250	506	site_506
wielko	0.548797	tree	highway_250	highway	s250	507	site_507
wielko	0.372304	tree	highway_250	highway	s250	508	site_508
wielko	0.147408	tree	highway_250	highway	s250	509	site_509
wielko	0.185091	tree	highway_250	highway	s250	510	site_510
wielko	0.321312	tree	highway_250	highway	s250	511	site_511
wielko	0.000801375	tree	highway_250	highway	s250	512	site_512
wielko	0.0118276	tree	highway_250	highway	s250	513	site_513
wielko	0.247092	tree	highway_250	highway	s250	514	site_514
wielko	0	tree	highway_250	highway	s250	515	site_515
wielko	0	tree	highway_250	highway	s250	516	site_516
wielko	0.00205602	tree	highway_250	highway	s250	517	site_517
wielko	0.676602	tree	highway_250	highway	s250	518	site_518
wielko	0.0034834	tree	highway_250	highway	s250	519	site_519
wielko	0.0429136	tree	highway_250	highway	s250	520	site_520
wielko	0.0255251	tree	highway_250	highway	s250	521	site_521
wielko	0.00592858	tree	highway_250	highway	s250	522	site_522
wielko	0	tree	highway_250	highway	s250	523	site_523
wielko	0.416403	tree	highway_250	highway	s250	524	site_524
wielko	0	tree	highway_250	highway	s250	525	site_525
wielko	0.393633	tree	highway_250	highway	s250	526	site_526
wielko	0	tree	highway_250	highway	s250	527	site_527
wielko	0.387074	tree	highway_250	highway	s250	528	site_528
wielko	0.031399	tree	highway_250	highway	s250	529	site_529
wielko	0.0348451	tree	highway_250	highway	s250	530	site_530
wielko	0.00107182	tree	highway_250	highway	s250	531	site_531
wielko	0	tree	highway_250	highway	s250	532	site_532
zachpom	0	tree	highway_250	highway	s250	533	site_533
zachpom	0.00106394	tree	highway_250	highway	s250	534	site_534
zachpom	0.000772378	tree	highway_250	highway	s250	535	site_535
zachpom	0.0261061	tree	highway_250	highway	s250	536	site_536
zachpom	0.253388	tree	highway_250	highway	s250	537	site_537
zachpom	0.00770937	tree	highway_250	highway	s250	538	site_538
zachpom	0	tree	highway_250	highway	s250	539	site_539
zachpom	0.063974	tree	highway_250	highway	s250	540	site_540
zachpom	0.71009	tree	highway_250	highway	s250	541	site_541
zachpom	0.39718	tree	highway_250	highway	s250	542	site_542
zachpom	0.759955	tree	highway_250	highway	s250	543	site_543
zachpom	0.0729909	tree	highway_250	highway	s250	544	site_544
zachpom	0.000882899	tree	highway_250	highway	s250	545	site_545
zachpom	0	tree	highway_250	highway	s250	546	site_546
zachpom	0.191903	tree	highway_250	highway	s250	547	site_547
zachpom	0.887285	tree	highway_250	highway	s250	548	site_548
zachpom	0.000795068	tree	highway_250	highway	s250	549	site_549
zachpom	0.729802	tree	highway_250	highway	s250	550	site_550
zachpom	0.00985938	tree	highway_250	highway	s250	551	site_551
zachpom	0.00396208	tree	highway_250	highway	s250	552	site_552
zachpom	0.0548927	tree	highway_250	highway	s250	553	site_553
zachpom	0.285752	tree	highway_250	highway	s250	554	site_554
zachpom	0.818523	tree	highway_250	highway	s250	555	site_555
zachpom	0.151915	tree	highway_250	highway	s250	556	site_556
zachpom	0	tree	highway_250	highway	s250	557	site_557
zachpom	0.771927	tree	highway_250	highway	s250	558	site_558
zachpom	0.587305	tree	highway_250	highway	s250	559	site_559
zachpom	0.0948552	tree	highway_250	highway	s250	560	site_560
zachpom	0.897945	tree	highway_250	highway	s250	561	site_561
zachpom	0.00131283	tree	highway_250	highway	s250	562	site_562
zachpom	0.804787	tree	highway_250	highway	s250	563	site_563
zachpom	0.203982	tree	highway_250	highway	s250	564	site_564
zachpom	0	tree	highway_250	highway	s250	565	site_565
zachpom	0.288993	tree	highway_250	highway	s250	566	site_566
zachpom	0.24544	tree	highway_250	highway	s250	567	site_567
zachpom	0.127774	tree	highway_250	highway	s250	568	site_568
zachpom	0.700947	tree	highway_250	highway	s250	569	site_569
zachpom	0.0452571	tree	highway_250	highway	s250	570	site_570
zachpom	0.0669928	tree	highway_250	highway	s250	571	site_571
zachpom	0	tree	highway_250	highway	s250	572	site_572
zachpom	0.000264339	tree	highway_250	highway	s250	573	site_573
dolno	0.0374675	grass	highway_250	highway	s250	1	site_1
dolno	0.52235	grass	highway_250	highway	s250	2	site_2
dolno	0.38263	grass	highway_250	highway	s250	3	site_3
dolno	0.0127333	grass	highway_250	highway	s250	4	site_4
dolno	0.150655	grass	highway_250	highway	s250	5	site_5
dolno	0.0530957	grass	highway_250	highway	s250	6	site_6
dolno	0.341472	grass	highway_250	highway	s250	7	site_7
dolno	0.409112	grass	highway_250	highway	s250	8	site_8
dolno	0.105733	grass	highway_250	highway	s250	9	site_9
dolno	0.0883169	grass	highway_250	highway	s250	10	site_10
dolno	0.0180114	grass	highway_250	highway	s250	11	site_11
dolno	0.064799	grass	highway_250	highway	s250	12	site_12
dolno	0.226746	grass	highway_250	highway	s250	13	site_13
dolno	0.149126	grass	highway_250	highway	s250	14	site_14
dolno	0.0547904	grass	highway_250	highway	s250	15	site_15
dolno	0.0396913	grass	highway_250	highway	s250	16	site_16
dolno	0.480968	grass	highway_250	highway	s250	17	site_17
dolno	0.270903	grass	highway_250	highway	s250	18	site_18
dolno	0.581753	grass	highway_250	highway	s250	19	site_19
dolno	0.26479	grass	highway_250	highway	s250	20	site_20
dolno	0.35112	grass	highway_250	highway	s250	21	site_21
dolno	0.0661729	grass	highway_250	highway	s250	22	site_22
dolno	0.0745041	grass	highway_250	highway	s250	23	site_23
dolno	0.792949	grass	highway_250	highway	s250	24	site_24
dolno	0.0305227	grass	highway_250	highway	s250	25	site_25
dolno	0.225414	grass	highway_250	highway	s250	26	site_26
dolno	0.038194	grass	highway_250	highway	s250	27	site_27
dolno	0.0810924	grass	highway_250	highway	s250	28	site_28
dolno	0.0158052	grass	highway_250	highway	s250	29	site_29
dolno	0.58014	grass	highway_250	highway	s250	30	site_30
dolno	0.381339	grass	highway_250	highway	s250	31	site_31
dolno	0.0265955	grass	highway_250	highway	s250	32	site_32
dolno	0.176038	grass	highway_250	highway	s250	33	site_33
dolno	0.331188	grass	highway_250	highway	s250	34	site_34
dolno	0.0530126	grass	highway_250	highway	s250	35	site_35
dolno	0.0324923	grass	highway_250	highway	s250	36	site_36
dolno	0.111607	grass	highway_250	highway	s250	37	site_37
dolno	0.128198	grass	highway_250	highway	s250	38	site_38
dolno	0.0579182	grass	highway_250	highway	s250	39	site_39
dolno	0.163018	grass	highway_250	highway	s250	40	site_40
dolno	0.592307	grass	highway_250	highway	s250	41	site_41
dolno	0.0328036	grass	highway_250	highway	s250	42	site_42
dolno	0.390155	grass	highway_250	highway	s250	43	site_43
dolno	0.402345	grass	highway_250	highway	s250	44	site_44
dolno	0.649746	grass	highway_250	highway	s250	45	site_45
dolno	0.0480568	grass	highway_250	highway	s250	46	site_46
dolno	0.424754	grass	highway_250	highway	s250	47	site_47
dolno	0.17942	grass	highway_250	highway	s250	48	site_48
dolno	0.130541	grass	highway_250	highway	s250	49	site_49
dolno	0.763188	grass	highway_250	highway	s250	50	site_50
dolno	0.387135	grass	highway_250	highway	s250	51	site_51
dolno	0.205456	grass	highway_250	highway	s250	52	site_52
dolno	0.0662974	grass	highway_250	highway	s250	53	site_53
dolno	0.272368	grass	highway_250	highway	s250	54	site_54
dolno	0.309757	grass	highway_250	highway	s250	55	site_55
dolno	0.0772436	grass	highway_250	highway	s250	56	site_56
dolno	0.146047	grass	highway_250	highway	s250	57	site_57
kujaw	0.442258	grass	highway_250	highway	s250	58	site_58
kujaw	0.0161833	grass	highway_250	highway	s250	59	site_59
kujaw	0.607842	grass	highway_250	highway	s250	60	site_60
kujaw	0.102124	grass	highway_250	highway	s250	61	site_61
kujaw	0.120055	grass	highway_250	highway	s250	62	site_62
kujaw	0.166546	grass	highway_250	highway	s250	63	site_63
kujaw	0.183591	grass	highway_250	highway	s250	64	site_64
kujaw	0.0555235	grass	highway_250	highway	s250	65	site_65
kujaw	0.110667	grass	highway_250	highway	s250	66	site_66
kujaw	0.0162168	grass	highway_250	highway	s250	67	site_67
kujaw	0.0458045	grass	highway_250	highway	s250	68	site_68
kujaw	0.100921	grass	highway_250	highway	s250	69	site_69
kujaw	0.200018	grass	highway_250	highway	s250	70	site_70
kujaw	0.159443	grass	highway_250	highway	s250	71	site_71
kujaw	0.223075	grass	highway_250	highway	s250	72	site_72
kujaw	0.220025	grass	highway_250	highway	s250	73	site_73
kujaw	0.268982	grass	highway_250	highway	s250	74	site_74
kujaw	0.0446371	grass	highway_250	highway	s250	75	site_75
kujaw	0.288974	grass	highway_250	highway	s250	76	site_76
kujaw	0.14312	grass	highway_250	highway	s250	77	site_77
kujaw	0.0840148	grass	highway_250	highway	s250	78	site_78
kujaw	0.161458	grass	highway_250	highway	s250	79	site_79
kujaw	0.155625	grass	highway_250	highway	s250	80	site_80
kujaw	0.172313	grass	highway_250	highway	s250	81	site_81
kujaw	0.21185	grass	highway_250	highway	s250	82	site_82
kujaw	0.0108018	grass	highway_250	highway	s250	83	site_83
kujaw	0.240003	grass	highway_250	highway	s250	84	site_84
kujaw	0.0842158	grass	highway_250	highway	s250	85	site_85
kujaw	0.282607	grass	highway_250	highway	s250	86	site_86
kujaw	0.310179	grass	highway_250	highway	s250	87	site_87
kujaw	0.213555	grass	highway_250	highway	s250	88	site_88
kujaw	0.0865154	grass	highway_250	highway	s250	89	site_89
kujaw	0.0383755	grass	highway_250	highway	s250	90	site_90
lubel	0.225892	grass	highway_250	highway	s250	91	site_91
lubel	0.184613	grass	highway_250	highway	s250	92	site_92
lubel	0.179761	grass	highway_250	highway	s250	93	site_93
lubel	0.434779	grass	highway_250	highway	s250	94	site_94
lubel	0.235803	grass	highway_250	highway	s250	95	site_95
lubel	0.156039	grass	highway_250	highway	s250	96	site_96
lubel	0.170924	grass	highway_250	highway	s250	97	site_97
lubel	0.175461	grass	highway_250	highway	s250	98	site_98
lubel	0.14283	grass	highway_250	highway	s250	99	site_99
lubel	0.102129	grass	highway_250	highway	s250	100	site_100
lubel	0.419984	grass	highway_250	highway	s250	101	site_101
lubel	0.326387	grass	highway_250	highway	s250	102	site_102
lubel	0.537866	grass	highway_250	highway	s250	103	site_103
lubel	0.297503	grass	highway_250	highway	s250	104	site_104
lubel	0.322937	grass	highway_250	highway	s250	105	site_105
lubel	0.220621	grass	highway_250	highway	s250	106	site_106
lubel	0.165853	grass	highway_250	highway	s250	107	site_107
lubel	0.23462	grass	highway_250	highway	s250	108	site_108
lubel	0.310606	grass	highway_250	highway	s250	109	site_109
lubel	0.364706	grass	highway_250	highway	s250	110	site_110
lubel	0.178426	grass	highway_250	highway	s250	111	site_111
lubel	0.183791	grass	highway_250	highway	s250	112	site_112
lubel	0.147241	grass	highway_250	highway	s250	113	site_113
lubel	0.303856	grass	highway_250	highway	s250	114	site_114
lubel	0.0813697	grass	highway_250	highway	s250	115	site_115
lubu	0.172693	grass	highway_250	highway	s250	116	site_116
lubu	0.12434	grass	highway_250	highway	s250	117	site_117
lubu	0.0768221	grass	highway_250	highway	s250	118	site_118
lubu	0.158016	grass	highway_250	highway	s250	119	site_119
lubu	0.0171593	grass	highway_250	highway	s250	120	site_120
lubu	0.0900089	grass	highway_250	highway	s250	121	site_121
lubu	0.228183	grass	highway_250	highway	s250	122	site_122
lubu	0.0463384	grass	highway_250	highway	s250	123	site_123
lubu	0.176691	grass	highway_250	highway	s250	124	site_124
lubu	0.113337	grass	highway_250	highway	s250	125	site_125
lubu	0.455431	grass	highway_250	highway	s250	126	site_126
lubu	0.118591	grass	highway_250	highway	s250	127	site_127
lubu	0.31786	grass	highway_250	highway	s250	128	site_128
lubu	0.0414908	grass	highway_250	highway	s250	129	site_129
lubu	0.219033	grass	highway_250	highway	s250	130	site_130
lubu	0.159917	grass	highway_250	highway	s250	131	site_131
lubu	0.332416	grass	highway_250	highway	s250	132	site_132
lubu	0.266894	grass	highway_250	highway	s250	133	site_133
lubu	0.237313	grass	highway_250	highway	s250	134	site_134
lubu	0.0793413	grass	highway_250	highway	s250	135	site_135
lubu	0.0792604	grass	highway_250	highway	s250	136	site_136
lubu	0.209505	grass	highway_250	highway	s250	137	site_137
lubu	0.218463	grass	highway_250	highway	s250	138	site_138
lubu	0.296256	grass	highway_250	highway	s250	139	site_139
lubu	0.296872	grass	highway_250	highway	s250	140	site_140
lubu	0.0597165	grass	highway_250	highway	s250	141	site_141
lubu	0.418588	grass	highway_250	highway	s250	142	site_142
lubu	0.536843	grass	highway_250	highway	s250	143	site_143
lubu	0.14128	grass	highway_250	highway	s250	144	site_144
lubu	0.183766	grass	highway_250	highway	s250	145	site_145
lubu	0.0185037	grass	highway_250	highway	s250	146	site_146
lodz	0.290144	grass	highway_250	highway	s250	147	site_147
lodz	0.82156	grass	highway_250	highway	s250	148	site_148
lodz	0.190895	grass	highway_250	highway	s250	149	site_149
lodz	0.64095	grass	highway_250	highway	s250	150	site_150
lodz	0.499414	grass	highway_250	highway	s250	151	site_151
lodz	0.278748	grass	highway_250	highway	s250	152	site_152
lodz	0.276368	grass	highway_250	highway	s250	153	site_153
lodz	0.404475	grass	highway_250	highway	s250	154	site_154
lodz	0.199664	grass	highway_250	highway	s250	155	site_155
lodz	0.207433	grass	highway_250	highway	s250	156	site_156
lodz	0.398704	grass	highway_250	highway	s250	157	site_157
lodz	0.158419	grass	highway_250	highway	s250	158	site_158
lodz	0.280616	grass	highway_250	highway	s250	159	site_159
lodz	0.272717	grass	highway_250	highway	s250	160	site_160
lodz	0.267408	grass	highway_250	highway	s250	161	site_161
lodz	0.179006	grass	highway_250	highway	s250	162	site_162
lodz	0.0779064	grass	highway_250	highway	s250	163	site_163
lodz	0.398088	grass	highway_250	highway	s250	164	site_164
lodz	0.723073	grass	highway_250	highway	s250	165	site_165
lodz	0.191393	grass	highway_250	highway	s250	166	site_166
lodz	0.0654839	grass	highway_250	highway	s250	167	site_167
lodz	0.438188	grass	highway_250	highway	s250	168	site_168
lodz	0.284966	grass	highway_250	highway	s250	169	site_169
lodz	0.254026	grass	highway_250	highway	s250	170	site_170
lodz	0.232461	grass	highway_250	highway	s250	171	site_171
lodz	0.375159	grass	highway_250	highway	s250	172	site_172
lodz	0.372003	grass	highway_250	highway	s250	173	site_173
lodz	0.186958	grass	highway_250	highway	s250	174	site_174
lodz	0.179504	grass	highway_250	highway	s250	175	site_175
lodz	0.462271	grass	highway_250	highway	s250	176	site_176
lodz	0.111535	grass	highway_250	highway	s250	177	site_177
lodz	0.213634	grass	highway_250	highway	s250	178	site_178
lodz	0.574067	grass	highway_250	highway	s250	179	site_179
lodz	0.201101	grass	highway_250	highway	s250	180	site_180
lodz	0.443259	grass	highway_250	highway	s250	181	site_181
lodz	0.357914	grass	highway_250	highway	s250	182	site_182
lodz	0.118661	grass	highway_250	highway	s250	183	site_183
lodz	0.143368	grass	highway_250	highway	s250	184	site_184
lodz	0.0713375	grass	highway_250	highway	s250	185	site_185
lodz	0.419301	grass	highway_250	highway	s250	186	site_186
lodz	0.144586	grass	highway_250	highway	s250	187	site_187
lodz	0.465515	grass	highway_250	highway	s250	188	site_188
lodz	0.0782241	grass	highway_250	highway	s250	189	site_189
lodz	0.242429	grass	highway_250	highway	s250	190	site_190
lodz	0.131056	grass	highway_250	highway	s250	191	site_191
lodz	0.308223	grass	highway_250	highway	s250	192	site_192
lodz	0.338737	grass	highway_250	highway	s250	193	site_193
lodz	0.37411	grass	highway_250	highway	s250	194	site_194
lodz	0.522802	grass	highway_250	highway	s250	195	site_195
lodz	0.250487	grass	highway_250	highway	s250	196	site_196
lodz	0.406	grass	highway_250	highway	s250	197	site_197
lodz	0.412956	grass	highway_250	highway	s250	198	site_198
lodz	0.213354	grass	highway_250	highway	s250	199	site_199
lodz	0.342783	grass	highway_250	highway	s250	200	site_200
lodz	0.107926	grass	highway_250	highway	s250	201	site_201
lodz	0.305213	grass	highway_250	highway	s250	202	site_202
malo	0.645935	grass	highway_250	highway	s250	203	site_203
malo	0.359415	grass	highway_250	highway	s250	204	site_204
malo	0.432424	grass	highway_250	highway	s250	205	site_205
malo	0.244661	grass	highway_250	highway	s250	206	site_206
malo	0.193283	grass	highway_250	highway	s250	207	site_207
malo	0.51054	grass	highway_250	highway	s250	208	site_208
malo	0.109182	grass	highway_250	highway	s250	209	site_209
malo	0.729699	grass	highway_250	highway	s250	210	site_210
malo	0.19554	grass	highway_250	highway	s250	211	site_211
malo	0.141307	grass	highway_250	highway	s250	212	site_212
malo	0.167299	grass	highway_250	highway	s250	213	site_213
malo	0.743204	grass	highway_250	highway	s250	214	site_214
malo	0.211327	grass	highway_250	highway	s250	215	site_215
malo	0.163262	grass	highway_250	highway	s250	216	site_216
malo	0.226714	grass	highway_250	highway	s250	217	site_217
malo	0.393288	grass	highway_250	highway	s250	218	site_218
malo	0.23577	grass	highway_250	highway	s250	219	site_219
malo	0.231509	grass	highway_250	highway	s250	220	site_220
malo	0.221874	grass	highway_250	highway	s250	221	site_221
malo	0.541358	grass	highway_250	highway	s250	222	site_222
malo	0.125938	grass	highway_250	highway	s250	223	site_223
malo	0.45707	grass	highway_250	highway	s250	224	site_224
malo	0.207627	grass	highway_250	highway	s250	225	site_225
malo	0.381536	grass	highway_250	highway	s250	226	site_226
malo	0.0754402	grass	highway_250	highway	s250	227	site_227
maz	0.338805	grass	highway_250	highway	s250	228	site_228
maz	0.14824	grass	highway_250	highway	s250	229	site_229
maz	0.123775	grass	highway_250	highway	s250	230	site_230
maz	0.460901	grass	highway_250	highway	s250	231	site_231
maz	0.248634	grass	highway_250	highway	s250	232	site_232
maz	0.445695	grass	highway_250	highway	s250	233	site_233
maz	0.277088	grass	highway_250	highway	s250	234	site_234
maz	0.241963	grass	highway_250	highway	s250	235	site_235
maz	0.29639	grass	highway_250	highway	s250	236	site_236
maz	0.0681503	grass	highway_250	highway	s250	237	site_237
maz	0.310841	grass	highway_250	highway	s250	238	site_238
maz	0.151263	grass	highway_250	highway	s250	239	site_239
maz	0.478004	grass	highway_250	highway	s250	240	site_240
maz	0.487368	grass	highway_250	highway	s250	241	site_241
maz	0.112251	grass	highway_250	highway	s250	242	site_242
maz	0.629108	grass	highway_250	highway	s250	243	site_243
maz	0.0839553	grass	highway_250	highway	s250	244	site_244
maz	0.17709	grass	highway_250	highway	s250	245	site_245
maz	0.660102	grass	highway_250	highway	s250	246	site_246
maz	0.609934	grass	highway_250	highway	s250	247	site_247
maz	0.519349	grass	highway_250	highway	s250	248	site_248
maz	0.0762115	grass	highway_250	highway	s250	249	site_249
maz	0.556099	grass	highway_250	highway	s250	250	site_250
maz	0.116592	grass	highway_250	highway	s250	251	site_251
maz	0.236228	grass	highway_250	highway	s250	252	site_252
maz	0.226908	grass	highway_250	highway	s250	253	site_253
maz	0.123792	grass	highway_250	highway	s250	254	site_254
maz	0.32353	grass	highway_250	highway	s250	255	site_255
maz	0.0334618	grass	highway_250	highway	s250	256	site_256
maz	0.526889	grass	highway_250	highway	s250	257	site_257
maz	0.297203	grass	highway_250	highway	s250	258	site_258
maz	0.303667	grass	highway_250	highway	s250	259	site_259
maz	0.0729236	grass	highway_250	highway	s250	260	site_260
maz	0.309497	grass	highway_250	highway	s250	261	site_261
maz	0	grass	highway_250	highway	s250	262	site_262
maz	0.597474	grass	highway_250	highway	s250	263	site_263
maz	0.564325	grass	highway_250	highway	s250	264	site_264
maz	0.245345	grass	highway_250	highway	s250	265	site_265
maz	0.278583	grass	highway_250	highway	s250	266	site_266
maz	0.12146	grass	highway_250	highway	s250	267	site_267
maz	0.182177	grass	highway_250	highway	s250	268	site_268
maz	0.420401	grass	highway_250	highway	s250	269	site_269
maz	0.653599	grass	highway_250	highway	s250	270	site_270
maz	0.135025	grass	highway_250	highway	s250	271	site_271
maz	0.195965	grass	highway_250	highway	s250	272	site_272
maz	0.503235	grass	highway_250	highway	s250	273	site_273
maz	0.237901	grass	highway_250	highway	s250	274	site_274
maz	0.234942	grass	highway_250	highway	s250	275	site_275
maz	0.212699	grass	highway_250	highway	s250	276	site_276
maz	0.478974	grass	highway_250	highway	s250	277	site_277
maz	0.04806	grass	highway_250	highway	s250	278	site_278
maz	0.289258	grass	highway_250	highway	s250	279	site_279
maz	0.281051	grass	highway_250	highway	s250	280	site_280
maz	0.459676	grass	highway_250	highway	s250	281	site_281
maz	0.321527	grass	highway_250	highway	s250	282	site_282
maz	0.405712	grass	highway_250	highway	s250	283	site_283
maz	0.20225	grass	highway_250	highway	s250	284	site_284
maz	0.459616	grass	highway_250	highway	s250	285	site_285
maz	0.349953	grass	highway_250	highway	s250	286	site_286
maz	0.489437	grass	highway_250	highway	s250	287	site_287
maz	0.239451	grass	highway_250	highway	s250	288	site_288
maz	0.04818	grass	highway_250	highway	s250	289	site_289
maz	0.44355	grass	highway_250	highway	s250	290	site_290
maz	0.23146	grass	highway_250	highway	s250	291	site_291
maz	0.206348	grass	highway_250	highway	s250	292	site_292
maz	0.34286	grass	highway_250	highway	s250	293	site_293
maz	0.0872644	grass	highway_250	highway	s250	294	site_294
maz	0.0349501	grass	highway_250	highway	s250	295	site_295
maz	0.067536	grass	highway_250	highway	s250	296	site_296
maz	0.557651	grass	highway_250	highway	s250	297	site_297
maz	0.37344	grass	highway_250	highway	s250	298	site_298
maz	0.185558	grass	highway_250	highway	s250	299	site_299
maz	0.163518	grass	highway_250	highway	s250	300	site_300
opol	0.261047	grass	highway_250	highway	s250	301	site_301
opol	0.0794678	grass	highway_250	highway	s250	302	site_302
opol	0.45302	grass	highway_250	highway	s250	303	site_303
opol	0.11093	grass	highway_250	highway	s250	304	site_304
opol	0.165377	grass	highway_250	highway	s250	305	site_305
opol	0.0788313	grass	highway_250	highway	s250	306	site_306
opol	0	grass	highway_250	highway	s250	307	site_307
opol	0.443816	grass	highway_250	highway	s250	308	site_308
opol	0.119767	grass	highway_250	highway	s250	309	site_309
opol	0.0889398	grass	highway_250	highway	s250	310	site_310
opol	0.0828141	grass	highway_250	highway	s250	311	site_311
podk	0.0688569	grass	highway_250	highway	s250	312	site_312
podk	0.528622	grass	highway_250	highway	s250	313	site_313
podk	0.734769	grass	highway_250	highway	s250	314	site_314
podk	0.59584	grass	highway_250	highway	s250	315	site_315
podk	0.201547	grass	highway_250	highway	s250	316	site_316
podk	0.248146	grass	highway_250	highway	s250	317	site_317
podk	0.193604	grass	highway_250	highway	s250	318	site_318
podk	0.485074	grass	highway_250	highway	s250	319	site_319
podk	0.598984	grass	highway_250	highway	s250	320	site_320
podk	0.554995	grass	highway_250	highway	s250	321	site_321
podk	0.326903	grass	highway_250	highway	s250	322	site_322
podk	0.193882	grass	highway_250	highway	s250	323	site_323
podk	0.305932	grass	highway_250	highway	s250	324	site_324
podk	0.439318	grass	highway_250	highway	s250	325	site_325
podk	0.120902	grass	highway_250	highway	s250	326	site_326
podk	0.357713	grass	highway_250	highway	s250	327	site_327
podk	0.218021	grass	highway_250	highway	s250	328	site_328
podk	0.332425	grass	highway_250	highway	s250	329	site_329
podk	0.211638	grass	highway_250	highway	s250	330	site_330
podk	0.191451	grass	highway_250	highway	s250	331	site_331
podk	0.322865	grass	highway_250	highway	s250	332	site_332
podk	0.475236	grass	highway_250	highway	s250	333	site_333
podk	0.0742188	grass	highway_250	highway	s250	334	site_334
podk	0.319223	grass	highway_250	highway	s250	335	site_335
podk	0.20904	grass	highway_250	highway	s250	336	site_336
podk	0.391798	grass	highway_250	highway	s250	337	site_337
podk	0.424304	grass	highway_250	highway	s250	338	site_338
podl	0.244184	grass	highway_250	highway	s250	339	site_339
podl	0.188481	grass	highway_250	highway	s250	340	site_340
podl	0.385618	grass	highway_250	highway	s250	341	site_341
podl	0.553041	grass	highway_250	highway	s250	342	site_342
podl	0.140281	grass	highway_250	highway	s250	343	site_343
podl	0.373898	grass	highway_250	highway	s250	344	site_344
podl	0.259355	grass	highway_250	highway	s250	345	site_345
podl	0.0956603	grass	highway_250	highway	s250	346	site_346
podl	0.251938	grass	highway_250	highway	s250	347	site_347
podl	0.594202	grass	highway_250	highway	s250	348	site_348
podl	0.199722	grass	highway_250	highway	s250	349	site_349
podl	0.156335	grass	highway_250	highway	s250	350	site_350
podl	0.33259	grass	highway_250	highway	s250	351	site_351
podl	0.120695	grass	highway_250	highway	s250	352	site_352
podl	0.493622	grass	highway_250	highway	s250	353	site_353
podl	0.126958	grass	highway_250	highway	s250	354	site_354
podl	0.121195	grass	highway_250	highway	s250	355	site_355
podl	0.41789	grass	highway_250	highway	s250	356	site_356
podl	0.305359	grass	highway_250	highway	s250	357	site_357
podl	0.517035	grass	highway_250	highway	s250	358	site_358
podl	0.188479	grass	highway_250	highway	s250	359	site_359
podl	0.221191	grass	highway_250	highway	s250	360	site_360
podl	0.693139	grass	highway_250	highway	s250	361	site_361
podl	0.280632	grass	highway_250	highway	s250	362	site_362
podl	0.119433	grass	highway_250	highway	s250	363	site_363
podl	0.251375	grass	highway_250	highway	s250	364	site_364
pom	0.372775	grass	highway_250	highway	s250	365	site_365
pom	0.251106	grass	highway_250	highway	s250	366	site_366
pom	0.344174	grass	highway_250	highway	s250	367	site_367
pom	0.275985	grass	highway_250	highway	s250	368	site_368
pom	0.47286	grass	highway_250	highway	s250	369	site_369
pom	0.0687768	grass	highway_250	highway	s250	370	site_370
pom	0.099591	grass	highway_250	highway	s250	371	site_371
pom	0.133922	grass	highway_250	highway	s250	372	site_372
pom	0.116241	grass	highway_250	highway	s250	373	site_373
pom	0.323557	grass	highway_250	highway	s250	374	site_374
pom	0.17512	grass	highway_250	highway	s250	375	site_375
pom	0.255202	grass	highway_250	highway	s250	376	site_376
pom	0.229414	grass	highway_250	highway	s250	377	site_377
pom	0.130073	grass	highway_250	highway	s250	378	site_378
pom	0.133182	grass	highway_250	highway	s250	379	site_379
pom	0.209609	grass	highway_250	highway	s250	380	site_380
pom	0.453154	grass	highway_250	highway	s250	381	site_381
pom	0.3093	grass	highway_250	highway	s250	382	site_382
pom	0.487	grass	highway_250	highway	s250	383	site_383
pom	0.00841292	grass	highway_250	highway	s250	384	site_384
slas	0.542388	grass	highway_250	highway	s250	385	site_385
slas	0.24964	grass	highway_250	highway	s250	386	site_386
slas	0.511175	grass	highway_250	highway	s250	387	site_387
slas	0.181207	grass	highway_250	highway	s250	388	site_388
slas	0.119984	grass	highway_250	highway	s250	389	site_389
slas	0.181188	grass	highway_250	highway	s250	390	site_390
slas	0.209693	grass	highway_250	highway	s250	391	site_391
slas	0.396206	grass	highway_250	highway	s250	392	site_392
slas	0.20541	grass	highway_250	highway	s250	393	site_393
slas	0.151089	grass	highway_250	highway	s250	394	site_394
slas	0.460519	grass	highway_250	highway	s250	395	site_395
slas	0.189835	grass	highway_250	highway	s250	396	site_396
slas	0.541164	grass	highway_250	highway	s250	397	site_397
slas	0.546399	grass	highway_250	highway	s250	398	site_398
slas	0.275009	grass	highway_250	highway	s250	399	site_399
slas	0.148168	grass	highway_250	highway	s250	400	site_400
slas	0.152245	grass	highway_250	highway	s250	401	site_401
slas	0.148544	grass	highway_250	highway	s250	402	site_402
slas	0.105953	grass	highway_250	highway	s250	403	site_403
slas	0.00532135	grass	highway_250	highway	s250	404	site_404
slas	0.305411	grass	highway_250	highway	s250	405	site_405
slas	0.380292	grass	highway_250	highway	s250	406	site_406
slas	0.0143947	grass	highway_250	highway	s250	407	site_407
slas	0.195759	grass	highway_250	highway	s250	408	site_408
slas	0.26996	grass	highway_250	highway	s250	409	site_409
slas	0.303684	grass	highway_250	highway	s250	410	site_410
slas	0.224562	grass	highway_250	highway	s250	411	site_411
slas	0.188346	grass	highway_250	highway	s250	412	site_412
slas	0.426489	grass	highway_250	highway	s250	413	site_413
slas	0.173876	grass	highway_250	highway	s250	414	site_414
slas	0.138514	grass	highway_250	highway	s250	415	site_415
slas	0.183992	grass	highway_250	highway	s250	416	site_416
slas	0.0227407	grass	highway_250	highway	s250	417	site_417
slas	0.489822	grass	highway_250	highway	s250	418	site_418
slas	0.0715585	grass	highway_250	highway	s250	419	site_419
slas	0.239863	grass	highway_250	highway	s250	420	site_420
slas	0.512043	grass	highway_250	highway	s250	421	site_421
slas	0.289468	grass	highway_250	highway	s250	422	site_422
slas	0.145598	grass	highway_250	highway	s250	423	site_423
slas	0.273621	grass	highway_250	highway	s250	424	site_424
slas	0.336191	grass	highway_250	highway	s250	425	site_425
slas	0.412961	grass	highway_250	highway	s250	426	site_426
slas	0.635245	grass	highway_250	highway	s250	427	site_427
slas	0.0271622	grass	highway_250	highway	s250	428	site_428
slas	0.469804	grass	highway_250	highway	s250	429	site_429
slas	0.806585	grass	highway_250	highway	s250	430	site_430
swiet	0.352133	grass	highway_250	highway	s250	431	site_431
swiet	0.0758103	grass	highway_250	highway	s250	432	site_432
swiet	0.765027	grass	highway_250	highway	s250	433	site_433
swiet	0.132347	grass	highway_250	highway	s250	434	site_434
swiet	0.00501004	grass	highway_250	highway	s250	435	site_435
swiet	0.253421	grass	highway_250	highway	s250	436	site_436
swiet	0.182952	grass	highway_250	highway	s250	437	site_437
swiet	0.451196	grass	highway_250	highway	s250	438	site_438
swiet	0.508317	grass	highway_250	highway	s250	439	site_439
swiet	0.318181	grass	highway_250	highway	s250	440	site_440
swiet	0.223724	grass	highway_250	highway	s250	441	site_441
swiet	0.0702696	grass	highway_250	highway	s250	442	site_442
warm	0.0565629	grass	highway_250	highway	s250	443	site_443
warm	0.471274	grass	highway_250	highway	s250	444	site_444
warm	0.546326	grass	highway_250	highway	s250	445	site_445
warm	0.099015	grass	highway_250	highway	s250	446	site_446
warm	0.0652825	grass	highway_250	highway	s250	447	site_447
warm	0.33785	grass	highway_250	highway	s250	448	site_448
warm	0.0640312	grass	highway_250	highway	s250	449	site_449
warm	0.634292	grass	highway_250	highway	s250	450	site_450
warm	0.389223	grass	highway_250	highway	s250	451	site_451
warm	0.24068	grass	highway_250	highway	s250	452	site_452
warm	0.285751	grass	highway_250	highway	s250	453	site_453
warm	0.10303	grass	highway_250	highway	s250	454	site_454
warm	0.102169	grass	highway_250	highway	s250	455	site_455
warm	0.0883513	grass	highway_250	highway	s250	456	site_456
warm	0.314813	grass	highway_250	highway	s250	457	site_457
warm	0.196853	grass	highway_250	highway	s250	458	site_458
warm	0.879067	grass	highway_250	highway	s250	459	site_459
warm	0.231635	grass	highway_250	highway	s250	460	site_460
warm	0.444964	grass	highway_250	highway	s250	461	site_461
warm	0.132003	grass	highway_250	highway	s250	462	site_462
warm	0.135747	grass	highway_250	highway	s250	463	site_463
warm	0.0853748	grass	highway_250	highway	s250	464	site_464
warm	0.208053	grass	highway_250	highway	s250	465	site_465
warm	0.106294	grass	highway_250	highway	s250	466	site_466
warm	0.365317	grass	highway_250	highway	s250	467	site_467
warm	0.208537	grass	highway_250	highway	s250	468	site_468
warm	0.378403	grass	highway_250	highway	s250	469	site_469
warm	0.719671	grass	highway_250	highway	s250	470	site_470
warm	0.134981	grass	highway_250	highway	s250	471	site_471
warm	0.231016	grass	highway_250	highway	s250	472	site_472
warm	0.6024	grass	highway_250	highway	s250	473	site_473
warm	0.123626	grass	highway_250	highway	s250	474	site_474
warm	0.0914491	grass	highway_250	highway	s250	475	site_475
warm	0.202225	grass	highway_250	highway	s250	476	site_476
warm	0.31908	grass	highway_250	highway	s250	477	site_477
wielko	0.0444959	grass	highway_250	highway	s250	478	site_478
wielko	0.120022	grass	highway_250	highway	s250	479	site_479
wielko	0.0271467	grass	highway_250	highway	s250	480	site_480
wielko	0.868733	grass	highway_250	highway	s250	481	site_481
wielko	0.304729	grass	highway_250	highway	s250	482	site_482
wielko	0.186055	grass	highway_250	highway	s250	483	site_483
wielko	0.265288	grass	highway_250	highway	s250	484	site_484
wielko	0.187721	grass	highway_250	highway	s250	485	site_485
wielko	0.403498	grass	highway_250	highway	s250	486	site_486
wielko	0.402046	grass	highway_250	highway	s250	487	site_487
wielko	0.198545	grass	highway_250	highway	s250	488	site_488
wielko	0.814541	grass	highway_250	highway	s250	489	site_489
wielko	0.109245	grass	highway_250	highway	s250	490	site_490
wielko	0.286996	grass	highway_250	highway	s250	491	site_491
wielko	0.184924	grass	highway_250	highway	s250	492	site_492
wielko	0.153324	grass	highway_250	highway	s250	493	site_493
wielko	0.171417	grass	highway_250	highway	s250	494	site_494
wielko	0.201301	grass	highway_250	highway	s250	495	site_495
wielko	0.131784	grass	highway_250	highway	s250	496	site_496
wielko	0.227993	grass	highway_250	highway	s250	497	site_497
wielko	0.0427148	grass	highway_250	highway	s250	498	site_498
wielko	0.251043	grass	highway_250	highway	s250	499	site_499
wielko	0.257952	grass	highway_250	highway	s250	500	site_500
wielko	0.0772914	grass	highway_250	highway	s250	501	site_501
wielko	0.172889	grass	highway_250	highway	s250	502	site_502
wielko	0.243021	grass	highway_250	highway	s250	503	site_503
wielko	0.296526	grass	highway_250	highway	s250	504	site_504
wielko	0.255823	grass	highway_250	highway	s250	505	site_505
wielko	0.299264	grass	highway_250	highway	s250	506	site_506
wielko	0.195203	grass	highway_250	highway	s250	507	site_507
wielko	0.441778	grass	highway_250	highway	s250	508	site_508
wielko	0.677956	grass	highway_250	highway	s250	509	site_509
wielko	0.211743	grass	highway_250	highway	s250	510	site_510
wielko	0.514558	grass	highway_250	highway	s250	511	site_511
wielko	0.149667	grass	highway_250	highway	s250	512	site_512
wielko	0.30871	grass	highway_250	highway	s250	513	site_513
wielko	0.275529	grass	highway_250	highway	s250	514	site_514
wielko	0.197719	grass	highway_250	highway	s250	515	site_515
wielko	0.212807	grass	highway_250	highway	s250	516	site_516
wielko	0.170397	grass	highway_250	highway	s250	517	site_517
wielko	0.117785	grass	highway_250	highway	s250	518	site_518
wielko	0.209906	grass	highway_250	highway	s250	519	site_519
wielko	0.186523	grass	highway_250	highway	s250	520	site_520
wielko	0.596225	grass	highway_250	highway	s250	521	site_521
wielko	0.206606	grass	highway_250	highway	s250	522	site_522
wielko	0.195048	grass	highway_250	highway	s250	523	site_523
wielko	0.334094	grass	highway_250	highway	s250	524	site_524
wielko	0.156869	grass	highway_250	highway	s250	525	site_525
wielko	0.121941	grass	highway_250	highway	s250	526	site_526
wielko	0.12035	grass	highway_250	highway	s250	527	site_527
wielko	0.344399	grass	highway_250	highway	s250	528	site_528
wielko	0.580217	grass	highway_250	highway	s250	529	site_529
wielko	0.129243	grass	highway_250	highway	s250	530	site_530
wielko	0.177006	grass	highway_250	highway	s250	531	site_531
wielko	0.283849	grass	highway_250	highway	s250	532	site_532
zachpom	0.263922	grass	highway_250	highway	s250	533	site_533
zachpom	0.368275	grass	highway_250	highway	s250	534	site_534
zachpom	0.587631	grass	highway_250	highway	s250	535	site_535
zachpom	0.672993	grass	highway_250	highway	s250	536	site_536
zachpom	0.403716	grass	highway_250	highway	s250	537	site_537
zachpom	0.0740646	grass	highway_250	highway	s250	538	site_538
zachpom	0.103034	grass	highway_250	highway	s250	539	site_539
zachpom	0.38202	grass	highway_250	highway	s250	540	site_540
zachpom	0.201799	grass	highway_250	highway	s250	541	site_541
zachpom	0.054105	grass	highway_250	highway	s250	542	site_542
zachpom	0.0519652	grass	highway_250	highway	s250	543	site_543
zachpom	0.507345	grass	highway_250	highway	s250	544	site_544
zachpom	0.0620866	grass	highway_250	highway	s250	545	site_545
zachpom	0.286737	grass	highway_250	highway	s250	546	site_546
zachpom	0.234538	grass	highway_250	highway	s250	547	site_547
zachpom	0.022852	grass	highway_250	highway	s250	548	site_548
zachpom	0.293665	grass	highway_250	highway	s250	549	site_549
zachpom	0.143818	grass	highway_250	highway	s250	550	site_550
zachpom	0.194729	grass	highway_250	highway	s250	551	site_551
zachpom	0.113472	grass	highway_250	highway	s250	552	site_552
zachpom	0.470103	grass	highway_250	highway	s250	553	site_553
zachpom	0.068263	grass	highway_250	highway	s250	554	site_554
zachpom	0.0330184	grass	highway_250	highway	s250	555	site_555
zachpom	0.561005	grass	highway_250	highway	s250	556	site_556
zachpom	0.0412795	grass	highway_250	highway	s250	557	site_557
zachpom	0.0487877	grass	highway_250	highway	s250	558	site_558
zachpom	0.323771	grass	highway_250	highway	s250	559	site_559
zachpom	0.571304	grass	highway_250	highway	s250	560	site_560
zachpom	0.0290918	grass	highway_250	highway	s250	561	site_561
zachpom	0.493655	grass	highway_250	highway	s250	562	site_562
zachpom	0.0289032	grass	highway_250	highway	s250	563	site_563
zachpom	0.496518	grass	highway_250	highway	s250	564	site_564
zachpom	0.19085	grass	highway_250	highway	s250	565	site_565
zachpom	0.37777	grass	highway_250	highway	s250	566	site_566
zachpom	0.299272	grass	highway_250	highway	s250	567	site_567
zachpom	0.43239	grass	highway_250	highway	s250	568	site_568
zachpom	0.0594051	grass	highway_250	highway	s250	569	site_569
zachpom	0.735082	grass	highway_250	highway	s250	570	site_570
zachpom	0.109162	grass	highway_250	highway	s250	571	site_571
zachpom	0.230163	grass	highway_250	highway	s250	572	site_572
zachpom	0.140493	grass	highway_250	highway	s250	573	site_573
dolno	0.298641	crop	highway_250	highway	s250	1	site_1
dolno	0.218331	crop	highway_250	highway	s250	2	site_2
dolno	0.215459	crop	highway_250	highway	s250	3	site_3
dolno	0.893824	crop	highway_250	highway	s250	4	site_4
dolno	0.672015	crop	highway_250	highway	s250	5	site_5
dolno	0.843728	crop	highway_250	highway	s250	6	site_6
dolno	0.170433	crop	highway_250	highway	s250	7	site_7
dolno	0.442602	crop	highway_250	highway	s250	8	site_8
dolno	0	crop	highway_250	highway	s250	9	site_9
dolno	0	crop	highway_250	highway	s250	10	site_10
dolno	0.771063	crop	highway_250	highway	s250	11	site_11
dolno	0.465138	crop	highway_250	highway	s250	12	site_12
dolno	0.317149	crop	highway_250	highway	s250	13	site_13
dolno	0.753544	crop	highway_250	highway	s250	14	site_14
dolno	0.838941	crop	highway_250	highway	s250	15	site_15
dolno	0.869607	crop	highway_250	highway	s250	16	site_16
dolno	0.000275365	crop	highway_250	highway	s250	17	site_17
dolno	0.625683	crop	highway_250	highway	s250	18	site_18
dolno	0.107838	crop	highway_250	highway	s250	19	site_19
dolno	0.289811	crop	highway_250	highway	s250	20	site_20
dolno	0.177306	crop	highway_250	highway	s250	21	site_21
dolno	0.720522	crop	highway_250	highway	s250	22	site_22
dolno	0.77417	crop	highway_250	highway	s250	23	site_23
dolno	0.0313507	crop	highway_250	highway	s250	24	site_24
dolno	0.602241	crop	highway_250	highway	s250	25	site_25
dolno	0.11609	crop	highway_250	highway	s250	26	site_26
dolno	0.883592	crop	highway_250	highway	s250	27	site_27
dolno	0	crop	highway_250	highway	s250	28	site_28
dolno	0.896697	crop	highway_250	highway	s250	29	site_29
dolno	0.169214	crop	highway_250	highway	s250	30	site_30
dolno	0.218675	crop	highway_250	highway	s250	31	site_31
dolno	0.869373	crop	highway_250	highway	s250	32	site_32
dolno	0.724246	crop	highway_250	highway	s250	33	site_33
dolno	0.355513	crop	highway_250	highway	s250	34	site_34
dolno	0.855562	crop	highway_250	highway	s250	35	site_35
dolno	0.650729	crop	highway_250	highway	s250	36	site_36
dolno	0.793927	crop	highway_250	highway	s250	37	site_37
dolno	0.798475	crop	highway_250	highway	s250	38	site_38
dolno	0.68469	crop	highway_250	highway	s250	39	site_39
dolno	0	crop	highway_250	highway	s250	40	site_40
dolno	0.092976	crop	highway_250	highway	s250	41	site_41
dolno	0.842427	crop	highway_250	highway	s250	42	site_42
dolno	0.417185	crop	highway_250	highway	s250	43	site_43
dolno	0.5139	crop	highway_250	highway	s250	44	site_44
dolno	0.115433	crop	highway_250	highway	s250	45	site_45
dolno	0.52721	crop	highway_250	highway	s250	46	site_46
dolno	0.284313	crop	highway_250	highway	s250	47	site_47
dolno	0	crop	highway_250	highway	s250	48	site_48
dolno	0	crop	highway_250	highway	s250	49	site_49
dolno	0.000358119	crop	highway_250	highway	s250	50	site_50
dolno	0.431913	crop	highway_250	highway	s250	51	site_51
dolno	0.642912	crop	highway_250	highway	s250	52	site_52
dolno	0.791457	crop	highway_250	highway	s250	53	site_53
dolno	0.275792	crop	highway_250	highway	s250	54	site_54
dolno	0.262033	crop	highway_250	highway	s250	55	site_55
dolno	0.782719	crop	highway_250	highway	s250	56	site_56
dolno	0.772628	crop	highway_250	highway	s250	57	site_57
kujaw	0.358845	crop	highway_250	highway	s250	58	site_58
kujaw	0.831021	crop	highway_250	highway	s250	59	site_59
kujaw	0	crop	highway_250	highway	s250	60	site_60
kujaw	0.782602	crop	highway_250	highway	s250	61	site_61
kujaw	0.409971	crop	highway_250	highway	s250	62	site_62
kujaw	0.00581308	crop	highway_250	highway	s250	63	site_63
kujaw	0.357994	crop	highway_250	highway	s250	64	site_64
kujaw	0.859239	crop	highway_250	highway	s250	65	site_65
kujaw	0.495293	crop	highway_250	highway	s250	66	site_66
kujaw	0.230457	crop	highway_250	highway	s250	67	site_67
kujaw	0.838794	crop	highway_250	highway	s250	68	site_68
kujaw	0.79507	crop	highway_250	highway	s250	69	site_69
kujaw	0.0495389	crop	highway_250	highway	s250	70	site_70
kujaw	0.559615	crop	highway_250	highway	s250	71	site_71
kujaw	0.670478	crop	highway_250	highway	s250	72	site_72
kujaw	0.602795	crop	highway_250	highway	s250	73	site_73
kujaw	0.359132	crop	highway_250	highway	s250	74	site_74
kujaw	0.827235	crop	highway_250	highway	s250	75	site_75
kujaw	0.222648	crop	highway_250	highway	s250	76	site_76
kujaw	0.540696	crop	highway_250	highway	s250	77	site_77
kujaw	0.807815	crop	highway_250	highway	s250	78	site_78
kujaw	0.694932	crop	highway_250	highway	s250	79	site_79
kujaw	0.124332	crop	highway_250	highway	s250	80	site_80
kujaw	0.607684	crop	highway_250	highway	s250	81	site_81
kujaw	0.4638	crop	highway_250	highway	s250	82	site_82
kujaw	0	crop	highway_250	highway	s250	83	site_83
kujaw	0	crop	highway_250	highway	s250	84	site_84
kujaw	0.729766	crop	highway_250	highway	s250	85	site_85
kujaw	0.429926	crop	highway_250	highway	s250	86	site_86
kujaw	0.31994	crop	highway_250	highway	s250	87	site_87
kujaw	0.626456	crop	highway_250	highway	s250	88	site_88
kujaw	0.793318	crop	highway_250	highway	s250	89	site_89
kujaw	0	crop	highway_250	highway	s250	90	site_90
lubel	0.126886	crop	highway_250	highway	s250	91	site_91
lubel	0.3225	crop	highway_250	highway	s250	92	site_92
lubel	0.389651	crop	highway_250	highway	s250	93	site_93
lubel	0.319653	crop	highway_250	highway	s250	94	site_94
lubel	0.536826	crop	highway_250	highway	s250	95	site_95
lubel	0.610482	crop	highway_250	highway	s250	96	site_96
lubel	0.405088	crop	highway_250	highway	s250	97	site_97
lubel	0.631704	crop	highway_250	highway	s250	98	site_98
lubel	0.772973	crop	highway_250	highway	s250	99	site_99
lubel	0.407123	crop	highway_250	highway	s250	100	site_100
lubel	0.313634	crop	highway_250	highway	s250	101	site_101
lubel	0.231173	crop	highway_250	highway	s250	102	site_102
lubel	0.0354598	crop	highway_250	highway	s250	103	site_103
lubel	0.148659	crop	highway_250	highway	s250	104	site_104
lubel	0.472454	crop	highway_250	highway	s250	105	site_105
lubel	0.299335	crop	highway_250	highway	s250	106	site_106
lubel	0.530408	crop	highway_250	highway	s250	107	site_107
lubel	0.537463	crop	highway_250	highway	s250	108	site_108
lubel	0.472813	crop	highway_250	highway	s250	109	site_109
lubel	0.49016	crop	highway_250	highway	s250	110	site_110
lubel	0.679205	crop	highway_250	highway	s250	111	site_111
lubel	0.329816	crop	highway_250	highway	s250	112	site_112
lubel	0.632873	crop	highway_250	highway	s250	113	site_113
lubel	0.510892	crop	highway_250	highway	s250	114	site_114
lubel	0.774861	crop	highway_250	highway	s250	115	site_115
lubu	0	crop	highway_250	highway	s250	116	site_116
lubu	0	crop	highway_250	highway	s250	117	site_117
lubu	0	crop	highway_250	highway	s250	118	site_118
lubu	0.597753	crop	highway_250	highway	s250	119	site_119
lubu	0	crop	highway_250	highway	s250	120	site_120
lubu	0.414614	crop	highway_250	highway	s250	121	site_121
lubu	0.101033	crop	highway_250	highway	s250	122	site_122
lubu	0.834104	crop	highway_250	highway	s250	123	site_123
lubu	0	crop	highway_250	highway	s250	124	site_124
lubu	0	crop	highway_250	highway	s250	125	site_125
lubu	0	crop	highway_250	highway	s250	126	site_126
lubu	0	crop	highway_250	highway	s250	127	site_127
lubu	0	crop	highway_250	highway	s250	128	site_128
lubu	0	crop	highway_250	highway	s250	129	site_129
lubu	0.268659	crop	highway_250	highway	s250	130	site_130
lubu	0.578863	crop	highway_250	highway	s250	131	site_131
lubu	0	crop	highway_250	highway	s250	132	site_132
lubu	0.0192822	crop	highway_250	highway	s250	133	site_133
lubu	0	crop	highway_250	highway	s250	134	site_134
lubu	0	crop	highway_250	highway	s250	135	site_135
lubu	0	crop	highway_250	highway	s250	136	site_136
lubu	0.698645	crop	highway_250	highway	s250	137	site_137
lubu	0.695388	crop	highway_250	highway	s250	138	site_138
lubu	0.292899	crop	highway_250	highway	s250	139	site_139
lubu	0.491108	crop	highway_250	highway	s250	140	site_140
lubu	0	crop	highway_250	highway	s250	141	site_141
lubu	0.278299	crop	highway_250	highway	s250	142	site_142
lubu	0.0965343	crop	highway_250	highway	s250	143	site_143
lubu	0	crop	highway_250	highway	s250	144	site_144
lubu	0	crop	highway_250	highway	s250	145	site_145
lubu	0	crop	highway_250	highway	s250	146	site_146
lodz	0.499551	crop	highway_250	highway	s250	147	site_147
lodz	0.109433	crop	highway_250	highway	s250	148	site_148
lodz	0.526689	crop	highway_250	highway	s250	149	site_149
lodz	0.0134105	crop	highway_250	highway	s250	150	site_150
lodz	0.140778	crop	highway_250	highway	s250	151	site_151
lodz	0.621358	crop	highway_250	highway	s250	152	site_152
lodz	0.526066	crop	highway_250	highway	s250	153	site_153
lodz	0.251164	crop	highway_250	highway	s250	154	site_154
lodz	0.381797	crop	highway_250	highway	s250	155	site_155
lodz	0.304846	crop	highway_250	highway	s250	156	site_156
lodz	0.486749	crop	highway_250	highway	s250	157	site_157
lodz	0.676107	crop	highway_250	highway	s250	158	site_158
lodz	0.45511	crop	highway_250	highway	s250	159	site_159
lodz	0.217074	crop	highway_250	highway	s250	160	site_160
lodz	0.0045846	crop	highway_250	highway	s250	161	site_161
lodz	0.562285	crop	highway_250	highway	s250	162	site_162
lodz	0.580079	crop	highway_250	highway	s250	163	site_163
lodz	0.184036	crop	highway_250	highway	s250	164	site_164
lodz	0.00377914	crop	highway_250	highway	s250	165	site_165
lodz	0.510636	crop	highway_250	highway	s250	166	site_166
lodz	0.407024	crop	highway_250	highway	s250	167	site_167
lodz	0.452259	crop	highway_250	highway	s250	168	site_168
lodz	0.539748	crop	highway_250	highway	s250	169	site_169
lodz	0.234143	crop	highway_250	highway	s250	170	site_170
lodz	0.00591196	crop	highway_250	highway	s250	171	site_171
lodz	0.0460327	crop	highway_250	highway	s250	172	site_172
lodz	0.235665	crop	highway_250	highway	s250	173	site_173
lodz	0.389978	crop	highway_250	highway	s250	174	site_174
lodz	0.645325	crop	highway_250	highway	s250	175	site_175
lodz	0.0081163	crop	highway_250	highway	s250	176	site_176
lodz	0.142491	crop	highway_250	highway	s250	177	site_177
lodz	0.11989	crop	highway_250	highway	s250	178	site_178
lodz	0.23072	crop	highway_250	highway	s250	179	site_179
lodz	0.460641	crop	highway_250	highway	s250	180	site_180
lodz	0.078521	crop	highway_250	highway	s250	181	site_181
lodz	0.254601	crop	highway_250	highway	s250	182	site_182
lodz	0.579808	crop	highway_250	highway	s250	183	site_183
lodz	0	crop	highway_250	highway	s250	184	site_184
lodz	0.159235	crop	highway_250	highway	s250	185	site_185
lodz	0.233175	crop	highway_250	highway	s250	186	site_186
lodz	0.163376	crop	highway_250	highway	s250	187	site_187
lodz	0.0946437	crop	highway_250	highway	s250	188	site_188
lodz	0	crop	highway_250	highway	s250	189	site_189
lodz	0.602827	crop	highway_250	highway	s250	190	site_190
lodz	0.168289	crop	highway_250	highway	s250	191	site_191
lodz	0.535822	crop	highway_250	highway	s250	192	site_192
lodz	0.520685	crop	highway_250	highway	s250	193	site_193
lodz	0.235295	crop	highway_250	highway	s250	194	site_194
lodz	0.242617	crop	highway_250	highway	s250	195	site_195
lodz	0.40763	crop	highway_250	highway	s250	196	site_196
lodz	0.0654455	crop	highway_250	highway	s250	197	site_197
lodz	0.000271545	crop	highway_250	highway	s250	198	site_198
lodz	0.559465	crop	highway_250	highway	s250	199	site_199
lodz	0.348031	crop	highway_250	highway	s250	200	site_200
lodz	0.765994	crop	highway_250	highway	s250	201	site_201
lodz	0.481603	crop	highway_250	highway	s250	202	site_202
malo	0.0583097	crop	highway_250	highway	s250	203	site_203
malo	0.102	crop	highway_250	highway	s250	204	site_204
malo	0.27101	crop	highway_250	highway	s250	205	site_205
malo	0.00628247	crop	highway_250	highway	s250	206	site_206
malo	0.361358	crop	highway_250	highway	s250	207	site_207
malo	0.0197434	crop	highway_250	highway	s250	208	site_208
malo	0.0217043	crop	highway_250	highway	s250	209	site_209
malo	0.0970019	crop	highway_250	highway	s250	210	site_210
malo	0.0588506	crop	highway_250	highway	s250	211	site_211
malo	0.00609466	crop	highway_250	highway	s250	212	site_212
malo	0.580365	crop	highway_250	highway	s250	213	site_213
malo	0.094274	crop	highway_250	highway	s250	214	site_214
malo	0.442135	crop	highway_250	highway	s250	215	site_215
malo	0.307514	crop	highway_250	highway	s250	216	site_216
malo	0.519098	crop	highway_250	highway	s250	217	site_217
malo	0	crop	highway_250	highway	s250	218	site_218
malo	0.305124	crop	highway_250	highway	s250	219	site_219
malo	0.286707	crop	highway_250	highway	s250	220	site_220
malo	0.609258	crop	highway_250	highway	s250	221	site_221
malo	0.223302	crop	highway_250	highway	s250	222	site_222
malo	0.000281795	crop	highway_250	highway	s250	223	site_223
malo	0.0507183	crop	highway_250	highway	s250	224	site_224
malo	0	crop	highway_250	highway	s250	225	site_225
malo	0.413381	crop	highway_250	highway	s250	226	site_226
malo	0.0160409	crop	highway_250	highway	s250	227	site_227
maz	0.45801	crop	highway_250	highway	s250	228	site_228
maz	0.534613	crop	highway_250	highway	s250	229	site_229
maz	0.0203311	crop	highway_250	highway	s250	230	site_230
maz	0.075982	crop	highway_250	highway	s250	231	site_231
maz	0.526574	crop	highway_250	highway	s250	232	site_232
maz	0.21398	crop	highway_250	highway	s250	233	site_233
maz	0.229859	crop	highway_250	highway	s250	234	site_234
maz	0.000716862	crop	highway_250	highway	s250	235	site_235
maz	0.458298	crop	highway_250	highway	s250	236	site_236
maz	0	crop	highway_250	highway	s250	237	site_237
maz	0.468257	crop	highway_250	highway	s250	238	site_238
maz	0	crop	highway_250	highway	s250	239	site_239
maz	0	crop	highway_250	highway	s250	240	site_240
maz	0.0496989	crop	highway_250	highway	s250	241	site_241
maz	0	crop	highway_250	highway	s250	242	site_242
maz	0.237611	crop	highway_250	highway	s250	243	site_243
maz	0	crop	highway_250	highway	s250	244	site_244
maz	0.368763	crop	highway_250	highway	s250	245	site_245
maz	0.0473675	crop	highway_250	highway	s250	246	site_246
maz	0.00242024	crop	highway_250	highway	s250	247	site_247
maz	0.00130988	crop	highway_250	highway	s250	248	site_248
maz	0.787096	crop	highway_250	highway	s250	249	site_249
maz	0.0744499	crop	highway_250	highway	s250	250	site_250
maz	0.681125	crop	highway_250	highway	s250	251	site_251
maz	0.0511998	crop	highway_250	highway	s250	252	site_252
maz	0.0450038	crop	highway_250	highway	s250	253	site_253
maz	0	crop	highway_250	highway	s250	254	site_254
maz	0.528565	crop	highway_250	highway	s250	255	site_255
maz	0.650968	crop	highway_250	highway	s250	256	site_256
maz	0.0832851	crop	highway_250	highway	s250	257	site_257
maz	0.00240783	crop	highway_250	highway	s250	258	site_258
maz	0.173568	crop	highway_250	highway	s250	259	site_259
maz	0.835472	crop	highway_250	highway	s250	260	site_260
maz	0.0759288	crop	highway_250	highway	s250	261	site_261
maz	0	crop	highway_250	highway	s250	262	site_262
maz	0.102034	crop	highway_250	highway	s250	263	site_263
maz	0.0195561	crop	highway_250	highway	s250	264	site_264
maz	0	crop	highway_250	highway	s250	265	site_265
maz	0.269513	crop	highway_250	highway	s250	266	site_266
maz	0.0110009	crop	highway_250	highway	s250	267	site_267
maz	0.395883	crop	highway_250	highway	s250	268	site_268
maz	0.407613	crop	highway_250	highway	s250	269	site_269
maz	0.0384636	crop	highway_250	highway	s250	270	site_270
maz	0.274322	crop	highway_250	highway	s250	271	site_271
maz	0	crop	highway_250	highway	s250	272	site_272
maz	0.194743	crop	highway_250	highway	s250	273	site_273
maz	0.064077	crop	highway_250	highway	s250	274	site_274
maz	0.00188612	crop	highway_250	highway	s250	275	site_275
maz	0.248373	crop	highway_250	highway	s250	276	site_276
maz	0.172256	crop	highway_250	highway	s250	277	site_277
maz	0.0260406	crop	highway_250	highway	s250	278	site_278
maz	0.0453007	crop	highway_250	highway	s250	279	site_279
maz	0.225869	crop	highway_250	highway	s250	280	site_280
maz	0.305347	crop	highway_250	highway	s250	281	site_281
maz	0.0131308	crop	highway_250	highway	s250	282	site_282
maz	0.0735693	crop	highway_250	highway	s250	283	site_283
maz	0.0250175	crop	highway_250	highway	s250	284	site_284
maz	0.0946473	crop	highway_250	highway	s250	285	site_285
maz	0.149033	crop	highway_250	highway	s250	286	site_286
maz	0.0361222	crop	highway_250	highway	s250	287	site_287
maz	0.0416317	crop	highway_250	highway	s250	288	site_288
maz	0	crop	highway_250	highway	s250	289	site_289
maz	0.438564	crop	highway_250	highway	s250	290	site_290
maz	0.020168	crop	highway_250	highway	s250	291	site_291
maz	0.643448	crop	highway_250	highway	s250	292	site_292
maz	0.429573	crop	highway_250	highway	s250	293	site_293
maz	0	crop	highway_250	highway	s250	294	site_294
maz	0.848011	crop	highway_250	highway	s250	295	site_295
maz	0.00591905	crop	highway_250	highway	s250	296	site_296
maz	0.320845	crop	highway_250	highway	s250	297	site_297
maz	0.0442408	crop	highway_250	highway	s250	298	site_298
maz	0.804003	crop	highway_250	highway	s250	299	site_299
maz	0.524936	crop	highway_250	highway	s250	300	site_300
opol	0.519058	crop	highway_250	highway	s250	301	site_301
opol	0.590286	crop	highway_250	highway	s250	302	site_302
opol	0.0787188	crop	highway_250	highway	s250	303	site_303
opol	0	crop	highway_250	highway	s250	304	site_304
opol	0.693337	crop	highway_250	highway	s250	305	site_305
opol	0.741382	crop	highway_250	highway	s250	306	site_306
opol	0	crop	highway_250	highway	s250	307	site_307
opol	0.236852	crop	highway_250	highway	s250	308	site_308
opol	0.185136	crop	highway_250	highway	s250	309	site_309
opol	0.827658	crop	highway_250	highway	s250	310	site_310
opol	0.830631	crop	highway_250	highway	s250	311	site_311
podk	0.542077	crop	highway_250	highway	s250	312	site_312
podk	0.0117545	crop	highway_250	highway	s250	313	site_313
podk	0.00242768	crop	highway_250	highway	s250	314	site_314
podk	0.00281391	crop	highway_250	highway	s250	315	site_315
podk	0.0117038	crop	highway_250	highway	s250	316	site_316
podk	0	crop	highway_250	highway	s250	317	site_317
podk	0.685817	crop	highway_250	highway	s250	318	site_318
podk	0.0451386	crop	highway_250	highway	s250	319	site_319
podk	0.209314	crop	highway_250	highway	s250	320	site_320
podk	0.0409663	crop	highway_250	highway	s250	321	site_321
podk	0.0276735	crop	highway_250	highway	s250	322	site_322
podk	0.488417	crop	highway_250	highway	s250	323	site_323
podk	0.343125	crop	highway_250	highway	s250	324	site_324
podk	0.0079505	crop	highway_250	highway	s250	325	site_325
podk	0.723453	crop	highway_250	highway	s250	326	site_326
podk	0.184025	crop	highway_250	highway	s250	327	site_327
podk	0.350772	crop	highway_250	highway	s250	328	site_328
podk	0.204251	crop	highway_250	highway	s250	329	site_329
podk	0.546456	crop	highway_250	highway	s250	330	site_330
podk	0.663295	crop	highway_250	highway	s250	331	site_331
podk	0.376135	crop	highway_250	highway	s250	332	site_332
podk	0.183408	crop	highway_250	highway	s250	333	site_333
podk	2.19598e-05	crop	highway_250	highway	s250	334	site_334
podk	0.523768	crop	highway_250	highway	s250	335	site_335
podk	0.542193	crop	highway_250	highway	s250	336	site_336
podk	0.0736462	crop	highway_250	highway	s250	337	site_337
podk	0	crop	highway_250	highway	s250	338	site_338
podl	0.0403048	crop	highway_250	highway	s250	339	site_339
podl	0.595532	crop	highway_250	highway	s250	340	site_340
podl	0.408922	crop	highway_250	highway	s250	341	site_341
podl	0.309393	crop	highway_250	highway	s250	342	site_342
podl	0.752729	crop	highway_250	highway	s250	343	site_343
podl	0.4533	crop	highway_250	highway	s250	344	site_344
podl	0.067238	crop	highway_250	highway	s250	345	site_345
podl	0.692809	crop	highway_250	highway	s250	346	site_346
podl	0.415295	crop	highway_250	highway	s250	347	site_347
podl	0.0658063	crop	highway_250	highway	s250	348	site_348
podl	0.497783	crop	highway_250	highway	s250	349	site_349
podl	0.597198	crop	highway_250	highway	s250	350	site_350
podl	0.239236	crop	highway_250	highway	s250	351	site_351
podl	0.733304	crop	highway_250	highway	s250	352	site_352
podl	0.367355	crop	highway_250	highway	s250	353	site_353
podl	0.4998	crop	highway_250	highway	s250	354	site_354
podl	0.745436	crop	highway_250	highway	s250	355	site_355
podl	0.384354	crop	highway_250	highway	s250	356	site_356
podl	0.460352	crop	highway_250	highway	s250	357	site_357
podl	0.178818	crop	highway_250	highway	s250	358	site_358
podl	0.473867	crop	highway_250	highway	s250	359	site_359
podl	0.713683	crop	highway_250	highway	s250	360	site_360
podl	0.0989597	crop	highway_250	highway	s250	361	site_361
podl	0.600455	crop	highway_250	highway	s250	362	site_362
podl	0.0437285	crop	highway_250	highway	s250	363	site_363
podl	0.105693	crop	highway_250	highway	s250	364	site_364
pom	0.392426	crop	highway_250	highway	s250	365	site_365
pom	0.594312	crop	highway_250	highway	s250	366	site_366
pom	0.38211	crop	highway_250	highway	s250	367	site_367
pom	0.584931	crop	highway_250	highway	s250	368	site_368
pom	0.403442	crop	highway_250	highway	s250	369	site_369
pom	0	crop	highway_250	highway	s250	370	site_370
pom	0.761534	crop	highway_250	highway	s250	371	site_371
pom	0.00241008	crop	highway_250	highway	s250	372	site_372
pom	0.394862	crop	highway_250	highway	s250	373	site_373
pom	0.0109277	crop	highway_250	highway	s250	374	site_374
pom	0.734094	crop	highway_250	highway	s250	375	site_375
pom	0.599553	crop	highway_250	highway	s250	376	site_376
pom	0.667744	crop	highway_250	highway	s250	377	site_377
pom	0.73956	crop	highway_250	highway	s250	378	site_378
pom	0.238189	crop	highway_250	highway	s250	379	site_379
pom	0.486062	crop	highway_250	highway	s250	380	site_380
pom	0.00791729	crop	highway_250	highway	s250	381	site_381
pom	0.472949	crop	highway_250	highway	s250	382	site_382
pom	0.00666687	crop	highway_250	highway	s250	383	site_383
pom	0	crop	highway_250	highway	s250	384	site_384
slas	0.0247807	crop	highway_250	highway	s250	385	site_385
slas	0.117561	crop	highway_250	highway	s250	386	site_386
slas	0.0491765	crop	highway_250	highway	s250	387	site_387
slas	0	crop	highway_250	highway	s250	388	site_388
slas	0.531733	crop	highway_250	highway	s250	389	site_389
slas	0.0760774	crop	highway_250	highway	s250	390	site_390
slas	0.0087954	crop	highway_250	highway	s250	391	site_391
slas	0.234507	crop	highway_250	highway	s250	392	site_392
slas	0.598518	crop	highway_250	highway	s250	393	site_393
slas	0.631523	crop	highway_250	highway	s250	394	site_394
slas	0.00168046	crop	highway_250	highway	s250	395	site_395
slas	0.586027	crop	highway_250	highway	s250	396	site_396
slas	0.110952	crop	highway_250	highway	s250	397	site_397
slas	0.204237	crop	highway_250	highway	s250	398	site_398
slas	0.016074	crop	highway_250	highway	s250	399	site_399
slas	0	crop	highway_250	highway	s250	400	site_400
slas	0.0749462	crop	highway_250	highway	s250	401	site_401
slas	0.253158	crop	highway_250	highway	s250	402	site_402
slas	0.0025232	crop	highway_250	highway	s250	403	site_403
slas	0	crop	highway_250	highway	s250	404	site_404
slas	0.238824	crop	highway_250	highway	s250	405	site_405
slas	0.0450157	crop	highway_250	highway	s250	406	site_406
slas	0	crop	highway_250	highway	s250	407	site_407
slas	0.0133166	crop	highway_250	highway	s250	408	site_408
slas	0.400761	crop	highway_250	highway	s250	409	site_409
slas	0.259236	crop	highway_250	highway	s250	410	site_410
slas	0.171655	crop	highway_250	highway	s250	411	site_411
slas	0.00168143	crop	highway_250	highway	s250	412	site_412
slas	0.0892412	crop	highway_250	highway	s250	413	site_413
slas	0.48598	crop	highway_250	highway	s250	414	site_414
slas	0.00169816	crop	highway_250	highway	s250	415	site_415
slas	0.0377582	crop	highway_250	highway	s250	416	site_416
slas	0	crop	highway_250	highway	s250	417	site_417
slas	0.208821	crop	highway_250	highway	s250	418	site_418
slas	0	crop	highway_250	highway	s250	419	site_419
slas	0.181458	crop	highway_250	highway	s250	420	site_420
slas	0.00549786	crop	highway_250	highway	s250	421	site_421
slas	0.000280922	crop	highway_250	highway	s250	422	site_422
slas	0.545938	crop	highway_250	highway	s250	423	site_423
slas	0.394905	crop	highway_250	highway	s250	424	site_424
slas	0.465036	crop	highway_250	highway	s250	425	site_425
slas	0.0351238	crop	highway_250	highway	s250	426	site_426
slas	0	crop	highway_250	highway	s250	427	site_427
slas	0.383305	crop	highway_250	highway	s250	428	site_428
slas	0	crop	highway_250	highway	s250	429	site_429
slas	0.0298376	crop	highway_250	highway	s250	430	site_430
swiet	0.0019391	crop	highway_250	highway	s250	431	site_431
swiet	0	crop	highway_250	highway	s250	432	site_432
swiet	0.0246373	crop	highway_250	highway	s250	433	site_433
swiet	0	crop	highway_250	highway	s250	434	site_434
swiet	0.85098	crop	highway_250	highway	s250	435	site_435
swiet	0.372104	crop	highway_250	highway	s250	436	site_436
swiet	0.00693302	crop	highway_250	highway	s250	437	site_437
swiet	0.000553562	crop	highway_250	highway	s250	438	site_438
swiet	0.01683	crop	highway_250	highway	s250	439	site_439
swiet	0.19825	crop	highway_250	highway	s250	440	site_440
swiet	0.00168121	crop	highway_250	highway	s250	441	site_441
swiet	0.729266	crop	highway_250	highway	s250	442	site_442
warm	0	crop	highway_250	highway	s250	443	site_443
warm	0.369997	crop	highway_250	highway	s250	444	site_444
warm	0	crop	highway_250	highway	s250	445	site_445
warm	0.769044	crop	highway_250	highway	s250	446	site_446
warm	0.520963	crop	highway_250	highway	s250	447	site_447
warm	0.529841	crop	highway_250	highway	s250	448	site_448
warm	0	crop	highway_250	highway	s250	449	site_449
warm	0.158388	crop	highway_250	highway	s250	450	site_450
warm	0	crop	highway_250	highway	s250	451	site_451
warm	0.0682304	crop	highway_250	highway	s250	452	site_452
warm	0.187455	crop	highway_250	highway	s250	453	site_453
warm	0.731834	crop	highway_250	highway	s250	454	site_454
warm	0.551637	crop	highway_250	highway	s250	455	site_455
warm	0.812843	crop	highway_250	highway	s250	456	site_456
warm	0.463186	crop	highway_250	highway	s250	457	site_457
warm	0.383676	crop	highway_250	highway	s250	458	site_458
warm	0	crop	highway_250	highway	s250	459	site_459
warm	0.261017	crop	highway_250	highway	s250	460	site_460
warm	0.35924	crop	highway_250	highway	s250	461	site_461
warm	0.529218	crop	highway_250	highway	s250	462	site_462
warm	0.228329	crop	highway_250	highway	s250	463	site_463
warm	0.291455	crop	highway_250	highway	s250	464	site_464
warm	0.542928	crop	highway_250	highway	s250	465	site_465
warm	0	crop	highway_250	highway	s250	466	site_466
warm	0	crop	highway_250	highway	s250	467	site_467
warm	0.315108	crop	highway_250	highway	s250	468	site_468
warm	0.179064	crop	highway_250	highway	s250	469	site_469
warm	0.0779867	crop	highway_250	highway	s250	470	site_470
warm	0	crop	highway_250	highway	s250	471	site_471
warm	0.000413827	crop	highway_250	highway	s250	472	site_472
warm	0.0820276	crop	highway_250	highway	s250	473	site_473
warm	0.76798	crop	highway_250	highway	s250	474	site_474
warm	0	crop	highway_250	highway	s250	475	site_475
warm	0.507543	crop	highway_250	highway	s250	476	site_476
warm	0.504107	crop	highway_250	highway	s250	477	site_477
wielko	0.761698	crop	highway_250	highway	s250	478	site_478
wielko	0.715	crop	highway_250	highway	s250	479	site_479
wielko	0.798951	crop	highway_250	highway	s250	480	site_480
wielko	0	crop	highway_250	highway	s250	481	site_481
wielko	0.146766	crop	highway_250	highway	s250	482	site_482
wielko	0.690372	crop	highway_250	highway	s250	483	site_483
wielko	0.593627	crop	highway_250	highway	s250	484	site_484
wielko	0.00136329	crop	highway_250	highway	s250	485	site_485
wielko	0.158882	crop	highway_250	highway	s250	486	site_486
wielko	0.34406	crop	highway_250	highway	s250	487	site_487
wielko	0.709274	crop	highway_250	highway	s250	488	site_488
wielko	0.0454791	crop	highway_250	highway	s250	489	site_489
wielko	0.669458	crop	highway_250	highway	s250	490	site_490
wielko	0.455974	crop	highway_250	highway	s250	491	site_491
wielko	0.632576	crop	highway_250	highway	s250	492	site_492
wielko	0.760619	crop	highway_250	highway	s250	493	site_493
wielko	0.563388	crop	highway_250	highway	s250	494	site_494
wielko	0	crop	highway_250	highway	s250	495	site_495
wielko	0.762423	crop	highway_250	highway	s250	496	site_496
wielko	0.0525913	crop	highway_250	highway	s250	497	site_497
wielko	0.770358	crop	highway_250	highway	s250	498	site_498
wielko	0.531525	crop	highway_250	highway	s250	499	site_499
wielko	0.401854	crop	highway_250	highway	s250	500	site_500
wielko	0.831404	crop	highway_250	highway	s250	501	site_501
wielko	0.751045	crop	highway_250	highway	s250	502	site_502
wielko	0.599124	crop	highway_250	highway	s250	503	site_503
wielko	0	crop	highway_250	highway	s250	504	site_504
wielko	0.655941	crop	highway_250	highway	s250	505	site_505
wielko	0.246482	crop	highway_250	highway	s250	506	site_506
wielko	0.126127	crop	highway_250	highway	s250	507	site_507
wielko	0.0269714	crop	highway_250	highway	s250	508	site_508
wielko	0.052934	crop	highway_250	highway	s250	509	site_509
wielko	0.578856	crop	highway_250	highway	s250	510	site_510
wielko	0.0367408	crop	highway_250	highway	s250	511	site_511
wielko	0.737859	crop	highway_250	highway	s250	512	site_512
wielko	0.490974	crop	highway_250	highway	s250	513	site_513
wielko	0.11366	crop	highway_250	highway	s250	514	site_514
wielko	0.710417	crop	highway_250	highway	s250	515	site_515
wielko	0.617993	crop	highway_250	highway	s250	516	site_516
wielko	0.760279	crop	highway_250	highway	s250	517	site_517
wielko	0.137864	crop	highway_250	highway	s250	518	site_518
wielko	0.656119	crop	highway_250	highway	s250	519	site_519
wielko	0.693294	crop	highway_250	highway	s250	520	site_520
wielko	0.278911	crop	highway_250	highway	s250	521	site_521
wielko	0.70138	crop	highway_250	highway	s250	522	site_522
wielko	0.73247	crop	highway_250	highway	s250	523	site_523
wielko	0	crop	highway_250	highway	s250	524	site_524
wielko	0.77196	crop	highway_250	highway	s250	525	site_525
wielko	0.382339	crop	highway_250	highway	s250	526	site_526
wielko	0.791435	crop	highway_250	highway	s250	527	site_527
wielko	0.1511	crop	highway_250	highway	s250	528	site_528
wielko	0.247176	crop	highway_250	highway	s250	529	site_529
wielko	0.724795	crop	highway_250	highway	s250	530	site_530
wielko	0.581806	crop	highway_250	highway	s250	531	site_531
wielko	0.618337	crop	highway_250	highway	s250	532	site_532
zachpom	0.6462	crop	highway_250	highway	s250	533	site_533
zachpom	0.544396	crop	highway_250	highway	s250	534	site_534
zachpom	0.0791455	crop	highway_250	highway	s250	535	site_535
zachpom	0.12847	crop	highway_250	highway	s250	536	site_536
zachpom	0.0828605	crop	highway_250	highway	s250	537	site_537
zachpom	0.751926	crop	highway_250	highway	s250	538	site_538
zachpom	0.791955	crop	highway_250	highway	s250	539	site_539
zachpom	0.389375	crop	highway_250	highway	s250	540	site_540
zachpom	0	crop	highway_250	highway	s250	541	site_541
zachpom	0	crop	highway_250	highway	s250	542	site_542
zachpom	0	crop	highway_250	highway	s250	543	site_543
zachpom	0.419664	crop	highway_250	highway	s250	544	site_544
zachpom	0.840814	crop	highway_250	highway	s250	545	site_545
zachpom	0.636154	crop	highway_250	highway	s250	546	site_546
zachpom	0.468443	crop	highway_250	highway	s250	547	site_547
zachpom	0	crop	highway_250	highway	s250	548	site_548
zachpom	0.573938	crop	highway_250	highway	s250	549	site_549
zachpom	0.12638	crop	highway_250	highway	s250	550	site_550
zachpom	0.691099	crop	highway_250	highway	s250	551	site_551
zachpom	0.796163	crop	highway_250	highway	s250	552	site_552
zachpom	0.339918	crop	highway_250	highway	s250	553	site_553
zachpom	0.645985	crop	highway_250	highway	s250	554	site_554
zachpom	0	crop	highway_250	highway	s250	555	site_555
zachpom	0.150047	crop	highway_250	highway	s250	556	site_556
zachpom	0.788877	crop	highway_250	highway	s250	557	site_557
zachpom	0	crop	highway_250	highway	s250	558	site_558
zachpom	0	crop	highway_250	highway	s250	559	site_559
zachpom	0.163349	crop	highway_250	highway	s250	560	site_560
zachpom	0	crop	highway_250	highway	s250	561	site_561
zachpom	0.433608	crop	highway_250	highway	s250	562	site_562
zachpom	0.16631	crop	highway_250	highway	s250	563	site_563
zachpom	0.0894579	crop	highway_250	highway	s250	564	site_564
zachpom	0.695117	crop	highway_250	highway	s250	565	site_565
zachpom	0.201799	crop	highway_250	highway	s250	566	site_566
zachpom	0.366825	crop	highway_250	highway	s250	567	site_567
zachpom	0.343398	crop	highway_250	highway	s250	568	site_568
zachpom	0.239648	crop	highway_250	highway	s250	569	site_569
zachpom	0.048198	crop	highway_250	highway	s250	570	site_570
zachpom	0.727251	crop	highway_250	highway	s250	571	site_571
zachpom	0.706554	crop	highway_250	highway	s250	572	site_572
zachpom	0.748391	crop	highway_250	highway	s250	573	site_573
dolno	0.076854	built	highway_250	highway	s250	1	site_1
dolno	0.203457	built	highway_250	highway	s250	2	site_2
dolno	0.101312	built	highway_250	highway	s250	3	site_3
dolno	0.0934423	built	highway_250	highway	s250	4	site_4
dolno	0.0951729	built	highway_250	highway	s250	5	site_5
dolno	0.100996	built	highway_250	highway	s250	6	site_6
dolno	0	built	highway_250	highway	s250	7	site_7
dolno	0.142243	built	highway_250	highway	s250	8	site_8
dolno	0.0855394	built	highway_250	highway	s250	9	site_9
dolno	0.121921	built	highway_250	highway	s250	10	site_10
dolno	0	built	highway_250	highway	s250	11	site_11
dolno	0.0862959	built	highway_250	highway	s250	12	site_12
dolno	0.290857	built	highway_250	highway	s250	13	site_13
dolno	0.0965056	built	highway_250	highway	s250	14	site_14
dolno	0.0994789	built	highway_250	highway	s250	15	site_15
dolno	0.090702	built	highway_250	highway	s250	16	site_16
dolno	0.326237	built	highway_250	highway	s250	17	site_17
dolno	0.0824182	built	highway_250	highway	s250	18	site_18
dolno	0.0984108	built	highway_250	highway	s250	19	site_19
dolno	0.254688	built	highway_250	highway	s250	20	site_20
dolno	0.112307	built	highway_250	highway	s250	21	site_21
dolno	0.0946648	built	highway_250	highway	s250	22	site_22
dolno	0.151326	built	highway_250	highway	s250	23	site_23
dolno	0	built	highway_250	highway	s250	24	site_24
dolno	0.0975457	built	highway_250	highway	s250	25	site_25
dolno	0.238755	built	highway_250	highway	s250	26	site_26
dolno	0.0734514	built	highway_250	highway	s250	27	site_27
dolno	0.0747114	built	highway_250	highway	s250	28	site_28
dolno	0.0874975	built	highway_250	highway	s250	29	site_29
dolno	0.174445	built	highway_250	highway	s250	30	site_30
dolno	0.0176664	built	highway_250	highway	s250	31	site_31
dolno	0.104031	built	highway_250	highway	s250	32	site_32
dolno	0.0997166	built	highway_250	highway	s250	33	site_33
dolno	0.225951	built	highway_250	highway	s250	34	site_34
dolno	0.0914259	built	highway_250	highway	s250	35	site_35
dolno	0.157358	built	highway_250	highway	s250	36	site_36
dolno	0.0856317	built	highway_250	highway	s250	37	site_37
dolno	0.0733262	built	highway_250	highway	s250	38	site_38
dolno	0.0970883	built	highway_250	highway	s250	39	site_39
dolno	0.104908	built	highway_250	highway	s250	40	site_40
dolno	0.147502	built	highway_250	highway	s250	41	site_41
dolno	0.107377	built	highway_250	highway	s250	42	site_42
dolno	0.132821	built	highway_250	highway	s250	43	site_43
dolno	0.0837545	built	highway_250	highway	s250	44	site_44
dolno	0.0850882	built	highway_250	highway	s250	45	site_45
dolno	0.417563	built	highway_250	highway	s250	46	site_46
dolno	0.260653	built	highway_250	highway	s250	47	site_47
dolno	0.10016	built	highway_250	highway	s250	48	site_48
dolno	0.081884	built	highway_250	highway	s250	49	site_49
dolno	0.130286	built	highway_250	highway	s250	50	site_50
dolno	0.094529	built	highway_250	highway	s250	51	site_51
dolno	0.137715	built	highway_250	highway	s250	52	site_52
dolno	0.140598	built	highway_250	highway	s250	53	site_53
dolno	0.157026	built	highway_250	highway	s250	54	site_54
dolno	0.130449	built	highway_250	highway	s250	55	site_55
dolno	0.140037	built	highway_250	highway	s250	56	site_56
dolno	0.0813256	built	highway_250	highway	s250	57	site_57
kujaw	0.130249	built	highway_250	highway	s250	58	site_58
kujaw	0.152796	built	highway_250	highway	s250	59	site_59
kujaw	0.134904	built	highway_250	highway	s250	60	site_60
kujaw	0.0813768	built	highway_250	highway	s250	61	site_61
kujaw	0.161576	built	highway_250	highway	s250	62	site_62
kujaw	0.571636	built	highway_250	highway	s250	63	site_63
kujaw	0.263931	built	highway_250	highway	s250	64	site_64
kujaw	0.0852379	built	highway_250	highway	s250	65	site_65
kujaw	0.15382	built	highway_250	highway	s250	66	site_66
kujaw	0.0946697	built	highway_250	highway	s250	67	site_67
kujaw	0.0990507	built	highway_250	highway	s250	68	site_68
kujaw	0.104009	built	highway_250	highway	s250	69	site_69
kujaw	0.107127	built	highway_250	highway	s250	70	site_70
kujaw	0.280942	built	highway_250	highway	s250	71	site_71
kujaw	0.103471	built	highway_250	highway	s250	72	site_72
kujaw	0.0453677	built	highway_250	highway	s250	73	site_73
kujaw	0.148448	built	highway_250	highway	s250	74	site_74
kujaw	0.10864	built	highway_250	highway	s250	75	site_75
kujaw	0.0914414	built	highway_250	highway	s250	76	site_76
kujaw	0.314063	built	highway_250	highway	s250	77	site_77
kujaw	0.106596	built	highway_250	highway	s250	78	site_78
kujaw	0.125906	built	highway_250	highway	s250	79	site_79
kujaw	0.195701	built	highway_250	highway	s250	80	site_80
kujaw	0.091525	built	highway_250	highway	s250	81	site_81
kujaw	0.266619	built	highway_250	highway	s250	82	site_82
kujaw	0.185329	built	highway_250	highway	s250	83	site_83
kujaw	0.247955	built	highway_250	highway	s250	84	site_84
kujaw	0.18418	built	highway_250	highway	s250	85	site_85
kujaw	0.0918823	built	highway_250	highway	s250	86	site_86
kujaw	0.149621	built	highway_250	highway	s250	87	site_87
kujaw	0.0928378	built	highway_250	highway	s250	88	site_88
kujaw	0.119797	built	highway_250	highway	s250	89	site_89
kujaw	0.171293	built	highway_250	highway	s250	90	site_90
lubel	0.31708	built	highway_250	highway	s250	91	site_91
lubel	0.418962	built	highway_250	highway	s250	92	site_92
lubel	0.152838	built	highway_250	highway	s250	93	site_93
lubel	0.245311	built	highway_250	highway	s250	94	site_94
lubel	0.119462	built	highway_250	highway	s250	95	site_95
lubel	0.183428	built	highway_250	highway	s250	96	site_96
lubel	0.293428	built	highway_250	highway	s250	97	site_97
lubel	0.153754	built	highway_250	highway	s250	98	site_98
lubel	0	built	highway_250	highway	s250	99	site_99
lubel	0.106884	built	highway_250	highway	s250	100	site_100
lubel	0.263648	built	highway_250	highway	s250	101	site_101
lubel	0.174803	built	highway_250	highway	s250	102	site_102
lubel	0.419533	built	highway_250	highway	s250	103	site_103
lubel	0.166335	built	highway_250	highway	s250	104	site_104
lubel	0.1488	built	highway_250	highway	s250	105	site_105
lubel	0.315955	built	highway_250	highway	s250	106	site_106
lubel	0.291617	built	highway_250	highway	s250	107	site_107
lubel	0.189443	built	highway_250	highway	s250	108	site_108
lubel	0.141849	built	highway_250	highway	s250	109	site_109
lubel	0.0712663	built	highway_250	highway	s250	110	site_110
lubel	0.011041	built	highway_250	highway	s250	111	site_111
lubel	0.0144841	built	highway_250	highway	s250	112	site_112
lubel	0.17746	built	highway_250	highway	s250	113	site_113
lubel	0.12981	built	highway_250	highway	s250	114	site_114
lubel	0.139055	built	highway_250	highway	s250	115	site_115
lubu	0.0996368	built	highway_250	highway	s250	116	site_116
lubu	0.133507	built	highway_250	highway	s250	117	site_117
lubu	0.100724	built	highway_250	highway	s250	118	site_118
lubu	0.159781	built	highway_250	highway	s250	119	site_119
lubu	0.100664	built	highway_250	highway	s250	120	site_120
lubu	0.0859983	built	highway_250	highway	s250	121	site_121
lubu	0.0969344	built	highway_250	highway	s250	122	site_122
lubu	0.111495	built	highway_250	highway	s250	123	site_123
lubu	0.14997	built	highway_250	highway	s250	124	site_124
lubu	0.101651	built	highway_250	highway	s250	125	site_125
lubu	0.219358	built	highway_250	highway	s250	126	site_126
lubu	0.091881	built	highway_250	highway	s250	127	site_127
lubu	0.153824	built	highway_250	highway	s250	128	site_128
lubu	0.107777	built	highway_250	highway	s250	129	site_129
lubu	0.0995421	built	highway_250	highway	s250	130	site_130
lubu	0.117063	built	highway_250	highway	s250	131	site_131
lubu	0.434771	built	highway_250	highway	s250	132	site_132
lubu	0.106968	built	highway_250	highway	s250	133	site_133
lubu	0.144812	built	highway_250	highway	s250	134	site_134
lubu	0.16704	built	highway_250	highway	s250	135	site_135
lubu	0.0903415	built	highway_250	highway	s250	136	site_136
lubu	0.085412	built	highway_250	highway	s250	137	site_137
lubu	0.0861486	built	highway_250	highway	s250	138	site_138
lubu	0.110987	built	highway_250	highway	s250	139	site_139
lubu	0.206585	built	highway_250	highway	s250	140	site_140
lubu	0.108904	built	highway_250	highway	s250	141	site_141
lubu	0.130521	built	highway_250	highway	s250	142	site_142
lubu	0.0890652	built	highway_250	highway	s250	143	site_143
lubu	0.0987802	built	highway_250	highway	s250	144	site_144
lubu	0.121235	built	highway_250	highway	s250	145	site_145
lubu	0.134942	built	highway_250	highway	s250	146	site_146
lodz	0.15467	built	highway_250	highway	s250	147	site_147
lodz	0.0478429	built	highway_250	highway	s250	148	site_148
lodz	0.0122923	built	highway_250	highway	s250	149	site_149
lodz	0.2318	built	highway_250	highway	s250	150	site_150
lodz	0.226308	built	highway_250	highway	s250	151	site_151
lodz	0.0998937	built	highway_250	highway	s250	152	site_152
lodz	0.194827	built	highway_250	highway	s250	153	site_153
lodz	0.141049	built	highway_250	highway	s250	154	site_154
lodz	0	built	highway_250	highway	s250	155	site_155
lodz	0.257095	built	highway_250	highway	s250	156	site_156
lodz	0.114547	built	highway_250	highway	s250	157	site_157
lodz	0.15347	built	highway_250	highway	s250	158	site_158
lodz	0.162739	built	highway_250	highway	s250	159	site_159
lodz	0.118597	built	highway_250	highway	s250	160	site_160
lodz	0.192711	built	highway_250	highway	s250	161	site_161
lodz	0.126365	built	highway_250	highway	s250	162	site_162
lodz	0.121956	built	highway_250	highway	s250	163	site_163
lodz	0.344298	built	highway_250	highway	s250	164	site_164
lodz	0.108099	built	highway_250	highway	s250	165	site_165
lodz	0.135174	built	highway_250	highway	s250	166	site_166
lodz	0.13158	built	highway_250	highway	s250	167	site_167
lodz	0.109552	built	highway_250	highway	s250	168	site_168
lodz	0.163239	built	highway_250	highway	s250	169	site_169
lodz	0.358288	built	highway_250	highway	s250	170	site_170
lodz	0.100678	built	highway_250	highway	s250	171	site_171
lodz	0.219037	built	highway_250	highway	s250	172	site_172
lodz	0.289049	built	highway_250	highway	s250	173	site_173
lodz	0.308424	built	highway_250	highway	s250	174	site_174
lodz	0.16778	built	highway_250	highway	s250	175	site_175
lodz	0.134416	built	highway_250	highway	s250	176	site_176
lodz	0.126603	built	highway_250	highway	s250	177	site_177
lodz	0.170946	built	highway_250	highway	s250	178	site_178
lodz	0.192558	built	highway_250	highway	s250	179	site_179
lodz	0.130137	built	highway_250	highway	s250	180	site_180
lodz	0.298687	built	highway_250	highway	s250	181	site_181
lodz	0.0351801	built	highway_250	highway	s250	182	site_182
lodz	0.224617	built	highway_250	highway	s250	183	site_183
lodz	0.11271	built	highway_250	highway	s250	184	site_184
lodz	0.132524	built	highway_250	highway	s250	185	site_185
lodz	0.333898	built	highway_250	highway	s250	186	site_186
lodz	0.364738	built	highway_250	highway	s250	187	site_187
lodz	0.181741	built	highway_250	highway	s250	188	site_188
lodz	0.142871	built	highway_250	highway	s250	189	site_189
lodz	0.124888	built	highway_250	highway	s250	190	site_190
lodz	0.104706	built	highway_250	highway	s250	191	site_191
lodz	0.0786595	built	highway_250	highway	s250	192	site_192
lodz	0.117933	built	highway_250	highway	s250	193	site_193
lodz	0.339766	built	highway_250	highway	s250	194	site_194
lodz	0.223336	built	highway_250	highway	s250	195	site_195
lodz	0.249748	built	highway_250	highway	s250	196	site_196
lodz	0.122259	built	highway_250	highway	s250	197	site_197
lodz	0.172038	built	highway_250	highway	s250	198	site_198
lodz	0.189052	built	highway_250	highway	s250	199	site_199
lodz	0.101354	built	highway_250	highway	s250	200	site_200
lodz	0.126079	built	highway_250	highway	s250	201	site_201
lodz	0.163862	built	highway_250	highway	s250	202	site_202
malo	0.0774901	built	highway_250	highway	s250	203	site_203
malo	0.16238	built	highway_250	highway	s250	204	site_204
malo	0.141916	built	highway_250	highway	s250	205	site_205
malo	0.23453	built	highway_250	highway	s250	206	site_206
malo	0.176926	built	highway_250	highway	s250	207	site_207
malo	0.132318	built	highway_250	highway	s250	208	site_208
malo	0.284135	built	highway_250	highway	s250	209	site_209
malo	0.172455	built	highway_250	highway	s250	210	site_210
malo	0.244255	built	highway_250	highway	s250	211	site_211
malo	0.0952601	built	highway_250	highway	s250	212	site_212
malo	0.128856	built	highway_250	highway	s250	213	site_213
malo	0.119984	built	highway_250	highway	s250	214	site_214
malo	0.103002	built	highway_250	highway	s250	215	site_215
malo	0.223255	built	highway_250	highway	s250	216	site_216
malo	0.117328	built	highway_250	highway	s250	217	site_217
malo	0.11298	built	highway_250	highway	s250	218	site_218
malo	0.0943579	built	highway_250	highway	s250	219	site_219
malo	0.282315	built	highway_250	highway	s250	220	site_220
malo	0.120501	built	highway_250	highway	s250	221	site_221
malo	0.106264	built	highway_250	highway	s250	222	site_222
malo	0.220027	built	highway_250	highway	s250	223	site_223
malo	0.122866	built	highway_250	highway	s250	224	site_224
malo	0.132342	built	highway_250	highway	s250	225	site_225
malo	0.128138	built	highway_250	highway	s250	226	site_226
malo	0.100284	built	highway_250	highway	s250	227	site_227
maz	0.160983	built	highway_250	highway	s250	228	site_228
maz	0.171029	built	highway_250	highway	s250	229	site_229
maz	0	built	highway_250	highway	s250	230	site_230
maz	0.187056	built	highway_250	highway	s250	231	site_231
maz	0.153782	built	highway_250	highway	s250	232	site_232
maz	0.017778	built	highway_250	highway	s250	233	site_233
maz	0.259286	built	highway_250	highway	s250	234	site_234
maz	0.524375	built	highway_250	highway	s250	235	site_235
maz	0.239343	built	highway_250	highway	s250	236	site_236
maz	0.59695	built	highway_250	highway	s250	237	site_237
maz	0.170887	built	highway_250	highway	s250	238	site_238
maz	0.184811	built	highway_250	highway	s250	239	site_239
maz	0.120348	built	highway_250	highway	s250	240	site_240
maz	0.266903	built	highway_250	highway	s250	241	site_241
maz	0.140712	built	highway_250	highway	s250	242	site_242
maz	0.0923115	built	highway_250	highway	s250	243	site_243
maz	0.146767	built	highway_250	highway	s250	244	site_244
maz	0.10381	built	highway_250	highway	s250	245	site_245
maz	0.230364	built	highway_250	highway	s250	246	site_246
maz	0.171175	built	highway_250	highway	s250	247	site_247
maz	0.2079	built	highway_250	highway	s250	248	site_248
maz	0.134577	built	highway_250	highway	s250	249	site_249
maz	0.0275876	built	highway_250	highway	s250	250	site_250
maz	0.00555403	built	highway_250	highway	s250	251	site_251
maz	0.323147	built	highway_250	highway	s250	252	site_252
maz	0.249089	built	highway_250	highway	s250	253	site_253
maz	0.148574	built	highway_250	highway	s250	254	site_254
maz	0.146108	built	highway_250	highway	s250	255	site_255
maz	0	built	highway_250	highway	s250	256	site_256
maz	0.329809	built	highway_250	highway	s250	257	site_257
maz	0.249943	built	highway_250	highway	s250	258	site_258
maz	0.140249	built	highway_250	highway	s250	259	site_259
maz	0.0916044	built	highway_250	highway	s250	260	site_260
maz	0.100211	built	highway_250	highway	s250	261	site_261
maz	0	built	highway_250	highway	s250	262	site_262
maz	0.236327	built	highway_250	highway	s250	263	site_263
maz	0.175658	built	highway_250	highway	s250	264	site_264
maz	0.18848	built	highway_250	highway	s250	265	site_265
maz	0.134694	built	highway_250	highway	s250	266	site_266
maz	0.562187	built	highway_250	highway	s250	267	site_267
maz	0.121396	built	highway_250	highway	s250	268	site_268
maz	0.000833718	built	highway_250	highway	s250	269	site_269
maz	0.24763	built	highway_250	highway	s250	270	site_270
maz	0.448116	built	highway_250	highway	s250	271	site_271
maz	0.127018	built	highway_250	highway	s250	272	site_272
maz	0.108423	built	highway_250	highway	s250	273	site_273
maz	0.17194	built	highway_250	highway	s250	274	site_274
maz	0.224297	built	highway_250	highway	s250	275	site_275
maz	0.0993388	built	highway_250	highway	s250	276	site_276
maz	0.285161	built	highway_250	highway	s250	277	site_277
maz	0.155675	built	highway_250	highway	s250	278	site_278
maz	0.283973	built	highway_250	highway	s250	279	site_279
maz	0.129512	built	highway_250	highway	s250	280	site_280
[truncated: 155,501 more rows]

## Sheet: simpson_highway
ID_site	tree_250	grass_250	crop_250	built_250	bare_250	water_250	wetland_250
site_1	0.587038	0.0374675	0.298641	0.076854	0	0	0
site_2	0.0558621	0.52235	0.218331	0.203457	0	0	0
site_3	0.275023	0.38263	0.215459	0.101312	0	0.0255752	0
site_4	0	0.0127333	0.893824	0.0934423	0	0	0
site_5	0.0821567	0.150655	0.672015	0.0951729	0	0	0
site_6	0.00218053	0.0530957	0.843728	0.100996	0	0	0
site_7	0.408522	0.341472	0.170433	0	0.0795725	0	0
site_8	1.17151e-05	0.409112	0.442602	0.142243	0	0.00603157	0
site_9	0.808727	0.105733	0	0.0855394	0	0	0
site_10	0.789762	0.0883169	0	0.121921	0	0	0
site_11	0.109178	0.0180114	0.771063	0	0.101747	0	0
site_12	0.383768	0.064799	0.465138	0.0862959	0	0	0
site_13	0.153205	0.226746	0.317149	0.290857	0.0120438	0	0
site_14	0.00082425	0.149126	0.753544	0.0965056	0	0	0
site_15	0.00678928	0.0547904	0.838941	0.0994789	0	0	0
site_16	0	0.0396913	0.869607	0.090702	0	0	0
site_17	0.191142	0.480968	0.000275365	0.326237	0	0	0.00137686
site_18	0.0209953	0.270903	0.625683	0.0824182	0	0	0
site_19	0.206177	0.581753	0.107838	0.0984108	0	0	0.00582093
site_20	0.19071	0.26479	0.289811	0.254688	0	0	0
site_21	0.343299	0.35112	0.177306	0.112307	0	0.0159675	0
site_22	0.11864	0.0661729	0.720522	0.0946648	0	0	0
site_23	0	0.0745041	0.77417	0.151326	0	0	0
site_24	0.0430206	0.792949	0.0313507	0	0.132679	0	0
site_25	0.26969	0.0305227	0.602241	0.0975457	0	0	0
site_26	0.41782	0.225414	0.11609	0.238755	0.00192171	0	0
site_27	0.00476307	0.038194	0.883592	0.0734514	0	0	0
site_28	0.844196	0.0810924	0	0.0747114	0	0	0
site_29	0	0.0158052	0.896697	0.0874975	0	0	0
site_30	0.0762012	0.58014	0.169214	0.174445	0	0	0
site_31	0.213977	0.381339	0.218675	0.0176664	0.168343	0	0
site_32	0	0.0265955	0.869373	0.104031	0	0	0
site_33	0	0.176038	0.724246	0.0997166	0	0	0
site_34	0.0868024	0.331188	0.355513	0.225951	0.000545764	0	0
site_35	0	0.0530126	0.855562	0.0914259	0	0	0
site_36	0.0926733	0.0324923	0.650729	0.157358	0	0.0667469	0
site_37	0.00883404	0.111607	0.793927	0.0856317	0	0	0
site_38	0	0.128198	0.798475	0.0733262	0	0	0
site_39	0.160304	0.0579182	0.68469	0.0970883	0	0	0
site_40	0.732074	0.163018	0	0.104908	0	0	0
site_41	0.164466	0.592307	0.092976	0.147502	0.00274883	0	0
site_42	0.0173918	0.0328036	0.842427	0.107377	0	0	0
site_43	0.0598392	0.390155	0.417185	0.132821	0	0	0
site_44	0	0.402345	0.5139	0.0837545	0	0	0
site_45	0.149733	0.649746	0.115433	0.0850882	0	0	0
site_46	0.00717081	0.0480568	0.52721	0.417563	0	0	0
site_47	0.0302801	0.424754	0.284313	0.260653	0	0	0
site_48	0.720421	0.17942	0	0.10016	0	0	0
site_49	0.787575	0.130541	0	0.081884	0	0	0
site_50	0.104614	0.763188	0.000358119	0.130286	0	0.00155484	0
site_51	0.0864233	0.387135	0.431913	0.094529	0	0	0
site_52	0	0.205456	0.642912	0.137715	0	0	0.0139173
site_53	0.00164763	0.0662974	0.791457	0.140598	0	0	0
site_54	0.294814	0.272368	0.275792	0.157026	0	0	0
site_55	0.123926	0.309757	0.262033	0.130449	0	0.173836	0
site_56	0	0.0772436	0.782719	0.140037	0	0	0
site_57	0	0.146047	0.772628	0.0813256	0	0	0
site_58	0.0630428	0.442258	0.358845	0.130249	0.00560499	0	0
site_59	0	0.0161833	0.831021	0.152796	0	0	0
site_60	0.242836	0.607842	0	0.134904	0	0.0144178	0
site_61	0.0338967	0.102124	0.782602	0.0813768	0	0	0
site_62	0.117651	0.120055	0.409971	0.161576	0.190748	0	0
site_63	0.256005	0.166546	0.00581308	0.571636	0	0	0
site_64	0.193695	0.183591	0.357994	0.263931	0.000789457	0	0
site_65	0	0.0555235	0.859239	0.0852379	0	0	0
site_66	0.240221	0.110667	0.495293	0.15382	0	0	0
site_67	0.0715875	0.0162168	0.230457	0.0946697	0	0.587069	0
site_68	0.0163511	0.0458045	0.838794	0.0990507	0	0	0
site_69	0	0.100921	0.79507	0.104009	0	0	0
site_70	0.636833	0.200018	0.0495389	0.107127	0.00596019	0.000523086	0
site_71	0	0.159443	0.559615	0.280942	0	0	0
site_72	0.00297691	0.223075	0.670478	0.103471	0	0	0
site_73	0.108065	0.220025	0.602795	0.0453677	0.0237472	0	0
site_74	0.223438	0.268982	0.359132	0.148448	0	0	0
site_75	0.0194876	0.0446371	0.827235	0.10864	0	0	0
site_76	0.396937	0.288974	0.222648	0.0914414	0	0	0
site_77	0	0.14312	0.540696	0.314063	0.00212049	0	0
site_78	0.00157451	0.0840148	0.807815	0.106596	0	0	0
site_79	0.0177038	0.161458	0.694932	0.125906	0	0	0
site_80	0.524342	0.155625	0.124332	0.195701	0	0	0
site_81	0.0942621	0.172313	0.607684	0.091525	0.032647	0	0.00156883
site_82	0.0566679	0.21185	0.4638	0.266619	0.00106285	0	0
site_83	0.801756	0.0108018	0	0.185329	0.00211371	0	0
site_84	0.512042	0.240003	0	0.247955	0	0	0
site_85	0.00105049	0.0842158	0.729766	0.18418	0.000787858	0	0
site_86	0.195585	0.282607	0.429926	0.0918823	0	0	0
site_87	0.220261	0.310179	0.31994	0.149621	0	0	0
site_88	0.0520079	0.213555	0.626456	0.0928378	0	0.0120214	0.00312251
site_89	0.000370236	0.0865154	0.793318	0.119797	0	0	0
site_90	0.790331	0.0383755	0	0.171293	0	0	0
site_91	0.327374	0.225892	0.126886	0.31708	0.00276759	0	0
site_92	0.0720165	0.184613	0.3225	0.418962	0.00190933	0	0
site_93	0.276374	0.179761	0.389651	0.152838	0.00137542	0	0
site_94	0.00025639	0.434779	0.319653	0.245311	0	0	0
site_95	0.10791	0.235803	0.536826	0.119462	0	0	0
site_96	0.0500502	0.156039	0.610482	0.183428	0	0	0
site_97	0.13056	0.170924	0.405088	0.293428	0	0	0
site_98	0.0352344	0.175461	0.631704	0.153754	0	0.0038461	0
site_99	0	0.14283	0.772973	0	0.0841973	0	0
site_100	0.340101	0.102129	0.407123	0.106884	0.0437621	0	0
site_101	0.00273358	0.419984	0.313634	0.263648	0	0	0
site_102	0.217778	0.326387	0.231173	0.174803	0.0498595	0	0
site_103	0	0.537866	0.0354598	0.419533	0	0.0071413	0
site_104	0.387504	0.297503	0.148659	0.166335	0	0	0
site_105	0.0558098	0.322937	0.472454	0.1488	0	0	0
site_106	0.0162461	0.220621	0.299335	0.315955	0.147843	0	0
site_107	0.0121225	0.165853	0.530408	0.291617	0	0	0
site_108	0.0384742	0.23462	0.537463	0.189443	0	0	0
site_109	0.0747321	0.310606	0.472813	0.141849	0	0	0
site_110	0.0738676	0.364706	0.49016	0.0712663	0	0	0
site_111	0.00575954	0.178426	0.679205	0.011041	0.125568	0	0
site_112	0.396011	0.183791	0.329816	0.0144841	0.0758974	0	0
site_113	0.0206621	0.147241	0.632873	0.17746	0.0217637	0	0
site_114	0.0554421	0.303856	0.510892	0.12981	0	0	0
site_115	0	0.0813697	0.774861	0.139055	0.00471434	0	0
site_116	0.679121	0.172693	0	0.0996368	0	0.0462719	0.00227804
site_117	0.742153	0.12434	0	0.133507	0	0	0
site_118	0.822454	0.0768221	0	0.100724	0	0	0
site_119	0.0844505	0.158016	0.597753	0.159781	0	0	0
site_120	0.882176	0.0171593	0	0.100664	0	0	0
site_121	0.409378	0.0900089	0.414614	0.0859983	0	0	0
site_122	0.57385	0.228183	0.101033	0.0969344	0	0	0
site_123	0.00806218	0.0463384	0.834104	0.111495	0	0	0
site_124	0.673338	0.176691	0	0.14997	0	0	0
site_125	0.785013	0.113337	0	0.101651	0	0	0
site_126	0.325212	0.455431	0	0.219358	0	0	0
site_127	0.789528	0.118591	0	0.091881	0	0	0
site_128	0.506284	0.31786	0	0.153824	0	0.0220327	0
site_129	0.72989	0.0414908	0	0.107777	0	0.120574	0.00026837
site_130	0.412766	0.219033	0.268659	0.0995421	0	0	0
site_131	0.144157	0.159917	0.578863	0.117063	0	0	0
site_132	0.232813	0.332416	0	0.434771	0	0	0
site_133	0.606856	0.266894	0.0192822	0.106968	0	0	0
site_134	0.617875	0.237313	0	0.144812	0	0	0
site_135	0.753618	0.0793413	0	0.16704	0	0	0
site_136	0.830128	0.0792604	0	0.0903415	0	0.000270489	0
site_137	0.00643827	0.209505	0.698645	0.085412	0	0	0
site_138	0	0.218463	0.695388	0.0861486	0	0	0
site_139	0.299858	0.296256	0.292899	0.110987	0	0	0
site_140	0.00265924	0.296872	0.491108	0.206585	0.00277682	0	0
site_141	0.831379	0.0597165	0	0.108904	0	0	0
site_142	0.172591	0.418588	0.278299	0.130521	0	0	0
site_143	0.277557	0.536843	0.0965343	0.0890652	0	0	0
site_144	0.75994	0.14128	0	0.0987802	0	0	0
site_145	0.694999	0.183766	0	0.121235	0	0	0
site_146	0.846554	0.0185037	0	0.134942	0	0	0
site_147	0.0556351	0.290144	0.499551	0.15467	0	0	0
site_148	0.0211637	0.82156	0.109433	0.0478429	0	0	0
site_149	0.105059	0.190895	0.526689	0.0122923	0.165065	0	0
site_150	0.106843	0.64095	0.0134105	0.2318	0	0.000272645	0.00672312
site_151	0.129149	0.499414	0.140778	0.226308	0	0.00353554	0.000815893
site_152	0	0.278748	0.621358	0.0998937	0	0	0
site_153	0	0.276368	0.526066	0.194827	0.00273877	0	0
site_154	0.203312	0.404475	0.251164	0.141049	0	0	0
site_155	0.0311283	0.199664	0.381797	0	0.387411	0	0
site_156	0.230626	0.207433	0.304846	0.257095	0	0	0
site_157	0	0.398704	0.486749	0.114547	0	0	0
site_158	0.0120038	0.158419	0.676107	0.15347	0	0	0
site_159	0.00409756	0.280616	0.45511	0.162739	0.0974384	0	0
site_160	0.391613	0.272717	0.217074	0.118597	0	0	0
site_161	0.455919	0.267408	0.0045846	0.192711	0.00847886	0.0708983	0
site_162	0.132344	0.179006	0.562285	0.126365	0	0	0
site_163	0.220059	0.0779064	0.580079	0.121956	0	0	0
site_164	0.0733055	0.398088	0.184036	0.344298	0.00027218	0	0
site_165	0.165049	0.723073	0.00377914	0.108099	0	0	0
site_166	0.162797	0.191393	0.510636	0.135174	0	0	0
site_167	0.39509	0.0654839	0.407024	0.13158	0	0.000822471	0
site_168	0	0.438188	0.452259	0.109552	0	0	0
site_169	0.0120478	0.284966	0.539748	0.163239	0	0	0
site_170	0.148351	0.254026	0.234143	0.358288	0.00519179	0	0
site_171	0.378825	0.232461	0.00591196	0.100678	0	0	0.282124
site_172	0.359771	0.375159	0.0460327	0.219037	0	0	0
site_173	0.103284	0.372003	0.235665	0.289049	0	0	0
site_174	0.114639	0.186958	0.389978	0.308424	0	0	0
site_175	0.00739129	0.179504	0.645325	0.16778	0	0	0
site_176	0.395196	0.462271	0.0081163	0.134416	0	0	0
site_177	0.619371	0.111535	0.142491	0.126603	0	0	0
site_178	0.494986	0.213634	0.11989	0.170946	0.000544263	0	0
site_179	0.0026558	0.574067	0.23072	0.192558	0	0	0
site_180	0.205108	0.201101	0.460641	0.130137	0	0.00301448	0
site_181	0.179533	0.443259	0.078521	0.298687	0	0	0
site_182	0.215965	0.357914	0.254601	0.0351801	0.136339	0	0
site_183	0.0769142	0.118661	0.579808	0.224617	0	0	0
site_184	0.743922	0.143368	0	0.11271	0	0	0
site_185	0.636903	0.0713375	0.159235	0.132524	0	0	0
site_186	0.0103773	0.419301	0.233175	0.333898	0.00270685	0.000541376	0
site_187	0.3273	0.144586	0.163376	0.364738	0	0	0
site_188	0.2581	0.465515	0.0946437	0.181741	0	0	0
site_189	0.778905	0.0782241	0	0.142871	0	0	0
site_190	0.0178491	0.242429	0.602827	0.124888	0.0120071	0	0
site_191	0.595948	0.131056	0.168289	0.104706	0	0	0
site_192	0.077295	0.308223	0.535822	0.0786595	0	0	0
site_193	0.0226445	0.338737	0.520685	0.117933	0	0	0
site_194	0.0508295	0.37411	0.235295	0.339766	0	0	0
site_195	0.0106998	0.522802	0.242617	0.223336	0.000544763	0	0
site_196	0.0921349	0.250487	0.40763	0.249748	0	0	0
site_197	0.406296	0.406	0.0654455	0.122259	0	0	0
site_198	0.414735	0.412956	0.000271545	0.172038	0	0	0
site_199	0.0381288	0.213354	0.559465	0.189052	0	0	0
site_200	0.175943	0.342783	0.348031	0.101354	0.0318894	0	0
site_201	0	0.107926	0.765994	0.126079	0	0	0
site_202	0.0485163	0.305213	0.481603	0.163862	0	0	0.000805727
site_203	0.218265	0.645935	0.0583097	0.0774901	0	0	0
site_204	0.353237	0.359415	0.102	0.16238	0.0229675	0	0
site_205	0.15465	0.432424	0.27101	0.141916	0	0	0
site_206	0.5016	0.244661	0.00628247	0.23453	0.0129263	0	0
site_207	0.259426	0.193283	0.361358	0.176926	0.00900752	0	0
site_208	0.337399	0.51054	0.0197434	0.132318	0	0	0
site_209	0.584978	0.109182	0.0217043	0.284135	0	0	0
site_210	0.000844877	0.729699	0.0970019	0.172455	0	0	0
site_211	0.500509	0.19554	0.0588506	0.244255	0.000845491	0	0
site_212	0.757338	0.141307	0.00609466	0.0952601	0	0	0
site_213	0.121236	0.167299	0.580365	0.128856	0.00224483	0	0
site_214	0.0425385	0.743204	0.094274	0.119984	0	0	0
site_215	0.243537	0.211327	0.442135	0.103002	0	0	0
site_216	0.29988	0.163262	0.307514	0.223255	0.00609006	0	0
site_217	0.13686	0.226714	0.519098	0.117328	0	0	0
site_218	0.493732	0.393288	0	0.11298	0	0	0
site_219	0.364748	0.23577	0.305124	0.0943579	0	0	0
site_220	0.199469	0.231509	0.286707	0.282315	0	0	0
site_221	0.0234641	0.221874	0.609258	0.120501	0	0.0249031	0
site_222	0.129076	0.541358	0.223302	0.106264	0	0	0
site_223	0.650935	0.125938	0.000281795	0.220027	0	0.00281799	0
site_224	0.344364	0.45707	0.0507183	0.122866	0.0249816	0	0
site_225	0.660031	0.207627	0	0.132342	0	0	0
site_226	0.076945	0.381536	0.413381	0.128138	0	0	0
site_227	0.808235	0.0754402	0.0160409	0.100284	0	0	0
site_228	0.0422026	0.338805	0.45801	0.160983	0	0	0
site_229	0.146119	0.14824	0.534613	0.171029	0	0	0
site_230	0.855894	0.123775	0.0203311	0	0	0	0
site_231	0.276061	0.460901	0.075982	0.187056	0	0	0
site_232	0.0710093	0.248634	0.526574	0.153782	0	0	0
site_233	0.247266	0.445695	0.21398	0.017778	0.0750113	0.000269781	0
site_234	0.231358	0.277088	0.229859	0.259286	0.0021408	0	0.00026761
site_235	0.230249	0.241963	0.000716862	0.524375	0.00269648	0	0
site_236	0.00570093	0.29639	0.458298	0.239343	0.000269049	0	0
site_237	0.3349	0.0681503	0	0.59695	0	0	0
site_238	0.0473417	0.310841	0.468257	0.170887	0.00267286	0	0
site_239	0.646688	0.151263	0	0.184811	0.000808025	0.0164305	0
site_240	0.401648	0.478004	0	0.120348	0	0	0
site_241	0.196031	0.487368	0.0496989	0.266903	0	0	0
site_242	0.747037	0.112251	0	0.140712	0	0	0
site_243	0.0408333	0.629108	0.237611	0.0923115	0.000136198	0	0
site_244	0.769278	0.0839553	0	0.146767	0	0	0
site_245	0.323493	0.17709	0.368763	0.10381	0.0268438	0	0
site_246	0.0621665	0.660102	0.0473675	0.230364	0	0	0
site_247	0.213662	0.609934	0.00242024	0.171175	0	0.00280833	0
site_248	0.271441	0.519349	0.00130988	0.2079	0	0	0
site_249	0.00211499	0.0762115	0.787096	0.134577	0	0	0
site_250	0.256985	0.556099	0.0744499	0.0275876	0.0848791	0	0
site_251	0.196729	0.116592	0.681125	0.00555403	0	0	0
site_252	0.38915	0.236228	0.0511998	0.323147	0.000274717	0	0
site_253	0.478999	0.226908	0.0450038	0.249089	0	0	0
site_254	0.727635	0.123792	0	0.148574	0	0	0
site_255	0.00179672	0.32353	0.528565	0.146108	0	0	0
site_256	0.31557	0.0334618	0.650968	0	0	0	0
site_257	0.0570338	0.526889	0.0832851	0.329809	0.00298331	0	0
site_258	0.444488	0.297203	0.00240783	0.249943	0.00595917	0	0
site_259	0.382515	0.303667	0.173568	0.140249	0	0	0
site_260	0	0.0729236	0.835472	0.0916044	0	0	0
site_261	0.296481	0.309497	0.0759288	0.100211	0.217883	0	0
site_262	1	0	0	0	0	0	0
site_263	0.0443004	0.597474	0.102034	0.236327	0.000274543	0.0195904	0
site_264	0.240461	0.564325	0.0195561	0.175658	0	0	0
site_265	0.566174	0.245345	0	0.18848	0	0	0
site_266	0.0187357	0.278583	0.269513	0.134694	0.298474	0	0
site_267	0.305352	0.12146	0.0110009	0.562187	0	0	0
site_268	0.211743	0.182177	0.395883	0.121396	0.0748244	0.0139764	0
site_269	0.171152	0.420401	0.407613	0.000833718	0	0	0
site_270	0.0603077	0.653599	0.0384636	0.24763	0	0	0
site_271	0.126941	0.135025	0.274322	0.448116	0.0155965	0	0
site_272	0.676749	0.195965	0	0.127018	0	0.00026787	0
site_273	0.193598	0.503235	0.194743	0.108423	0	0	0
site_274	0.526082	0.237901	0.064077	0.17194	0	0	0
site_275	0.538875	0.234942	0.00188612	0.224297	0	0	0
site_276	0.363382	0.212699	0.248373	0.0993388	0.0762066	0	0
site_277	0.0465258	0.478974	0.172256	0.285161	0.0170828	0	0
site_278	0.770224	0.04806	0.0260406	0.155675	0	0	0
site_279	0.37985	0.289258	0.0453007	0.283973	0.00161818	0	0
site_280	0.352885	0.281051	0.225869	0.129512	0	0.00630062	0.00438303
site_281	0.109069	0.459676	0.305347	0.125908	0	0	0
site_282	0.422	0.321527	0.0131308	0.152446	0.0604391	0.00774229	0.0227159
site_283	0.325092	0.405712	0.0735693	0.195626	0	0	0
site_284	0.62335	0.20225	0.0250175	0.149383	0	0	0
site_285	0.287612	0.459616	0.0946473	0.158124	0	0	0
site_286	0.000788873	0.349953	0.149033	0.4376	0.0578878	0.00269082	0.00204654
site_287	0.324868	0.489437	0.0361222	0.149572	0	0	0
site_288	0.499664	0.239451	0.0416317	0.218257	0.000995909	0	0
site_289	0.691792	0.04818	0	0.260028	0	0	0
site_290	0.000538934	0.44355	0.438564	0.117347	0	0	0
site_291	0.437011	0.23146	0.020168	0.311091	0	0.000270144	0
site_292	0.0104453	0.206348	0.643448	0.0927203	0.0470381	0	0
site_293	0.0454335	0.34286	0.429573	0.154391	0	0	0.0277425
site_294	0.7479	0.0872644	0	0.164835	0	0	0
site_295	0.115714	0.0349501	0.848011	0.00132419	0	0	0
site_296	0.784471	0.067536	0.00591905	0.142074	0	0	0
site_297	0.0177081	0.557651	0.320845	0.103796	0	0	0
site_298	0.408855	0.37344	0.0442408	0.173464	0	0	0
site_299	0.0104397	0.185558	0.804003	0	0	0	0
site_300	0.118046	0.163518	0.524936	0.193501	0	0	0
site_301	0.0479798	0.261047	0.519058	0.155275	0	0	0.0166405
site_302	0.180321	0.0794678	0.590286	0.149925	0	0	0
site_303	0.380284	0.45302	0.0787188	0.0879772	0	0	0
site_304	0.801316	0.11093	0	0.0877546	0	0	0
site_305	0.0396245	0.165377	0.693337	0.101661	0	0	0
site_306	0.084488	0.0788313	0.741382	0.0952992	0	0	0
site_307	0.89754	0	0	0.10246	0	0	0
site_308	0.153128	0.443816	0.236852	0.166203	0	0	0
site_309	0.488315	0.119767	0.185136	0.204835	0.00194647	0	0
site_310	0.000347365	0.0889398	0.827658	0.0830551	0	0	0
site_311	0	0.0828141	0.830631	0.0865553	0	0	0
site_312	0.0472269	0.0688569	0.542077	0.152174	0.0391293	0.150536	0
site_313	0.315972	0.528622	0.0117545	0.136655	0.00699683	0	0
site_314	0.0859799	0.734769	0.00242768	0.176823	0	0	0
site_315	0.21337	0.59584	0.00281391	0.187975	0	0	0
site_316	0.630326	0.201547	0.0117038	0.156423	0	0	0
site_317	0.611984	0.248146	0	0.13987	0	0	0
site_318	0.00315951	0.193604	0.685817	0.117419	0	0	0
site_319	0.112557	0.485074	0.0451386	0.33922	0.018011	0	0
site_320	0.000560872	0.598984	0.209314	0.0127713	0.17837	0	0
site_321	0.0926485	0.554995	0.0409663	0.311391	0	0	0
site_322	0.502928	0.326903	0.0276735	0.142495	0	0	0
site_323	0.172105	0.193882	0.488417	0.145596	0	0	0
site_324	0.014095	0.305932	0.343125	0.336848	0	0	0
site_325	0.348759	0.439318	0.0079505	0.203691	0.000281932	0	0
site_326	0	0.120902	0.723453	0.155644	0	0	0
site_327	0.198164	0.357713	0.184025	0.260098	0	0	0
site_328	0.28648	0.218021	0.350772	0.144727	0	0	0
site_329	0.255648	0.332425	0.204251	0.207676	0	0	0
site_330	0.0919817	0.211638	0.546456	0.149925	0	0	0
site_331	0	0.191451	0.663295	0.137651	0.00760366	0	0
site_332	0.15929	0.322865	0.376135	0.135236	0	0.00647392	0
site_333	0.168108	0.475236	0.183408	0.148659	0.0245886	0	0
site_334	0.77235	0.0742188	2.19598e-05	0.153409	0	0	0
site_335	0.019779	0.319223	0.523768	0.13723	0	0	0
site_336	0.0821454	0.20904	0.542193	0.166622	0	0	0
site_337	0.393142	0.391798	0.0736462	0.141413	0	0	0
site_338	0.393876	0.424304	0	0.180701	0.00111841	0	0
site_339	0.557265	0.244184	0.0403048	0.158246	0	0	0
site_340	0.0215472	0.188481	0.595532	0.185396	0.00904357	0	0
site_341	0.00992028	0.385618	0.408922	0.19554	0	0	0
site_342	0.0296293	0.553041	0.309393	0.107937	0	0	0
site_343	0	0.140281	0.752729	0.10699	0	0	0
site_344	0	0.373898	0.4533	0.172542	0.000261311	0	0
site_345	0.52572	0.259355	0.067238	0	0.133823	0	0.013864
site_346	0	0.0956603	0.692809	0.204557	0.00697342	0	0
site_347	0.0899224	0.251938	0.415295	0.242844	0	0	0
site_348	0.0105134	0.594202	0.0658063	0.329479	0	0	0
site_349	0.122362	0.199722	0.497783	0.180133	0	0	0
site_350	0.0178034	0.156335	0.597198	0.227081	0.00158206	0	0
site_351	0.278402	0.33259	0.239236	0.0102976	0.139474	0	0
site_352	0.00290227	0.120695	0.733304	0.143098	0	0	0
site_353	0.0286629	0.493622	0.367355	0	0.11036	0	0
site_354	0.370875	0.126958	0.4998	0.00236684	0	0	0
site_355	0.00158463	0.121195	0.745436	0.131785	0	0	0
site_356	0.0870663	0.41789	0.384354	0.000508422	0.110181	0	0
site_357	0.0766694	0.305359	0.460352	0.0110149	0.146604	0	0
site_358	0.0792253	0.517035	0.178818	0.220654	0.00426708	0	0
site_359	0.337654	0.188479	0.473867	0	0	0	0
site_360	0.0557497	0.221191	0.713683	0.00937584	0	0	0
site_361	0.0835225	0.693139	0.0989597	0.124379	0	0	0
site_362	0	0.280632	0.600455	0.118913	0	0	0
site_363	0.680078	0.119433	0.0437285	0.155966	0	0.000794734	0
site_364	0.331518	0.251375	0.105693	0.31036	0.00105514	0	0
site_365	0.0367085	0.372775	0.392426	0.197016	0	0	0.00107471
site_366	0.0456842	0.251106	0.594312	0.106301	0	0	0.00259674
site_367	0.0619641	0.344174	0.38211	0.211752	0	0	0
site_368	0.00130013	0.275985	0.584931	0.137015	0	0	0.000769102
site_369	0.0372525	0.47286	0.403442	0.086442	0	3.90942e-06	0
site_370	0.857753	0.0687768	0	0.0734701	0	0	0
site_371	0.0357744	0.099591	0.761534	0.1031	0	0	0
site_372	0.755802	0.133922	0.00241008	0.107866	0	0	0
site_373	0.389	0.116241	0.394862	0.0998969	0	0	0
site_374	0.297593	0.323557	0.0109277	0.367922	0	0	0
site_375	0	0.17512	0.734094	0.0907854	0	0	0
site_376	0	0.255202	0.599553	0.145245	0	0	0
site_377	0.00488631	0.229414	0.667744	0.0979557	0	0	0
site_378	0	0.130073	0.73956	0.130367	0	0	0
site_379	0.30794	0.133182	0.238189	0.293177	0.00959988	0.0179114	0
site_380	0.0114183	0.209609	0.486062	0.17652	0	0.104219	0.0121721
site_381	0.484274	0.453154	0.00791729	0.0492569	0.00312199	0	0.00227551
site_382	0	0.3093	0.472949	0.216981	0	0	0.000770099
site_383	0.39656	0.487	0.00666687	0.109774	0	0	0
site_384	0.901459	0.00841292	0	0.0901279	0	0	0
site_385	0.276952	0.542388	0.0247807	0.153929	0.0011143	0.000835707	0
site_386	0.239303	0.24964	0.117561	0.369213	0.0242824	0	0
site_387	0.237407	0.511175	0.0491765	0.200733	0.00150769	0	0
site_388	0.718345	0.181207	0	0.100447	0	0	0
site_389	0.139702	0.119984	0.531733	0.199056	0.00504517	0.00447991	0
site_390	0.64404	0.181188	0.0760774	0.0986942	0	0	0
site_391	0.469286	0.209693	0.0087954	0.312226	0	0	0
site_392	0.0554421	0.396206	0.234507	0.273275	0.0405691	0	0
site_393	0.0180118	0.20541	0.598518	0.0996567	0.0784037	0	0
site_394	0.0712895	0.151089	0.631523	0.146098	0	0	0
site_395	0.243786	0.460519	0.00168046	0.292614	0	0.000280087	0.00112036
site_396	0.0588373	0.189835	0.586027	0.164747	0.000553461	0	0
site_397	0.054577	0.541164	0.110952	0.293307	0	0	0
site_398	0.0641216	0.546399	0.204237	0.178159	0.00708313	0	0
site_399	0.208544	0.275009	0.016074	0.235329	0.264765	0.000279648	0
site_400	0.539923	0.148168	0	0.311629	0	0.000280566	0
site_401	0.651439	0.152245	0.0749462	0.12137	0	0	0
site_402	0.464011	0.148544	0.253158	0.134287	0	0	0
site_403	0.272596	0.105953	0.0025232	0.618927	0	0	0
site_404	0.85905	0.00532135	0	0.135348	0	0	0.000280002
site_405	0.116455	0.305411	0.238824	0.332585	0.00672476	0	0
site_406	0.389275	0.380292	0.0450157	0.184002	0	0.00141563	0
site_407	0.398392	0.0143947	0	0.587213	0	0	0
site_408	0.6544	0.195759	0.0133166	0.135965	0.000559618	0	0
site_409	0.0698319	0.26996	0.400761	0.236915	0.0163644	0.00616733	0
site_410	0.282416	0.303684	0.259236	0.154663	0	0	0
site_411	0.457627	0.224562	0.171655	0.146156	0	0	0
site_412	0.687317	0.188346	0.00168143	0.106486	0	0.0148361	0.00133324
site_413	0.284043	0.426489	0.0892412	0.197991	0.00223599	0	0
site_414	0.0686608	0.173876	0.48598	0.144717	0.126766	0	0
site_415	0.409942	0.138514	0.00169816	0.449846	0	0	0
site_416	0.599373	0.183992	0.0377582	0.178877	0	0	0
site_417	0.362244	0.0227407	0	0.615015	0	0	0
site_418	0.194015	0.489822	0.208821	0.107342	0	0	0
site_419	0.847265	0.0715585	0	0.0811763	0	0	0
site_420	0.144701	0.239863	0.181458	0.391385	0.0425935	0	0
site_421	0.339856	0.512043	0.00549786	0.142604	0	0	0
site_422	0.552829	0.289468	0.000280922	0.157422	0	0	0
site_423	0.215277	0.145598	0.545938	0.0931875	0	0	0
site_424	0.0133596	0.273621	0.394905	0.318115	0	0	0
site_425	0.0197794	0.336191	0.465036	0.178993	0	0	0
site_426	0.385442	0.412961	0.0351238	0.166473	0	0	0
site_427	0.229607	0.635245	0	0.127843	0	0.00337122	0.00393312
site_428	0.471107	0.0271622	0.383305	0.118426	0	0	0
site_429	0.287611	0.469804	0	0.242585	0	0	0
site_430	0.06231	0.806585	0.0298376	0.0967846	0.00448252	0	0
site_431	0.485599	0.352133	0.0019391	0.160328	0	0	0
site_432	0.769242	0.0758103	0	0.154947	0	0	0
site_433	0.0337727	0.765027	0.0246373	0.176563	0	0	0
site_434	0.78039	0.132347	0	0.0872632	0	0	0
site_435	0	0.00501004	0.85098	0.14401	0	0	0
site_436	0.146078	0.253421	0.372104	0.226565	0.00183142	0	0
site_437	0.458547	0.182952	0.00693302	0.326559	0.00639128	0.0186177	0
site_438	0.178013	0.451196	0.000553562	0.369407	0.000830348	0	0
site_439	0.275202	0.508317	0.01683	0.199651	0	0	0
site_440	0.101897	0.318181	0.19825	0.376654	0	0.0050185	0
site_441	0.687254	0.223724	0.00168121	0.0873413	0	0	0
site_442	0.00584935	0.0702696	0.729266	0.194615	0	0	0
site_443	0.942631	0.0565629	0	0.00080645	0	0	0
site_444	0	0.471274	0.369997	0.158728	0	0	0
site_445	0.12529	0.546326	0	0.328384	0	0	0
site_446	0.00356482	0.099015	0.769044	0.128377	0	0	0
site_447	0.254801	0.0652825	0.520963	0.158691	0	0.000261468	0
site_448	0.00286309	0.33785	0.529841	0.00155758	0.127888	0	0
site_449	0.890684	0.0640312	0	0.0452845	0	0	0
site_450	0.0867478	0.634292	0.158388	0.120572	0	0	0
site_451	0.355754	0.389223	0	0.255023	0	0	0
site_452	0.596402	0.24068	0.0682304	0	0.0919927	0	0.00269465
site_453	0.396985	0.285751	0.187455	0.128773	0.0010358	0	0
site_454	0.000259141	0.10303	0.731834	0	0.158139	0.00673769	0
site_455	0.295531	0.102169	0.551637	0.0506634	0	0	0
site_456	0.0457077	0.0883513	0.812843	0.0530983	0	0	0
site_457	0.0532576	0.314813	0.463186	0.168744	0	0	0
site_458	0.223918	0.196853	0.383676	0	0.195554	0	0
site_459	0.0465428	0.879067	0	0.0743906	0	0	0
site_460	0.393643	0.231635	0.261017	0.113442	0	0.000262475	0
site_461	0.0536042	0.444964	0.35924	0.142191	0	0	0
site_462	0.200629	0.132003	0.529218	0.138151	0	0	0
site_463	0.607143	0.135747	0.228329	0.028781	0	0	0
site_464	0.584448	0.0853748	0.291455	0.0387227	0	0	0
site_465	0.0510838	0.208053	0.542928	0.197935	0	0	0
site_466	0.703627	0.106294	0	0.189556	0	0.00052337	0
site_467	0.472208	0.365317	0	0.162215	0	0	0.000259843
site_468	0.281041	0.208537	0.315108	0.136716	0	0.0585985	0
site_469	0.160788	0.378403	0.179064	0.281745	0	0	0
site_470	0.0978145	0.719671	0.0779867	0.104528	0	0	0
site_471	0.580165	0.134981	0	0.179646	0	0.0680944	0.0371139
site_472	0.725927	0.231016	0.000413827	0.0426432	0	0	0
site_473	0.128443	0.6024	0.0820276	0.120941	0	0.0242155	0.041973
site_474	0	0.123626	0.76798	0.108394	0	0	0
site_475	0.783424	0.0914491	0	0.125127	0	0	0
site_476	0.145831	0.202225	0.507543	0.144401	0	0	0
site_477	0.052925	0.31908	0.504107	0.123888	0	0	0
site_478	0.0110507	0.0444959	0.761698	0.182755	0	0	0
site_479	0	0.120022	0.715	0.164977	0	0	0
site_480	0.00188969	0.0271467	0.798951	0.172013	0	0	0
site_481	0	0.868733	0	0.0813889	0	0.0417016	0.00817688
site_482	0.39962	0.304729	0.146766	0.148886	0	0	0
site_483	0.0365273	0.186055	0.690372	0.0870449	0	0	0
site_484	0	0.265288	0.593627	0.141085	0	0	0
site_485	0.693553	0.187721	0.00136329	0.117362	0	0	0
site_486	0.301485	0.403498	0.158882	0.136135	0	0	0
site_487	0.123007	0.402046	0.34406	0.130886	0	0	0
site_488	0	0.198545	0.709274	0.092181	0	0	0
site_489	0.0459013	0.814541	0.0454791	0.0940788	0	0	0
site_490	0.0290052	0.109245	0.669458	0.192292	0	0	0
site_491	0.0569356	0.286996	0.455974	0.200094	0	0	0
site_492	0	0.184924	0.632576	0.177434	0	0.00159962	0.00346585
site_493	0	0.153324	0.760619	0.086057	0	0	0
site_494	0.122192	0.171417	0.563388	0.143003	0	0	0
site_495	0.685088	0.201301	0	0.113611	0	0	0
site_496	0.0413772	0.131784	0.762423	0.0644157	0	0	0
site_497	0.583879	0.227993	0.0525913	0.129614	0.00592241	0	0
site_498	0.00350364	0.0427148	0.770358	0.179304	0.00412017	0	0
site_499	0.00109061	0.251043	0.531525	0.21007	0.00627101	0	0
site_500	0	0.257952	0.401854	0.33753	0.00266435	0	0
site_501	0	0.0772914	0.831404	0.0913049	0	0	0
site_502	0	0.172889	0.751045	0.0760664	0	0	0
site_503	0.0729524	0.243021	0.599124	0.0849025	0	0	0
site_504	0.592779	0.296526	0	0.10989	0	0	0.000805049
site_505	0	0.255823	0.655941	0.0882356	0	0	0
site_506	0.164091	0.299264	0.246482	0.288499	0	0.00139629	0.000267582
site_507	0.548797	0.195203	0.126127	0.129065	0	0.000807441	0
site_508	0.372304	0.441778	0.0269714	0.158947	0	0	0
site_509	0.147408	0.677956	0.052934	0.121702	0	0	0
site_510	0.185091	0.211743	0.578856	0.0243101	0	0	0
site_511	0.321312	0.514558	0.0367408	0.12739	0	0	0
site_512	0.000801375	0.149667	0.737859	0.0938596	0.0178131	0	0
site_513	0.0118276	0.30871	0.490974	0.188489	0	0	0
site_514	0.247092	0.275529	0.11366	0.363451	0.000268999	0	0
site_515	0	0.197719	0.710417	0.0918638	0	0	0
site_516	0	0.212807	0.617993	0.1692	0	0	0
site_517	0.00205602	0.170397	0.760279	0.0672674	0	0	0
site_518	0.676602	0.117785	0.137864	0.0677491	0	0	0
site_519	0.0034834	0.209906	0.656119	0.126297	0.00419421	0	0
site_520	0.0429136	0.186523	0.693294	0.0772702	0	0	0
site_521	0.0255251	0.596225	0.278911	0.0993392	0	0	0
site_522	0.00592858	0.206606	0.70138	0.0860846	0	0	0
site_523	0	0.195048	0.73247	0.0724817	0	0	0
site_524	0.416403	0.334094	0	0.249502	0	0	0
site_525	0	0.156869	0.77196	0.0711711	0	0	0
site_526	0.393633	0.121941	0.382339	0.101543	0.000543817	0	0
site_527	0	0.12035	0.791435	0.0882157	0	0	0
site_528	0.387074	0.344399	0.1511	0.117427	0	0	0
site_529	0.031399	0.580217	0.247176	0.141208	0	0	0
site_530	0.0348451	0.129243	0.724795	0.111117	0	0	0
site_531	0.00107182	0.177006	0.581806	0.223234	0.0168814	0	0
site_532	0	0.283849	0.618337	0.0978134	0	0	0
site_533	0	0.263922	0.6462	0.0898781	0	0	0
site_534	0.00106394	0.368275	0.544396	0.0862656	0	0	0
site_535	0.000772378	0.587631	0.0791455	0.317262	0	0.0149319	0.000257445
site_536	0.0261061	0.672993	0.12847	0.17191	0	0.000260453	0.000260442
site_537	0.253388	0.403716	0.0828605	0.252746	0	0.00729073	0
site_538	0.00770937	0.0740646	0.751926	0.166301	0	0	0
site_539	0	0.103034	0.791955	0.105011	0	0	0
site_540	0.063974	0.38202	0.389375	0.164631	0	0	0
site_541	0.71009	0.201799	0	0.0881112	0	0	0
site_542	0.39718	0.054105	0	0.0769561	0	0.0332505	0.438508
site_543	0.759955	0.0519652	0	0.187877	0	0.000203727	0
site_544	0.0729909	0.507345	0.419664	0	0	0	0
site_545	0.000882899	0.0620866	0.840814	0.0962165	0	0	0
site_546	0	0.286737	0.636154	0.0771089	0	0	0
site_547	0.191903	0.234538	0.468443	0.105116	0	0	0
site_548	0.887285	0.022852	0	0.0898635	0	0	0
site_549	0.000795068	0.293665	0.573938	0.131602	0	0	0
site_550	0.729802	0.143818	0.12638	0	0	0	0
site_551	0.00985938	0.194729	0.691099	0.104313	0	0	0
site_552	0.00396208	0.113472	0.796163	0.086403	0	0	0
site_553	0.0548927	0.470103	0.339918	0.135087	0	0	0
site_554	0.285752	0.068263	0.645985	0	0	0	0
site_555	0.818523	0.0330184	0	0.148458	0	0	0
site_556	0.151915	0.561005	0.150047	0.137034	0	0	0
site_557	0	0.0412795	0.788877	0.169843	0	0	0
site_558	0.771927	0.0487877	0	0.179285	0	0	0
site_559	0.587305	0.323771	0	0.0889207	2.59095e-06	0	0
site_560	0.0948552	0.571304	0.163349	0.170492	0	0	0
site_561	0.897945	0.0290918	0	0.0729634	0	0	0
site_562	0.00131283	0.493655	0.433608	0.0714236	0	0	0
site_563	0.804787	0.0289032	0.16631	0	0	0	0
site_564	0.203982	0.496518	0.0894579	0.210042	0	0	0
site_565	0	0.19085	0.695117	0.114033	0	0	0
site_566	0.288993	0.37777	0.201799	0.12842	0	0.00301926	0
site_567	0.24544	0.299272	0.366825	0.0884625	0	0	0
site_568	0.127774	0.43239	0.343398	0.0964385	0	0	0
site_569	0.700947	0.0594051	0.239648	0	0	0	0
site_570	0.0452571	0.735082	0.048198	0.171203	0.0002601	0	0
site_571	0.0669928	0.109162	0.727251	0.0965936	0	0	0
site_572	0	0.230163	0.706554	0.0630193	0	0	0.000263932
site_573	0.000264339	0.140493	0.748391	0.110852	0	0	0

## Sheet: simpson_levee
ID	tree_250	grass_250	crop_250	built_250	bare_250	water_250	wetland_250
site_4395	0.0963142	0.332129	0.571557	0	0	0	0
site_4396	0.0145227	0.567645	0	0	0	0.366253	0.0515792
site_4397	0.379208	0.457881	0.0832378	0.0345559	0.001671	0.0434464	0
site_4398	0.393722	0.0762779	0.00527265	0.35437	0.061383	0.108974	0
site_4399	0.987656	0.0123443	0	0	0	0	0
site_4400	0.0702324	0.467542	0.437696	0.0118194	0	0.0127104	0
site_4401	0.0792736	0.029402	0.00148785	0	0	0.796244	0.0935928
site_4402	0.386807	0.0271928	0.318037	0	0	0.131511	0.136453
site_4403	0.392847	0.593817	0.00245691	0	0	0	0.0108783
site_4404	0.0179426	0.0980151	0.884042	0	0	0	0
site_4405	0	0.188051	0.392735	0	0	0	0.419214
site_4406	0.1467	0.81947	0.0159166	0	0	0.00137802	0.0165361
site_4407	0.117773	0.352368	0.529858	0	0	0	0
site_4408	0.00279069	0.45411	0.410942	0.132157	0	0	0
site_4409	0.0425887	0.00784211	0.949569	0	0	0	0
site_4410	0.0350476	0.00112227	0.96383	0	0	0	0
site_4411	0.451984	0.39486	0.0783046	0.0748519	0	0	0
site_4412	0.429782	0.0664197	0.00192284	0.0723012	0	0.429574	0
site_4413	0.839984	0.12277	0.0121391	0	0	0.0251069	0
site_4414	0.431282	0.32593	0.218525	0	0	0	0.0242635
site_4415	0.621609	0.0586826	0.314784	0.00122623	0	0	0.0036984
site_4416	0.249206	0.554852	0	0.195942	0	0	0
site_4417	0.12101	0.328046	0.0794644	0.00356675	0	0.320417	0.147496
site_4418	0.356395	0.113077	0.000545872	0	0	0.251425	0.278557
site_4419	0.215894	0.328609	0.439948	0	0	0.0155489	0
site_4420	0.23907	0.343217	0.284763	0.132672	0.000277379	0	0
site_4421	0.00110578	0.17616	0.822734	0	0	0	0
site_4422	0.493197	0.253919	0.00029228	0	0	0.252592	0
site_4423	0.204538	0.46449	0.0804375	0.235905	0.00112426	0.0124144	0.00109124
site_4424	0.263856	0.356784	0.339323	0.00895214	0	0.0208211	0.0102638
site_4425	0.437046	0.319428	0.0947155	0.0442436	0	0.0087804	0.0957866
site_4426	0.146691	0.0973853	0.755651	0	0	0	0.000272494
site_4427	0.639944	0.0573258	0.00055096	0.286752	0	0.0140498	0.0013774
site_4428	0.914674	0.0853264	0	0	0	0	0
site_4429	0.672301	0.0443397	0.025697	0.168806	0.0883953	0.000461371	0
site_4430	0.0815906	0.561525	0.340916	0	0	0.00772578	0.00824261
site_4431	0.312894	0.0246609	0.65089	0.00719651	0	0.00435824	0
site_4432	0.0931565	0.10516	0.710619	0.0910642	0	0	0
site_4433	0.374357	0	0	0	0	0.501449	0.124194
site_4434	0.0576449	0.347083	0.474829	0.102723	0	0	0.01772
site_4435	0.82661	0.15948	0.0139101	0	0	0	0
site_4436	0.162861	0.521493	0.310997	0	0	0	0.00464929
site_4437	0.127935	0.338709	0.448953	0	0	0.0844031	0
site_4438	0.261411	0.32009	0.396719	0.0089841	0	0.00245024	0.0103457
site_4439	0.563116	0.370763	0	0	0	0.0661215	0
site_4440	0.0823378	0.0686708	0.75276	0.0940409	0.00219061	0	0
site_4441	0.212132	0.528811	0.198031	0.0588269	0.00219916	0	0
site_4442	0.76876	0.00753023	0.0701911	0	0	0.000546077	0.152972
site_4443	0.960651	0.00870671	0.0295471	0.0010948	0	0	0
site_4444	0.624615	0.120257	0.248992	0	0	0	0.00613689
site_4445	0.327156	0.41025	0.190556	0.0662442	0	0.00579402	0
site_4446	0.744075	0.237889	0	0	0	0.0180358	0
site_4447	0.727338	0.0371117	0	0	0	0.0598664	0.175684
site_4448	0.0458248	0.020872	0.931917	0.00138661	0	0	0
site_4449	0.479599	0.137442	0.128408	0	0	0.221064	0.0334858
site_4450	0.935368	0.00663724	0.00554969	0	0	0.052445	0
site_4451	0.962301	0.0374213	0	0.000277919	0	0	0
site_4452	0.322608	0.391395	0.252628	0.00626489	0	0.0257352	0.00136888
site_4453	0.392415	0.417218	0.177525	0.0128422	0	0	0
site_4454	0	0.00318027	0.996547	0	0	0	0.000272726
site_4455	0.297135	0.180809	0.0423608	0	0	0.479695	0
site_4456	0.00705357	0.167058	0.825888	0	0	0	0
site_4457	0.456754	0.0781465	0.00173165	0.0404179	0.0107858	0.412164	0
site_4458	0.0305155	0.122997	0.815681	0.0308068	0	0	0
site_4459	0.802954	0.0463902	0.0316485	0	0	0.0106485	0.108359
site_4460	0.661489	0.200981	7.154e-05	0.0138802	0	0.123508	7.02097e-05
site_4461	0.160986	0.151147	0.189059	0.00566508	0	0.356466	0.136676
site_4462	0.314113	0.240492	0.230719	0.0473323	0	0.137036	0.0303078
site_4463	0.887993	0.112007	0	0	0	0	0
site_4464	0.613464	0.0732268	0	0	0	0.31331	0
site_4465	0.165714	0.170971	0.441837	0.165158	0.0563197	0	0
site_4466	0.391542	0.149177	0.0875379	0.0313092	0.000274906	0.308269	0.0318901
site_4467	0.515874	0.0343069	0.449819	0	0	0	0
site_4468	0.530798	0.0874917	0.338977	0.0427334	0	0	0
site_4469	0.195396	0.17129	0.633314	0	0	0	0
site_4470	0.00808867	0.00286642	0	0	0	0.765307	0.223738
site_4471	0.590042	0.346487	0.000551232	0.0436264	0.0192935	0	0
site_4472	0.726289	0.273711	0	0	0	0	0
site_4473	0.207568	0.227557	0.134488	0.000545765	0	0.387316	0.0425251
site_4474	0.174539	0.00172377	0.0055704	0	0	0.538483	0.279683
site_4475	0.65898	0.207903	0	0.132292	0	0	0.000825515
site_4476	0.376599	0.0433976	0.482679	0.0161996	0	0.0624242	0.0186996
site_4477	0.159344	0.241472	0.589497	0.00968675	0	0	0
site_4478	0.531802	0.468198	0	0	0	0	0
site_4479	0.907252	0.0927481	0	0	0	0	0
site_4480	0.789006	0.192674	0.00887669	0.00944295	0	0	0
site_4481	0.82415	0.00795968	0	0	0	0.111888	0.0560021
site_4482	0.49817	0.0459784	0.00601403	0	0	0	0.449837
site_4483	0.15772	0.0753511	0.766929	0	0	0	0
site_4484	0.652646	0.033688	0.313666	0	0	0	0
site_4485	0.727931	0.272044	0	0	0	2.51568e-05	0
site_4486	0.0435367	0.0253347	0.931129	0	0	0	0
site_4487	0.618135	0.0449657	0.336899	0	0	0	0
site_4488	0.797189	0.184061	0.0187503	0	0	0	0
site_4489	0.518905	0.0254238	0.441796	0	0	0.0138757	0
site_4490	0.0103748	0.0561955	0.910731	0.0226983	0	0	0
site_4491	0.714716	0.100966	0.184319	0	0	0	0
site_4492	0.0901343	0.889264	0	0	0	0.0132012	0.00740098
site_4493	0.886898	0.00710054	0.0880326	0.0179688	0	0	0
site_4494	0.380759	0.569508	0.0497331	0	0	0	0
site_4495	0.678544	0.00248519	0.318971	0	0	0	0
site_4496	0.503054	0.41707	0.073133	0.00674265	0	0	0
site_4497	0.171201	0.311184	0.470803	0	0	0	0.0468125
site_4498	0.242512	0.171958	0.00643607	0	0	0.563236	0.0158578
site_4499	0.335537	0.117098	0.112129	0	0	0.391992	0.0432445
site_4500	0.27484	0.124806	0.384302	0	0	0.000273436	0.215779
site_4501	0.690746	0.0308464	0	0	0	0.257934	0.0204736
site_4502	0.686434	0.227752	0.0852608	0.000552981	0	0	0
site_4503	0.669757	0	0	0	0	0.311282	0.0189615
site_4504	0.156626	0.749477	0.0397112	0.0541862	0	0	0
site_4505	0.599195	0.154596	0.24621	0	0	0	0
site_4506	0.347954	0.256765	0.16213	0	0	0.189997	0.0431544
site_4507	0.527422	0.176883	0.00362569	0	0	0.288188	0.00388233
site_4508	0.355089	0.308058	0.0724147	0	0	0.104818	0.15962
site_4509	0.77253	0.222615	0.00457846	0	0	0.000276356	0
site_4510	0.261473	0.337344	0.255426	0.00915602	0	0.0613735	0.0752268
site_4511	0.01557	0.949579	0.00908355	0	0	0	0.0257677
site_4512	0.998083	0.00191748	0	0	0	0	0
site_4513	0.256604	0.522511	0.138693	0.0821915	0	0	0
site_4514	0.0127006	0.445925	0.00517736	0.356887	0.17931	0	0
site_4515	0.38651	0.459502	0.0974997	0.0564883	0	0	0
site_4516	0.398254	0.42887	0.172876	0	0	0	0
site_4517	0.587719	0.0596616	0	0.340232	0.0123876	0	0
site_4518	0.0950057	0.15945	0.377451	0.0321807	0.000276414	0.329278	0.00635781
site_4519	0.362728	0.465712	0.0149621	0.0855491	0	0.0710487	0
site_4520	0.775347	0.0125705	0.197478	0	0	0.0146052	0
site_4521	0.006456	0.167456	0.0476574	0	0	0.59988	0.178551
site_4522	0.0475691	0.629407	0.00165063	0.228166	0	0.093207	0
site_4523	0.867395	0.0404261	0	0	0	1.71103e-05	0.0921619
site_4524	0.31586	0.276228	0.00930722	0.00191619	0	0.346976	0.0497125
site_4525	0.468748	0.133423	0.376233	0	0	0.021596	0
site_4526	0.288869	0.224552	0.486579	0	0	0	0
site_4527	0.0814294	0.91747	0.00110021	0	0	0	0
site_4528	0.624223	0.330044	0.0457326	0	0	0	0
site_4529	0.00912932	0.0515788	0.939292	0	0	0	0
site_4530	0.622244	0.36175	0	0.0160059	0	0	0
site_4531	0.175447	0.00544182	0.819111	0	0	0	0
site_4532	0.00441996	0.49808	0.497224	0	0	0	0.000276249
site_4533	0.368593	0.558448	0	0.0729598	0	0	0
site_4534	0.437715	0.375769	0.152526	0.0339897	0	0	0
site_4535	0.70885	0.0218312	0	0	0	0.258594	0.0107249
site_4536	0.227885	0.563202	0.0215041	0	0	0.184142	0.00326638
site_4537	0.6008	0.0011067	0.398093	0	0	0	0
site_4538	0.492131	0.0899316	0.417937	0	0	0	0
site_4539	0.00365546	0.440036	0.556308	0	0	0	0
site_4540	0.193678	0.599982	0.139531	0.048198	0	0.0186105	0
site_4541	0.0201305	0.116569	0.825345	0.0356203	0	0.00233591	0
site_4542	0.0722335	0.03741	0.8862	0.00415687	0	0	0
site_4543	0.107017	0.119597	0.773385	0	0	0	0
site_4544	0.247631	0.375991	0.10247	0.271205	0	0.00270255	0
site_4545	0.674966	0.0948149	0.223348	0.00687108	0	0	0
site_4546	0.300666	0.063574	0.596317	0.039443	0	0	0
site_4547	0.520257	0.479743	0	0	0	0	0
site_4548	0.555099	0.143824	0.111476	0.188171	0	0	0.00142994
site_4549	0.568799	0.29856	0.0709484	0.000545937	0	0.0608739	0.000272974
site_4550	0.406373	0.06718	0.273945	0.235672	0.0168293	0	0
site_4551	0.627002	0.369978	0	0	0	0	0.00302024
site_4552	0.377152	0.389315	0.0670827	0.16645	0	0	0
site_4553	0.468311	0.324308	0.0680281	0.139353	0	0	0
site_4554	0.117543	0.000556882	0.8819	0	0	0	0
site_4555	0.134485	0.497054	0.231012	0.0125702	0	0.0306053	0.0942745
site_4556	0.0468705	0.0763135	0.875602	0.00121359	0	0	0
site_4557	0.550178	0.230236	0.127799	0.0301842	0	0.0616024	0
site_4558	0.145244	0.0652795	0.789477	0	0	0	0
site_4559	0.0368857	0.0692163	0.662491	0.0897356	0.141671	0	0
site_4560	0.706503	0.293497	0	0	0	0	0
site_4561	0.113444	0.112258	0.74559	0	0	0.0287085	0
site_4562	0.94039	0.00560799	0	0	0	0.0540024	0
site_4563	0.621842	0.0112023	0	0	0	0.279539	0.0874164
site_4564	0.576953	0.236283	0.00384503	0	0	0.013458	0.16946
site_4565	0.116694	0.209575	0.608823	0	0	0.0457651	0.019142
site_4566	0.634642	0.0702629	0.0263971	0.112521	0	0.156176	0
site_4567	0.137908	0.699383	0.0827346	0.0199122	0	0.0581512	0.00191106
site_4568	0.200617	0.085605	0.713778	0	0	0	0
site_4569	0	0.617171	0.382829	0	0	0	0
site_4570	0.264029	0.194889	0.316501	0	0	0.0735103	0.151071
site_4571	0.894751	0.0866963	0.000281364	0	0	0.0172789	0.000992876
site_4572	0.00166459	0.0758318	0.922504	0	0	0	0
site_4573	0.349762	0.309908	0.238263	0.101516	0	0.000550756	0
site_4574	1	0	0	0	0	0	0
site_4575	0.0996568	0.09425	0.800561	0.00553259	0	0	0
site_4576	0.121838	0.253843	0.114797	0.0854746	0.00669929	0.415115	0.00223318
site_4577	0.132743	0.234637	0.458333	0	0	0.174157	0.000129773
site_4578	0.392624	0.586559	0	0.00672808	0	0.0140899	0
site_4579	0.618876	0.0459405	0	0	0	0.335183	0
site_4580	0.197418	0.0835024	0.439741	0.00111288	0	0.278226	0
site_4581	0.527078	0.389131	0.0837914	0	0	0	0
site_4582	0.0405881	0.00364713	0.955765	0	0	0	0
site_4583	0.405684	0.390115	0.0642325	0.0191475	0	0.102972	0.0178485
site_4584	0.0302484	0.0889162	0.86804	0.0127958	0	0	0
site_4585	0.497091	0.170928	0.000552359	0.00579985	0	0.26644	0.0591885
site_4586	0.595667	0.000204117	0	0.261241	0.00441349	0.138475	0
site_4587	0.283591	0.450983	0.242215	0.0232104	0	0	0
site_4588	0.583012	0.000274193	0	0	0	0.40876	0.00795402
site_4589	0.557295	0	0.0125629	0	0	0.356461	0.0736817
site_4590	0.491961	0.255561	0.215906	0	0	0.0365722	0
site_4591	0.37315	0.286843	0.338914	0.00109309	0	0	0
site_4592	0.270472	0.121584	0.564986	0	0	0.0406388	0.00231955
site_4593	0.999088	0	0	0.000912183	0	0	0
site_4594	0.60918	0.0817315	0.297791	0.00578673	0	0	0.00551141
site_4595	0.361842	0.0331872	0	0	0	0.600316	0.00465486
site_4596	0.126783	0.275459	0.412077	0.029911	0	0.152598	0.0031722
site_4597	0.096669	0.783946	0	0	0	0.0889506	0.0304341
site_4598	0.971198	0.0284797	0.000273983	4.84146e-05	0	0	0
site_4599	0.0152533	0.0369106	0.947836	0	0	0	0
site_4600	0.677592	0.0477915	0.274616	0	0	0	0
site_4601	0.776616	0.223384	0	0	0	0	0
site_4602	0.0159644	0.278887	0.597908	0.103471	0	0	0.00376875
site_4603	0.786803	0.13029	0.05133	0.0315771	0	0	0
site_4604	0.00161006	0.0757006	0.922689	0	0	0	0
site_4605	0.21197	0.0600733	0.727957	0	0	0	0
site_4606	0.559041	0.0957543	0.000276895	0.342713	0.000276896	0.00193824	0
site_4607	0.143834	0.363289	0.34524	0.146545	0.00081876	0	0.000272918
site_4608	0.46813	0.202106	0	0	0	0.274349	0.0554148
site_4609	0.383979	0.114186	0.501562	0.000272753	0	0	0
site_4610	0.107357	0.239316	0.632452	0.0208752	0	0	0
site_4611	0.976068	0.0239318	0	0	0	0	0
site_4612	0.185836	0.631616	0.0266865	0.143506	0	0	0.0123557
site_4613	0.125538	0.207459	0.664793	0	0	0	0.00220947
site_4614	0.954029	0.0459709	0	0	0	0	0
site_4615	0.143745	0.396398	0.301225	0	0	0.0322178	0.126414
site_4616	0.901643	0.0945446	0.00381242	0	0	0	0
site_4617	0.197222	0.258888	0.530501	0	0	0.0133884	0
site_4618	0.160527	0.316204	0.480797	0.0104801	0	0.0201325	0.0118589
site_4619	0.885619	0.0745309	0.0395751	0	0	0	0.000274827
site_4620	0.0723941	0.0727739	0.590907	0.263649	0.000275904	0	0
site_4621	0.746317	0.0547326	0.19895	0	0	0	0
site_4622	0.785367	0	0	0	0	0.183586	0.0310463
site_4623	0.31063	0.220284	0.357089	0.0688489	0	0.0431481	0
site_4624	0.0891933	0.625359	0.183999	0.00137348	0	0.0951314	0.00494458
site_4625	0.379981	0.0460112	0.409844	0	0	0	0.164163
site_4626	0.510633	0.184656	0.295905	0.0030395	0	0.00576629	0
site_4627	0.217143	0.22365	0.514736	0.0226344	0	0.0218367	0
site_4628	0.107506	0.332458	0.554925	0.00109943	0	0.00188561	0.00212583
site_4629	0.387834	0.286891	0.292512	0.0197925	0	0.0129709	0
site_4630	0.323747	0.31801	0	0.00465775	0	0.332762	0.0208226
site_4631	0.360025	0.370848	0.0962686	0.00523825	0	0.164587	0.0030326
site_4632	0.665614	0.00488099	0.329505	0	0	0	0
site_4633	0.764346	0.229341	0	0.00521521	0	0.00109793	0
site_4634	1	0	0	0	0	0	0
site_4635	0.0199391	0.260234	0.137838	0.12391	0.458079	0	0
site_4636	0.301758	0.158132	0.513649	0.0264609	0	0	0
site_4637	0.761783	0.201522	0.000181324	0	0	0	0.0365137
site_4638	0.274692	0.0362127	0	0	0	0.388638	0.300457
site_4639	0.246152	0.0133565	0.735932	0.00455966	0	0	0
site_4640	0.6643	0.29768	0.0380207	0	0	0	0
site_4641	0.353997	0.352334	0.210988	0.0826813	0	0	0
site_4642	0.523361	0.427383	0	0.0492557	0	0	0
site_4643	0.806274	0.0680291	0.103862	0	0	0.0218343	0
site_4644	0.366123	0.121285	0.504598	0.00799449	0	0	0
site_4645	0.40279	0.0176155	0.579594	0	0	0	0
site_4646	0.176957	0.772302	0.0423001	0	0	0.00762379	0.000816797
site_4647	0.481079	0.181721	0.0362274	0	0	0.20291	0.0980628
site_4648	0.845204	0.0164887	0.138307	0	0	0	0
site_4649	0.731875	0.00735093	0.260774	0	0	0	0
site_4650	0.299478	0.655172	0	0	0.00278221	0.042568	0
site_4651	0.170587	0.544801	0.0322285	0.0176007	0	0.230899	0.00388331
site_4652	0.363903	0.0537874	0.58231	0	0	0	0
site_4653	0.377118	0.0429982	0.508329	0	0	0.0701737	0.00138132
site_4654	0.323399	0.585618	0.00136624	0	0	0	0.0896166
site_4655	0.935171	0.0302732	0.0345556	0	0	0	0
site_4656	0.54975	0.0350178	0.415232	0	0	0	0
site_4657	0.0701971	0.885121	0.0446815	0	0	0	0
site_4658	0.0561607	0.526469	0.413547	0	0	0.00109252	0.00273114
site_4659	0.0673329	0.369661	0.270815	0.0961549	0.0983014	0.0977347	0
site_4660	0.0497543	0.0965297	0.83443	0	0	0	0.0192857
site_4661	0.249513	0.127801	0.496291	0.0964795	0.00247783	0.0271602	0.000277143
site_4662	0.631058	0.00112157	0.36782	0	0	0	0
site_4663	0.338081	0.264922	0.00464952	0.39207	0.00027727	0	0
site_4664	0.160052	0.186214	0.458295	0.0649766	0	0.1078	0.0226619
site_4665	0.496539	0.497585	0.00587548	0	0	0	0
site_4666	0.716777	0.0396747	0.235816	0.00773286	0	0	0
site_4667	0.501432	0.0375039	0.454085	0.00697855	0	0	0
site_4668	0.0150001	0.187278	0.797722	0	0	0	0
site_4669	0.996181	0.00381857	0	0	0	0	0
site_4670	0.659542	0.331898	0.00801122	0	0	0.00054872	0
site_4671	0.327934	0.168101	0.330955	0.170802	0	0.000828151	0.00138025
site_4672	0.548873	0.127601	0.000277268	0	0	0.310366	0.0128834
site_4673	0.85517	0.000980796	0.143849	0	0	0	0
site_4674	0.53168	0.317728	0.00122933	0	0	0.0725751	0.076787
site_4675	0.140855	0.0470744	0.81207	0	0	0	0
site_4676	0.0870177	0.0500323	0.670607	0	0	0.192343	0
site_4677	0.838768	0.161232	0	0	0	0	0
site_4678	0.205082	0.489932	0.302042	0.00294378	0	0	0
site_4679	0.642714	0.0427287	0.0541	0.260457	0	0	0
site_4680	0.130087	0.0379973	0.829503	0.00213664	0	0.00027626	0
site_4681	0.351845	0.0449731	0	0	0	0.250692	0.352489
site_4682	0.550931	0.0908238	0.229248	0.0916381	0	0.0373593	0
site_4683	0.982216	0.0177839	0	0	0	0	0
site_4684	0.288468	0.0196259	0.691906	0	0	0	0
site_4685	0.0810024	0.16811	0.742016	0.00887129	0	0	0
site_4686	0.277504	0.559501	0.144651	0.0183438	0	0	0
site_4687	0.557143	0.15064	0.0698014	0.0734881	0	0.148373	0.000554658
site_4688	0.232814	0.315687	0.451499	0	0	0	0
site_4689	0.00491847	0.638064	0.356195	0	0	0	0.000823193
site_4690	0.227781	0.0268161	0.745403	0	0	0	0
site_4691	0.263275	0.239763	0.396795	0.100167	0	0	0
site_4692	0.00631519	0.171727	0.107877	0	0	0.505704	0.208377
site_4693	0.304532	0.350098	0.118737	0	0	0.187275	0.0393578
site_4694	0.447846	0.240731	0.153887	0.0227513	0	0.13403	0.000754342
site_4695	0.509846	0.480171	0.00998351	0	0	0	0
site_4696	0.552991	0.134756	0.312253	0	0	0	0
site_4697	0.776881	0.00301673	0.000986125	0	0	0.11959	0.0995261
site_4698	0.112904	0.170885	0.683553	0.00171977	0	0.0118782	0.0190605
site_4699	0.238755	0.315098	0.196985	0	0	0.243612	0.00554989
site_4700	0.663505	0.0635774	0.270707	0	0	0	0.00221064
site_4701	0.266709	0.196916	0.483522	0.0528537	0	0	0
site_4702	0.50522	0.1514	0	0.222732	0.00110128	0.119547	0
site_4703	0.365495	0.00440272	0.582773	0	0	0.0473295	0
site_4704	0.739648	0.0388878	0.210435	0.00937612	0	0.00165361	0
site_4705	0.16895	0.0340114	0.782061	0.014978	0	0	0
site_4706	0.129391	0.319862	0.549647	0.00109975	0	0	0
site_4707	0.323485	0.144281	0	0.000163211	0	0.283005	0.249066
site_4708	0.454592	0.376651	0.14745	0.0213066	0	0	0
site_4709	0.424294	0.187063	0.0031952	7.96589e-05	0	0.368899	0.016468
site_4710	0.230341	0.418722	0.301075	0.047662	0.00192516	0	0.000275019
site_4711	0.437407	0.360706	0.201887	0	0	0	0
site_4712	0.208041	0.408623	0.293139	0.0901973	0	0	0
site_4713	0.23638	0.514405	0.247562	0.00165216	0	0	0
site_4714	0.199734	0.157551	0.642715	0	0	0	0
site_4715	0.451969	0.0645349	0.430366	0.0531299	0	0	0
site_4716	0.365156	0.138098	0.367001	0.00574588	0	0.0896438	0.034355
site_4717	0.42228	0.369045	0.0337893	0.173227	0	0.00165803	0
site_4718	0.957318	0.0426817	0	0	0	0	0
site_4719	0.726014	0.00579684	0.268189	0	0	0	0
site_4720	0.908679	0	0.0913206	0	0	0	0
site_4721	0.399624	0.143615	0.4309	0	5.31912e-07	0.0219947	0.00386592
site_4722	0.534968	0.259491	0.183583	0.0172722	0	0.00468645	0
site_4723	0.829166	0.00575721	0.00520867	0	0	0.159869	0
site_4724	0.476875	0.489228	0.0115862	0.0223108	0	0	0
site_4725	0.519594	0.353952	0.00111073	0.122744	0.00259971	0	0
site_4726	0.905506	0.0753915	0	0.0182799	0.000822452	0	0
site_4727	0.120425	0.498147	0.0974903	0.0636139	0.000272113	0.176787	0.0432649
site_4728	0.0283083	0.313189	0.176087	0.00246719	0	0.00988642	0.470062
site_4729	0.620409	0.0073833	0	0	0	0.326756	0.0454514
site_4730	0.360781	0.49933	0.123619	0.0162702	0	0	0
site_4731	0.514444	0.363437	0.122119	0	0	0	0
site_4732	0.798631	0.139209	0.0621605	0	0	0	0
site_4733	0.106261	0.067658	0.215374	0	0	0.417362	0.193345
site_4734	0.369988	0.125568	0.418301	0.0808545	0	0.00528861	0
site_4735	0.344444	0.493445	0.103473	0.0586376	0	0	0
site_4736	0.258935	0.266751	0.474314	0	0	0	0
site_4737	0.153548	0.130472	0.710166	0.00581372	0	0	0
site_4738	0.890409	0.109591	0	0	0	0	0
site_4739	0.70276	0.0142093	0.000320042	0	0	0.163436	0.119275
site_4740	0.0527824	0.31504	0.507241	0.100588	0	0.00574533	0.0186038
site_4741	0.215301	0.459652	0.317168	0	0	0.00573358	0.00214543
site_4742	1	0	0	0	0	0	0
site_4743	0.491487	0.209722	0.0327892	0.107971	0	0.147041	0.0109892
site_4744	0.856092	0.143908	0	0	0	0	0
site_4745	0.325672	0.289937	0.275542	0.108849	0	0	0
site_4746	0.0113705	0.219415	0.352434	0.000274577	0.00466786	0.389333	0.0225044
site_4747	0.335931	0.295642	0.260052	0.0424427	0	0.0593981	0.00653432
site_4748	0.553706	0.0573318	0	0.00164226	0.38732	0	0
site_4749	0.924633	0.0753669	0	0	0	0	0
site_4750	0.157032	0.0102376	0.83273	0	0	0	0
site_4751	0.385884	0.476783	0.0991931	0.0239728	0	0.0141667	0
site_4752	0.353831	0.301129	0.00982764	0.335212	0	0	0
site_4753	0.5286	0.347947	0.123452	0	0	0	0
site_4754	0.114194	0.472151	0.39334	0.0203149	0	0	0
site_4755	0.999864	0.000136086	0	0	0	0	0
site_4756	0.173214	0.388621	0	0.438166	0	0	0
site_4757	0.904936	0.0716757	0	0	0	0	0.0233881
site_4758	0.676495	0.0630434	0.00438571	0	0	0.18974	0.0663355
site_4759	0.287877	0.123387	0.0846419	0	0	0.17678	0.327315
site_4760	0.0905808	0.747461	0.155082	0.00687537	0	0	0
site_4761	0.347909	0.0428984	0.609193	0	0	0	0
site_4762	0.306195	0.112778	0.495678	0.0152508	0	0.0553124	0.0147864
site_4763	0.0213249	0.603386	0.301715	0.000272779	0	0.0207317	0.0525699
site_4764	0.493052	0.280341	0	0	0	0.222767	0.00383932
site_4765	0.0258615	0.473486	0.483414	0	0	0.0157892	0.00144957
site_4766	0.661907	0.121657	0.178223	0.0107515	0.0185663	0.00889522	0
site_4767	0.217809	0.141759	0.551312	0.0359007	0	0.0532193	0
site_4768	0.966109	0.00755127	0	0	0	0	0.0263395
site_4769	0.383402	0.0125591	0	0	0	0.334728	0.269311
site_4770	0.0214367	0.0799573	0.830322	0.0682837	0	0	0
site_4771	0.332783	0.000549487	0.646887	0.0197804	0	0	0
site_4772	0.106918	0.373876	0.514432	0.00477373	0	0	0
site_4773	0.546438	0.333033	0.120529	0	0	0	0
site_4774	0.790059	0.0697002	0.0769256	0	0	0.0427949	0.0205206
site_4775	0.239183	0.760255	0.000275518	0.000286424	0	0	0
site_4776	0.777401	0.0600735	0.162251	0	0	0	0.000274913
site_4777	0.547052	0.0138664	0.306235	0	0	0.0164346	0.116413
site_4778	0.27329	0.473782	0.0024513	0.250476	0	0	0
site_4779	0.255873	0.383849	0.355041	0.00523713	0	0	0
site_4780	0.364489	0.452995	0.182516	0	0	0	0
site_4781	0.0368009	0.0986476	0.740473	0.113735	0	0.000816566	0.00952663
site_4782	0.283561	0.127678	0.512578	0.026998	0.0043965	0.0445133	0.000274771
site_4783	0.193777	0.173551	0	0.573529	0.0591428	0	0
site_4784	0.485951	0.239238	0.0510561	0.222656	0	0	0.00109897
site_4785	0.617094	0.147348	0.0943441	0.0322758	0	0.00495464	0.103984
site_4786	0.508739	0.341109	0	0	0	0.113436	0.0367158
site_4787	0.0930132	0.0889348	0.818052	0	0	0	0
site_4788	0.554655	0.235116	0.210228	0	0	0	0
site_4789	0.0565409	0.939365	0	0	0	0	0.00409453
site_4790	0.356496	0.110465	0.502134	0.0309044	0	0	0
site_4791	0.119534	0.710207	0.166937	0.00332153	0	0	0
site_4792	0.369946	0.217445	9.64256e-05	0.412512	0	0	0
site_4793	0.141246	0.355462	0.365132	0.0901883	0	0.0471493	0.000822366
site_4794	0.400935	0.445164	0	0	0	0	0.153901
site_4795	0.277357	0.556979	0.130215	0.00603526	0	0.029414	0
site_4796	0.120999	0.303483	0.549645	0.0155148	0	0.00898154	0.00137628
site_4797	0.999962	3.84832e-05	0	0	0	0	0
site_4798	0.742041	0.0182942	0.239665	0	0	0	0
site_4799	0.217153	0.16295	0.619341	0	0	0	0.000555452
site_4800	0.706548	0.0944789	0.11702	0.0819527	0	0	0
site_4801	0.735725	0.22985	0.0181276	0.0162979	0	0	0
site_4802	0.534847	0.0631577	0.271648	0	0	0.119582	0.0107656
site_4803	0.968803	0.0311973	0	0	0	0	0
site_4804	0.491881	0.46327	0.00984019	0.0350087	0	0	0
site_4805	0.152997	0.090814	0.634896	0.121293	0	0	0
site_4806	0.133676	0.0585215	0.807803	0	0	0	0
site_4807	0.934482	0.00110541	0.0644125	0	0	0	0
site_4808	0.693579	0.189518	0.0439375	0.0729649	0	0	0
site_4809	0.70269	0.0227942	0.274516	0	0	0	0
site_4810	0.521475	0.277673	0.186915	0.0139368	0	0	0
site_4811	0.398627	0.208728	0.382728	0	0	0.00991768	0
site_4812	0.252854	0.0129968	0.734149	0	0	0	0
site_4813	0.0233672	0.927089	0.0210217	0	0	0	0.0285219
site_4814	0.12223	0.00382589	0.873944	0	0	0	0
site_4815	0.362064	3.18966e-05	0.637904	0	0	0	0
site_4816	0.246783	0.180284	0.572934	0	0	0	0
site_4817	0.447899	0.0793563	0.377817	0.0333016	0.00220567	0.0594203	0
site_4818	0.519133	0.295436	0.0254773	0.153584	0	0.00636932	0
site_4819	0.511405	0.21523	0.268379	0.00374483	0	0.0012406	0
site_4820	0.0932999	0.255416	0.285375	0.0317328	0.00576962	0.321588	0.00681903
site_4821	0.336162	0.233475	0.223902	0.00809775	0	0.195251	0.00311192
site_4822	0.0765024	0.00993953	0.904857	0.00870123	0	0	0
site_4823	0.726231	0.0913462	0.00530769	0.0256171	0	0.104943	0.0465549
site_4824	0.310106	0.195325	0.0251004	0.0341624	0	0.121485	0.313822
site_4825	0.025606	0.113685	0.835481	0.0252276	0	0	0
site_4826	0.00244808	0.0226699	0.974882	0	0	0	0
site_4827	0.302397	0.0107349	0.545524	0	0	0.141344	0
site_4828	0.10796	0.0480208	0.844019	0	0	0	0
site_4829	0.0225119	0.177647	0.462225	0.186624	0.150992	0	0
site_4830	0	0	1	0	0	0	0
site_4831	0.141816	0.852636	0.00504853	0	0	0.000499576	0
site_4832	0.366052	0.61191	0	0	0	0	0.0220378
site_4833	0.288492	0.0889666	0.245477	0	0	0.233356	0.143708
site_4834	0.274423	0.0350357	0.601155	0.0893868	0	0	0
site_4835	0.232254	0.443456	0.304811	0.00289803	0	0.0126459	0.00393419
site_4836	0.301155	0.0927868	0.602099	0	0	0.00395861	0
site_4837	0.495846	0.136903	0.102787	0.00152529	0	0.0816532	0.181286
site_4838	0.995063	0.00493658	0	0	0	0	0
site_4839	0.325669	0.0710672	0	0.0119149	0	0.503753	0.0875963
site_4840	0.165527	0.328908	0.491902	0	0	0.0133998	0.000262917
site_4841	0.425093	0.214029	0.360879	0	0	0	0
site_4842	0.159929	0.384261	0.0133083	0.0348988	0	0.389606	0.0179969
site_4843	0.124309	0.147452	0.728239	0	0	0	0
site_4844	0.251723	0.332198	0.365593	0.0169956	0	0.0230206	0.0104698
site_4845	0.916158	0.033044	0	0	0	0.039521	0.0112766
site_4846	0.116672	0.344735	0.461942	0.0109257	0	0.0614479	0.00427751
site_4847	0.382747	0.31448	0.145852	0.150366	0.00655552	0	0
site_4848	0.04946	0.414473	0.436344	0	0	0.0882151	0.0115084
site_4849	0.432935	0.316264	0	0.051508	0	0.199293	0
site_4850	0.0167922	0.462521	0.0507267	0.00368623	0	0.185831	0.280442
site_4851	0.271308	0.158055	0.451299	0.119338	0	0	0
site_4852	0.0227718	0.2385	0.719881	0.0188477	0	0	0
site_4853	0.0315551	0.397625	0.490587	0.0486862	0.0315473	0	0
site_4854	0.0689878	0.502461	0.315207	0.00182917	0	0.0714859	0.0400286
site_4855	0.232016	0.0154535	0.75253	0	0	0	0
site_4856	0.475316	0.375399	0.113984	0.0136373	0	0.0200974	0.00156601
site_4857	0.0467793	0.0923527	0.858763	0.00210542	0	0	0
site_4858	0.265865	0.412188	0.266885	0.0550625	0	0	0
site_4859	0.266523	0.215974	0.0404563	0.465452	0.0115942	0	0
site_4860	0.333375	0.625733	0.000263846	0.00268247	0	0.000129944	0.0378156
site_4861	0.336857	0.505668	0.142331	0.00820245	0	0.00694069	0
site_4862	0.993829	0.00617137	0	0	0	0	0
site_4863	0.342115	0.28402	0.0021088	0.356186	0.01557	0	0
site_4864	0.397409	0.344155	0.258436	0	0	0	0
site_4865	0.0937704	0.895202	0.000527281	0	0	0.0105006	0
site_4866	0.0116407	0.0279695	0.945045	0.0153447	0	0	0
site_4867	0.0776404	0.160066	0.012152	0.749349	0.000792499	0	0
site_4868	0.0821003	0.635272	0.0890261	0.166209	0.0273925	0	0
site_4869	0.399204	0.195278	0.000266303	0	0	0.39497	0.0102816
site_4870	0.151789	0.0446599	0.110899	0.279667	0	0.401815	0.0111694
site_4871	0.429547	0.00289578	0	0.048158	0.00210598	0.517293	0
site_4872	0.377887	0.32654	0.00529898	0.0322269	0	0.258047	0
site_4873	0.639772	0	0.0164712	0	0	0.324137	0.0196204
site_4874	0.873915	0.00278689	0	0	0	0.101658	0.0216398
site_4875	0.107795	0.0408055	0.751023	0.100377	0	0	0
site_4876	0.3761	0.607757	0	0.0161427	0	0	0
site_4877	0.021474	0.468625	0.509901	0	0	0	0
site_4878	0.403776	0.0930262	0.00381706	0.443295	0.000150654	0.0559349	0
site_4879	0.0979344	0.864555	0.0208384	0.0153533	0	0	0.00131904
site_4880	0.417794	0.115336	0.46687	0	0	0	0
site_4881	0.272132	0.621911	0.105958	0	0	0	0
site_4882	0.143865	0.43279	0.393508	0.00237576	0	0.0274608	0
site_4883	0.193448	0.0903601	0.714596	0.00159498	0	0	0
site_4884	0.924478	0.0734141	0	0.00210788	0	0	0
site_4885	0.040959	0.0670472	0.851638	0.0403554	0	0	0
site_4886	0.0102354	0	0.989765	0	0	0	0
site_4887	0.150475	0.0604582	0.737822	0.0488306	0.00241457	0	0
site_4888	0.623268	0.204376	0	0	0	0.110102	0.0622543
site_4889	0.18885	0.089911	0	0.720713	0.000526604	0	0
site_4890	0.595185	0.3447	0	0.0116618	0	0.0484541	0
site_4891	0.0349631	0.923657	0.0413798	0	0	0	0
site_4892	0.463015	0.423515	0.0622838	0.000520257	0	0.0363583	0.0143073
site_4893	0.269014	0.491514	0	0.205283	0	0.0341885	0
site_4894	0.0632319	0.187067	0.696268	0.0534332	0	0	0
site_4895	1	0	0	0	0	0	0
site_4896	0.454171	0.164712	0.251955	0.0186501	0	0.107349	0.00316259
site_4897	0.317507	0.319709	0.174084	0.0663929	0	0.0574199	0.0648863
site_4898	0.0941386	0.270906	0.60187	0.0330856	0	0	0
site_4899	0.191846	0.312693	0.272087	0.193411	0.00931213	0	0.0206517
site_4900	0.598929	0.031474	0.000170755	0.16519	0	0.201035	0.00320051
site_4901	0	0.0353932	0.91619	0	0	0.0233933	0.0250233
site_4902	0.709213	0.0508077	0.170038	0.00159114	0	0.06835	0
site_4903	0.045724	0.291707	0.25417	0	0	0.0719197	0.336479
site_4904	0.112275	0.036378	0.644368	0.206979	0	0	0
site_4905	0.304388	0.36185	0.309986	0.00317022	0	0.0206056	0
site_4906	0.0847085	0.450075	0.432758	0.0321341	0.000262948	0	6.12748e-05
site_4907	0.743858	0.244934	0	0.011208	0	0	0
site_4908	0.352573	0.445258	0.190363	0	0	0.00759602	0.00420997
site_4909	0.000265479	0.0455335	0.949688	0.00451301	0	0	0
site_4910	0.567097	0.338536	0.0314511	0	0	0.0608009	0.00211487
site_4911	0.0454629	0.0212859	0.933251	0	0	0	0
site_4912	0.0289355	0.042767	0.928298	0	0	0	0
site_4913	0.280552	0.217047	0.127175	0	0	0.228685	0.146541
site_4914	0.671099	0.269549	0.00177672	0.000528197	0	0.00686667	0.0501801
site_4915	0.191338	0.301957	0.369261	0.0313827	0	0.0749256	0.0311356
site_4916	0.256032	0.739459	0	0	0	0	0.0045088
site_4917	0.121845	0.370808	0.0119829	0.0130532	0.000143139	0.480852	0.00131605
site_4918	0.0318552	0.551442	0.198113	0	0	0	0.218589
site_4919	0.166716	0.485719	0.330788	0.00261383	0	0.00376402	0.0103992
site_4920	0.800946	0.0291338	0.16992	0	0	0	0
site_4921	0.955585	0	0	0.044415	0	0	0
site_4922	0.997712	0.00228777	0	0	0	0	0
site_4923	0.0149196	0.277034	0.386176	0.00109403	0	0.318315	0.00246145
site_4924	0.864701	0.123236	0.0115176	0.000546094	0	0	0
site_4925	0.482736	0.112883	0.00510244	0.0240029	0	0.277228	0.0980485
site_4926	0.668454	0.00699158	0.00379834	0.00193606	0	0.215955	0.102865
site_4927	0.452179	0.087733	0.000545506	0	0	0.377037	0.0825046
site_4928	0.194029	0.325753	0.451851	0	0	0	0.0283668
site_4929	0	0.368505	0.310746	0	0	0.000278731	0.32047
site_4930	0.42049	0.249222	0.0243334	0.0931896	0	0.144623	0.0681417
site_4931	0.371301	0.628693	0	0	0	5.87262e-06	0
site_4932	0.582557	0.0831144	0.00572573	0	0	0.211225	0.117378
site_4933	0.114856	0.460043	0.0027166	0.028834	0	0.0384727	0.355078
site_4934	1	0	0	0	0	0	0
site_4935	0.128995	0.0867361	0.784269	0	0	0	0
site_4936	0.111156	0.22703	0	0	0	0.203315	0.458499
site_4937	0.00185044	0.00569883	0	0	0	0.869343	0.123108
site_4938	0.0292239	0.573531	0.0199195	0.0529261	0.000276656	0.309737	0.0143857
site_4939	0.693135	0.0260766	0	0	0	0.170261	0.110528
site_4940	0.346398	0.367222	0.145242	0	0	0.141137	0
site_4941	0.139252	0.214522	0.024911	0.00429611	0	0.459945	0.157073
site_4942	0.411806	0.0789819	0.101982	0.0953627	0	0.0341656	0.277702
site_4943	0.601907	0.0813105	0	0	0	0.283939	0.0328437
site_4944	0.326683	0.311425	0.256521	0	0	0.0226495	0.082721
site_4945	0.667505	6.16463e-05	0	0	0	0.332433	0
site_4946	0.242412	0.398193	0.353115	0	0	0	0.00628103
site_4947	0.381591	0.383491	0.0322544	0.201838	0.000826653	0	0
site_4948	0.544296	0.0188152	0.0235792	0	0	0.0871642	0.326146
site_4949	0	1	0	0	0	0	0
site_4950	0.342624	0.351917	0.120145	0.00451933	0	0.107763	0.0730318
site_4951	0.682465	0.130806	0.061884	0.0802153	0	0.04463	0
site_4952	0.32093	0.362519	0.316551	0	0	0	0
site_4953	0.248805	0.685787	0.0610485	0	0	0	0.00435914
site_4954	0.597701	0.0494683	0	0	0	0.00109104	0.35174
site_4955	0.0816633	0.76247	0.141657	0	0.000819843	0	0.0133905
site_4956	0.0446052	0.399671	0.554213	0.00151095	0	0	0
site_4957	0.449509	0.0437716	0.321073	0	0	0.0399006	0.145746
site_4958	0.460291	0.0278037	0	0.0485952	0.00191021	0.459763	0.00163726
site_4959	0.0936338	0.0551837	0.838279	0.0124711	0.000432686	0	0
site_4960	0.0925024	0.0878163	0.351076	0	0	0.235329	0.233276
site_4961	0.84539	0.15461	0	0	0	0	0
site_4962	1	0	0	0	0	0	0
site_4963	0.236451	0.12138	0.278414	0.000544831	0	0.161902	0.201308
site_4964	0.0282404	0.156966	0.814794	0	0	0	0
site_4965	0.131989	0.748945	0.112177	0	0	0	0.00688918
site_4966	0.493159	0.141407	0.365434	0	0	0	0
site_4967	0.362826	0.281113	0.204227	0.0495767	0	0.0957275	0.00652946
site_4968	0.0335184	0.481308	0.0703727	0.00154111	0	0.0338718	0.379388
site_4969	0.341829	0.249432	0.40709	0.00164894	0	0	0
site_4970	0.701804	0.138447	0.0305984	0.129151	0	0	0
site_4971	0.379061	0.595754	0	0	0	0	0.0251851
site_4972	0.287035	0.104569	0.284068	0	0	0.139651	0.184677
site_4973	0.00531863	0.666804	0.0850537	0	0	0	0.242824
site_4974	0.371075	0.211233	0.00362769	0.196223	0	0.217841	0
site_4975	0.0231074	0.587493	0.356991	0.00660196	0	0	0.0258067
site_4976	0.994201	0.00579944	0	0	0	0	0
site_4977	0.161166	0.658212	0.141626	0.0200472	0	0.0183997	0.000549247
site_4978	0.689702	0.189229	0.00111726	0	0	0.085905	0.0340461
site_4979	0.169562	0.0773612	0.602579	0.150498	0	0	0
site_4980	0.038218	0	0	0	0	0.780681	0.181101
site_4981	0	0.945063	0.054937	0	0	0	0
site_4982	0.637518	0.232786	0.086431	0.0432647	0	0	0
site_4983	0	0.379408	0.44904	0	0	0.0861888	0.0853631
site_4984	0.00419069	0.490801	0.212404	0	0	0.0117669	0.280837
site_4985	0.638609	0	0	0	0	0.227443	0.133948
site_4986	0.62434	0.147068	0.0761483	0.00604027	0	0.142799	0.00360465
site_4987	0.441117	0.558061	0.000821862	0	0	0	0
site_4988	0.223927	0.677296	0.087163	0.0116149	0	0	0
site_4989	0.413025	0.586975	0	0	0	0	0
site_4990	0.287059	0.0418286	0.671113	0	0	0	0
site_4991	0.496202	0.011633	0.00221327	5.02538e-05	0	0.446249	0.0436531
site_4992	0.0548148	0.613533	0.0623885	0	0	0.202741	0.0665222
site_4993	0.390403	0.167274	0.00174447	0.000276387	0	0.3964	0.0439014
site_4994	0.584077	0.315145	0.0451232	0.00596055	0.0496936	0	0
site_4995	0.123192	0.355321	0.175961	0.0127135	0	0.266664	0.066148
site_4996	0.0073218	0.522524	0.462561	0.00759315	0	0	0
site_4997	0.400592	0.264055	0.204227	0.0199455	0	0.0840549	0.0271265
site_4998	0.707873	0.151386	0	0	0	0.0495937	0.0911468
site_4999	0.456686	0.209775	0.018596	0.314943	0	0	0
site_5000	0.579521	0.420479	0	0	0	0	0
site_5001	0.438597	0.331543	0.064033	0.165555	0.000272463	0	0
site_5002	0.215241	0.108088	0.419943	0	0.00749887	0.249228	0
site_5003	0.137927	0.726507	0.130335	0	0	0.00441099	0.000820535
site_5004	0.228044	0.417779	0.344041	0.0101355	0	0	0
site_5005	0.258078	0.0915916	0.0816883	0.0619565	0	0.452587	0.0540991
site_5006	0.515933	0.134404	0	0	0	0.317213	0.0324502
site_5007	0.617609	0.200545	0	0	0	0.076574	0.105272
site_5008	0.0302983	0.409008	0.227481	0.0580187	0.000275664	0.198614	0.0763041
site_5009	0.540671	0.168137	0.0109458	0	0	0.204505	0.0757406
site_5010	0.619209	0.160376	0.00649057	0	0	0.0456741	0.168251
site_5011	0.297359	0.441378	0.209986	0.0512773	0	0	0
site_5012	1	0	0	0	0	0	0
site_5013	0.466317	0.160991	0.242015	0.00574554	0	0.112242	0.0126893
site_5014	0.00822112	0.911098	0.0383967	0	0	0	0.0422843
site_5015	0.0901378	0.826662	0.0771575	0.00312284	0	0	0.00291945
site_5016	0.151871	0.776169	0.0719607	0	0	0	0
site_5017	0.379788	0.0840567	0.534796	0	0	0	0.00135979
site_5018	0.945313	0.0546869	0	0	0	0	0
site_5019	0.590814	0.34279	0	0.00109743	0	0	0.0652989
site_5020	0.0468605	0.344053	0.305692	0.00436707	0	0.258964	0.040063
site_5021	0.974912	0.0250885	0	0	0	0	0
site_5022	0.230758	0.696779	0.0492608	0	0	0	0.023202
site_5023	0.957989	0.0420106	0	0	0	0	0
site_5024	0.743608	0.05624	0	0	0	0.19112	0.00903231
site_5025	0.162576	0.737812	0.0818067	0.0128248	0.00110691	0	0.00387432
site_5026	0	0.984821	0.00165587	0	0	0	0.0135232
site_5027	0.207529	0.326149	0.0756645	0.0085779	0	0.203796	0.178283
site_5028	0.261948	0.0172163	0.450424	0.270413	0	0	0
site_5029	0.100855	0.648054	0.043684	0.0061069	0	0.0119883	0.189311
site_5030	0.244256	0.218526	0.074848	0	0	0.18513	0.277239
site_5031	0.0558551	0.089542	0.784053	0.0705496	0	0	0
site_5032	0	0.553217	0.00137481	0	0.000274962	0.437695	0.00743819
site_5033	0.307613	0.48805	0.017016	0.060838	0	0.12565	0.000832788
site_5034	0.431038	0.425972	0.0781843	0.0405793	0	0	0.0242269
site_5035	0.034197	0.860893	0.00108179	0.00122104	0	0.0520284	0.0505791
site_5036	0.0489927	0.520632	0.209841	0	0	0.0257847	0.19475
site_5037	0.639454	0.10445	0	0.0726542	0	0.177381	0.00606036
site_5038	0.0973933	0.352349	0.228586	0	0	0.0145587	0.307113
site_5039	0.965522	0.0199275	0.0145503	0	0	0	0
site_5040	0.0426673	0.106231	0.850559	0.00054352	0	0	0
site_5041	0.536817	0.303828	0.0314751	0	0	0.114377	0.0135027
site_5042	0.0694664	0.664007	0.261181	0.00519077	0	0.000155659	0
site_5043	0.0878024	0.642865	0.131349	0	0	0.028166	0.109817
site_5044	0.253696	0.0881747	0.275321	0	0	0.209112	0.173697
site_5045	0.00112049	0.202702	0.588286	0	0	0.00140064	0.206491
site_5046	0.445183	0.0589826	0.162572	0.0162166	0	0.220221	0.0968247
site_5047	0.502943	0.351128	0.107864	0	0	0.0223426	0.0157227
site_5048	0.294658	0.672521	0.00327503	0.0295462	0	0	0
site_5049	0.0454981	0.567291	0.188353	0	0	0.0701397	0.128718
site_5050	0.199694	0.165737	0.183025	0.129711	0	0.182769	0.139064
site_5051	0.321167	0.334803	0.245947	0.0377369	0	0.0603465	0
site_5052	0.332436	0.0371388	0	0	0	0.21501	0.415416
site_5053	0.372905	0.309086	0.000280656	0	0	0.189405	0.128323
site_5054	0.994898	0.00399202	0.00111022	0	0	0	0
site_5055	0.778044	0.0164332	0	0	0	0.13025	0.0752731
site_5056	0.549719	0	0	0	0	0.318077	0.132204
site_5057	0	0.215698	0.469599	0.0124037	0	0.292842	0.00945685
site_5058	0.204229	0.67626	0.0673532	0	0	0	0.0521582
site_5059	0.0877147	0.141756	0.0342931	0.00354628	0	0.494486	0.238204
site_5060	0.178858	0.124978	0.643942	0.0522223	0	0	0
site_5061	0.0300871	0.49641	0.00328725	0	0	0.375866	0.0943495
site_5062	0.297093	0.372327	0.00620669	0.0953598	0	0.16823	0.0607827
site_5063	0.213374	0.52309	0	0	0	0	0.263535
site_5064	0.048766	0.0567875	0.000271233	0	0	0.13482	0.759355
site_5065	0.808588	0.0607631	0.0552535	0	0	0.000139577	0.0752556
site_5066	0.0483305	0.507319	0.0822877	0.204981	0.0807811	0.076301	0
site_5067	0.372483	0.193661	0.236133	0.146784	0	0.0500439	0.000895542
site_5068	0.0726833	0.0611581	0.723906	0.0295437	0	0.103847	0.00886154
site_5069	0.396934	0.508179	0	0.00245397	0	0.0564417	0.0359919
site_5070	0.281267	0.402294	0.0569349	0.00831892	0	0.150234	0.100951
site_5071	0.388889	0.308301	0.00412501	0.0170504	0	0.281635	0
site_5072	0.715724	0.207131	0.0714368	0.00570822	0	0	0
site_5073	0.211682	0.163576	0.573786	0.0509561	0	0	0
site_5074	0.619951	0.00501441	0.00744402	0	0	0.321484	0.0461067
site_5075	0.154806	0.698949	0.11054	0.0357043	0	0	0
site_5076	0.589819	0.0555195	0	0	0	0.354661	0
site_5077	0.817321	0.000280443	0.182399	0	0	0	0
site_5078	0.124069	0.39558	0.480351	0	0	0	0
site_5079	0	0.978499	0.0215009	0	0	0	0
site_5080	0.965306	0.0346939	0	0	0	0	0
site_5081	0.373831	0.611499	0.000920857	0	0	0.00997545	0.00377452
site_5082	0.848437	0.0678106	0.0837528	0	0	0	0
site_5083	0.0571862	0.38652	0.539966	0.0163271	0	0	0
site_5084	0.5895	0.107242	0	0.00939405	0	0.225098	0.0687659
site_5085	0.264636	0.20358	0.530973	0.0008099	0	0	0
site_5086	0.392043	0.185384	0.347792	0	0	0.0747811	0
site_5087	0.364816	0.245736	0.379996	0.00191185	0	0.007266	0.000273109
site_5088	0.969191	0.0108621	0	0.0199467	0	0	0
site_5089	0.901163	0.087239	0.0115981	0	0	0	0
site_5090	0.262738	0.4671	0.145429	0	0	0.12446	0.000272986
site_5091	0.426748	0.0967084	0.170888	0.0777962	0	0.22232	0.00553849
site_5092	0.344258	0.565899	0.0742563	0.0155864	0	0	0
site_5093	0.981376	0.0186243	0	0	0	0	0
site_5094	0.1323	0.740364	0.0120553	0	0	0	0.11528
site_5095	0.728391	0.1181	0.139947	0.0135622	0	0	0
site_5096	0.0967959	0.0204816	0.083417	0	0	0.420695	0.378611
site_5097	0.330632	0.273644	0.213562	0.0027223	0	0.136612	0.0428269
site_5098	0.0773916	0.279003	0.250787	0.00218069	0	0.232601	0.158038
site_5099	0.434955	0.299899	0.0148714	0.0339013	0	0.110271	0.106102
site_5100	0.170192	0.296031	0.0153551	0.0397188	0	0.478544	0.000159731
site_5101	0.343364	0.330952	0.1182	0.0471436	0.0509202	0.108866	0.000554007
site_5102	0.553855	0.13748	0.0172476	0	0	0.262423	0.0289949
site_5103	0.0937352	0.588365	0.265062	0.0193327	0	0.0264309	0.00707327
site_5104	0	0.142772	0.0809376	0.00465708	0	0.605827	0.165806
site_5105	0.957177	0.0428229	0	0	0	0	0
site_5106	0.179393	0.299417	0.51542	0.00576938	0	0	0
site_5107	0.53241	0.183888	0.0945904	0.0310547	0	0.15778	0.000276321
site_5108	0.145136	0.175072	0	0	0	0.111521	0.56827
site_5109	0.0596966	0.468312	0.0271869	0.119795	0	0.302266	0.022743
site_5110	0.410876	0.394338	0.147663	0.00378345	0	0.0134032	0.0299358
site_5111	0.200239	0.386441	0.0956474	0.310392	0.00727984	0	0
site_5112	0.258971	0.125737	0.254443	6.31266e-05	0	0.336984	0.0238014
site_5113	0.246164	0.169535	0.367176	0.0364383	0	0.180299	0.000387164
site_5114	0.949596	0.0504036	0	0	0	0	0
site_5115	0.0625866	0.36095	0.474052	0.102412	0	0	0
site_5116	0.00110188	0.247604	0.44476	0	0.000275481	0.272656	0.0336027
site_5117	0.106511	0.602779	0.00336774	0	0	0.0542194	0.233123
site_5118	0.619891	0.0879611	0.0869096	0.205238	0	0	0
site_5119	0.508885	0.00993996	0.481175	0	0	0	0
site_5120	0.540928	0.195541	0.193689	0.0253925	0	0.0444501	0
site_5121	0.911377	0.0886226	0	0	0	0	0
site_5122	0.433937	0.233506	0.231988	0.014149	0	0.0395107	0.0469083
site_5123	0.162409	0.36393	0.00165099	0	0	0.344194	0.127815
site_5124	0.824676	0.161256	0	0	0	0	0.0140686
site_5125	0.639502	0.292275	0.0639127	0.00431021	0	0	0
site_5126	0.0390248	0.577086	0.375768	0.00812083	0	0	0
site_5127	0.620716	0.170143	0	0	0	0.201823	0.00731878
site_5128	0.429981	0.361563	0.108192	0.0276428	0.000214585	0.0334447	0.0389623
site_5129	0.70823	0.0936199	0	0	0	0.19815	0
site_5130	0.541544	0.449386	0	0	0	0	0.00907061
site_5131	0.472027	0.162172	0.0373584	0.0169161	0	0.269439	0.0420873
site_5132	0.0476776	0.217915	0.36481	0.0300235	0	0.31534	0.0242334
site_5133	0.206467	0.252907	0.170526	0.0223455	0	0.245805	0.10195
site_5134	0.400321	0.333201	0.115094	0.00501474	0	0.146369	0
site_5135	0.21658	0.713321	0.0636832	0.00641527	0	0	0
site_5136	0.190773	0.0602493	0.030277	0.00124916	0	0.528453	0.188999
site_5137	0.266646	0.527359	0.169408	0.0365865	0	0	0
site_5138	0.41013	0.424806	0.0867907	0.0782735	0	0	0
site_5139	0.960888	0.0391122	0	0	0	0	0
site_5140	0.254909	0.503611	0.0466303	0	0	0.158816	0.0360333
site_5141	0.488646	0.163298	0.180235	0	0	0.0107134	0.157108
site_5142	0.00729435	0	0	0	0	0.00354726	0.989158
site_5143	0.724151	0.124198	0.0446373	0.0965392	0	0.00746643	0.00300843
site_5144	0.560777	0.179719	0.100859	0.123495	0.000276644	0.0348741	0
site_5145	0.350691	0.19757	0.377112	0	0	0.0674499	0.00717709
site_5146	0.676537	0.090826	0.00382614	0.092502	0	0.133603	0.00270638
site_5147	1	0	0	0	0	0	0
site_5148	0.396297	0.350376	0.190338	0.0016831	0	0	0.0613048
site_5149	0.624728	0.275645	0.0164689	0.0193027	0	0.0165847	0.0472707
site_5150	0.0140839	0.0410767	0.0190908	0	0	0.877355	0.0483937
site_5151	0.0570762	0.47159	0.470242	0	0	0	0.0010922
site_5152	0.0718791	0.312844	0.331994	0	0	0.129845	0.153439
site_5153	0.465618	0.00111187	0.000162099	0	0	0.274985	0.258123
site_5154	0.0787471	0.16061	0.0443232	0.000922551	0	0.460167	0.25523
site_5155	0.00530003	0.0695635	0.440351	0.000545345	0	0.401926	0.0823133
site_5156	0.00634393	0.381048	0.321696	0	0	0.114339	0.176574
site_5157	0.740191	0.0696628	0.152113	0.0380332	0	0	0
site_5158	0.991872	0.000396283	0.00773218	0	0	0	0
site_5159	0.107435	0.471738	0.417537	0.00328991	0	0	0
site_5160	0.346479	0.43417	0.0734477	0.145627	0.000275646	0	0
site_5161	0.269228	0.211346	0.0390181	0	0	0.0805312	0.399876
site_5162	0.530597	0.0847315	0.202905	0.100223	0	0.0815435	0
site_5163	0.397288	0.33443	0.117679	0.0469864	0	0.034171	0.0694452
site_5164	0.245551	0.315067	0.428895	0	0	0.00524338	0.0052434
site_5165	0.925881	0.0492184	0.0249005	0	0	0	0
site_5166	0.0810317	0.297983	0.475951	0.125663	0	0.0193715	0
site_5167	0.506934	0.493066	0	0	0	0	0
site_5168	0.00168293	0.753835	0.0420563	0	0	0.141609	0.0608167
site_5169	0.274571	0.049429	0.00822948	0.189407	0	0.478363	0
site_5170	0.207353	0.640904	0.148748	0	0	0	0.00299478
site_5171	0.151154	0.483883	0.0662329	0.000153821	0	0.199346	0.0992301
site_5172	0.496768	0.38292	0.0283009	0.0121309	0	0.0798804	0
site_5173	0.630642	0.261807	0.0403322	0.0212864	0	0.0456527	0.000280079
site_5174	0.295819	0.356163	0.265703	0.0027118	0	0	0.0796028
site_5175	0.693436	0.162926	0.062218	0.0509446	0	0.0304745	0
site_5176	0.138279	0.554248	0.0826164	0.00495682	0	0.136725	0.083175
site_5177	0.259663	0.382255	0.0998263	0.156071	0	0.0851206	0.0170636
site_5178	0.0681541	0.375075	0.207294	0.0114238	0	0.278628	0.0594249
site_5179	0.111142	0.617707	0.271151	0	0	0	0
site_5180	0.605232	0.303185	0.0799429	0.01164	0	0	0
site_5181	0.113366	0.484097	0.327718	0.0416011	0	0.0248439	0.00837434
site_5182	0.406358	0.302622	0.0169384	0.0694996	0	0.193369	0.0112137
site_5183	0.764204	0.090178	0.00992716	0	0	0.126673	0.00901841
site_5184	0.0124798	0.510723	0.025125	0	0	0.202001	0.249671
site_5185	0.187739	0.559646	0.0666806	0.000825982	0	0.0217507	0.163357
site_5186	0.0722854	0.314147	0.35288	0.00723045	0	0.186586	0.0668712
site_5187	0.34013	0.135566	0.421973	0.00355703	0.00820838	0.0826309	0.00793462
site_5188	0.08686	0.497533	0.305431	0.105306	0	0	0.00487007
site_5189	0.0454366	0.168294	0.71641	0	0	0.0687718	0.00108729
site_5190	0.331795	0.0226574	0.645547	0	0	0	0
site_5191	0.183926	0.0593192	0.199789	0.0076286	0	0.483937	0.0654003
site_5192	0.0587612	0.198987	0.45134	0	0	0.0318007	0.259111
site_5193	0.0519369	0.289038	0.648794	0	0	0	0.0102307
site_5194	0.00465739	0.48291	0.0529156	0	0	0.456269	0.00324839
site_5195	0.130557	0.591375	0.278068	0	0	0	0
site_5196	0.23749	0.00739852	0.755111	0	0	0	0
site_5197	0.985907	0.0140935	0	0	0	0	0
site_5198	0.00194991	0.64529	0.345357	0	0	0	0.00740308
site_5199	0	1	0	0	0	0	0
site_5200	0.147694	0.593356	0.224973	0.00135914	0	0.0326191	0
site_5201	0.128508	0.820072	0.0142445	0	0	0	0.0371763
site_5202	0.0332617	0.746014	0.00693642	0	0	0.18593	0.027858
site_5203	0.428255	0.218702	0.325983	0	0	0.0270603	0
site_5204	0.125274	0.760747	0.0472585	0.0667206	0	0	0
site_5205	0.882744	0.117256	0	0	0	0	0
site_5206	0.242432	0.603352	0.104542	0	0	0.0318719	0.0178023
site_5207	0.133926	0.264429	0.196239	0	0	0.289916	0.11549
site_5208	0.531859	0.00414284	0.463998	0	0	0	0
site_5209	0.458258	0.531311	0	0	0	0	0.0104302
site_5210	0.104355	0.168638	0.0392619	0	0	0.604893	0.0828513
site_5211	0.0369015	0.842816	0	0.116213	0	0	0.0040695
site_5212	0.654692	0	0	0	0	0.345308	0
site_5213	0.499781	0	0	0	0	0.500219	0
site_5214	0.750896	0.155796	0	0	0	0.0933077	0
site_5215	0.422204	0.193267	0.0590393	0.103667	0	0	0.221823
site_5216	0.504797	0.481434	0.0137695	0	0	0	0
site_5217	0	1	0	0	0	0	0
site_5218	0.0306839	0.448152	0.471507	0	0	0.0496563	0
site_5219	0.209535	0.0712304	0.0157851	0	0	0.640041	0.0634082
site_5220	0.375178	0.414458	0.210364	0	0	0	0
site_5221	0.775136	0.164653	0	0.000812187	0.00487329	0.0545258	0
site_5222	0.865315	0.111114	0	0.0235713	0	0	0
site_5223	0.256469	0.678691	0.00961164	0.00405145	0	0.048778	0.00239915
site_5224	0.967115	0.0328847	0	0	0	0	0
site_5225	0.121328	0.486399	0.00534644	0.385882	0.00104511	0	0
site_5226	0.00610738	0.767012	0.0759435	0	0	0.0954871	0.0554502
site_5227	0.702667	0.252125	0.037981	0	0	0.00722662	0
site_5228	0.151899	0.822883	0	0	4.11957e-06	0.00147551	0.0237388
site_5229	0.69056	0.186173	0.123268	0	0	0	0
site_5230	0.649018	0.297847	0	0	0	0	0.0531355
site_5231	0.607128	0.0865021	0	0	0	0.291727	0.0146432
site_5232	0.587022	0.3796	0	0	0	0.0333784	0
site_5233	0.197926	0.163238	0.00108613	0.389291	0.010683	0.237776	0
site_5234	0.292707	0.458097	0.150751	0.0106983	0.000545729	0.031925	0.0552759
site_5235	0.997152	0.00284843	0	0	0	0	0
site_5236	0.47428	0.52572	0	0	0	0	0
site_5237	0.63673	0.354902	0	0	0	0.00233893	0.00602863
site_5238	0.303687	0.0808321	0.615209	0	0	0	0.000271847
site_5239	0.638662	0.361338	0	0	0	0	0
site_5240	0.19933	0.156368	0.644301	0	0	0	0
site_5241	0.938369	0.0444317	0	0	0	0.0139234	0.00327611
site_5242	0.155754	0.678525	0.165455	0	0	0	0.00026597
site_5243	0.547982	0.0185072	0	0	0	0.379439	0.0540719
site_5244	0.6653	0.00820771	0.142687	0	0	0.0667964	0.117008
site_5245	0.184322	0.690711	0.124967	0	0	0	0
site_5246	0.460279	0.172764	0.328493	0	0	0.0384637	0
site_5247	0.731487	0.0853052	0	0	0	0.0203842	0.162823
site_5248	0.246211	0.398853	0.332732	0	0	0.0222041	0
site_5249	0.166767	0.827279	0.000531525	0.00406154	0	0.00109496	0.000265762
site_5250	0.762312	0.237688	0	0	0	0	0
site_5251	0.0173228	0.980556	0.00212121	0	0	0	0
site_5252	0.274827	0.265072	0.129813	0.186343	0.0117884	0.1	0.032156
site_5253	0.566186	0.433814	0	0	0	0	0
site_5254	0.764981	0.235019	0	0	0	0	0
site_5255	0.325674	0.30985	0.314408	0	0	0.00513296	0.0449355
site_5256	0.115246	0.807011	0.0777433	0	0	0	0
site_5257	0.481401	0.0327767	0	0	0	0.450092	0.0357298
site_5258	0.921297	0.0724891	0.00621375	0	0	0	0
site_5259	0.601184	0.0103843	0	0	0	0.263148	0.125284
site_5260	0.112617	0.748224	0.00026663	0	0	0.138893	0
site_5261	0.106071	0.259942	0.633988	0	0	0	0
site_5262	0.967457	0.0325425	0	0	0	0	0
site_5263	0.853903	0.124583	0	0	0	0.00268753	0.0188273
site_5264	0.861288	0.012419	0	0.0131273	0	0.109436	0.00372962
site_5265	0.998906	0	0	0.00109366	0	0	0
site_5266	1	0	0	0	0	0	0
site_5267	0.6209	0.0149491	0.364151	0	0	0	0
site_5268	0.850747	0.142735	0.00651842	0	0	0	0
site_5269	0.0557923	0.421766	0	0	0	0.257549	0.264893
site_5270	0.937948	0.0620522	0	0	0	0	0
site_5271	0.17553	0.0885783	0.572213	0.0999765	0	0.0462778	0.0174249
site_5272	0.0204044	0.522845	0.45675	0	0	0	0
site_5273	0.993081	0.00691862	0	0	0	0	0
site_5274	0.505566	0	0	0	0	0.477168	0.0172664
site_5275	0.899583	0.0919083	0.000715715	0.00779276	0	0	0
site_5276	0.411902	0.0649356	0.461861	0	0	0.0547803	0.00652094
site_5277	0.493948	0.129952	0.0688887	0	0	0.293013	0.0141989
site_5278	0.0815396	0.684065	0.0310629	0.104246	0	0.0919266	0.00716077
site_5279	0.00426702	0.744199	0.056918	0	0	0.173861	0.0207543
site_5280	0.903976	0.0852655	0	0.0107583	0	0	0
site_5281	0.79601	0.00109506	0	0	0	0.199062	0.00383262
site_5282	0.423895	0.535196	0.00420925	0	0	0.0140956	0.022604
site_5283	0.131843	0.288715	0.525471	0.0539706	0	0	0
site_5284	0.754764	0.220353	0.00270473	0	0	0.0221781	0
site_5285	0.372288	0.276122	0.02702	0	0	0.285441	0.0391289
site_5286	0.720233	0.243247	0	0.0340671	0.00245287	0	0
site_5287	0.977931	0.0220689	0	0	0	0	0
site_5288	0.480314	0.0272899	0.0996397	0.00218387	0	0.300602	0.0899704
site_5289	0.268242	0.00858737	0.72317	0	0	0	0
site_5290	0.485538	0.246316	0	0.0122835	0	0.253814	0.00204829
site_5291	0.0292235	0.969958	0	0	0	0	0.000818143
site_5292	0.462222	0.34302	0.194758	0	0	0	0
site_5293	0.15579	0.178961	0.66525	0	0	0	0
site_5294	0.928957	0.0666791	0	0	0	0.00436419	0
site_5295	0.0158323	0.714964	0.125389	0	0	0.140616	0.00319866
site_5296	0.708226	0.243282	0.00797038	0	0	0.0405209	0
site_5297	0.384468	0.150268	0.0828558	0	0	0.380527	0.00188066
site_5298	0.203332	0.783168	0	0	0	0	0.0134995
site_5299	0.0968996	0.157149	0.178479	0	0	0.281208	0.286264
site_5300	0.567436	0.00122644	0	0	0	0.164489	0.266849
site_5301	0.242687	0.71548	0.0404634	0.00136919	0	0	0
site_5302	0.130863	0.179091	0.00163638	0.688409	0	0	0
site_5303	0.917313	0.0826872	0	0	0	0	0
site_5304	1	0	0	0	0	0	0
site_5305	0.540422	0.0085703	0	0	0	0.406817	0.0441913
site_5306	0.578407	0.300215	0.106353	0.0142083	0.00081607	0	0
site_5307	0.651061	0.342502	0.00643693	0	0	0	0
site_5308	0.547866	0	0	0	0	0.232651	0.219483
site_5309	0.99637	0.0036297	0	0	0	0	0
site_5310	0.109408	0.758884	0.00227689	0	0	0.019951	0.10948
site_5311	0.0468772	0.883561	0.0695615	0	0	0	0
site_5312	0.174573	0.732184	0.0722152	0.0148816	0	0.00108228	0.00506461
site_5313	0.371066	0.434785	0.0947365	0.0994133	0	0	0
site_5314	0.298472	0.262396	0.304176	0.0967047	0.00134691	0.0366352	0.00026938
site_5315	0.720137	0.279282	0.000580722	0	0	0	0
site_5316	0.0314545	0.682919	0.282714	0	0	0	0.00291231
site_5317	0.467438	0.12676	0.081723	0.0134239	0	0.222391	0.0882642
site_5318	0.3364	0.6636	0	0	0	0	0
site_5319	1	0	0	0	0	0	0
site_5320	1	0	0	0	0	0	0
site_5321	0.574133	0.407408	0.00978381	0.00442264	0	0.00425251	0
site_5322	0.29321	0.70679	0	0	0	0	0
site_5323	0.610423	0.306517	0	0.0305456	0.0525141	0	0
site_5324	0.192079	0.493744	0.0215258	0.00197797	0.000268086	0.273248	0.017158
site_5325	1	0	0	0	0	0	0
site_5326	0.777133	0.219207	0	0	0	0	0.00365967
site_5327	0.922721	0.0772792	0	0	0	0	0
site_5328	0.411349	0.0265106	0.00216417	0	0	0.415639	0.144338
site_5329	0.27282	0.198545	0.198677	0	0	0.329687	0.000270738
site_5330	0.0274534	0.43116	0.509006	0	0	0.0323809	0
site_5331	0.429371	0.409338	0.159663	0	0	0.00162873	0
site_5332	0.669912	0.147616	0.139268	0.0423932	0	0.000810062	0
site_5333	0.221783	0.68043	0.0152746	0	0	0.0565193	0.0259937
site_5334	0.803136	0.196864	0	0	0	0	0
site_5335	0.601642	0.00191192	0	0	0	0.137848	0.258598
site_5336	0.967312	0.0326875	0	0	0	0	0
site_5337	0.20991	0.79009	0	0	0	0	0
site_5338	0.394939	0.176004	0.157091	0	0	0.271927	3.85877e-05
site_5339	0.939525	0.0604753	0	0	0	0	0
site_5340	0.12896	0.675488	0.159421	0.00559271	0	0.00532624	0.0252121
site_5341	0.0583777	0.0745632	0.867059	0	0	0	0
site_5342	0.477204	0.0375015	0.485294	0	0	0	0
site_5343	0.921685	0.0571257	0	0.020924	0	0.000264862	0
site_5344	0.0747025	0.152563	0.642118	0.124704	0.00591164	0	0
site_5345	0.872852	0.127148	0	0	0	0	0
site_5346	0.576031	0.00297471	0.412341	0	0	0	0.00865348
site_5347	0.673312	0.0839163	0.0051965	0.0820261	0	0.153648	0.00190129
site_5348	0.247699	0.597133	0.119962	0	0	0.0308781	0.00432745
site_5349	0.80246	0.0823405	0.000797096	0	0	0.114402	0
site_5350	0.367285	0.230715	0.402	0	0	0	0
site_5351	0.368364	0.292187	0.228354	0.00381976	0.00316544	0.103839	0.000271737
site_5352	0.54913	0.179386	0.00714874	0.00470193	0	0.259089	0.000544786
site_5353	0.107805	0.889267	0	0.000266194	0	0	0.00266183
site_5354	0.235502	0.675502	0.00846282	0.00292187	0	0.0476257	0.0299857
site_5355	0.0645157	0.935484	0	0	0	0	0
site_5356	0	0.322881	0.677119	0	0	0	0
site_5357	0.505637	0.358362	0.109922	0	0	0.0260786	0
site_5358	0.975209	0.0247907	0	0	0	0	0
site_5359	0.518222	0.284644	0.180119	0	0	0.00720355	0.0098119
site_5360	0.359782	0.632366	0	0.00785265	0	0	0
site_5361	0.799583	0.169486	0.0309311	0	0	0	0
site_5362	0.00293262	0.433003	0.414489	0	0	0.148509	0.00106643
site_5363	0.175594	0.754672	0.0010629	0.00504851	0	0.0521963	0.0114263
site_5364	0.839167	0.125449	0	0.0353844	0	0	0
site_5365	0.670797	0.00759808	0.00141967	0.00407039	0	0.25039	0.0657248
site_5366	0.642306	0.00755232	0	0.350142	0	0	0
site_5367	0.981002	0.0189975	0	0	0	0	0
site_5368	1	0	0	0	0	0	0
site_5369	0.228538	0.448776	0.0135964	0.00292328	0	0.306167	0
site_5370	0.0418691	0.165223	0.792908	0	0	0	0
site_5371	0.302879	0.569078	0.102232	0	0.0141467	0.0108545	0.000810854
site_5372	0.953628	0.0445235	0	0	0	0.00184856	0
site_5373	0.0455514	0.464769	0.487786	0	0	0.00189322	0
site_5374	0.0708238	0.928318	0.000857862	0	0	0	0
site_5375	0.249636	0.750364	0	0	0	0	0
site_5376	0.829506	0.0841997	0	0.084154	0	0.0021401	0
site_5377	0.945853	0.054147	0	0	0	0	0
site_5378	0.430436	0.157303	0.409802	0	0	0.00245903	0
site_5379	0.663554	0.192267	0	0	0	0.14418	0
site_5380	0.741875	0.156252	0.0484172	0	0	0.048503	0.0049521
site_5381	0.969728	0.0302717	0	0	0	0	0
site_5382	0.105714	0.622184	0	0	0	0.00133484	0.270767
site_5383	0.470206	0.439434	0.00821419	0.0612563	0.0153047	0.00319113	0.00239335
site_5384	0.997098	0.00290198	0	0	0	0	0
site_5385	0.572653	0.139004	0	0.0307575	0	0.257586	0
site_5386	0	0.0305323	0.969468	0	0	0	0
site_5387	0.335123	0.642861	0.00721218	0	0	0.0021369	0.0126666
site_5388	0.984924	0.0150764	0	0	0	0	0
site_5389	0.0211251	0.567144	0.409044	0.00268746	0	0	0
site_5390	0.218998	0.546987	0.00263634	0	0	0.230311	0.00106703
site_5391	0.176364	0.823636	0	0	0	0	0
site_5392	0.625008	0.0893812	0.107384	0	0	0.177953	0.000273898
site_5393	0.468769	0.513425	0.0178068	0	0	0	0
site_5394	0.00328633	0.994279	0	0	0	0	0.00243508
site_5395	0.0181345	0.308605	0.67326	0	0	0	0
site_5396	0.224328	0.207159	0.363038	0.0189969	0	0.130945	0.055533
site_5397	0.269643	0.126126	0.583071	0.0211601	0	0	0
site_5398	0.0811877	0.052914	0.000827783	0	0	0.770244	0.0948269
site_5399	0.470779	0.43503	0.0100102	0.0839068	0.000273452	0	0
site_5400	0.144615	0.659886	0.195499	0	0	0	0
site_5401	0.332701	0.0816781	0	0.0611129	0.00328622	0.471733	0.0494882
site_5402	0.512005	0.190006	0.0491402	0.126968	0.121881	0	0
site_5403	0.0261477	0.62509	0.297514	0	0	0	0.0512484
site_5404	0.678713	0.0428787	0.0904271	0	0	0.160539	0.0274426
site_5405	0.417378	0.335373	0.0121593	0	0	0.0248719	0.210218
site_5406	0.302151	0.16597	0.276948	0.254931	0	0	0
site_5407	0.698123	0.100182	0	0	0	0.191207	0.0104883
site_5408	0.517671	0.0819324	0.187742	0	0	0.133509	0.0791464
site_5409	0.0879943	0.785676	0.0587015	0	0	0.031213	0.0364147
site_5410	0.767354	0.232646	0	0	0	0	0
site_5411	0.664662	0.177044	0.102183	0.0032686	0	0.0386788	0.014164
site_5412	0.323634	0.352518	0.249635	0.0549667	0	0.0110451	0.00820084
site_5413	0.326664	0.557697	0.0474973	0.000270402	0	0.0329895	0.034882
site_5414	0.688754	0.165435	0.116292	0	0	0.0262182	0.00330079
site_5415	0.139994	0.456561	0	0.000271182	0	0.400733	0.00244022
site_5416	0.102485	0.868152	0.0177763	0.0115871	0	0	0
site_5417	0.495067	0.254463	0.000544826	0.141631	0.0482163	0.0600783	0
site_5418	0.131158	0.28493	0.102898	0.0196111	0	0.37136	0.090042
site_5419	0.405612	0.225303	0.0725603	0	0	0.00798376	0.288541
site_5420	0.518719	0.127495	0.353515	0.00027076	0	0	0
site_5421	0.0560422	0.858368	0.0140466	0	0	0	0.0715437
site_5422	0.412946	0.133408	0.286456	0.00466054	0	0.16198	0.0005483
site_5423	0	0	0	0	0	1	0
site_5424	0.31092	0.0376414	0.496747	0.0073163	0	0.122446	0.0249299
site_5425	0.149886	0.474948	0.0060972	0	0	0.196617	0.172452
site_5426	0.0657107	0.278316	0.0849094	0	0.000273726	0.145838	0.424952
site_5427	0.0983926	0.830664	0.0384986	0.00911541	0	0	0.0233296
site_5428	0.00303605	0.996964	0	0	0	0	0
site_5429	0.367597	0.241726	0.276723	0.0189802	0	0.0938883	0.00108542
site_5430	0.70661	0.130171	0	0	0	0.0484052	0.114814
site_5431	0.00436459	0.432806	0.557158	0.00567154	0	0	0
site_5432	0.323423	0.18623	0.221804	0.00998111	0	0.23626	0.0223024
site_5433	0.000119477	0.853174	0.140457	0.00543336	0	0	0.000815854
site_5434	0.175397	0.614995	0.17908	0	0	0.0305283	0
site_5435	0.0542331	0.913388	0.0321091	0.000270155	0	0	0
site_5436	0.599493	0.191522	0	0.208985	0	0	0
site_5437	0.151371	0.307281	0.541349	0	0	0	0
site_5438	0.666788	0.0464323	0.0412796	0.0194948	0	0.220005	0.00600051
site_5439	0.0332031	0.117404	0.849393	0	0	0	0
site_5440	0.364698	0.546361	0.045273	0.0428533	0.000814708	0	0
site_5441	0.610693	0.351314	8.23e-06	0.0344692	0	0.00351598	0
site_5442	0.480514	0.440744	0.00646661	0	0	0.0203788	0.0518959
site_5443	0.681897	0.292749	0.00488632	0.00245604	0	0.00354765	0.0144636
site_5444	0.0919781	0.133847	0.748631	0.0255438	0	0	0
site_5445	0.718072	0.17349	0.01832	0.0367247	0	0.0533937	0
site_5446	0.460477	0.320549	0.117005	0.000543396	0	0.101155	0.000271698
site_5447	0.108311	0.542635	0.013173	0	0	0.321226	0.0146547
site_5448	0.167374	0.624922	0.0116331	0.126803	0	0	0.0692681
site_5449	0.215011	0.292294	0.215952	0.0149431	0.00675932	0.214	0.0410412
site_5450	0.58284	0.142785	0.242774	0	0	0.000271168	0.0313305
site_5451	0.7079	0.2921	0	0	0	0	0
site_5452	0.607632	0.136255	0.0480672	0.00708624	0	0.102188	0.0987716
site_5453	0.00110512	0.827992	0.170903	0	0	0	0
site_5454	0.428376	0.410695	0.0166192	0.00105299	0	0.0841843	0.0590726
site_5455	0.00962344	0.511291	0.343432	0	0	0.033952	0.101702
site_5456	0.261636	0.39018	0.170586	0.0170072	0	0.142493	0.0180974
site_5457	0.17208	0.681723	0.0869143	0	0	0.0576601	0.00162242
site_5458	0.34133	0.402883	0.178499	0	0	0.0772873	0
site_5459	0.115207	0.469742	0.0201774	0.000145316	0	0.297167	0.0975611
site_5460	0.280616	0.506649	0.181137	0.022415	0	0.00837209	0.000810201
site_5461	0.58872	0.097999	0	0.313281	0	0	0
site_5462	0.375044	0.196457	0.40394	0	0.00446815	0.0200914	0
site_5463	0.178319	0.277209	0.544473	0	0	0	0
site_5464	0.00110701	0.523091	0.0478781	0	0	0.308274	0.11965
site_5465	0.357809	0.161842	0.00606785	0.0019323	0.00189649	0.470452	0
site_5466	0.606035	0.168262	0.077386	0.000550506	0	0.147767	0
site_5467	0.114353	0.434619	0.449672	0.0013566	0	0	0
site_5468	0.179337	0.498453	0.0278139	0	0	0.117646	0.17675
site_5469	0.083783	0.653563	0.116057	0.000552186	0	0	0.146045
site_5470	0	0.94295	0.00469268	0.0523575	0	0	0
site_5471	0.0437099	0.253472	0.00577126	0.00633289	0	0.616243	0.0744707
site_5472	0.151043	0.510749	0.0850837	0	0	0.216985	0.0361401
site_5473	0.316039	0.554743	0.0502944	0	0	0.0652893	0.0136348
site_5474	0.856398	0.0536525	0	0	0	0	0.0899499
site_5475	0.930242	0.0329452	0.0300077	0	0.0068047	0	0
site_5476	0.0235096	0.153032	0.776441	0.0470172	0	0	0
site_5477	0.488181	0.181849	0.2349	0.0183714	0	0.0684211	0.00827674
site_5478	0.0495956	0.173228	0.00136817	0	0	0.491349	0.284459
site_5479	0.148044	0.143161	0.320047	0.0531104	0	0.216625	0.119013
site_5480	0.0925181	0.421088	0.379218	0	0	0.107175	0
site_5481	0.2478	0.454721	0.22325	0.0723033	0.000825408	0.000550282	0.000550281
site_5482	0.319789	0.028103	0	0.652108	0	0	0
site_5483	0.808944	0.0975363	0.000272269	0	0	0.023688	0.0695592
site_5484	0.873226	0.0214462	0.10522	0.00010775	0	0	0
site_5485	0.111262	0.246723	0.187273	0.452842	0.00190035	0	0
site_5486	0.958944	0.00509912	0	0.0359564	0	0	0
site_5487	0.265005	0.423981	0.0253146	0	0	0.083845	0.201853
site_5488	0.33085	0.291626	0.377524	0	0	0	0
site_5489	0.350209	0.598126	0.0420902	0	0	0	0.00957419
site_5490	0.152174	0.760521	0.0864908	0.000814606	0	0	0
site_5491	0.297732	0.194987	0	0	0	0.470157	0.0371243
site_5492	0.399909	0.376985	0.222059	0.00104686	0	0	0
site_5493	0.22809	0.557672	0.109611	0.0172116	0	0.0247447	0.0626711
site_5494	0.782342	0.0341703	0.00283735	0	0	0.142349	0.0383016
site_5495	0.172546	0.344814	0.438407	0.0442329	0	0	0
site_5496	0.296236	0.438079	0.0209261	0	0	0	0.244759
site_5497	0.0498986	0.942776	0	0	0	0	0.00732504
site_5498	0.51557	0.479109	0.00532076	0	0	0	0
site_5499	0.659064	0.100129	0.000275118	0.0103871	0.000720999	0.229149	0.000275124
site_5500	0.230739	0.505067	0.142151	0.122043	0	0	0
site_5501	0.187102	0.514449	0.000717268	0.0166886	0	0.134178	0.146865
site_5502	0.0129629	0.058683	0.473074	0	0	0.428028	0.0272518
site_5503	0.246883	0.204116	0.413112	0.0027292	0	0.132341	0.000818785
site_5504	0.503822	0.292245	0.148203	0.0047266	0	0.0251599	0.0258434
site_5505	0.986691	0.000271913	0	0.0130367	0	0	0
site_5506	0.0137282	0.358689	0.580715	0	0	0.0468676	0
site_5507	0.458572	0.117743	0.00223932	0	0	0.393109	0.0283369
site_5508	0.296346	0.490115	0.154926	0.0586129	0	0	0
site_5509	0.105452	0.894548	0	0	0	0	0
site_5510	0.113011	0.539252	0.291683	0.0560543	0	0	0
site_5511	0.499882	0.223098	0.126965	0.0173034	0	0.123559	0.00919219
site_5512	0.249325	0.106505	0.629625	0.0145452	0	0	0
site_5513	0.766096	0.218943	0.0130575	0	0	0.00190329	0
site_5514	0.7843	0.076997	0.000272008	0	0	0.0693451	0.0690863
site_5515	0.133968	0.596029	0.0258544	0.192393	0	0.0517561	0
site_5516	0.453603	0.229004	0.0065624	0.170414	0.0991293	0.041287	0
site_5517	0.0028041	0.974408	0.020088	0	0	0	0.00270011
site_5518	0	0.45439	0.498826	0	0	0.0372991	0.00948497
site_5519	0.525198	0.347282	0.126974	0	0	0	0.000546168
site_5520	0.165996	0.350005	0.00651056	0.0577855	0.00325509	0.21944	0.197008
site_5521	0.172204	0.54004	0.195278	0.00161779	0.00188742	0.0889728	0
site_5522	0.318194	0.329485	0.287418	0	0	0.0629932	0.00190991
site_5523	0.477965	0.0404646	0.450527	0.0163219	0	0.0147211	0
site_5524	0.290006	0.367119	0.206051	0.0322548	0	0.0883626	0.0162058
site_5525	0.630968	0.117205	0.0660016	0	0	0.179219	0.00660715
site_5526	0.0810624	0.421679	0.0272159	0.0525861	0.0106327	0.256847	0.149977
site_5527	0.087359	0.0110012	0.90164	0	0	0	0
site_5528	0.323952	0.507824	0.0556051	0	0.00876843	0.103851	0
site_5529	0.0684863	0.299481	0.0494476	0	0	0.191526	0.391059
site_5530	0.373952	0.278839	0.0225079	0.0466965	0	0.261436	0.016569
site_5531	0.215817	0.0999727	0.334083	0.00224143	0	0.347886	0
site_5532	0.440812	0.285006	0.0304939	0.111616	0	0.115023	0.0170495
site_5533	0.188826	0.330649	0.480526	0	0	0	0
site_5534	0.469085	0.00619077	0	0.524724	0	0	0
site_5535	0.593161	0.0133555	4.97561e-05	0.0126837	0	0.38075	0
site_5536	0.556768	0.244438	0.0345248	0.0822481	0	0.0820208	0
site_5537	0.0385294	0.22677	0.573468	0.000985485	0	0.159965	0.000282281
site_5538	0.336359	0.31745	0.179444	0.0806333	0.00141181	0.0847024	0
site_5539	0.82719	0	0	0.167418	0	0.00539286	0
site_5540	0.338279	0.0878247	0.0492332	0.00281648	0	0.395515	0.126331
site_5541	0.0632953	0.327566	0.17909	0	0	0.415445	0.0146043
site_5542	0.260341	0.25916	0.471653	0.00365954	0	0.00518625	0
site_5543	0.28247	0.624066	0.0477495	0.0457147	0	0	0
site_5544	0.35021	0.0705337	0.000563406	0	0	0.392353	0.18634
site_5545	0.90193	0.0980698	0	0	0	0	0
site_5546	0.143004	0.551628	0.122037	0.056668	0	0.126662	0
site_5547	0.344489	0.370495	0.217877	0.0553516	0	0.0117864	0
site_5548	0	1	0	0	0	0	0
site_5549	0.3483	0.0352355	0.00648238	0	0	0.417744	0.192238
site_5550	0.903218	0.0776354	0	0	0	0.0191469	0
site_5551	0.258023	0.323362	0.408976	0	0	0.00963895	0
site_5552	0.849593	0.150407	0	0	0	0	0
site_5553	0.766648	0.138271	0.0132073	0.0185375	0.03445	0.0288863	0
site_5554	0.297456	0.356591	0.170801	0	0.000845523	0.174307	0
site_5555	0.341986	0.246562	0.359073	0.0473022	0	0.00507743	0
site_5556	0.522841	0.359532	0.0231174	0.0823001	0.0056144	0	0.00659531
site_5557	0.16316	0.27646	0.536271	0.0241089	0	0	0
site_5558	0.299894	0.191753	0.0315441	0.476809	0	0	0
site_5559	0.237326	0.133044	0.578328	0.0297145	0.00508917	0.0164979	0
site_5560	0.11058	0.494317	0.342646	0.0372162	0.00517718	0.00781315	0.00225039
site_5561	0.0224871	0.159702	0.731258	0	0	0.0865528	0
site_5562	0.0313747	0.23577	0.652825	0.0794787	0.000551603	0	0
site_5563	0.432385	0.0806599	0.00340688	0.391023	0.00567831	0.0868468	0
site_5564	0.0140952	0.0052355	0.559978	0.0334863	0.00590766	0.381298	0
site_5565	0.0731215	0.0707687	0.313183	0.00371941	0	0.483628	0.0555795
site_5566	0.060008	0.665528	0.267629	0.0068352	0	0	0
site_5567	0	0.546712	0	0.239784	0.213503	0	0
site_5568	0.148651	0.429488	0.30392	0.00112765	0	0.116813	0
site_5569	0.133198	0.660748	0.0382958	0.0706265	0	0.0971318	0
site_5570	0.21717	0.219791	0.50279	0.0503429	0	0.0099062	0
site_5571	0.0531469	0.469272	0.142083	0.292326	0.0431719	0	0
site_5572	0.3372	0.149428	0.464597	0.0219798	0	0.0267952	0
site_5573	0	0	1	0	0	0	0
site_5574	0.269253	0.152012	0.119157	0.0205873	0	0.43899	0
site_5575	0.153046	0.120045	0.435357	0.00112876	0	0.290423	0
site_5576	0.0723964	0.154383	0.585195	0	0	0.188025	0
site_5577	0.473297	0.240247	0.0014074	0.285049	0	0	0
site_5578	0.360435	0.438779	0.00284802	0.120561	0.0706371	0.00674001	0
site_5579	0.300571	0.266013	0.0236618	0.0422971	0.0019718	0.278796	0.0866901
site_5580	0.151112	0.239707	0.609181	0	0	0	0
site_5581	0.284583	0.357211	0.0811682	0.234567	0.00196824	0.040503	0
site_5582	0.307918	0.496551	0.15162	0.0439109	0	0	0
site_5583	0.385738	0.444871	0.159227	0.0101641	0	0	0
site_5584	0.338551	0.268189	0.00140584	0.0461837	0	0.34567	0
site_5585	0.343633	0.476541	0.0670559	0.111364	0	0.00140674	0
site_5586	0	0.132332	0.867668	0	0	0	0
site_5587	0.00615409	0.377624	0.540415	0.051355	0.0244521	0	0
site_5588	0.544547	0.102562	0.0893868	0.0482235	0	0.21528	0
site_5589	0.0170935	0.100425	0.882481	0	0	0	0
site_5590	0.0543957	0.307891	0.358607	0.205694	0.0253549	0.0480579	0
site_5591	0.494429	0.233516	0.0310211	0.164176	0.000564031	0.0762939	0
site_5592	0.542287	0.119966	0.318326	0.0132092	0	0.00621187	0
site_5593	0.1289	0.464594	0.406506	0	0	0	0
site_5594	0.124381	0.141729	0.582125	0.00563236	0	0.146133	0
site_5595	0.263513	0.300824	0.399627	0.0360359	0	0	0
site_5596	0.0556091	0.281766	0.662061	0.000563462	0	0	0
site_5597	0.0922867	0.473931	0.424001	0.00978146	0	0	0
site_5598	0.0167169	0.552285	0.430982	1.56324e-05	0	0	0
site_5599	0.172222	0.0259077	0.801871	0	0	0	0
site_5600	0.664192	0.0501587	0.000328389	0	0	0.28504	0.000281674
site_5601	0.550903	0.346675	0.0114465	0.0378582	0	0.0531175	0
site_5602	0.486486	0.228872	0.224601	0	0	0.0193342	0.040707
site_5603	0.0632164	0.696053	0.173749	0.00592043	0	0.0610606	0
site_5604	0.887258	0.106009	0.00193549	0.00479777	0	0	0
site_5605	0.261875	0.451965	0.0084469	0	0	0.208015	0.069698
site_5606	0.816028	0.0395648	0	0	0	0.144408	0
site_5607	0.000843389	0.299886	0.686127	0.012893	0	0.000250733	0
site_5608	0.214082	0.285894	0.2334	0.0350318	0	0.218889	0.0127017
site_5609	0.199848	0.0074212	0.713793	0.00702683	0	0.0719111	0
site_5610	0.557748	0.294192	0.14806	0	0	0	0
site_5611	0.12678	0.176181	0.530466	0	0	0.165164	0.00140881
site_5612	0.900216	0.0995027	0	0.00028151	0	0	0
site_5613	0.280217	0.275087	0.240006	0.00606367	0	0.198627	0
site_5614	0.200466	0.157398	0.0118729	0.00905527	0.0191677	0.601477	0.000563587
site_5615	0.700847	0.0891642	0	0	0	0.20069	0.00929909
site_5616	0.409639	0.246765	0.0569525	0.0534087	0.00949938	0.216969	0.00676671
site_5617	0.435011	0.117652	0	0	0	0.368997	0.0783398
site_5618	0.127801	0.130169	0.740909	0.00112156	0	0	0
site_5619	0.666886	0.0629705	0.242213	0.0240203	0	0.00391013	0
site_5620	0.0369476	0.116744	0	0.0123501	0	0.830856	0.00310216
site_5621	0.0536908	0.129029	0.795872	0.0214088	0	0	0
site_5622	0.148718	0.367138	0.0192644	0.00297178	0.0011185	0.46079	0
site_5623	0.082187	0.316443	0.565536	0.0358339	0	0	0
site_5624	0.081013	0.732307	0.129466	0.0572143	0	0	0
site_5625	0.264958	0.00531015	0.723484	0	0	0.00624708	0
site_5626	0.626849	0.185866	0.133306	0	0	0.0539796	0
site_5627	0.085364	0.633894	0.280742	0	0	0	0
site_5628	0.0191475	0.491321	0.489531	0	0	0	0
site_5629	0	0.0428831	0.950614	0	0	0.00650315	0
site_5630	0.33651	0.471305	0.0722285	0.117136	0	0.0028204	0
site_5631	0.878175	0.118974	0.00285114	0	0	0	0
site_5632	0.0205842	0.385394	0.586409	0.00761306	0	0	0
site_5633	0.0222464	0.197397	0.559765	0	0.0392177	0.181373	0
site_5634	0.11119	0.0933053	0.636024	0.000565242	0.0135661	0.14535	0
site_5635	0.0381812	0.49404	0.467779	0	0	0	0
site_5636	0.0732023	0.00323848	0.922784	0	0	0.000774886	0
site_5637	0.366329	0.0224981	0.611173	0	0	0	0
site_5638	0.0935073	0.80061	0.105883	0	0	0	0
site_5639	0.413805	0.31205	0.036683	0.237462	0	0	0
site_5640	0.340493	0.179603	0.00195184	0.459419	0	0.0185325	0
site_5641	0.320084	0.0765185	0.267281	0.0066982	0.0113853	0.318033	0
site_5642	0.462688	0.176369	0.354395	0	0.000330626	0.00621702	0
site_5643	0.190896	0.112045	0.567973	0.00572517	0.00366848	0.119692	0
site_5644	0.371791	0.376853	0.175262	0.0760943	0	0	0
site_5645	0.652273	0.147413	0.15994	0.038688	0.00168598	0	0
site_5646	0.103873	0.41967	0.476457	0	0	0	0
site_5647	0.258886	0.380271	0.0310443	0.125497	0.00315523	0.198615	0.00253193
site_5648	7.43059e-05	0.297405	0.702521	0	0	0	0
site_5649	0.440919	0.254495	0	0.304024	0.000562161	0	0
site_5650	0.377137	0.254772	0.255636	0.111893	0.00056228	0	0
site_5651	0.530871	0.064852	0.404276	0	0	0	0
site_5652	0.0134907	0.345118	0.636236	0.00515524	0	0	0
site_5653	0.233407	0.00477705	0.761816	0	0	0	0
site_5654	0.110516	0.0617996	0.524755	0	0.00334285	0.299586	0
site_5655	0.763536	0.0247466	0.0946866	0.00349718	0	0.113534	0
site_5656	0.174315	0.101889	0.20026	0.0255536	0	0.485411	0.0125707
site_5657	0.680099	0.172785	0.147115	0	0	0	0
site_5658	0.52622	0.122493	0.178001	0.0276389	0	0.130116	0.0155313
site_5659	0.215747	0.199269	0.48991	0.00395349	0	0.0911206	0
site_5660	0.494193	0.223242	0.226986	0.0538275	0	0.00175102	0
site_5661	0.44533	0.244713	0.148198	0.16176	0	0	0
site_5662	0.00900282	0.861897	0.129101	0	0	0	0
site_5663	0.945795	0.0542047	0	0	0	0	0
site_5664	0.352956	0.255105	0.01999	0.118351	0.0121621	0.241436	0
site_5665	0.213401	0.334442	0.447108	0.00504923	0	0	0
site_5666	0.824054	0.040668	0	0	0	0.131913	0.00336505
site_5667	0	0.0509382	0.949062	0	0	0	0
site_5668	0.500332	0.444969	0.0217274	0.0329723	0	0	0
site_5669	0.7782	0.0901952	0.0180602	0	0	0.113545	0
site_5670	0.830687	0.168084	0.000283117	0.00094594	0	0	0
site_5671	0.189863	0.620086	0.162453	0.0275982	0	0	0
site_5672	0.247237	0.027683	0.485183	0.00308148	0	0.236816	0
site_5673	0.426647	0.34815	0.187089	0.0378335	0	0.00028073	0
site_5674	0.0234604	0.0126391	0	0.958564	0.00533644	0	0
site_5675	0.719171	0.0143406	0	0.256924	0	0.00956517	0
site_5676	0.861729	0.0379248	0.0920766	0.00826985	0	0	0
site_5677	0.486006	0.0707653	0.43595	0.00727875	0	0	0
site_5678	0.0557914	0.00252391	0.934954	0.00673054	0	0	0
site_5679	0.00336939	0.464392	0.530834	0.00140391	0	0	0
site_5680	0.26308	0.223654	0.0595738	0.268028	0.0171937	0.168471	0
site_5681	0.196068	0.601597	0.17651	0.0258252	0	0	0
site_5682	0.457145	0.305946	0.0043441	0.151891	0	0.0803941	0.000280117
site_5683	0.208768	0.0346867	0.135101	0	0	0.491369	0.130076
site_5684	0.125747	0.49147	0.299574	0.0648752	0.0183342	0	0
site_5685	0.049779	0.606037	0.267567	0.0766173	0	0	0
site_5686	0.699904	0.133567	0	0.104074	0.0103242	0.0521307	0
site_5687	0.488441	0.0712411	0.439757	0.000560409	0	0	0
site_5688	0.0258234	0.103919	0.851627	0.0186307	0	0	0
site_5689	0.229638	0.460581	0.184963	0.102675	0	0.0221429	0
site_5690	0.524978	0.215429	0.226295	0.0327324	0	0.000565335	0
site_5691	0.365469	0.202905	0.172574	0.0265326	0	0.232518	0
site_5692	0.194338	0.721777	0.0352646	0.0358526	0	0	0.0127674
site_5693	0.361967	0.40602	0.0820679	0.128023	0	0.0219225	0
site_5694	0.630917	0.28895	0.00232461	0.00720165	0	0.0706069	0
site_5695	0.492275	0.129866	0.36379	0.0140693	0	0	0
site_5696	0.55429	0.149936	0.26402	0.0235604	0	0.00819401	0
site_5697	0.219939	0.0657914	0.439014	0.0020774	0	0.273178	0
site_5698	0.305248	0.405514	0.147503	0.105186	0	0.0365493	0
site_5699	0.663158	0.173732	0.0494123	0.111128	0	0.00257047	0
site_5700	0.3607	0.043692	0.365533	0.0374031	0	0.192671	0
site_5701	0.0619975	0.813063	0.109927	0.0150127	0	0	0
site_5702	0.116628	0.616019	0.233084	0.0342688	0	0	0
site_5703	0.403645	0.398895	0.169626	0.0201635	0	0.00766985	0
site_5704	0.189458	0.211905	0.594873	0.00376456	0	0	0
site_5705	0.418075	0.0657707	0.446041	0	0	0.0701129	0
site_5706	0.335038	0.220898	0.00841637	0.412811	0.000281921	0.0225539	0
site_5707	0.0451768	0.139692	0.0390383	0.766521	0.00929069	0.000281523	0
site_5708	0.0190236	0.0669378	0.914039	0	0	0	0
site_5709	0.273681	0.0680486	0	0.00109057	0	0.65718	0
site_5710	0.860753	0.139247	0	0	0	0	0
site_5711	0.0304326	0.396928	0.552548	0.0198103	0	0	0.000280869
site_5712	0.269591	0.111564	0.618845	0	0	0	0
site_5713	0.154793	0.61736	0.110021	0.1167	0	0.00112552	0
site_5714	0.42667	0.390758	0.0246952	0.157877	0	0	0
site_5715	0.0683446	0.779269	0.145641	0.00674589	0	0	0
site_5716	0.289095	0.31779	0.0734027	0.303612	0	0.0161008	0
site_5717	0.857567	0.113922	0	0.0159258	0	0.0125855	0
site_5718	0.382546	0.0918334	0.523885	0.00173518	0	0	0
site_5719	0.349742	0.163108	0.126304	0.336953	0.0238931	0	0
site_5720	0.510385	0.304572	0.0846275	0.100416	0	0	0
site_5721	0.468765	0.516019	0.0132432	0.00197244	0	0	0
site_5722	0.125666	0.41839	0.392141	0.063802	0	0	0
site_5723	0.250775	0.270776	0.230337	0.117289	0.00170945	0.129113	0
site_5724	0.0563742	0.286204	0.655656	0.0017664	0	0	0
site_5725	0.00805286	0.0646988	0.927248	0	0	0	0
site_5726	0.359685	0.0890165	0.378114	0.152885	0.0202991	0	0
site_5727	0.624081	0.173164	0.0465968	0.155312	0	0.000845459	0
site_5728	0.311519	0.625004	0.035088	0.0159263	0	0.0124631	0
site_5729	0.674574	0.152034	0.0225856	0.150806	0	0	0
site_5730	0.96842	0.03158	0	0	0	0	0
site_5731	0.924841	0.0751587	0	0	0	0	0
site_5732	0.97976	0.0202403	0	0	0	0	0
site_5733	0.372973	0.52442	0.0574564	0.0106982	0	0.034452	0
site_5734	0.15794	0.437646	0.198002	0.110612	0	0.0958009	0
site_5735	0.215196	0.361014	0.279029	0	0	0.144761	0
site_5736	0.349748	0.126728	0.416798	0.00124301	0	0.105482	0
site_5737	0.0491761	0.445467	0.505357	0	0	0	0
site_5738	0.602576	0.128832	0.00256709	0.266026	0	0	0
site_5739	0.096265	0.450258	0.174476	0.0372546	0.000173405	0.241572	0
site_5740	0.360026	0.188763	0.451211	0	0	0	0
site_5741	0.182816	0.31722	0.497158	0.00280613	0	0	0
site_5742	0.230727	0.400658	0.0961058	0.268288	0.000281425	0.00394006	0
site_5743	0.892978	0.0561692	0.039892	0.000281052	0	0.0106798	0
site_5744	0.0955075	0.547376	0.249227	0.0108454	0	0.0970436	0
site_5745	0.455957	0.12578	0.19832	0.0635277	0	0.156416	0
site_5746	0.285	0.441934	0.224149	0.048917	0	0	0
site_5747	0.249605	0.294436	0.386462	0.0694972	0	0	0
site_5748	0.157101	0.474815	0.265104	0.00688977	0	0.0958489	0.000240883
site_5749	0.99665	0.00333921	1.11813e-05	0	0	0	0
site_5750	0.0148009	0.419692	0.182064	0.0158287	0.0247237	0.342891	0
site_5751	0.720407	0.178282	0	0.0876127	0	0.0136992	0
site_5752	0.325433	0.215698	0.249439	0.171554	0.0048197	0.0330557	0
site_5753	0.703642	0.191195	0.0513917	0.0269959	0.000567249	0.0262082	0
site_5754	0.826898	0.127528	0.0121862	0.024383	0	0.00900423	0
site_5755	0.49936	0.377854	0.0948618	0.00734374	0	0	0.0205805
site_5756	0.50369	0.24166	0.246229	0.00842171	0	0	0
site_5757	0.468731	0.133626	0.0390591	0.00507189	0	0.343921	0.00959059
site_5758	0.257152	0.241218	0.322792	0.178839	0	0	0
site_5759	0.0725416	0	0	0	0	0.902375	0.0250835
site_5760	0.50227	0.28193	0.203922	0.00197974	0.000848446	0.00905022	0
site_5761	0.237321	0.351995	0.286544	0.0244659	0	0.0996737	0
site_5762	0.329966	0.0962805	0.544033	0.0291143	0	0.000606212	0
site_5763	0.288933	0.586148	0.0246169	0	0	0.100303	0
site_5764	0.513276	0.107058	0.34347	0.0152702	0.00169669	0.0192289	0
site_5765	0.152115	0.208961	0.632367	0.00655699	0	0	0
site_5766	0.42713	0.306271	0.0164478	0.000282417	0	0.24987	0
site_5767	0.736296	0.148712	0.0113476	0.0720713	0.00471974	0.0268537	0
site_5768	0.562176	0.127263	0.31056	0	0	0	0
site_5769	0.509099	0.11438	0.375951	0.000570115	0	0	0
site_5770	0.185191	0.339086	0.416246	0.0594777	0	0	0
site_5771	0.184141	0.583631	0.147022	0.0852058	0	0	0
site_5772	0.907957	0.0840122	0	0	0	0.0080308	0
site_5773	0.429338	0.217612	0.000269711	0.330393	0	0.0148348	0.00755225
site_5774	0.0128163	0.242595	0.266039	0	0	0.203431	0.275118
site_5775	0.266078	0.295584	0.000810318	0.21463	0	0.0906899	0.132208
site_5776	0.597466	0.0102232	0.163846	0	0	0.176598	0.0518673
site_5777	1	0	0	0	0	0	0
site_5778	0.837381	0.162074	0	0	0	0	0.00054459
site_5779	0.987472	0.0125283	0	0	0	0	0
site_5780	0.302568	0.539105	0.13494	0.00294721	0	0.0200282	0.000411374
site_5781	0.182468	0.314124	0.0472535	0.0791501	0	0.377004	0
site_5782	0.53574	0.299284	0.0236104	0	0	0.117006	0.0243598
site_5783	0.108678	0.0465919	0	0.00493647	0	0.522053	0.31774
site_5784	0.980473	0.0195265	0	0	0	0	0
site_5785	0.0294972	0.84598	0.0067642	0	0	0.116629	0.00112986
site_5786	1	0	0	0	0	0	0
site_5787	0.0962343	0.0481297	0	0	0	0.632298	0.223338
site_5788	0.336331	0.5558	0.100642	0.00722652	0	0	0
site_5789	0.612457	0.0778204	0	0.0235387	0	0.281058	0.0051265
site_5790	0.631611	0.210112	0.0302737	0.000811866	0.00108252	0.101753	0.0243556
site_5791	0.460631	0.444446	0.0909064	0	0	0.0037487	0.00026778
site_5792	0.317177	0.191272	0.00652025	0	0	0.457539	0.0274923
site_5793	0.625918	0.241646	0.0208204	0.111345	0.000269911	0	0
site_5794	0.435377	0.490304	0.0660156	0	0	0	0.00830301
site_5795	0.417758	0.250032	0.305925	0.0104259	0	0.0158595	0
site_5796	0.669774	0.276494	7.99328e-05	0.0536515	0	0	0
site_5797	0.00105033	0.538431	0.000525494	0	0	0.0671684	0.392825
site_5798	0.549558	0.388728	0.00598111	0	0	0.0557324	0
site_5799	0.534706	0.173699	0.291166	0.000429842	0	0	0
site_5800	0.96098	0.0390198	0	0	0	0	0
site_5801	0.635377	0.339763	0	0.000810652	0	0.00864689	0.0154022
site_5802	0.62468	0.363505	0	0	0	0.0118151	0
site_5803	0.0130386	0.126971	0.546304	0	0	0.133975	0.179712
site_5804	0.805296	0.0552291	0.139475	0	0	0	0
site_5805	0.684742	0.242439	0	0.0606842	0	0	0.0121349
site_5806	0.425436	0.0672005	0.150566	0	0	0.299844	0.0569536
site_5807	0.287018	0.376106	0.00491711	0.017724	0	0.0909417	0.223293
site_5808	0.393808	0.159927	0.446265	0	0	0	0
site_5809	0.403445	0.269573	0	0.00161542	0	0.243945	0.0814221
site_5810	0.172776	0.227377	0.467757	0.00489244	0	0.0279077	0.0992894
site_5811	0.00494482	0.994231	0	0	0	0	0.000824137
site_5812	0.462348	0.123838	3.37922e-05	0.0227114	0	0.350474	0.0405958
site_5813	0.121619	0.541439	0.262804	0.0155203	0	0.019584	0.039033
site_5814	0.205091	0.484051	0.0888157	0.0224973	0	0.199545	0
site_5815	0.773644	0.0419864	0.0212988	0	0	0.0391883	0.123883
site_5816	0.993057	0.00694253	0	0	0	0	0
site_5817	0.0337337	0.130569	0.00755601	0	0	0.63279	0.195351
site_5818	0.705165	0.244526	0	0	0	0	0.050309
site_5819	0.152398	0.418924	0.322998	0.0668564	0.0035677	0.0177626	0.0174935
site_5820	0.0879178	0.389418	0.0150978	0.0336815	0	0.436586	0.037299
site_5821	0.373857	0.304005	0.321865	0	0	0	0.000272509
site_5822	0.349591	0.0791205	0.0139414	0.557347	0	0	0
site_5823	0.471917	0.456415	0	0.0385105	0	0.0123005	0.0208571
site_5824	0.529404	0.265148	0	0	0	0.0918249	0.113623
site_5825	0.93757	0.0624295	0	0	0	0	0
site_5826	0.531001	0.106843	0.182869	0	0	0.0992738	0.0800137
site_5827	0.48444	0.341469	0.140758	0	0	0.00810131	0.0252309
site_5828	0.640474	0.049155	0.00164363	0	0	0.204246	0.104481
site_5829	0.0626351	0.666656	0.105798	0	0	0.162788	0.00212336
site_5830	0.960804	0	0	0	0	0.0391956	0
site_5831	0.734568	0.265432	0	0	0	0	0
site_5832	0.456199	0.252188	0.0528068	0	0	0.235774	0.00303258
site_5833	0.303883	0.137921	0	0	0	0.416612	0.141583
site_5834	0.152503	0.412493	0.140035	0	0	0.294969	0
site_5835	0.252952	0.37752	0.176407	0.00668751	0	0.186433	0
site_5836	0.75929	0.137903	0.102808	0	0	0	0
site_5837	0.966783	0.0332168	0	0	0	0	0
site_5838	0.615475	0.0393738	0	0.108999	0.0883307	0.147822	0
site_5839	0.748719	0.210609	0.0406718	0	0	0	0
site_5840	0.255104	0.372815	0.29931	0.0141616	0	0.0474434	0.0111661
site_5841	0.909114	0.090886	0	0	0	0	0
site_5842	1	0	0	0	0	0	0
site_5843	0.390907	0.436571	0	0	0	0.172521	0
site_5844	0.114905	0.290155	0.0562225	0.00637274	0	0.0963482	0.435996
site_5845	0.504904	0.0613603	0.40025	0.0165253	0	0.000269319	0.0166909
site_5846	0.522309	0.27781	0.0272954	0.0113326	0	0.0450585	0.116194
site_5847	1	0	0	0	0	0	0
site_5848	0.224859	0.20509	0.500917	0.0691343	0	0	0
site_5849	0.447646	0.110648	0	0.017373	0	0.414391	0.00994182
site_5850	0.300142	0.25182	0	0	0	0.0908204	0.357218
site_5851	0.243049	0.185965	0.283413	0.00181231	0	0.285762	0
site_5852	0.754949	0.166387	0.0330154	0	0	0.0300742	0.0155741
site_5853	0.262909	0.263103	0.0621346	0.0131994	0	0.206744	0.19191
site_5854	0.366388	0.509505	0.0059032	0.118204	0	0	0
site_5855	0.308962	0.0910587	0.577369	0.0226097	0	0	0
site_5856	0.288198	0.472062	0.210202	6.75909e-05	0	0.0294701	0
site_5857	0.784475	0.176346	0.000778213	0.0272979	0	0.0111029	0
site_5858	0.491591	0.250527	0.157758	0.0998544	0.000269289	0	0
site_5859	0.751205	0.246363	0	0.000270267	0	0.00216209	0
site_5860	0.0972688	0.447091	0.0653651	0	0	0.233771	0.156504
site_5861	0.149338	0.444618	0.108003	0.258672	0.0191378	0	0.0202325
site_5862	0.520929	0.355618	0.0762812	0.00214919	0	0.0345704	0.0104514
site_5863	0.378122	0.293747	0.0281437	0	0	0.299988	0
site_5864	0.137077	0.019338	0.586544	0	0	0.186392	0.0706487
site_5865	0.539235	0.276149	0.151911	0.0327052	0	0	0
site_5866	0.677778	0.167681	0.0233118	0.0432148	0	0.0877447	0.000269986
site_5867	0.471921	0.258084	0.269995	0	0	0	0
site_5868	0.464853	0.263096	0.0665415	0.20551	0	0	0
site_5869	0.439242	0.393384	0	0.000946364	0	0.076406	0.0900213
site_5870	0.0708192	0.907867	0.0123292	0.00898434	0	0	0
site_5871	0.852968	0.0721928	0.0246751	0.0155068	0	0.0346571	0
site_5872	0.761844	0.183162	0.0178315	0.0368901	0.000272035	0	0
site_5873	0.518182	0.343062	0.0919123	0.0457516	0	0.00109211	0
site_5874	0.313663	0.400446	0.259064	0.0268276	0	0	0
site_5875	0.905431	0.0610096	0	0	0	0.0315338	0.00202564
site_5876	0.207216	0.465433	0.216346	0.0442221	0	0.0627038	0.00407904
site_5877	0.0146365	0.759451	0.142294	0	0	0	0.0836177
site_5878	0.699683	0.0785555	0.00559049	0.00837494	0	0.165687	0.0421091
site_5879	0.0592339	0.541677	0.00513625	0	0	0.295265	0.0986878
site_5880	0.258221	0.734939	0	0.00283354	0	0	0.00400678
site_5881	0.485955	0.0972775	0.00080706	0.415961	0	0	0
site_5882	0.451705	0.40353	0.142893	0.00187151	0	0	0
site_5883	0.313024	0.610494	0	0	0	0.0764821	0
site_5884	0.54099	0.142421	0.0341219	0.116425	0	0.102074	0.063967
site_5885	0.212865	0.0928056	0.00644057	0.654731	0	0.0331574	0
site_5886	0.242184	0.214708	0	0.543108	0	0	0
site_5887	0.207605	0.194812	0.0637504	0	0	0.100309	0.433523
site_5888	0.0676079	0.29934	0.486466	0.0323515	0	0.112569	0.0016645
site_5889	0.241033	0.758695	0	0	0	0	0.000272415
site_5890	0.000266515	0.993978	0.00177483	0	0	0	0.0039807
site_5891	0.219584	0.646528	0.0509217	0.082966	0	0	0
site_5892	0.0143897	0.302805	0.00761809	0.675187	0	0	0
site_5893	0.466798	0.319057	0.0231581	0.190987	0	0	0
site_5894	0.487498	0.290137	0.21365	0.00871519	0	0	0
site_5895	0.677124	0.224513	0	0.0972839	0.00107878	0	0
site_5896	0.589601	0.128444	0.149092	0.107376	0	0.00296599	0.0225215
site_5897	0.111969	0.583084	0.300461	9.95185e-05	0	0	0.0043862
site_5898	0.640822	0.359178	0	0	0	0	0
site_5899	0.285221	0.210552	0	0.0269749	0	0	0.477252
site_5900	0.272263	0.195796	0.0240091	0	0	0.134644	0.373288
site_5901	0.960965	0	0	0.0390347	0	0	0
site_5902	0.428458	0.562024	0.00107078	0	0	0	0.00844728
site_5903	0.583327	0.213331	0.177033	0	0	0.0252447	0.00106467
site_5904	0.866883	0.130121	0.00299693	0	0	0	0
site_5905	0.695683	0.301633	0	0.0013419	0	0	0.00134186
site_5906	0.185599	0.0862911	0.462562	0	0	0.248187	0.0173605
site_5907	0.376218	0.401826	0.0222206	0.0254526	0	0.0531542	0.121129
site_5908	0.0104085	0.502269	0.214274	0.0708177	0.0170138	0.183349	0.00186815
site_5909	0.709836	0.0877021	0.00107426	0.178063	0.0233247	0	0
site_5910	0.786086	0.213891	0	0	0	2.24791e-05	0
site_5911	0.855795	0.105408	0.000817548	0.00917031	0	0.0288088	0
site_5912	0.325077	0.37183	0.295457	0.00419763	0	0	0.00343921
site_5913	0.307961	0.239111	0	0.175856	0.000618592	0.270336	0.00611729
site_5914	0.163858	0.539025	0.288595	0.00247401	0	0	0.00604773
site_5915	0.0327959	0.131225	0.31618	0.0211513	0	0.305424	0.193225
site_5916	0.390454	0.117804	0	0	0	0.273841	0.217901
site_5917	0.808719	0.0675185	0.0123845	0.111108	0.000269225	0	0
site_5918	0.189881	0.0222534	0.00055227	0	0	0.566228	0.221085
site_5919	0.354014	0.402491	0.0976005	0.00449833	0	0	0.141396
site_5920	0.0905462	0.901056	0.00416695	0.00423107	0	0	0
site_5921	0.978213	0.0189782	0	0.000267244	0	0.0025416	0
site_5922	0.671927	0.259223	0.00226139	0	0	0	0.0665882
site_5923	0.800016	0.0509106	0	0.139505	0	0	0.00956838
site_5924	0.127163	0.455668	0.416902	0	0	0	0.00026675
site_5925	0.334974	0.357694	0	0.0343077	0	0.268354	0.00466969
site_5926	0.680811	0.036623	0	0.0122629	0	0.270303	0
site_5927	0.762689	0.222936	0.000270465	0.0140645	0	0	4.05463e-05
site_5928	0.0943745	0.0977859	0.803759	0.00408096	0	0	0
site_5929	0.11077	0.0767924	0.0260348	0	0	0.12034	0.666063
site_5930	0.068526	0.0956513	0	0	0	0.174502	0.66132
site_5931	0.80659	0.133627	0.0282448	0.0310075	0	0	0.000531591
site_5932	0.265744	0.395711	0.170775	0.143796	0.000125757	0.0214632	0.00238481
site_5933	0.111037	0.79974	0.0502079	0	0	0.0198851	0.0191293
site_5934	0.210082	0.531274	0.123154	0.118885	0.00789415	0.00734971	0.00136106
site_5935	0.558718	0.0456315	0	0	0	0.345853	0.0497976
site_5936	0.287758	0.0814879	0	0	0	0.506582	0.124172
site_5937	0.442345	0.505832	0.0133035	0	0	0	0.0385188
site_5938	0.501009	0.300914	0.138095	0.0599821	0	0	0
site_5939	0.478933	0.421132	0.0454359	0.0544989	0	0	0
site_5940	0.604265	0.241258	0.132301	0.00504031	0.00190467	0.0152296	0
site_5941	0.0528856	0.207183	0	0.00403749	0	0.448322	0.287572
site_5942	0.033454	0.120763	0.0320211	0.0237778	0	0.393867	0.396117
site_5943	0.784477	0.202286	0.00161156	0.0116248	0	0	0
site_5944	0.727866	0.248967	0.0131581	0.00192901	0	0.00808046	0
site_5945	0.323316	0.122544	0.269677	0	0.000469065	0.283993	0
site_5946	0.0515564	0.944508	0.00393527	0	0	0	0
site_5947	0.319943	0.273405	0.283735	0	0	0	0.122916
site_5948	0.420597	0.395137	0.0964123	0.0797728	0	0.00808112	0
site_5949	0.68987	0.306404	0.00355432	0	0	0	0.000171278
site_5950	0.591632	0.00685064	0	0	0	0.401518	0
site_5951	0.836951	0.0917161	0.000275622	0.0710573	0	0	0
site_5952	0.35683	0.330786	0.148862	0.00082008	0	0.143566	0.0191358
site_5953	0.157151	0.262299	0.132659	0	0	0.411929	0.0359613
site_5954	0.334931	0.362828	0.289139	0.0131013	0	0	0
site_5955	0.00266239	0.823221	0.174117	0	0	0	0
site_5956	0.0746286	0.0393314	0.484918	0	0	0.401122	0
site_5957	0.853337	0.101585	0.0401859	0	0	0.00489204	0
site_5958	0.386101	0.276002	0.170205	0.00321402	0	0.164479	0
site_5959	0.132874	0.488226	0.354578	0	0	0	0.024321
site_5960	0.00532382	0.668829	0.325847	0	0	0	0
site_5961	0.16971	0.256789	0.564269	2.12156e-05	0	0	0.00921037
site_5962	0.839475	0.0087092	0	0	0	0.0487176	0.103098
site_5963	0.63413	0.0455111	0	0	0	0.220832	0.0995271
site_5964	0.0876148	0.606863	0.167753	0.00370965	0	0.107031	0.0270288
site_5965	0.516678	0.172483	0.0258673	0	0	0.0438221	0.241149
site_5966	0.163583	0.771434	0.064983	0	0	0	0
site_5967	0.380661	0.17195	0.172798	0	0	0.0947597	0.179831
site_5968	0.694166	0.137392	0.142217	0.0261338	9.03638e-05	0	0
site_5969	0.375465	0.0335682	0.570362	0	0	0.0184768	0.00212802
site_5970	0.364697	0.635303	0	0	0	0	0
site_5971	0.382739	0.17202	0.358632	0.0128829	0.00170122	0.0613946	0.0106308
site_5972	0.318911	0.0693016	0.397455	0	0	0.15935	0.054983
site_5973	0.130046	0.825314	0.0446398	0	0	0	0
site_5974	0.693853	0.169411	0.000264861	0.135942	0.000264862	0	0.000264854
site_5975	0.682831	0.309885	0	0	0	0	0.00728453
site_5976	0.627495	0.338893	0.003613	0	0	0	0.0299985
site_5977	0.80826	0.0963184	0.0833571	0.0120648	0	0	0
site_5978	0.507243	0.476234	0.0165233	0	0	0	0
site_5979	0.690923	0.195849	0	0	0	0	0.113228
site_5980	0.574318	0.405787	0.0156227	0.00427248	0	0	0
site_5981	0.39116	0.061471	0	0.067427	0	0.47133	0.00861124
site_5982	0.285817	0.3939	0.141781	0.178503	0	0	0
site_5983	0.613676	0.189771	0.00135979	0	0	0.0255426	0.169651
site_5984	0.308586	0.258131	0.122336	0.00114195	0	0.279576	0.0302287
site_5985	0.0111603	0.98884	0	0	0	0	0
site_5986	0.452504	0.123713	0	0	0	0.216158	0.207626
site_5987	0.585229	0.169363	0.0841336	0.142004	0	0.0192704	0
site_5988	0.0436636	0.252535	0.00258911	0	0	0.537911	0.163301
site_5989	0	0.297528	0.698529	0.00394328	0	0	0
site_5990	0.236089	0.570502	0.0819991	0.11141	0	0	0
site_5991	0.174542	0.814562	0.0108957	0	0	0	0
site_5992	0.560389	0.362007	0.0775452	0	0	5.92906e-05	0
site_5993	0.57395	0.425016	0	0	0	0	0.00103413
site_5994	0.00703088	0.38377	0.356092	0.253107	0	0	0
site_5995	0.442552	0.145967	0.00737668	0.0133876	0	0.197313	0.193403
site_5996	0.631329	0.296486	0.0297967	0.00348126	0	0.038907	0
site_5997	0.636048	0.329944	0.0141727	0.0143866	0	0.00544857	0
site_5998	0.558427	0.323294	0.0297093	0.057059	0	0.0153016	0.0162093
site_5999	0.0183289	0.54705	0.0186045	0.050677	0	0.0482509	0.317089
site_6000	0.110497	0.231749	0.0556318	0.00364226	0.000274376	0.524154	0.0740507
site_6001	0.36099	0.373385	0.0261077	0	0	0.15802	0.081498
site_6002	0.778052	0.14668	0.071425	0.00384295	0	0	0
site_6003	0.528788	0.41279	0.00133926	0.0533603	0.00372184	0	0
site_6004	0.970628	0.0291079	0	0.000264486	0	0	0
site_6005	0.700046	0.0828379	0.0924184	0.034105	0	0.0905924	0
site_6006	0.023855	0.415837	0.383001	0	0	0.16859	0.00871759
site_6007	0.411398	0.479601	0	0	0	0.0441766	0.0648237
site_6008	0.849978	0.0640205	7.70407e-05	0	0	0.083477	0.00244724
site_6009	0.395565	0.145187	0.000268889	0.458979	0	0	0
site_6010	0.296704	0.324714	0.0546606	0	0	0.312167	0.0117546
site_6011	0.493393	0.0459585	0	0	0	0.43599	0.0246593
site_6012	0.283215	0.702853	0.0131108	0	0	0	0.000821183
site_6013	0	0.416465	0.160112	0.000717159	0	0.312656	0.11005
site_6014	0.306838	0.349832	0.000547891	0.177165	0	0.116722	0.0488953
site_6015	0.243496	0.756504	0	0	0	0	0
site_6016	0.241524	0.500333	0.011139	0.0189213	0	0.227816	0.000267599
site_6017	0.347516	0.060333	0.504032	0.0137884	0	0.0732391	0.00109154
site_6018	0.163165	0.694146	0.142689	0	0	0	0
site_6019	0.0110989	0.30225	0.299715	0	0	0.219952	0.166985
site_6020	0.816861	0.172336	0	0.00776915	0	0.003034	0
site_6021	0.168711	0.204419	0.233298	0.000290156	0	0.12439	0.268892
site_6022	0.00515351	0.994846	0	0	0	0	0
site_6023	0.490861	0.112313	0	0.366754	0.00197502	0	0.0280975
site_6024	0.454553	0.319597	0.22345	0	0	0	0.00239987
site_6025	0.671651	0.235966	0.0745011	0.0178817	0	0	0
site_6026	0.103565	0.369305	0.306736	0.0094276	0.00161611	0.208543	0.000808035
site_6027	0.279185	0.242543	0	0	0	0.474533	0.00373951
site_6028	0.654291	0.250194	0.0138248	0.00539037	0	0.0762998	0
site_6029	0.4786	0.486306	0	0.0350944	0	0	0
site_6030	0.252198	0.147894	0.597231	0.0026768	0	0	0
site_6031	0.0310123	0.940468	0.0172193	0	0	0	0.0113001
site_6032	0.466971	0.0151862	0	0.517842	0	0	0
site_6033	0.56748	0.0773722	0.355147	0	0	0	0
site_6034	0.192564	0.246133	0.0141517	0	0	0.402527	0.144624
site_6035	0.107457	0.428337	0.00161639	0	0	0.38949	0.0730999
site_6036	0.393641	0.398685	0.000808455	0.100458	0	0.106407	0
site_6037	0.066535	0.0521677	0.00165095	0	0	0.434893	0.444753
site_6038	0.402949	0.435878	0.0342679	0.00328312	0.0997289	0.0238932	0
site_6039	0.21174	0.43999	0.00268099	0.345589	0	0	0
site_6040	0.756689	0.179759	0.0189254	0.0446257	0	0	0
site_6041	0.122277	0.0864014	0.78338	0	0	0.00275907	0.00518264
site_6042	0.525811	0.164609	0.285862	0.0237179	0	0	0
site_6043	0.143244	0.254673	0.595941	0.00614196	0	0	0
site_6044	0.0179308	0.241527	0.736769	0.00242515	0	0	0.00134737
site_6045	0.394814	0.125178	0.101261	0.012975	0	0.365772	0
site_6046	0.0286287	0.0597786	0.174548	0	0	0.407061	0.329984
site_6047	0.691646	0.108908	0	0.0472939	0	0.128579	0.023573
site_6048	0.475408	0.225188	0.102568	0.0100603	0	0.0519808	0.134794
site_6049	0.301864	0.32383	0.195772	0.110588	0	0.0676711	0.00027527
site_6050	0.389621	0.494541	0.10981	0.00575718	0	0	0.000270998
site_6051	0.475499	0.391652	0.0161102	0.11264	0	0.00406907	3.08768e-05
site_6052	0.427045	0.385268	0.0484209	0.0309816	0	0.000524575	0.10776
site_6053	0.821539	0.109291	0	0	0	0	0.0691692
site_6054	0.28383	0.187942	0.306303	0.0187064	0	0.203219	0
site_6055	0.611149	0.383956	0	0.000877726	0	0.00374943	0.000267816
site_6056	0.968416	0.0220426	0	0.00954178	0	0	0
site_6057	0.00919674	0.883609	0.00163418	0	0	0.0976615	0.00789865
site_6058	0.407509	0.0284024	0	0	0	0.387038	0.177051
site_6059	0.706141	0.0262393	0	9.5273e-08	0	0.266786	0.000833906
site_6060	0.319098	0.296167	0.1596	0.225136	0	0	0
site_6061	0.246643	0.26259	0.1592	0	0	0.204012	0.127555
site_6062	0.689104	0.257843	0.00110526	0	0	0.0519478	0
site_6063	0.00518511	0.630312	0.359867	0	0	0.0046357	0
site_6064	1	0	0	0	0	0	0
site_6065	0.00721006	0.0739619	0.918828	0	0	0	0
site_6066	1	0	0	0	0	0	0
site_6067	0.536756	0.164507	0.239504	0	0	0.0592333	0
site_6068	0.551803	0.0400574	0.40814	0	0	0	0
site_6069	0.14995	0.8469	0.00315009	0	0	0	0
site_6070	0.564005	0.0315357	0.40438	0	0	7.9842e-05	0
site_6071	0.589113	0.0484036	0	0.245672	0.000279786	0.116533	0
site_6072	0.759283	0.19664	0	0	0.00349368	0.00770952	0.0328734
site_6073	0.0447588	0.117221	0.418828	0.33736	0.00333998	0.078493	0
site_6074	0.269157	0.34733	0.147987	0.00304038	0	0.137457	0.095028
site_6075	0.462042	0.00501024	0.00111336	0	0	0.42816	0.103675
site_6076	0.39637	0.0191983	0.287693	0.0187912	0	0.277947	0
site_6077	0.0321424	0.00110582	0.506073	0	0	0.418101	0.0425773
site_6078	0.600339	0.0331693	0	0	0	0.293055	0.0734365
site_6079	0.307371	0.374957	0.108755	0.208917	0	0	0
site_6080	0.955594	0.044406	0	0	0	0	0
site_6081	0.545358	0.19654	0.0246546	0.183974	0.000837055	0.0486363	0
site_6082	0.775124	0.0961355	0	0.0283872	0	0.100354	0
site_6083	0.102121	0	0.897879	0	0	0	0
site_6084	0.988015	0.0119855	0	0	0	0	0
site_6085	0.83989	0.16011	0	0	0	0	0
site_6086	0.545328	0.00460103	0.394116	0	0	0	0.0559541
site_6087	0.376265	0.0442029	0.136784	0.0032374	0	0.439511	0
site_6088	0.331047	0.000279162	0.423773	0	0	0.199678	0.0452235
site_6089	0.910446	0.0676795	0	0.0218746	0	0	0
site_6090	0.86727	0.0215356	0	0.00221116	0	0.107878	0.00110557
site_6091	0.603274	0.129028	0.267698	0	0	0	0
site_6092	0.449984	0.0546048	0.0416507	0	0.0305292	0.4146	0.0086319
site_6093	0.249726	0.0944784	0.00921522	0.0606146	0.0761845	0.507753	0.00202866
site_6094	0.117066	0.306163	0.524317	0.0342917	0	0.0173244	0.00083827
site_6095	0.385601	0.0502473	0.555194	0.00109788	0	0.00785993	0
site_6096	0.0302778	0.0928575	0.419694	0.00139572	0	0.405413	0.0503618
site_6097	0.930887	0.066923	0	0	0	0.00218954	0
site_6098	0.361959	0.187521	0.450521	0	0	0	0
site_6099	0.502958	0.00222047	0.483698	0	0	0.0111231	0
site_6100	0.487285	0.0453399	0.467375	0	0	0	0
site_6101	0.0734322	0.0607076	0.786138	0	0	0.0797221	0
site_6102	0.197438	0.514328	0.171491	0.0219677	0	0.0939417	0.000834186
site_6103	0.238468	0.0289467	0.467595	0	0	0.220859	0.0441321
site_6104	0.103522	0.332842	0.563636	0	0	0	0
site_6105	0.179328	0.00805595	0.812616	0	0	0	0
site_6106	0.0622742	0.0331493	0.904576	0	0	0	0
site_6107	0.00093259	0.253599	0.745468	0	0	0	0
site_6108	0.536861	0.204646	0	0.096233	0	0.162259	0
site_6109	0.130791	0.25854	0.132238	0.175689	0	0.14725	0.155492
site_6110	0.520903	0.0124844	0	0.00220932	0	0.228995	0.235409
site_6111	0.137815	0.0593531	0.802831	0	0	0	0
site_6112	0.0842176	0.134455	0.000276204	0	0	0.430556	0.350495
site_6113	0	0.038992	0.961008	0	0	0	0
site_6114	0.52096	0.0980568	0	0	0	0.312129	0.068854
site_6115	1	0	0	0	0	0	0
site_6116	0.118477	0.0350256	0	0	0	0.823205	0.0232924
site_6117	0.883827	0.116173	0	0	0	0	0
site_6118	0.0870652	0.155505	0.668724	0	0	0.088706	0
site_6119	0.333419	0.626467	0.00755783	0	0	0.0286985	0.00385743
site_6120	0.971276	0.0287242	0	0	0	0	0
site_6121	0.86739	0.0445585	0.0880511	0	0	0	0
site_6122	0	0	1	0	0	0	0
site_6123	1	0	0	0	0	0	0
site_6124	0.502609	0.263999	0.15505	0.0164722	0	0.0615888	0.000279659
site_6125	1	0	0	0	0	0	0
site_6126	0.5956	0.165521	0	0	0	0.204663	0.034216
site_6127	0.727258	0.0113819	0	0.0172079	0.00305303	0.234077	0.00702272
site_6128	0.0576984	0.0966758	0.844961	0	0	0	0.000664623
site_6129	0.0761641	0.110862	0.219932	0.115176	0.000279247	0.477587	0
site_6130	0.49127	0.123185	0	0	0	0	0.385546
site_6131	0.610649	0.0616811	0.186166	0	0	0.116105	0.0253987
site_6132	0.740222	0.189525	0	0.0702532	0	0	0
site_6133	0.592677	0.0368264	0.370496	0	0	0	0
site_6134	0.588549	0.135902	0.203429	0.07212	0	0	0
site_6135	0.448975	0.546331	0	0	0	0.00085833	0.00383554
site_6136	0.382043	4.07218e-05	0.617916	0	0	0	0
site_6137	0.731362	0.209907	0.0587311	0	0	0	0
site_6138	0.277185	0.0198562	0.702958	0	0	0	0
site_6139	0.956182	0.0438179	0	0	0	0	0
site_6140	0.966924	0.0330762	0	0	0	0	0
site_6141	0.283504	0.0738542	0.570183	0	0	0.00578573	0.0666729
site_6142	0.754752	0.101081	0.00305414	0.0348816	0	0.106232	0
site_6143	1	0	0	0	0	0	0
site_6144	0.119225	0.506721	0.290688	0.0369128	0	0.0464533	0
site_6145	0.126523	0.263584	0.57573	0.0341619	0	0	7.74322e-07
site_6146	0.463363	0.536637	0	0	0	0	0
site_6147	0.363434	0.128565	0.504591	0.0034104	0	0	0
site_6148	0.261229	0.0667994	0.65951	0.00994947	0.0025126	0	0
site_6149	0.190032	0.0685728	0.73015	0	0	0.00531259	0.00593305
site_6150	1	0	0	0	0	0	0
site_6151	0.380885	0.0208608	0.466611	0	0	0.131644	0
site_6152	1	0	0	0	0	0	0
site_6153	0.955745	0.0163712	0.0278833	0	0	0	0
site_6154	1	0	0	0	0	0	0
site_6155	0.0616659	0.413157	0.39913	0.0131756	0	0.112871	0
site_6156	0.139309	0.00133053	0.666741	0	0	0.19262	0
site_6157	1	0	0	0	0	0	0
site_6158	0.352161	0.104555	0.129881	0	0	0.226381	0.187022
site_6159	0.974293	0.0163691	0	0.00933774	0	0	0
site_6160	0	0.176155	0.823845	0	0	0	0
site_6161	0.0885441	0.087391	0.824065	0	0	0	0
site_6162	0.477123	0.0880346	0.372256	0	0	0.0625863	0
site_6163	0.322843	0.137678	0.335999	0.096114	0	0.107365	0
site_6164	0.258276	0.121079	0.432017	0.0827691	0	0.105859	0
site_6165	0.0877001	0.567727	0.0106492	0.295483	0.00583202	0.032609	0
site_6166	0.0674385	0.0133792	0.919182	0	0	0	0
site_6167	0.492754	0.065856	0.427691	0.0134206	0	0.000277899	0
site_6168	0.652026	0	0.347974	0	0	0	0
site_6169	1	0	0	0	0	0	0
site_6170	1	0	0	0	0	0	0
site_6171	0.961892	0.0359047	0.0022033	0	0	0	0
site_6172	0.269263	0.291569	0.165511	0.110794	0	0.151438	0.0114245
site_6173	0.00995845	0.0153186	0.943801	0	0	0.0309217	0
site_6174	0.197505	0.333587	0.291989	0.00863147	0	0.0198587	0.148429
site_6175	0.0239839	0.823538	0.134482	0.017996	0	0	0
site_6176	0.156049	0.128355	0.421442	0.294154	0	0	0
site_6177	0.410025	0.0966218	0.45817	0.0218066	0.0133765	0	0
site_6178	0.0287837	0.0995482	0.862659	0.00900932	0	0	0
site_6179	0.36839	0.563035	0.000278461	0.0627262	0	0.00445554	0.00111388
site_6180	0.513464	0.358674	0.00555779	0.0261818	0	0.096123	0
site_6181	0.234019	0.504448	0.261534	0	0	0	0
site_6182	0.184304	0.400672	0.098661	0.133189	0	0.176514	0.00666012
site_6183	0.235374	0.613286	0.085769	0.0655716	0	0	0
site_6184	0.0972152	0.0328843	0.679225	0.00139087	0	0.189284	0
site_6185	0.838203	0.0728414	0	0	0	0.0707229	0.018233
site_6186	0.444365	0.0116863	0	0	0	0.543949	0
site_6187	0.976789	0.0215321	0	0.00167925	0	0	0
site_6188	0.840931	0.131267	0.000235942	0	0	0.0275662	0
site_6189	0.10805	0.595273	0.230759	0.0324911	0	0.0242982	0.00912898
site_6190	0.312191	0.256458	0.250817	0.0433994	0	0.136583	0.000551849
site_6191	0.0963358	0	0.903664	0	0	0	0
site_6192	0.868171	0.000873174	0.130956	0	0	0	0
site_6193	0.113824	0.00389667	0.882279	0	0	0	0
site_6194	0.255091	0.286519	0.0127376	0.400467	0.0407386	0.0044458	0
site_6195	0.784602	0.0718808	0.0266578	0.0419159	0	0.0749437	0
site_6196	0.00557941	0.0786682	0.864423	0	0	0.0510505	0.000278965
site_6197	0.399871	0.21003	0.390099	0	0	0	0
site_6198	0.229484	0.38146	0.11823	0	0	0.156283	0.114544
site_6199	0.244951	0.260014	0.330787	0.0363053	0	0.115218	0.0127243
site_6200	0.523588	0.00634535	0.470066	0	0	0	0
site_6201	0.0489107	0.00776974	0.94332	0	0	0	0
site_6202	0.933106	0.0668942	0	0	0	0	0
site_6203	0.433311	0.312436	0.253976	0	0	0	0.00027662
site_6204	0.0500033	0.223015	0.674802	0.0521797	0	0	0
site_6205	0.392115	0.0719801	0.454899	0.00043138	0	0.0321736	0.0484005
site_6206	0.351397	0.099918	0.527098	0.00140181	0	0.0201861	0
site_6207	0.130594	0	0.869406	0	0	0	0
site_6208	0.943931	0.0560692	0	0	0	0	0
site_6209	0.371347	0.281802	0.0399929	0.000857601	0	0.291037	0.0149636
site_6210	0.143515	0.112193	0.69796	0	0	0.0463319	0
site_6211	0.0640728	0.459989	0.405135	0.0632642	0.00279236	0.00195463	0.00279233
site_6212	0.388312	0.199634	0.188159	0	0	0.171652	0.0522431
site_6213	0.222841	0.341254	0.224025	0.00123657	0	0.207316	0.00332815
site_6214	0.147078	0.40002	0.331596	0.0871358	0	0.0341708	0
site_6215	0.0758765	0.196048	0.72393	0	0	0	0.00414631
site_6216	1	0	0	0	0	0	0
site_6217	0.268632	0.0343376	0.409661	0	0	0.287091	0.000279335
site_6218	0.530274	0.0582514	0.411475	0	0	0	0
site_6219	0.016513	0.773591	0.209896	0	0	0	0
site_6220	0.010421	0.208891	0.67101	0.0013962	0.0206194	0.0876617	0
site_6221	1	0	0	0	0	0	0
site_6222	0.34943	0.0147183	0.399708	0.00442019	0	0.189373	0.0423498
site_6223	0.890862	0.0313406	0.0777971	0	0	0	0
site_6224	0.169661	0.386548	0.0830077	0.120347	0.0156336	0.224548	0.000253797
site_6225	0.34761	0.105657	0.412591	0.0172386	0	0.116904	0
site_6226	0.514929	0.0923163	0.00703238	0.0030014	0	0.381614	0.00110682
site_6227	0.67148	0.111483	0.205676	0	0	0.011179	0.000182392
site_6228	0.846665	0.0426236	0.110711	0	0	0	0
site_6229	0.211807	0.145225	0.359106	0	0	0.283862	0
site_6230	0.0351007	0.00805748	0.95322	0.00362211	0	0	0
site_6231	1	0	0	0	0	0	0
site_6232	0.989362	0.0106378	0	0	0	0	0
site_6233	0.269898	0.141007	0.578185	0.0109099	0	0	0
site_6234	0.0890358	0.61377	0.275753	0.0208825	0	0	0.000557987
site_6235	0.528736	0.471264	0	0	0	0	0
site_6236	0.942305	0.0576947	0	0	0	0	0
site_6237	0.241737	0.354774	0.400708	0.00111223	0	0	0.00166833
site_6238	0.557097	0.0995865	0.338839	0.00447702	0	0	0
site_6239	0.375755	0.0486763	0.573047	0	0	0.00252209	0
site_6240	0.893918	0.0863849	0	0	0	0.0196974	0
site_6241	0.799028	0.195965	0	0	0	0	0.00500672
site_6242	0.233599	0.185448	0.58036	0.000592386	0	0	0
site_6243	0.202647	0.245936	0.248897	0.157387	0	0.145134	0
site_6244	0.163349	0.518164	0.173198	0	0	0.0579976	0.0872911
site_6245	0.853443	0.11617	0.0169721	0	0	0.0134152	0
site_6246	0.0649434	0.111939	0.789082	0.0340357	0	0	0
site_6247	0.156036	0.000357389	0	0	0	0.449861	0.393746
site_6248	0.282709	0.288376	0.297383	0.131532	0	0	0
site_6249	0.772871	0.227129	0	0	0	0	0
site_6250	0.107624	0.875889	0.0164876	0	0	0	0
site_6251	0.0162658	0.804406	0.17905	0	0	0	0.000278221
site_6252	1	0	0	0	0	0	0
site_6253	0.997498	0.00250169	0	0	0	0	0
site_6254	0.562117	0.249313	0.184996	0.00357345	0	0	0
site_6255	0.601843	0.229029	0.160487	0.00864133	0	0	0
site_6256	0.362544	0.155998	0.00112077	0	0	0.480337	0
site_6257	0.229481	0.34449	0.426029	0	0	0	0
site_6258	0.00169936	0.0113288	0.538482	0	0	0.424417	0.0240734
site_6259	0	0	1	0	0	0	0
site_6260	0.539163	0.28478	0.145458	0.0305994	0	0	0
site_6261	0.267894	0.332413	0.216698	0.00257473	0	0.180421	0
site_6262	0.912578	0.000280197	0	0	0	0.0871419	0
site_6263	0.121522	0.639758	0.0493317	0.189388	0	0	0
site_6264	0.0542301	0.380161	0.48284	0	0	0.0726539	0.0101146
site_6265	0.336801	0.201893	0.454835	0.00642836	0	4.265e-05	0
site_6266	0.571257	0	0	0	0	0.279669	0.149074
site_6267	0.0262243	0.384929	0.168923	0.329821	0.000158556	0.0899442	0
site_6268	1	0	0	0	0	0	0
site_6269	0.00796414	0.273936	0.0558249	0	0	0.662275	0
site_6270	0.385717	0.316575	0.0355312	0.0335279	0.151547	0.0771015	0
site_6271	0.485736	0.0488099	0.0163309	0	0	0.197498	0.251625
site_6272	0.0050906	0.105411	0.883812	0.00568631	0	0	0
site_6273	0.0820659	0.432633	0.365622	0.119678	0	0	0
site_6274	0.0571712	0.07465	0.159211	0.104545	0.00943682	0.544432	0.0505539
site_6275	0.138866	0.280201	0.155499	0.0129053	0	0.412528	0
site_6276	0.328334	0.351546	0.146855	0.123433	0.00647542	0.0420511	0.00130573
site_6277	0.183312	0.773591	0.0252829	0.0172569	0	0	0.000556656
site_6278	0.258608	0.332806	0.394195	0.0118213	0	0.00256954	0
site_6279	0.071957	0.164851	0.616211	0.146981	0	0	0
site_6280	0.332373	0.361256	0.0253716	0.0564891	0	0.223673	0.000836404
site_6281	0.902237	0.0479853	0	0	0	0.0497772	0
site_6282	0.445649	0.129503	0.0562595	0.0176336	0	0.280183	0.0707721
site_6283	0.0628163	0.854785	0.0823992	0	0	0	0
site_6284	0	0.218715	0.781285	0	0	0	0
site_6285	0.458964	0.161987	0.0709272	0.157866	0	0.0564182	0.0938378
site_6286	0.296309	0.217604	0	0	0	0.27424	0.211847
site_6287	0.329664	0.612296	0.0109705	0.0470704	0	0	0
site_6288	0.737253	0.173521	0	0.0858721	0.00335352	0	0
site_6289	0.0276977	0.0670554	0.899438	0.00580846	0	0	0
site_6290	0.0958202	0.365263	0.514028	0.0248887	0	0	0
site_6291	0.0431524	0.538964	0.417884	0	0	0	0
site_6292	0.142259	0.344416	0.358801	0	0	0.154524	0
site_6293	0.347364	0.196048	0.456588	0	0	0	0
site_6294	0.501042	0.34339	0.0462097	0.0257281	0	0.08363	0
site_6295	0.0299541	0.0197745	0	0.00224946	0	0.948022	0
site_6296	0.998041	0.00195891	0	0	0	0	0
site_6297	0.279108	0.283337	0.308732	0.126329	0	0.00249391	0
site_6298	0.994117	0.00588319	0	0	0	0	0
site_6299	0.213175	0.337318	0.384668	0.0413119	0	0.0235261	0
site_6300	0.654889	0.0792438	0.0346588	0	0	0.187905	0.0433026
site_6301	0.256462	0.0745874	0.668951	0	0	0	0
site_6302	0.205148	0.0572001	0.722765	0	0	0.0148874	0
site_6303	0.228135	0.641195	0.00732515	0.123345	0	0	0
site_6304	0.224321	0.387283	0.388396	0	0	0	0
site_6305	0.237275	0.256171	0.455949	0.029787	0	0.0208192	0
site_6306	0.950182	0.0498183	0	0	0	0	0
site_6307	0.501178	0.228361	0.156396	0.104967	0.00197325	0.00712586	0
site_6308	0.544588	0.0285812	0	0	0	0.0460603	0.38077
site_6309	0.889695	0.100471	0.00279532	0.00536125	0.00167721	0	0
site_6310	0.596046	0.291927	0	0	0	0	0.112027
site_6311	0.33855	0.204403	0.0234271	0.0733299	0.000557771	0.359732	0
site_6312	0.0962354	0.541764	0.304155	0	0	0.0578456	0
site_6313	0.20628	0.526128	0.256385	0.00529375	0	0	0.00591316
site_6314	0.795843	0.16489	0	0.0144669	0.0122608	0.0122609	0.000278657
site_6315	0.205486	0.623246	0.0264603	0	0	0.0750334	0.0697736
site_6316	0.0443247	0.0508412	0.902566	0.00226829	0	0	0
site_6317	0.0172839	0.193942	0.291335	0	0	0.398954	0.098486
site_6318	0.310405	0.114286	0.436699	0	0	0.138611	0
site_6319	0.470795	0.436497	0.0884919	0	0	0.00421631	0
site_6320	0.107582	0.408079	0.402796	0.0815428	0	0	0
site_6321	0.783007	0.202079	0.000549001	0.0140835	0	0	0.000281399
site_6322	0.00596904	0.00994826	0.984083	0	0	0	0
site_6323	0.457677	0.348962	0	0	0	0.193361	0
site_6324	0	0.997767	0	0	0	0	0.00223255
site_6325	0	0.834173	0.145617	0	0	0	0.0202098
site_6326	0.534495	0.277334	0.0734815	0.114689	0	0	0
site_6327	0.368593	0.53556	0.0929152	0.0013952	0	0.0004714	0.00106563
site_6328	0.117267	0.317434	0.194311	0.00323429	0	0.367754	0
site_6329	0.698571	0.276343	0.00851155	0.011745	0	0.0048292	0
site_6330	0.266963	0.443041	0.274543	0.0154536	0	0	0
site_6331	0.824502	0.168491	0.00392393	0	0	0.00308314	0
site_6332	0.659447	0.173915	0	0	0	0.121801	0.0448374
site_6333	0.597179	0.344814	0.0565975	0.00140919	0	0	0
site_6334	0.912797	0.0872027	0	0	0	0	0
site_6335	0.211671	0.173925	0.191795	0.072508	0	0.350102	0
site_6336	0.213174	0.346807	0.0489935	0.216939	0.174087	0	0
site_6337	0.447715	0.0646134	0	0.487672	0	0	0
site_6338	0.413939	0.43326	0.141874	0.000280189	0	0.0106467	0
site_6339	0.500728	0.00334304	0.0270918	0	0	0.3934	0.0754375
site_6340	0.803435	0.117704	0	0	0	0.0559974	0.0228637
site_6341	0.438947	0.311522	0.218879	0.0300946	0.000557255	0	0
site_6342	0.424482	0.335981	0.0716128	0.131023	0	0.0369013	0
site_6343	0.39054	0.323719	0.285181	0.000560094	0	0	0
site_6344	0.479437	0.412301	0.0492971	0.0589644	0	0	0
site_6345	0.311247	0.381854	0.0818191	0	0	0.196691	0.0283896
site_6346	0.348722	0.17524	0.333282	0.142756	0	0	0
site_6347	0.00673252	0.00681213	0.986455	0	0	0	0
site_6348	0.0250872	0.694885	0.280028	0	0	0	0
site_6349	0.0784429	0.214953	0.706604	0	0	0	0
site_6350	0.0542857	0.217252	0.688737	0.0397257	0	0	0
site_6351	0.212062	0.733445	0.0486907	0.00580248	0	0	0
site_6352	0.112502	0.496053	0.323408	0.068037	0	0	0
site_6353	0.153496	0.552992	0.2893	0	0	0.00168472	0.00252704
site_6354	0.223139	0.402037	0.367717	0.00710719	0	0	0
site_6355	0.999893	0.000107182	0	0	0	0	0
site_6356	0.408108	0.0730179	0.000309783	0.037216	0	0.471701	0.00964723
site_6357	0.799443	0.0532001	0	0.147357	0	0	0
site_6358	0.195259	0.546086	0.204357	0.0542987	0	0	0
site_6359	0.528512	0.175581	0.295907	0	0	0	0
site_6360	0.165537	0.584443	0.246958	0.00250486	0	0.000556627	0
site_6361	0.0590911	0.176704	0.725996	0.038209	0	0	0
site_6362	0	0.97871	0.000279633	0.0172065	0.00296525	0	0.000838879
site_6363	0.337209	0.612711	0.00833671	0.0409018	0	0	0.000841761
site_6364	0.0878799	0.00618955	0.765187	0	0	0.140744	0
site_6365	0.971523	0.0276278	0.00084922	0	0	0	0
site_6366	0.11068	0.788204	0.0935871	0	0	0	0.00752885
site_6367	0.0844235	0.159085	0.659216	0.0972758	0	0	0
site_6368	0.246991	0.637048	0.114566	0	0	0	0.00139431
site_6369	0.0936419	0.135642	0.604883	0.165834	0	0	0
site_6370	0.961713	0.0324789	0.00580787	0	0	0	0
site_6371	0.134807	0.0488977	0.816296	0	0	0	0
site_6372	0.971639	0.0283613	0	0	0	0	0
site_6373	0.482936	0.158653	0.124062	0	0	0.234349	0
site_6374	0.23558	0.21953	0.498322	0.0465679	0	0	0
site_6375	0.111719	0.525244	0.344286	0	0	0.0187507	0
site_6376	0.158279	0.486922	0.17977	0	0	0.17503	0
site_6377	0.347572	0.398662	0.0104183	0.070487	0.0139518	0.157514	0.00139519
site_6378	0.219704	0.110042	0.670254	0	0	0	0
site_6379	0.678885	0.315778	0.00392899	0.00140745	0	0	0
site_6380	0.675299	0.162026	0.0120092	0.00139643	0	0.0164026	0.132866
site_6381	0.891725	0.0702947	0.00309469	0.0348852	0	0	0
site_6382	0.422183	0.11002	0.46307	0	0	0.00472672	0
site_6383	0.0711805	0.494705	0.361514	0.0726006	0	0	0
site_6384	0.977197	0.0199919	0	0.00281125	0	0	0
site_6385	0.167168	0.571668	0.187676	0.0734883	0	0	0
site_6386	0.118442	0.512734	0.254412	0	0	0.000262151	0.114149
site_6387	0.0488524	0.224024	0.0189971	0	0	0	0.708127
site_6388	0.0835992	0.198084	0.2599	0	0	0.0938281	0.364589
site_6389	0.577244	0.0968564	0.301161	0	0	0.0247384	0
site_6390	0.000560219	0.366785	0.12552	0	0	0.0955436	0.411591
site_6391	0.01418	0.491115	0.448546	0	0	0.00367181	0.0424872
site_6392	0.395934	0.0917224	0.000530091	0	0	0.312219	0.199595
site_6393	0.420971	0.577551	0.00147778	0	0	0	0
[truncated: 1,107 more rows]

## Sheet: simpson_railway
ID	tree_250	grass_250	crop_250	built_250	bare_250	water_250	wetland_250
site_574	0.504244	0.185552	0.306339	0.00386475	0	0	0
site_575	0.455628	0.315394	0.225407	0.00357162	0	0	0
site_576	0.0127474	0.0689331	0.908723	0.00959646	0	0	0
site_577	0.0252274	0.00300064	0.968669	0.0031026	0	0	0
site_578	0.0310924	0.0284558	0.90782	0.0326313	0	0	0
site_579	0.413438	0.546485	0.0251028	0.0149742	0	0	0
site_580	0.279993	0.334865	0.376777	0.00836506	0	0	0
site_581	0.495043	0.230003	0.102936	0.172018	0	0	0
site_582	0.218425	0.12431	0.0145627	0.640228	0.00247469	0	0
site_583	0.254569	0.0701379	0.675019	0.000274647	0	0	0
site_584	0.918349	0.0404276	0	0.0412235	0	0	0
site_585	0.185231	0.145863	0.424203	0.244703	0	0	0
site_586	0.0124471	0.162382	0.709793	0.115378	0	0	0
site_587	0.315202	0.386209	0.14709	0.146544	0.000275352	0	0.00468096
site_588	0.856425	0.0833794	0	0.0540821	0.00611333	0	0
site_589	0.684422	0.048325	0.0322548	0.234175	0.000822898	0	0
site_590	0.671414	0.277273	0.0109802	0.040333	0	0	0
site_591	0.31789	0.233307	0.00221004	0.446592	0	0	0
site_592	0.220414	0.104559	0.000835406	0.67085	0.00334164	0	0
site_593	0.333603	0.0674485	0.354151	0.24066	0.00386131	0	0.000275816
site_594	0.0471101	0.327561	0.479157	0.146172	0	0	0
site_595	0.128162	0	0.871838	0	0	0	0
site_596	0.12554	0.0425756	0	0.828236	0.00364855	0	0
site_597	0.471094	0.0749186	0.00302797	0.427959	0	0.0230005	0
site_598	0.172527	0.151412	0.59737	0.0786911	0	0	0
site_599	0.817083	0.178026	0.00461515	0.000275959	0	0	0
site_600	0.928257	0.0347533	0	0.0369895	0	0	0
site_601	0.146371	0.155054	0.493763	0.173045	0.0317673	0	0
site_602	0.225912	0.141714	0.164108	0.461637	0.00662872	0	0
site_603	0.468915	0.450159	0.00369335	0.0758444	5.73153e-06	0.00138208	0
site_604	0.342372	0.182065	0.361936	0.101367	0.0122601	0	0
site_605	0.245145	0.114131	0	0.619926	0.00952966	0.0112678	0
site_606	0.207427	0.0428009	0.0157006	0.734071	0	0	0
site_607	0.034439	0.0370612	0.850757	0.074419	0.00332326	0	0
site_608	0.46096	0.0107443	0	0.528296	0	0	0
site_609	0.0602504	0.272282	0.0408401	0.625253	0	0.00137434	0
site_610	0.771534	0.0372492	0.000278645	0.19066	0.000278656	0	0
site_611	0.163979	0.0985701	0.38783	0.348784	0.00083685	0	0
site_612	0.608035	0.0167143	0	0.369743	0.00550846	0	0
site_613	0.405328	0.150308	0.387515	0.054918	0.000275913	0	0.00165558
site_614	0.426004	0.0990507	0.00110284	0.472464	0	0	0.00137848
site_615	0.791958	0.0605993	0	0.105553	0.0418895	0	0
site_616	0.164447	0	0.835553	0	0	0	0
site_617	0	0.0136867	0.97971	0.00660363	0	0	0
site_618	0.443848	0.33098	0.186182	0.0389907	0	0	0
site_619	0.0304544	0	0.969546	0	0	0	0
site_620	0.22638	0.036147	0	0.736923	0.000549546	0	0
site_621	0.202992	0.0056429	0.791365	0	0	0	0
site_622	0.0650238	0.138802	0.291489	0.504685	0	0	0
site_623	0.154399	0.343903	0.233094	0.268603	0	0	0
site_624	0.342051	0.440811	0.00358555	0.203519	0	0	0.0100334
site_625	0.569958	0.429208	0.000833596	0	0	0	0
site_626	0.0788939	0.00552204	0.915584	0	0	0	0
site_627	0.263083	0.105749	0.630539	0.000629406	0	0	0
site_628	0.629652	0.332378	0.0239638	0.0140059	0	0	0
site_629	0.00437962	0.142806	0.851996	0	0	0	0.000818575
site_630	0.0542504	0	0.94575	0	0	0	0
site_631	0.325249	0.00282719	0	0.671646	0.000277467	0	0
site_632	0.212	0.0540587	0.733941	0	0	0	0
site_633	0.805288	0.165779	0	0.0289324	0	0	0
site_634	0.106781	0.00331192	0.889907	0	0	0	0
site_635	0.548673	0.0434148	0	0.407912	0	0	0
site_636	0.125176	0.00408722	0.869919	0.000817434	0	0	0
site_637	0.257233	0.161252	0.00737765	0.55131	0.0228277	0	0
site_638	0.524313	0.0527871	0	0.4229	0	0	0
site_639	0.133583	0.141271	0.404782	0.131817	0.188546	0	0
site_640	0.435616	0.12488	0	0.439504	0	0	0
site_641	0.967339	0.0326614	0	0	0	0	0
site_642	0.255318	0.202786	0.157283	0.381618	0.00299531	0	0
site_643	0.194765	0.0986094	0.00323485	0.702842	0.00054835	0	0
site_644	0.184404	0.0292219	0.786374	0	0	0	0
site_645	0.195354	0.796135	0	0.00851109	0	0	0
site_646	0.298973	0.154564	0.0142913	0.531894	0.00027684	0	0
site_647	0.515184	0.184516	0.0479235	0.235891	0	0.0104414	0.00604509
site_648	0.0462737	0.0337994	0.849983	0.069944	0	0	0
site_649	0.403015	0.380213	0.171125	0.045646	0	0	0
site_650	0.01002	0.00804	0.974609	0.00733089	0	0	0
site_651	0.93353	0.0102209	0.0562492	0	0	0	0
site_652	0.170713	0.273618	0.452602	0.102512	0.000555638	0	0
site_653	0.719907	0.0688693	0.0113629	0.19958	0.000280235	0	0
site_654	0.328541	0.414883	0.235958	0.020618	0	0	0
site_655	0.909421	0.0125023	0	0.0780763	0	0	0
site_656	0	0.0827765	0.909291	0.00793292	0	0	0
site_657	0.368208	0.0369315	0.000276486	0.594307	0.000276469	0	0
site_658	0.161329	0.0933213	0.676116	0.0692335	0	0	0
site_659	0.31354	0.673175	0.00332135	0.00996395	0	0	0
site_660	0.681555	0.190275	0.12817	0	0	0	0
site_661	0.521223	0.100004	0.377959	0	0	0.000813424	0
site_662	0.0689962	0.288208	0.636752	0.00604357	0	0	0
site_663	0.51223	0.174574	0	0.312647	0.000549095	0	0
site_664	0.833945	0.154968	0	0.011087	0	0	0
site_665	0.433386	0.337247	0.00359975	0.225767	0	0	0
site_666	0.133463	0.213767	0.400502	0.24612	0.00614835	0	0
site_667	0.357879	0.269793	0.00583311	0.358156	0.00833887	0	0
site_668	0.76007	0.0404747	0.199456	0	0	0	0
site_669	0.34171	0.0380489	0.0845679	0.535673	0	0	0
site_670	0.446438	0.0766532	0.455248	0.0216604	0	0	0
site_671	0.353344	0.528143	0.103918	0.0145951	0	0	0
site_672	0.537082	0.111545	0.000279697	0.351094	0	0	0
site_673	0.0049492	0.227595	0.683732	0.0532207	0	0	0.0305027
site_674	0.428669	0.254274	0.000548308	0.316508	0	0	0
site_675	0.403362	0.00567898	0.587365	0.0035935	0	0	0
site_676	0.140138	0.0378647	0.819211	0.00278668	0	0	0
site_677	0.00804683	0.0217156	0.906695	0.0627097	0.000832427	0	0
site_678	0.675514	0.199052	0.021989	0.103445	0	0	0
site_679	0.169632	0.0514893	0.300495	0.476505	0.00187886	0	0
site_680	0.413667	0.315909	0.126584	0.140256	0.0035642	1.91396e-05	0
site_681	0.911067	0.0878391	0	0.00109417	0	0	0
site_682	0.0795233	0.286756	0.576266	0.0574546	0	0	0
site_683	0.59118	0.118782	0.00027762	0.288095	0.00166571	0	0
site_684	0.147864	0.0643028	0.739386	0.0484477	0	0	0
site_685	0.0124909	0.019801	0.958784	0.00892407	0	0	0
site_686	0.965702	0	0	0.0342982	0	0	0
site_687	0.244358	0.484877	0.262658	0.00810609	0	0	0
site_688	0.0413277	0.324778	0.61277	0.0186345	0.00248943	0	0
site_689	0.417948	0.319718	0.0166707	0.245664	0	0	0
site_690	0.00109971	0.00274924	0.954757	0.0413936	0	0	0
site_691	0.55691	0.08989	0.000274452	0.334263	0.0186627	0	0
site_692	0.22172	0.0575637	0.637274	0.00110674	0	0.0823358	0
site_693	0.323934	0.470145	0.194917	0.0110043	0	0	0
site_694	0.856579	0.0439568	0	0.00247291	0	0.0969914	0
site_695	0.0549613	0.00067371	0.944365	0	0	0	0
site_696	0.181132	0.555064	0.0035766	0.259677	0.000550248	0	0
site_697	0.64683	0.303397	0.0361786	0.0135952	0	0	0
site_698	0.0746656	0.190786	0.727377	0.00635038	0	0	0.00082108
site_699	0.607441	0.246768	0.0285503	0.117241	0	0	0
site_700	0.804267	0.147759	0.0479746	0	0	0	0
site_701	0.400665	0.0741847	0.525151	0	0	0	0
site_702	0.174152	0.240606	0.419841	0.143358	0.0220425	0	0
site_703	0.191127	0.210913	0.290264	0.307697	0	0	0
site_704	0.216965	0.181714	0.448467	0.130863	0.0219919	0	0
site_705	0.334121	0.0147056	0.651174	0	0	0	0
site_706	0.393259	0.345467	0.25632	0	0	0.0049542	0
site_707	0.133021	0.0981733	0.682299	0.0865075	0	0	0
site_708	0.154188	0.372316	0.401289	0.0722075	0	0	0
site_709	0.0765264	0.264972	0.133147	0.460708	0.0194242	0.0452225	0
site_710	0	0.0394183	0.956713	0.0038684	0	0	0
site_711	0.389901	0.23091	0.0380457	0.298776	0.0325554	0.00981217	0
site_712	0.495474	0.09131	0.250468	0.162748	0	0	0
site_713	0.0174391	0.0156044	0.959039	0.00791745	0	0	0
site_714	0.0924272	0.0785925	0.826228	0.00275185	0	0	0
site_715	0.428011	0.564742	0.00641129	0.000836248	0	0	0
site_716	0	0.00137657	0.996421	0.00220251	0	0	0
site_717	0.442517	0.553443	0	0.00404004	0	0	0
site_718	0.250498	0.158552	0.529497	0.0614531	0	0	0
site_719	0.565727	0.139124	0.295149	0	0	0	0
site_720	0.571601	0.208984	0.200907	0.0185082	0	0	0
site_721	0.68748	0.0520977	0.00221756	0.258205	0	0	0
site_722	0.988771	0.0112287	0	0	0	0	0
site_723	0.537475	0.302045	0.0201027	0.140377	0	0	0
site_724	0.587108	0.0554927	0.00467234	0.352727	0	0	0
site_725	0.357148	0.213658	0.316969	0.112225	0	0	0
site_726	0.406936	0.253933	0.000825204	0.330604	0.000550151	0	0.00715179
site_727	0.572057	0.336876	0.0910676	0	0	0	0
site_728	0.425552	0.437503	0	0.12942	0.00752463	0	0
site_729	0.0287818	0.0457742	0.875892	0.0495522	0	0	0
site_730	0.973615	0.000715722	0	0.0256692	0	0	0
site_731	0.0517247	0.112831	0.821133	0.0143113	0	0	0
site_732	0.360498	0.0361433	0.603358	0	0	0	0
site_733	0.604945	0.33609	0.0265625	0.0324026	0	0	0
site_734	0.363384	0.127523	0.4902	0.017819	0.00107474	0	0
site_735	0.201549	0.19145	0.607001	0	0	0	0
site_736	0.17979	0.580108	0.0995329	0.140568	0	0	0
site_737	0.386885	0.108307	0	0.504808	0	0	0
site_738	0.242273	0.186103	0.243143	0.328407	7.43316e-05	0	0
site_739	0.239565	0.340282	0.050209	0.369944	0	0	0
site_740	0	0.000554094	0.999446	0	0	0	0
site_741	0.429603	0.00584078	0.564557	0	0	0	0
site_742	0.0205956	0.059897	0.879438	0.0400698	0	0	0
site_743	0.351701	0.0576781	0.000276913	0.589885	0.00045938	0	0
site_744	0.00894125	0.178854	0.776387	0.0339058	0.00191275	0	0
site_745	0.317126	0.0834905	0.116045	0.458565	0.00166001	0.0231129	0
site_746	0.0198363	0.00464017	0.975524	0	0	0	0
site_747	0.365324	0.387272	0.0256155	0.153692	0.0510114	0.0170858	0
site_748	0.296681	0.537667	0.0335425	0.0609117	0	0	0.0711975
site_749	0.00234703	0.000551212	0.997102	0	0	0	0
site_750	0.312001	0.075109	0.61289	0	0	0	0
site_751	0.00546829	0.050453	0.943668	0.000410997	0	0	0
site_752	0.411154	0.46607	0.0639826	0.054609	0	0.00418392	0
site_753	0.553174	0.312449	0.131287	0.00308997	0	0	0
site_754	0.903773	0.0809753	0	0.015252	0	0	0
site_755	0.065346	5.4691e-05	0.934599	0	0	0	0
site_756	0.0546705	0.229964	0.709291	0.00138053	0	0	0.00469399
site_757	0.147754	0.0407865	0	0.811459	0	0	0
site_758	0.192018	0.0257008	0.782281	0	0	0	0
site_759	0.450505	0.0161832	0	0.532763	0.000548582	0	0
site_760	0	0.0838642	0.916136	0	0	0	0
site_761	0.122735	0.0883157	0.717709	0.0712401	0	0	0
site_762	0.20034	0.758952	0.036537	0.00417156	0	0	0
site_763	0.205016	0.216173	0.0659373	0.452462	0.000547656	0.000103528	0.0597607
site_764	0.989468	0.00669737	0	0.0038347	0	0	0
site_765	0.405377	0.174994	0.000611321	0.419017	0	0	0
site_766	0.12151	0.128642	0.555865	0.184029	0.00995432	0	0
site_767	0.154041	0.344932	0.0445248	0.456502	0	0	0
site_768	0.669885	0.00548339	0	0	0	0.324631	0
site_769	0.435179	0.126543	0.00715399	0.431124	0	0	0
site_770	0.000275667	0.0968279	0.900967	0.00192963	0	0	0
site_771	0	0.000774203	0.993738	0.00548795	0	0	0
site_772	0.953655	0.0304396	0	0	0	0.015905	0
site_773	0.966676	0.0238104	0	0.00951327	0	0	0
site_774	0.198565	0.31314	0.299524	0.188771	0	0	0
site_775	0	0.00905246	0.990948	0	0	0	0
site_776	0.144357	0.29292	0.562723	0	0	0	0
site_777	0.065704	0.294216	0.526722	0.112521	0.000837544	0	0
site_778	0.678755	0.242048	0.00219225	0.0770052	0	0	0
site_779	0.479307	0.148965	0.000374146	0.37132	3.48792e-05	0	0
site_780	0.0578953	0.47386	0.468245	0	0	0	0
site_781	0.460299	0.494962	0.0317181	0.0130201	0	0	0
site_782	0.476093	0.305566	0.000832531	0.215985	0.00152276	0	0
site_783	0.901153	0.0810996	0.0177479	0	0	0	0
site_784	0.580886	0.223012	0.17788	0	0	0.0179456	0.000276079
site_785	0.240986	0.588254	0.170507	0.000252492	0	0	0
site_786	0.0126476	0.116181	0.492836	0.311027	0.000276993	0.0670324	0
site_787	0.289598	0.233904	0.427526	0.0489729	0	0	0
site_788	0.642476	0.14496	0.179527	0.00110223	0.00204082	0.0296174	0.000275562
site_789	0.145509	0.0629688	0.564694	0.216548	0.000331489	0.00994913	0
site_790	0.671949	0.308318	0.00293019	0.0168028	0	0	0
site_791	0.836881	0.141677	0.0214417	0	0	0	0
site_792	0.114518	0.203569	0.60078	0.0769972	0.00413478	0	0
site_793	0.00690968	0.168003	0.802105	0.0229825	0	0	0
site_794	0.85027	0.0812458	0.00908711	0.0593971	0	0	0
site_795	0.525497	0.291871	0.143286	0.0393464	0	0	0
site_796	0.999909	9.0898e-05	0	0	0	0	0
site_797	0.0843774	0.0934405	0.130917	0.6287	0.0625645	0	0
site_798	0.0992959	0.230792	0.0108333	0.658801	0.00027778	0	0
site_799	0.481093	0.342508	0.000277638	0.135366	0	0.0407554	0
site_800	0	0.000581427	0.999419	0	0	0	0
site_801	0.307878	0.685437	0.00668454	0	0	0	0
site_802	0.199127	0.051825	0.749048	0	0	0	0
site_803	0.0179779	0.000831518	0.981191	0	0	0	0
site_804	0.713196	0.202273	0.00528677	0.0792442	0	0	0
site_805	0.306003	0.117328	0.428047	0.0119273	0	0.136694	0
site_806	0.434205	0.0785795	0.456529	0.0306873	0	0	0
site_807	0.122917	0.28655	0.557462	0.0330701	0	0	0
site_808	0.464663	0.164905	0.268955	0.000832012	0	0.100645	0
site_809	0.98378	0.00512826	0	0.0110915	0	0	0
site_810	0.617816	0.157069	0.225115	0	0	0	0
site_811	0.581445	0.403198	0.00932378	0.00603292	0	0	0
site_812	0.18002	0.30302	0.477959	0.0390011	0	0	0
site_813	0.610546	0.159744	0.224894	0.00481647	0	0	0
site_814	0.16038	0.00832594	0.831294	0	0	0	0
site_815	0.0887405	0.0137724	0	0.897487	0	0	0
site_816	0.322986	0.463843	0.208973	0.00419874	0	0	0
site_817	0.00303688	0.020157	0.971293	0.00551347	0	0	0
site_818	0.0826929	0.359997	0.252589	0.293705	0	0.0110156	0
site_819	0.83148	0.00463019	0.163889	0	0	0	0
site_820	0.103003	0.350746	0.178422	0.367283	0.000545764	0	0
site_821	0.414777	0.583374	0.00184897	0	0	0	0
site_822	0.760384	0.00987012	0.215027	0.0147193	0	0	0
site_823	0.145497	0.217116	0.517991	0.119397	0	0	0
site_824	0.434248	0.352813	0.18906	0.023879	0	0	0
site_825	0.381572	0.289669	0.328759	0	0	0	0
site_826	0.222476	0.661685	0.109375	0.00646374	0	0	0
site_827	0.506364	0.179027	0.314609	0	0	0	0
site_828	0.290315	0.0282447	0.67519	0.00625127	0	0	0
site_829	0.978774	0.0181939	0	0.00303241	0	0	0
site_830	0.614102	0.0692407	0.0119356	0.284073	0.0206485	0	0
site_831	0.262519	0.266812	0.0121082	0.458561	0	0	0
site_832	0.154043	0.151981	0.38627	0.307706	0	0	0
site_833	0.0878423	0.509934	0.386311	0.0159134	0	0	0
site_834	0.340054	0.145651	0.157446	0.356293	0.000555908	0	0
site_835	0.90722	0.0584773	0.0343031	0	0	0	0
site_836	0.266702	0.0406234	0.692401	0.000273533	0	0	0
site_837	0.131162	0.498589	0.195928	0.17432	0	0	0
site_838	0.983288	0.0167116	0	0	0	0	0
site_839	0.415607	0.121143	0	0.46325	0	0	0
site_840	0.281223	0.235387	0	0.48175	0	0	0.00163984
site_841	0.0019637	0.109465	0.881987	0.00658362	0	0	0
site_842	0.153544	0.189298	0.515493	0.135484	0	0.00247316	0.00370768
site_843	0.103586	0.834643	0	0.0609515	0.000819694	0	0
site_844	0.102518	0.0362434	0.830392	0.0308466	0	0	0
site_845	0.0802997	0.0930395	0.600145	0.226515	0	0	0
site_846	0.184626	0.227066	0.292498	0.295809	0	0	0
site_847	0.975123	0.010471	0	0.0144063	0	0	0
site_848	0.356194	0.114648	0.472659	0.0564983	0	0	0
site_849	0.290242	0.101824	0.482447	0.125487	0	0	0
site_850	0.286092	0.164873	0.324034	0.225001	0	0	0
site_851	0.346006	0.167034	0.323843	0.155601	0	0	0.00751622
site_852	0.989557	0.00715919	0	0.00328429	0	0	0
site_853	0.000550965	0.0759718	0.79339	0.129812	0.000275486	0	0
site_854	0.920375	0.0219159	0.000277505	0.0574312	0	0	0
site_855	0.00793341	0.0883335	0.857095	0.00307722	0	0.0402384	0.00332232
site_856	0.464099	0.393681	0.0111421	0.131078	0	0	0
site_857	0.502414	0.390926	0	0.10666	0	0	0
site_858	0.742448	0.249877	0	0.00767476	0	0	0
site_859	0.051369	0.078408	0.864734	0	0	0.00548932	0
site_860	0.207681	0.287809	0.503413	0.00109681	0	0	0
site_861	0.844817	0	0.155183	0	0	0	0
site_862	0.241465	0.293986	0.404723	0.0598268	0	0	0
site_863	0.500508	0.121426	0.372579	0.00548757	0	0	0
site_864	0.13724	0.338915	0.465469	0.058376	0	0	0
site_865	0.450415	0.449383	0.100202	0	0	0	0
site_866	0.27033	0.0800584	0.00055008	0.649062	0	0	0
site_867	0.0164449	0.0224748	0.96108	0	0	0	0
site_868	0.613441	0.225616	0	0.160943	0	0	0
site_869	0.351947	0.279908	0.176722	0.191423	0	0	0
site_870	0.159889	0.160885	0.657129	0.0220973	0	0	0
site_871	0.0242604	0.0376742	0.915799	0.0222663	0	0	0
site_872	0.0044115	0.0074381	0.985393	0.00275723	0	0	0
site_873	0.57304	0.121505	0.0878292	0.217626	0	0	0
site_874	0.212683	0.469338	0.296589	0	0	0.0019164	0.0194734
site_875	0.387945	0.262569	0.116064	0.233423	0	0	0
site_876	0.821985	0.0404441	0.137571	0	0	0	0
site_877	0.991408	0.00859228	0	0	0	0	0
site_878	0.0368738	0.651601	0.294957	0.0165685	0	0	0
site_879	0.0230197	0.0911072	0.690507	0.18465	0	0.0107163	0
site_880	0.457239	0.000276488	0.542485	0	0	0	0
site_881	0.961535	0.0195161	0	0.0189492	0	0	0
site_882	0.776129	0.0871297	0.136466	0.000274855	0	0	0
site_883	0.016376	0.000836782	0.982787	0	0	0	0
site_884	0.0431517	0.00606562	0.950783	0	0	0	0
site_885	0.623645	0.290779	0.0405208	0.0387437	0.00631166	0	0
site_886	0.406117	0.227062	0.0368666	0.312879	0.0140464	0.00110161	0.0019279
site_887	0	0	1	0	0	0	0
site_888	0.989214	0.00447917	0	0.00630689	0	0	0
site_889	0.303173	0.136921	0.364662	0.195245	0	0	0
site_890	0.388576	0.364061	0.124501	0.122862	0	0	0
site_891	0.313209	0.54778	0.11454	0	0	0.00384929	0.0206214
site_892	0.172418	0.172326	0.309238	0.346018	0	0	0
site_893	0.963346	0	0	0.0366541	0	0	0
site_894	0.286693	0.512514	0.113662	0.0871315	0	0	0
site_895	0.131782	0.296122	0.431496	0.1406	0	0	0
site_896	0.166827	0.13402	0.675465	0.0236882	0	0	0
site_897	0.54566	0.420275	0.0340649	0	0	0	0
site_898	0.852802	0.145553	0	0.00164532	0	0	0
site_899	0.689716	0.305562	0.00472268	0	0	0	0
site_900	0.735966	0.0267282	0	0.237306	0	0	0
site_901	0.656572	0.331129	0	0.0122991	0	0	0
site_902	0.935995	0.0298003	0	0.0342051	0	0	0
site_903	0.171678	0.112402	0.538446	0.177474	0	0	0
site_904	0.185129	0.15828	0.534213	0.122379	0	0	0
site_905	0.450893	0.0653255	0.482955	0.000826619	0	0	0
site_906	0.493002	0.00332213	0.503676	0	0	0	0
site_907	0.349044	0.599292	0.00681308	0.0448511	0	0	0
site_908	0.767845	0.228042	0	0.0041123	0	0	0
site_909	0.396918	0.0780458	0	0.525036	0	0	0
site_910	0.115515	0.357583	0.524091	0.00281105	0	0	0
site_911	0.00249097	0.135218	0.811544	0.0507468	0	0	0
site_912	0.0605622	0.0251201	0.914318	0	0	0	0
site_913	0.222323	0.375623	0.204985	0.197069	0	0	0
site_914	0.336555	0.0261946	0.629623	0.00762682	0	0	0
site_915	0	0.0102509	0.989749	0	0	0	0
site_916	0.262869	0.0705837	0.657794	0.00875382	0	0	0
site_917	0.180299	0.103364	0.00305276	0.711896	0.0013876	0	0
site_918	0.476468	0.0861365	0	0.427439	0.00995662	0	0
site_919	0.999726	0	0	0.000273792	0	0	0
site_920	0.453697	0.192979	0.320344	0.032979	0	0	0
site_921	0.126946	0.333008	0.540046	0	0	0	0
site_922	0.780037	0.188701	0	0.0312615	0	0	0
site_923	0.532101	0.33079	0.0635514	0.0735577	0	0	0
site_924	0.305985	0.278705	0.41531	0	0	0	0
site_925	0.204917	0.149217	0.645866	0	0	0	0
site_926	0.154247	0.641921	0.145252	0.0585805	0	0	0
site_927	0	0.0112754	0.988175	0.000550006	0	0	0
site_928	0.0248298	0.00671697	0.968173	0.000279874	0	0	0
site_929	0.321864	0.043598	0.00220707	0.630952	0.00137941	0	0
site_930	0.828102	0.158408	0.0134901	0	0	0	0
site_931	0.0140383	0.00425995	0.964248	0.0174535	0	0	0
site_932	0.438917	0.00703816	0.554045	0	0	0	0
site_933	0.215527	0.373484	0.0029146	0.38229	0.0257838	0	0
site_934	0.258761	0.0145742	0.625045	0.10162	0	0	0
site_935	0.0784772	0.0809048	0.840618	0	0	0	0
site_936	0.508268	0.0092176	0.482514	0	0	0	0
site_937	0.842796	0.0595742	0.0976293	0	0	0	0
site_938	0.965876	0.0306952	0	0.00342845	0	0	0
site_939	0.295316	0.232231	0.000265522	0.472187	0	0	0
site_940	0.00367982	0.0501134	0.946207	0	0	0	0
site_941	0.0277518	0.094523	0.871955	0.00576991	0	0	0
site_942	0.418842	0.441981	0.0185659	0.118923	0.00168725	0	0
site_943	0.0516824	0.193247	0.728814	0.0252043	0	0.00105208	0
site_944	0.41921	0.18782	0.00765018	0.385319	0	0	0
site_945	0.0180107	0.0495783	0.914251	0.0181603	0	0	0
site_946	0.0253279	0.0457468	0.924164	0.00476108	0	0	0
site_947	0.363331	0.0156265	0	0.621042	0	0	0
site_948	0.343121	0.0173806	0	0.0554577	0	0.584041	0
site_949	0.39041	0.135787	0.182407	0.290337	0	0.0010588	0
site_950	0.348157	0.0869427	0	0.564901	0	0	0
site_951	0.295276	0.271377	0.0182766	0.415071	0	0	0
site_952	0.270839	0.290212	0.0376958	0.401253	0	0	0
site_953	0.482545	0.0805601	0	0.192299	0.244596	0	0
site_954	0	0	1	0	0	0	0
site_955	0.521434	0.0683886	0	0.410177	0	0	0
site_956	0.412148	0.132374	0.0672144	0.388002	0.000261897	0	0
site_957	0.399423	0.0987426	0.501835	0	0	0	0
site_958	0.0119272	0.148548	0.793354	0.0461709	0	0	0
site_959	0.160178	0.0286274	0.811195	0	0	0	0
site_960	0.0508232	0	0.919936	0.029241	0	0	0
site_961	0.288386	0.152993	0.553238	0.00538343	0	0	0
site_962	0.145859	0.130416	0.680479	0.043246	0	0	0
site_963	0.244996	0.357821	0.00656027	0.381288	0.00854694	0.000787224	0
site_964	0.182959	0.0213755	0	0.792507	0.00315852	0	0
site_965	0.270308	0.436456	0.00909912	0.279728	0.00440922	0	0
site_966	0.712107	0.0629898	0.00818445	0.216719	0	0	0
site_967	0.779178	0.0270241	0.193798	0	0	0	0
site_968	0.18726	0.00156994	0.81117	0	0	0	0
site_969	0	0.00225605	0.974487	0.023257	0	0	0
site_970	0	0	1	0	0	0	0
site_971	0.0403311	0	0.949582	0.0100873	0	0	0
site_972	0.318897	0.0383882	0.603701	0.0387539	0	0.000260022	0
site_973	0.324568	0.123547	0.160761	0.391124	0	0	0
site_974	0.577435	0.129267	0.000263518	0.248765	0.000527047	0.0437433	0
site_975	0.137621	0.280524	0.00211347	0.572609	0	0.00713304	0
site_976	1	0	0	0	0	0	0
site_977	0.115138	0.0217898	0.863072	0	0	0	0
site_978	0.110265	0.25865	0.135009	0.496076	0	0	0
site_979	0.893337	0.0749543	0.0274545	0.00425389	0	0	0
site_980	0.220937	0.18581	0.287167	0.305825	0.000260408	0	0
site_981	0.251312	0.215481	0.526648	0.00655893	0	0	0
site_982	0	0.0277662	0.969317	0.00185952	0.00105682	0	0
site_983	0.145369	0.0433415	0.00208419	0.809205	0	0	0
site_984	0.267679	0.165111	0.00317718	0.564033	0	0	0
site_985	0.169065	0.215345	0.608576	0.00160491	0	0	0.00540797
site_986	0.0194711	0.0112832	0.966071	0.00317491	0	0	0
site_987	0	0.199306	0.767678	0.0330164	0	0	0
site_988	0.0227216	0.0374573	0.938327	0	0	0	0.00149452
site_989	0.082978	0.174746	0.71198	0.0302956	0	0	0
site_990	0.417217	0.159815	0	0.422967	0	0	0
site_991	0.23471	0.0114796	0	0.752755	0.00105556	0	0
site_992	0.328285	0.127761	0.0247482	0.519206	0	0	0
site_993	0.0725472	0.169888	0.756258	0.0013068	0	0	0
site_994	0.543142	0.201637	0.237734	0.0133282	0	0.00415854	0
site_995	0.0334536	0.0444636	0.911882	0.00993887	0	0.000261543	0
site_996	0.762154	0.154149	0.000262335	0.0327905	0	0	0.0506447
site_997	0.474961	0.225061	0.000261583	0.299192	0	0.00052318	0
site_998	0.110846	0.0343482	0.716216	0.137285	0	0.00130481	0
site_999	0.0348317	0.00314271	0.962004	2.16048e-05	0	0	0
site_1000	0.654923	0.0348084	0.119332	0.190936	0	0	0
site_1001	0.458856	0.062833	0.478311	0	0	0	0
site_1002	0.0699815	0.276924	0.582635	0.0704593	0	0	0
site_1003	0.0930342	0.017305	0.873432	0.0162286	0	0	0
site_1004	0.000276445	0.018857	0.980867	0	0	0	0
site_1005	0.0726338	0.238519	0.671649	0.0171977	0	0	0
site_1006	0.0126307	0.0219215	0.956174	0.0092742	0	0	0
site_1007	0.010536	0.0297552	0.959709	0	0	0	0
site_1008	0.00770999	0.0220847	0.970205	0	0	0	0
site_1009	0.992522	0.00713137	0	0.000346698	0	0	0
site_1010	0.281677	0.286116	0.0639148	0.368292	0	0	0
site_1011	0.464618	0.0393053	0	0.496077	0	0	0
site_1012	0.912617	0.0405439	0	0.0468394	0	0	0
site_1013	0.501278	0.155125	0.0104697	0.333127	0	0	0
site_1014	0.819086	0.180914	0	0	0	0	0
site_1015	0.0464926	0.0205071	0.933	0	0	0	0
site_1016	0.692597	0.0316461	0.0743816	0.20059	0.00078466	0	0
site_1017	0.00862094	0.00425977	0.987119	0	0	0	0
site_1018	0.939321	0.0464542	0	0.014225	0	0	0
site_1019	0.934511	0.00294485	0	0.0621964	0.000347635	0	0
site_1020	0.00586441	0.0143174	0.952164	0.0276544	0	0	0
site_1021	0.293211	0.0609509	0.617846	0.0279921	0	0	0
site_1022	0.356109	0.128088	0.291032	0.224508	0	0.000262766	0
site_1023	0.985229	0.00899468	0	0.00577664	0	0	0
site_1024	0	0.100703	0.837569	0.0617284	0	0	0
site_1025	0.0677125	0.245326	0.50167	0.185292	0	0	0
site_1026	0.743166	0.187446	0.00105329	0.0683343	0	0	0
site_1027	0.0340217	0.189744	0.766551	0	0	0	0.0096834
site_1028	0.0242416	0.0116398	0.963548	0.000570377	0	0	0
site_1029	0.975292	0.0247077	0	0	0	0	0
site_1030	0.766492	0.170347	0	0.0631616	0	0	0
site_1031	0	0.00340933	0.996591	0	0	0	0
site_1032	0	0.0072928	0.992707	0	0	0	0
site_1033	0.955525	0	0	0.0444755	0	0	0
site_1034	0.130387	0.0563146	0.482076	0	0	0.327773	0.00344805
site_1035	0.0621413	0.0724638	0.809425	0.0559695	0	0	0
site_1036	0.0438485	0.276654	0.00683316	0.671612	0.00105262	0	0
site_1037	0.459751	0.302503	0.00343322	0.233785	0.000528199	0	0
site_1038	0.360497	0.170816	0.106013	0.35105	0.0116245	0	0
site_1039	0.123524	0.167265	0.702107	0.00710409	0	0	0
site_1040	0.908869	0.00368447	0	0.0874469	0	0	0
site_1041	0.910696	0.0383248	0	0.0509795	0	0	0
site_1042	0.407835	0.559924	0.0026012	0.0296395	0	0	0
site_1043	0.0440828	0.0704604	0.87108	0.00771036	0	0	0.00666678
site_1044	0.253535	0.0377887	0.00133045	0.69617	0.0111757	0	0
site_1045	0.964114	0.0358858	0	0	0	0	0
site_1046	0.0326275	0.0966514	0.694157	0.171689	0.00487472	0	0
site_1047	0.836655	0.0406385	0.122706	0	0	0	0
site_1048	0.00637647	0.0316884	0.955577	0.0063578	0	0	0
site_1049	0.310051	0.149058	0.414666	0.126225	0	0	0
site_1050	0.282988	0.0786152	0.590838	0.00837896	0	0.0391802	0
site_1051	0.00106002	0.159924	0.804192	0.0334996	0.00132498	0	0
site_1052	0.105312	0.368385	0.513847	0.00109728	0.0113592	0	0
site_1053	0.203847	0.314781	0.284168	0.196944	0	0	0.000261054
site_1054	0.201681	0.26865	0.333007	0.19587	0	0.000793149	0
site_1055	0.0531952	0.475738	0.0576834	0.412078	0.0013053	0	0
site_1056	0.279023	0.108947	0.61203	0	0	0	0
site_1057	0.0414505	0.00360005	0.944357	0.0105921	0	0	0
site_1058	0.947339	0.052142	0	0.000519058	0	0	0
site_1059	0.0152729	0.0845301	0.900154	4.35176e-05	0	0	0
site_1060	0.902165	0.0931096	0.00472523	0	0	0	0
site_1061	0.558583	0.160479	0.258007	0.0229317	0	0	0
site_1062	0.420024	0.226984	0.0476273	0.257568	0.0477966	0	0
site_1063	0	0.00131372	0.996847	0	0.00183922	0	0
site_1064	0.824005	0	0	0	0	0.175995	0
site_1065	0.982809	0.0100945	0	0.00709671	0	0	0
site_1066	0.82421	0.166824	0.00516524	0.00197819	0.00182247	0	0
site_1067	0.555718	0.276059	0.000265889	0.167957	0	0	0
site_1068	0.886466	0.112751	0	0.000782243	0	0	0
site_1069	0.430382	0.107608	0.46201	0	0	0	0
site_1070	0.603127	0.267766	0.000526845	0.124442	0.00413848	0	0
site_1071	0.0787799	0.189478	0.671348	0.0561936	0.00420043	0	0
site_1072	0.208059	0.527944	0.0272832	0.231694	0	0.00502101	0
site_1073	0.0532056	0.0593682	0.874221	0.013205	0	0	0
site_1074	0.249406	0.264583	0.470973	0.0150386	0	0	0
site_1075	0.153379	0.125274	0.486685	0.234662	0	0	0
site_1076	0.447938	0.0829318	0.40718	0.06182	0	0.000129882	0
site_1077	0.110457	0.0316376	0.857905	0	0	0	0
site_1078	0.761947	0.133419	0	0.104634	0	0	0
site_1079	0.181439	0.10106	0.505696	0.211805	0	0	0
site_1080	0.204972	0.227367	0.0625806	0.50508	0	0	0
site_1081	0.0941978	0.0825517	0.803846	0.0194045	0	0	0
site_1082	0.14182	0.034877	0.823303	0	0	0	0
site_1083	0.366844	0.180045	0.399738	0.0533727	0	0	0
site_1084	0.00631751	0.0367494	0.918999	0.0379337	0	0	0
site_1085	0.823877	0.149165	0	0.0266969	0	0	0.000260621
site_1086	0.10489	0.0591782	0.763733	0.0721988	0	0	0
site_1087	0.0396783	0.135388	0.81705	0.00788384	0	0	0
site_1088	0.847782	0.0549286	0.000265939	0.0970239	0	0	0
site_1089	0.0808136	0.120721	0.773867	0.0245982	0	0	0
site_1090	0.0665971	0.00431446	0.929088	0	0	0	0
site_1091	0.298141	0.0607086	0.62781	0.0133402	0	0	0
site_1092	0	0.0420394	0.957961	0	0	0	0
site_1093	0.276598	0.429345	0.117779	0.132626	0.043652	0	0
site_1094	0.737866	0.229206	0.0329281	0	0	0	0
site_1095	0.763688	0.232901	0	0.00341146	0	0	0
site_1096	0.206579	0.0397232	0.00523229	0.748466	0	0	0
site_1097	0.0503715	0.081746	0.867883	0	0	0	0
site_1098	0.0136453	0.021986	0.964369	0	0	0	0
site_1099	0.6755	0.0163357	0.267829	0.0403357	0	0	0
site_1100	0.265299	0.0739002	0.65116	0.00964108	0	0	0
site_1101	0.268078	0.638003	0.0921743	0.00174485	0	0	0
site_1102	0.586438	0.262076	0.0476242	0.101645	0.00221676	0	0
site_1103	0.760536	0.214408	0.010593	0.0144631	0	0	0
site_1104	0.428369	0.197144	0.0109574	0.359784	0	0.00347796	0.000267536
site_1105	0.972025	0	0	0.0279749	0	0	0
site_1106	0.0206098	0.0271628	0.952227	0	0	0	0
site_1107	0.0959788	0.348767	0.34938	0.205874	0	0	0
site_1108	0.896688	0.0717953	0.0315168	0	0	0	0
site_1109	0.0832068	0.0345702	0.713259	0.168963	0	0	0
site_1110	0.824819	0.138062	0.000527781	0.0365912	0	0	0
site_1111	0.249053	0.150796	0.439281	0.155619	0	0.00498815	0.000262203
site_1112	0.583907	0.314284	0.0121625	0.0894823	0.000164331	0	0
site_1113	0.0704716	0.0739784	0.85555	0	0	0	0
site_1114	0.0219914	0.134464	0.810193	0.0333517	0	0	0
site_1115	0.036655	0.0766011	0.823773	0.0629714	0	0	0
site_1116	0.0190625	0.0863203	0.858394	0.0333286	0	0	0.00289431
site_1117	0.11877	0.338331	0.390805	0.0975978	0	0.0457414	0.0087554
site_1118	0.196286	0.798256	0	0.00545813	0	0	0
site_1119	0.00182327	0	0.998177	0	0	0	0
site_1120	0.0414893	0.036073	0.920995	0.00144271	0	0	0
site_1121	0.00394494	0.102172	0.803562	0.0803276	0.00999357	0	0
site_1122	0.180953	0.139919	0.487426	0.191701	0	0	0
site_1123	0.0917908	0.106178	0.228212	0.573819	0	0	0
site_1124	0.0144873	0.371889	0.613624	0	0	0	0
site_1125	0	0	1	0	0	0	0
site_1126	0.457197	0.217318	0.241127	0.0843574	0	0	0
site_1127	0.579605	0.0378844	0.382511	0	0	0	0
site_1128	0.00250657	0.0320958	0.941897	0.0235007	0	0	0
site_1129	0.977095	0.0226407	0	0.000263846	0	0	0
site_1130	0.651516	0.0600285	0.288195	0	0	0	0.000260743
site_1131	0.230415	0.402333	0.0504018	0.31685	0	0	0
site_1132	0.0723278	0.152759	0.684999	0.0899148	0	0	0
site_1133	0.98525	0.0125355	0	0.00221437	0	0	0
site_1134	0.165386	0.355132	0.164302	0.31518	0	0	0
site_1135	0.850536	0.123657	0	0.0258077	0	0	0
site_1136	0.309603	0.289039	0.267494	0.121756	0.000315488	0.00786702	0.00392516
site_1137	0.259606	0.690399	0.00394692	0.0452583	0.000263125	0	0.000526284
site_1138	0.105145	0.01248	0.882375	0	0	0	0
site_1139	0.258208	0.100935	0.162042	0.470367	0.00844771	0	0
site_1140	0.840815	0.123505	0	0.03568	0	0	0
site_1141	0.913235	0.084937	0	0.00182751	0	0	0
site_1142	0.345606	0.429112	0.21368	0.0116019	0	0	0
site_1143	0.146319	0.0506965	0.731163	0.0219452	0	0.0498755	0
site_1144	0.0075187	0.1593	0.75991	0.0592167	0.0140542	0	0
site_1145	0.683694	0.179537	0.00026582	0.136504	0	0	0
site_1146	0.66568	0.247644	0.05598	0.0290165	0.00167889	0	0
site_1147	0.444475	0.325703	0.139731	0.0900912	0	0	0
site_1148	0.179741	0.215989	0.533874	0.0703965	0	0	0
site_1149	0.263432	0.260564	0.411502	0.0645027	0	0	0
site_1150	0.0275286	0.0569546	0.874094	0.0414229	0	0	0
site_1151	0.149341	0.167945	0.298234	0.384479	0	0	0
site_1152	4.4092e-07	0	1	0	0	0	0
site_1153	0.639321	0.163673	0.00388478	0.193121	0	0	0
site_1154	0.996695	0.00200229	0	0.00130278	0	0	0
site_1155	0.132283	0.456134	0.0454347	0.366148	0	0	0
site_1156	0.326319	0.331617	0.209617	0.132447	0	0	0
site_1157	0.0103969	0.000416534	0.983558	0.00562882	0	0	0
site_1158	0.94765	0.0523496	0	0	0	0	0
site_1159	0.361319	0.189221	0.000403431	0.449057	0	0	0
site_1160	0.666535	0.324564	0.00890127	0	0	0	0
site_1161	0.202619	0.212839	0.00597268	0.57857	0	0	0
site_1162	0	0.00408783	0.970116	0.0257962	0	0	0
site_1163	0.00453936	0.112873	0.835195	0.047392	0	0	0
site_1164	0.387825	0.12453	0.421947	0.0650761	0	0.000622197	0
site_1165	0.866384	0.091537	0	0.0420786	0	0	0
site_1166	0.0415515	0.25341	0.698846	0.00619291	0	0	0
site_1167	0.0010551	0.0734147	0.0917565	0.825289	0.00848495	0	0
site_1168	0.000792293	0.0729242	0.92042	0.00322202	0	0	0.00264105
site_1169	0.744288	0.227094	0.0286173	0	0	0	0
site_1170	0.16599	0.0302825	0.783985	0.0197423	0	0	0
site_1171	0.837878	0	0	0	0	0.162122	0
site_1172	0.508803	0.0924314	0.0115904	0.35056	0.0366154	0	0
site_1173	0	0.0101417	0.988524	0.0013345	0	0	0
site_1174	0.00785229	0.243956	0.681017	0.0671743	0	0	0
site_1175	0.60553	0.26528	0.0967042	0.032486	0	0	0
site_1176	0.388938	0.208764	0.380919	0.0213789	0	0	0
site_1177	0.984783	0.00641516	0	0.00880186	0	0	0
site_1178	0.933007	0.0667123	0	0.00028074	0	0	0
site_1179	0.0755409	0.133531	0.614359	0.176015	0.000554513	0	0
site_1180	0.0236899	0.143125	0.796851	0.0363339	0	0	0
site_1181	0.00584479	0.000278324	0.976493	0.017384	0	0	0
site_1182	0.165043	0.164272	0.289317	0.370267	0.0111013	0	0
site_1183	0.132251	0.0984015	0.713272	0.0560756	0	0	0
site_1184	0.0501424	0.246596	0.629389	0.0738729	0	0	0
site_1185	0.000811478	0.23265	0.766385	0.000152901	0	0	0
site_1186	0.493365	0.112424	0.00541089	0.375166	0.0136343	0	0
site_1187	0.0371115	0.159834	0.79544	0.00761446	0	0	0
site_1188	0.125125	0.0428206	0.00219983	0.829855	0	0	0
site_1189	0.396099	0.362124	0.0344873	0.0964548	0	0.110836	0
site_1190	0.273106	0.181105	0.0272903	0.511486	0.00701285	0	0
site_1191	0.120875	0.133523	0.684966	0.0606359	0	0	0
site_1192	0.351118	0.393847	0.0550334	0.199455	0	0.000547149	0
site_1193	0.153804	0.119679	0.511213	0.215305	0	0	0
site_1194	0.263806	0.373626	0.288556	0.0740118	0	0	0
site_1195	0.368143	0.131452	0.000540535	0.498509	0.00135539	0	0
site_1196	0.165673	0.197682	0.321885	0.31476	0	0	0
site_1197	0.455174	0.224415	0.0238602	0.296551	0	0	0
site_1198	0.38788	0.259303	0.340687	0	0	0.000275701	0.0118551
site_1199	1	0	0	0	0	0	0
site_1200	0.459697	0.31503	0.161572	0.063701	0	0	0
site_1201	0.338497	0.322533	0.274493	0.0644772	0	0	0
site_1202	0.145198	0.232211	0.59854	0.0240507	0	0	0
site_1203	0.996999	0	0	0.00300083	0	0	0
site_1204	0.664602	0.209355	0.00393988	0.122103	0	0	0
site_1205	0.689014	0.0952063	0.215779	0	0	0	0
site_1206	0.0658524	0	0	0.933275	0.000873114	0	0
site_1207	0.256347	0.536166	0.178766	0.0287217	0	0	0
site_1208	0.509056	0.269672	0.131023	0.0902488	0	0	0
site_1209	0.970288	0.0297124	0	0	0	0	0
site_1210	0.52943	0.0622621	0.408307	0	0	0	0
site_1211	0.113944	0.0041172	0.881939	0	0	0	0
site_1212	0.910491	0.0895089	0	0	0	0	0
site_1213	0.901813	0.0327684	0.0417971	0.0236216	0	0	0
site_1214	0.628016	0.086994	0.211967	0.0730227	0	0	0
site_1215	0.0899742	0.140257	0.534709	0.234499	0.000559982	0	0
site_1216	0.166842	0.336803	0.496077	0.00027809	0	0	0
site_1217	0.233625	0.196917	0.442205	0.127253	0	0	0
site_1218	0.00415956	0.00139145	0.984391	0.0100582	0	0	0
site_1219	0.0283371	0.16969	0.732933	0.0690399	0	0	0
site_1220	0.0388735	0.123123	0.775125	0.062878	0	0	0
site_1221	0.229467	0.237611	0.0913609	0.438042	0.00351844	0	0
site_1222	0.498729	0.0825398	0.286038	0.132694	0	0	0
site_1223	0.369085	0.381237	0.128079	0.121599	0	0	0
site_1224	0.317275	0.0993317	0.572401	0.0109919	0	0	0
site_1225	0.662766	0.226961	0.0491512	0.0611219	0	0	0
site_1226	0.341977	0.328443	0.226075	0.0988763	0.00408041	0.00054885	0
site_1227	0.00558773	0.0197605	0.927172	0.0474795	0	0	0
site_1228	0.14021	0.433935	0.374019	0.0518362	0	0	0
site_1229	0.408044	0.0614541	0.00837225	0.521851	0.000279065	0	0
site_1230	0.362906	0.225247	0.00937294	0.402474	0	0	0
site_1231	0.277045	0.0883475	0.544771	0.089837	0	0	0
site_1232	0.597942	0.219086	0	0.182972	0	0	0
site_1233	0.176975	0.223115	0.501259	0.0986512	0	0	0
site_1234	0.0962975	0.218534	0.586033	0.0991354	0	0	0
site_1235	0.246765	0.132895	0.048039	0.572124	0.000177671	0	0
site_1236	0.126302	0.0817012	0.00575146	0.785693	0.000551602	0	0
site_1237	0.443148	0.193269	0.0878889	0.275694	0	0	0
site_1238	0.301231	0.0434197	0.652834	0.00251607	0	0	0
site_1239	0.00804993	0.0579082	0.397817	0.534834	0.00139036	0	0
site_1240	0.175956	0.0022093	0.81493	0.00690408	0	0	0
site_1241	0.546268	0.129287	0.287857	0.0365875	0	0	0
site_1242	0.868122	0.0376627	0.0665053	0.0277102	0	0	0
site_1243	0.108727	0.253843	0.175348	0.460718	0.00136455	0	0
site_1244	0.150663	0.0252585	0.378725	0.445354	0	0	0
site_1245	0.352885	0.0695456	0.576466	0.000551572	0	0	0.000551578
site_1246	0.849858	0.0961035	0.00632001	0.0477184	0	0	0
site_1247	0.0801127	0.246347	0.67354	0	0	0	0
site_1248	0.78441	0.0317232	0.169935	0.0139317	0	0	0
site_1249	0.586146	0.378904	0.00985154	0.025098	0	0	0
site_1250	0.347027	0.0790108	0	0.573687	0.000275075	0	0
site_1251	0	0.000277756	0.999722	0	0	0	0
site_1252	0.671144	0.0546294	0.254118	0.00196696	0	0.0181415	0
site_1253	0.111981	0.294464	0.131241	0.462034	0.000279571	0	0
site_1254	0.386889	0.366457	0.186485	0.0601687	0	0	0
site_1255	0.195077	0.0652709	0.316328	0.396441	0.0268829	0	0
site_1256	0.126538	0.152054	0.16669	0.553906	0.000811861	0	0
site_1257	0.713784	0.20764	0.000273268	0.0783025	0	0	0
site_1258	0.308661	0.25775	0.418997	0.0145914	0	0	0
site_1259	0.473828	0.147845	0.0293397	0.348988	0	0	0
site_1260	0.608065	0.0478911	0.327196	0.0168478	0	0	0
site_1261	0.0494788	0.0844018	0.820051	0.0460686	0	0	0
site_1262	0.241737	0.141744	0.0689433	0.547576	0	0	0
site_1263	0.16344	0.191882	0.478866	0.165537	0.000274635	0	0
site_1264	1	0	0	0	0	0	0
site_1265	0.984788	0.0151005	0	0.000111884	0	0	0
site_1266	0.284041	0.119374	0.00642219	0.589896	0.00026658	0	0
site_1267	0.132124	0.0556711	0.788045	0.02416	0	0	0
site_1268	0.0722041	0.0200349	0.806354	0.101407	0	0	0
site_1269	0.875088	0.0682274	0.0414364	0.0152479	0	0	0
site_1270	0.930704	0.0203907	0	0.048905	0	0	0
site_1271	0.0196094	0.0788332	0.804925	0.0966329	0	0	0
site_1272	0.988626	0	0	0.011374	0	0	0
site_1273	0.777564	0.0926174	0.0636327	0.0661858	0	0	0
site_1274	0.610775	0.16104	0.226537	0.00164819	0	0	0
site_1275	0.140844	0.0471811	0.811975	0	0	0	0
site_1276	0.376667	0.304609	0.0535935	0.26476	9.57295e-05	0	0.000274887
site_1277	0.0829486	0.29919	0.617861	0	0	0	0
site_1278	0.268525	0.271845	0.00721929	0.45213	0.000280304	0	0
site_1279	0.283418	0.0474631	0.00526074	0.663586	0.000272785	0	0
site_1280	0.518696	0.18792	0.21142	0.0819633	0	0	0
site_1281	0.274363	0.117774	0.60008	0.00778314	0	0	0
site_1282	0.281578	0.220319	0.299985	0.198117	0	0	0
site_1283	0.00702295	0.0358127	0.954156	0.00300877	0	0	0
site_1284	0.537805	0.0264	0.358468	0.0609093	0.0164173	0	0
site_1285	0.410978	0.396134	0.117427	0.0754612	0	0	0
site_1286	0.185194	0.426278	0.339022	0.0483966	0	0	0.0011094
site_1287	0.343281	0.071342	0.0024559	0.409447	0.000272645	0.173202	0
site_1288	0.347273	0.323117	0.225137	0.0786193	0	0	0.0258532
site_1289	0.35875	0.234499	0.223457	0.183295	0	0	0
site_1290	0.0887599	0.0335761	0.859808	0.0178558	0	0	0
site_1291	0.640645	0.0336879	0.000553036	0.325114	0	0	0
site_1292	0.292844	0.148581	0.548523	0.010052	0	0	0
site_1293	0.810405	0.149355	0	0.0402402	0	0	0
site_1294	0.950107	0.0487766	0	0.00111645	0	0	0
site_1295	0.000278298	0.0071041	0.992618	0	0	0	0
site_1296	0.208562	0.440369	0.24704	0.104029	0	0	0
site_1297	0.634475	0.0359937	0.295261	0.0342702	0	0	0
site_1298	0	0.0231611	0.921384	0.0554546	0	0	0
site_1299	0.0148818	0.122981	0.820829	0.0413085	0	0	0
site_1300	0.0539702	0.422134	0.49123	0.0326655	0	0	0
site_1301	0.0883207	0.100785	0.787523	0.0233714	0	0	0
site_1302	0.566739	0.222065	0.211196	0	0	0	0
site_1303	0.69027	0.107194	0	0.202536	0	0	0
site_1304	0.266515	0.299258	0.175755	0.251508	0.00696424	0	0
site_1305	0.0242341	0.376089	0.398319	0.201359	0	0	0
site_1306	0.891712	0.108288	0	0	0	0	0
site_1307	0.338996	0.14944	0.093759	0.417805	0	0	0
site_1308	0.294855	0.250729	0.0941446	0.360272	0	0	0
site_1309	0.875548	0.00869417	0	0.115758	0	0	0
site_1310	0.999721	0.000279079	0	0	0	0	0
site_1311	0.999721	0.000279203	0	0	0	0	0
site_1312	0.134131	0.0793811	0.746938	0.0395501	0	0	0
site_1313	0.113565	0.0146937	0.870916	0.0008256	0	0	0
site_1314	0.0922191	0.345448	0.460813	0.0785896	0	0	0.0229306
site_1315	0.256464	0.300607	0.342263	0.100666	0	0	0
site_1316	0.984386	0.000473141	0.0129347	0.0022058	0	0	0
site_1317	0.0896283	0.224802	0.577484	0.10781	0.000276535	0	0
site_1318	0.52139	0.381616	0.0928513	0.00414188	0	0	0
site_1319	0.833507	0.166219	0	0.00027386	0	0	0
site_1320	0.836342	0.128466	0.0351919	0	0	0	0
site_1321	0.269547	0.242936	0.401757	0.0857599	0	0	0
site_1322	0.032875	0.0219791	0.937801	0.00734511	0	0	0
site_1323	0.103023	0.477994	0.34901	0.0699727	0	0	0
site_1324	0.0883056	0.12626	0.777287	0.00814763	0	0	0
site_1325	0.398246	0.136126	0.464527	0	0	0	0.00110191
site_1326	0.163643	0.165392	0.0556986	0.615266	0	0	0
site_1327	0.605862	0.385664	0.0084738	0	0	0	0
site_1328	0.957199	0.00829922	7.65341e-05	0.0344251	0	0	0
site_1329	0.131444	0.0442444	0.738806	0.0855056	0	0	0
site_1330	0.0482392	0.073935	0.84412	0.0337056	0	0	0
site_1331	0.199016	0.0465137	0.701315	0.0531553	0	0	0
site_1332	0.682506	0.251056	0.0248303	0.041608	0	0	0
site_1333	0.0373144	0.124541	0.752778	0.0853662	0	0	0
site_1334	0.409889	0.3095	0.245312	0.033663	0	0	0.00163695
site_1335	0.788649	0.0266001	0.132351	0.0523969	0	0	3.24466e-06
site_1336	0.979817	0.019899	0.000283679	0	0	0	0
site_1337	0.164378	0.496387	0.292769	0.0453753	0.00109037	0	0
site_1338	0.049782	0.0600112	0.854865	0.0353415	0	0	0
site_1339	0.865932	0.0537268	0.0633108	0.0170309	0	0	0
site_1340	0.240831	0.348754	0	0.410415	0	0	0
site_1341	0	0.019741	0.980259	0	0	0	0
site_1342	0.719731	0.235213	0	0.0450552	0	0	0
site_1343	0.100367	0.427405	0.431819	0.0404092	0	0	0
site_1344	0.947637	0.0172431	0	0.0351199	0	0	0
site_1345	0.410638	0.117013	0.369249	0.0973246	0.00577659	0	0
site_1346	0.418337	0.416177	0.0298379	0.135648	0	0	0
site_1347	0.0526696	0.142159	0.792606	0.0125661	0	0	0
site_1348	0.628788	0.0419503	0.297106	0.0321558	0	0	0
site_1349	0.0016268	0.00813408	0.989536	0.000703146	0	0	0
site_1350	0.49671	0.134831	0.261982	0.0968257	0	0.0040645	0.00558768
site_1351	0.0390333	0.0161969	0.882453	0.0623168	0	0	0
site_1352	0.211343	0.0621229	0.656492	0.0700416	0	0	0
site_1353	0.268363	0.557279	0.0206242	0.153557	0	0	0.000176418
site_1354	0.0332688	0.171746	0.782696	0.0120118	0.000277146	0	0
site_1355	0.339096	0.28736	0.350107	0.0166371	0	0.000916044	0.00588427
site_1356	0.0227035	0.0417864	0.922564	0.0129463	0	0	0
site_1357	0.171156	0.145702	0.648581	0.0345615	0	0	0
site_1358	0.930151	0.00244138	0	0.067408	0	0	0
site_1359	0.784345	0.121986	0.0310767	0.0625916	0	0	0
site_1360	0.378041	0.531758	0.046418	0.0437838	0	0	0
site_1361	0.0604717	0.259411	0.649639	0.0304776	0	0	0
site_1362	0.289486	0.178553	0.085943	0.446018	0	0	0
site_1363	0.00194799	0.0827895	0.872176	0.0430862	0	0	0
site_1364	0.0195063	0.164605	0.75512	0.0607691	0	0	0
site_1365	0.000797956	0.188546	0.803871	0.0067847	0	0	0
site_1366	0.22183	0.697269	0.000264932	0.0660646	0.00927264	0	0.0052988
site_1367	0.0761237	0.0454655	0.866113	0.0120306	0	0	0.000267348
site_1368	0.0984126	0.16731	0.725471	0.0088058	0	0	0
site_1369	0.134382	0.286668	0	0.578949	0	0	0
site_1370	0.60361	0.0960784	0.256884	0.0434271	0	0	0
site_1371	0.379169	0.604697	0	0.0161342	0	0	0
site_1372	0.627989	0.285864	0	0.0465799	0	0.0395662	0
site_1373	0.0663966	0.647283	0.00556638	0.274199	0.00628845	0.000266423	0
site_1374	0.134017	0.400211	0.0180546	0.447717	0	0	0
site_1375	0.430996	0.340041	0.152453	0.00683918	0	0.06885	0.000820691
site_1376	0.918832	0.0507664	0.0295951	0.000806276	0	0	0
site_1377	0.286432	0.0793977	0	0.62253	0.0116411	0	0
site_1378	0.506726	0.122825	0.359337	0.0111121	0	0	0
site_1379	0.00502189	0.075944	0.910901	0.00162669	0	0.00650642	0
site_1380	0.168686	0.315639	0.475724	0.0399515	0	0	0
site_1381	0.984909	0.0140134	0	0.00107792	0	0	0
site_1382	0.36492	0.277336	0.152386	0.205359	0	0	0
site_1383	0.179831	0.00736232	0	0.811989	0.000818062	0	0
site_1384	0.0695282	0.534875	0.38016	0.0154367	0	0	0
site_1385	0.17091	0.0945682	0.725461	0.00906091	0	0	0
site_1386	0.623565	0.109346	0.262999	0.000545321	0	0.00354469	0
site_1387	0.400126	0.291861	0	0.284148	0	0.0238652	0
site_1388	0.0631362	0.336547	0.536765	0.0635526	0	0	0
site_1389	0.712723	0.14734	0	0.000753381	0	0.0343514	0.104833
site_1390	0.165538	0.563685	0.24541	0.0253668	0	0	0
site_1391	0.85515	0.0882944	0	0.0433197	0	0.0104896	0.00274588
site_1392	0.934294	0.0428998	0	0.0228067	0	0	0
site_1393	0.873337	0.088976	0	0.0376872	0	0	0
site_1394	0.000519347	0.0555053	0.943975	0	0	0	0
site_1395	0.378582	0.0994644	0	0.521954	0	0	0
site_1396	0.542311	0.32852	0	0.0543252	0.000259864	0.070375	0.00420879
site_1397	0.166697	0.377497	0.422688	0.0331175	0	0	0
site_1398	0.350077	0.224151	0.285068	0.139905	0.000798155	0	0
site_1399	0.136033	0.151679	0.453876	0.258412	0	0	0
site_1400	0.952023	0.0428983	0	0.00507864	0	0	0
site_1401	0.685349	0.0843505	0.178568	0.0517325	0	0	0
site_1402	0.464569	0.314384	0.00507574	0.181998	0	0.0318136	0.00215918
site_1403	0.24965	0.225135	0.438366	0.0868486	0	0	0
site_1404	0.921498	0.0734524	0	0.00504955	0	0	0
site_1405	0.772736	0.1834	0	0.0306474	0	0.0132157	0
site_1406	0.49697	0.217383	0.285646	0	0	0	0
site_1407	0.493863	0.506137	0	0	0	0	0
site_1408	0.162726	0.474778	0.000819298	0.352459	0.0092166	0	0
site_1409	0.20349	0.316094	0.00236438	0.478051	0	0	0
site_1410	0.675759	0.224522	0.0832442	0.0164752	0	0	0
site_1411	0.386745	0.0662789	0.460328	0.0847056	0.00194318	0	0
site_1412	0.73463	0.217741	0.0200341	0	0	0.0275947	0
site_1413	0.150901	0.757385	0.0521467	0.0395671	0	0	0
site_1414	0.968655	0.0137096	0	0.0176357	0	0	0
site_1415	0.307175	0.171065	0.0126867	0.505846	0.00322662	0	0
site_1416	0.899161	0.0730602	0.0275061	0.00027257	0	0	0
site_1417	0.0440544	0.0694375	0.867497	0.0190109	0	0	0
site_1418	0.379391	0.373689	0.209527	0.0373925	0	0	0
site_1419	0.624573	0.0501998	0	0.320876	0	0.00435165	0
site_1420	0.0932374	0.699684	0.207078	0	0	0	0
site_1421	0	0.0185336	0.981466	0	0	0	0
site_1422	0.365178	0.26404	0.0336962	0.337086	0	0	0
site_1423	0.0711952	0.061802	0.838284	0.0287192	0	0	0
site_1424	0.160649	0.515776	0.187128	0.135899	0	0	0.000547805
site_1425	0.877105	0.0256515	0.0599822	0.0372614	0	0	0
site_1426	0.477089	0.156665	0.362258	0.00398722	0	0	0
site_1427	0	0.999733	0	0	0	0	0.000266542
site_1428	0.807446	0.0844299	0	0.000879694	0	0.0717644	0.03548
site_1429	0.67512	0.154728	0.170152	0	0	0	0
site_1430	0.149142	0.42242	0.313128	0.115309	0	0	0
site_1431	0.986518	0	0	0.0124047	0	0.00107679	0
site_1432	0.438765	0.133522	0.00434476	0.423369	0	0	0
site_1433	0.116768	0.508976	0.323967	0.0502895	0	0	0
site_1434	0.266005	0.229446	0.0491435	0.455406	0	0	0
site_1435	0.0669822	0.387549	0.308398	0.237071	0	0	0
site_1436	0.449365	0.222727	0.327908	0	0	0	0
site_1437	0.532861	0.0840794	0.365065	0.0179947	0	0	0
site_1438	0.203458	0.0923916	0.697964	0.00618673	0	0	0
site_1439	0.32517	0.286004	0.0154598	0.369106	0.00426018	0	0
site_1440	0.903078	0.0690492	0	0.0278729	0	0	0
site_1441	0.344898	0.0602145	0	0.594348	0.000539682	0	0
site_1442	0.0145725	0.106864	0.878564	0	0	0	0
site_1443	0.544386	0.417873	0.0377409	0	0	0	0
site_1444	0.454487	0.17814	0.330181	0.0371919	0	0	0
site_1445	0.96636	0.0167875	0	0	0	0	0.0168527
site_1446	0.866701	0.0964767	0.0130435	0.0237793	0	0	0
site_1447	0.249981	0.308369	1.83153e-05	0.359663	0.00360249	0.0783661	0
site_1448	0.285873	0.397159	0.000266362	0.316702	0	0	0
site_1449	0	0.00303211	0.996968	0	0	0	0
site_1450	0.0916398	0.12951	0.761022	0.0178283	0	0	0
site_1451	0.09273	0.111844	0.789171	0.0062553	0	0	0
site_1452	0.945696	0.0436134	0	0.0106909	0	0	0
site_1453	0.00674296	0.0342466	0.95901	0	0	0	0
site_1454	0.0207625	0.152049	0.805852	0.0213367	0	0	0
site_1455	0.166672	0.0125914	0	0.820736	0	0	0
site_1456	0.247692	0.446618	0.0677635	0.237926	0	0	0
site_1457	0.948617	0.0354521	0	0.0159305	0	0	0
site_1458	0.983516	0.0164836	0	0	0	0	0
site_1459	0.5356	0.0162724	0.44578	0.002347	0	0	0
site_1460	0.933355	0.0451344	0	0.01259	0	0.00892092	0
site_1461	0.769869	0.220924	0	0.00920716	0	0	0
site_1462	0.139115	0.0662986	0	0.794586	0	0	0
site_1463	0.943998	0.0300658	0	0.0245465	0	0.00138956	0
site_1464	0.610198	0.254663	0.134824	0.000314053	0	0	0
site_1465	0.10911	0.141709	0.724086	0.0250951	0	0	0
site_1466	0.488014	0.309983	0.0081142	0.19389	0	0	0
site_1467	0.851579	0.0733772	0	0.00811722	0	0.0648858	0.00204064
site_1468	0.876133	0.115661	0	0.00820625	0	0	0
site_1469	0.464152	0.389379	0.018981	0.113604	0.0138826	0	0
site_1470	0.976257	0.00965367	0	0.0108927	0	0.0031966	0
site_1471	0.15337	0.0785299	0.759617	0.008483	0	0	0
site_1472	0.957521	0.00081554	0	0.0416636	0	0	0
site_1473	0.354849	0.0032428	0.641368	0.000540476	0	0	0
site_1474	0.682204	0.101526	0.215199	0.00107058	0	0	0
site_1475	0.165144	0.110053	0	0.62384	0.000266089	0.100697	0
site_1476	0.262894	0.477686	0.24992	0.00217175	0	0	0.00732937
site_1477	0.754312	0.239505	0	0.00618302	0	0	0
site_1478	0.0514141	0.89655	0.00816582	0.0293733	0.014497	0	0
site_1479	0.319526	0.214979	0.00105803	0.452571	0.0118663	0	0
site_1480	0.53462	0.137863	0.00319081	0	0	0.295593	0.0287328
site_1481	0.213193	0.47091	0.069104	0.0161874	0	0.230343	0.000261857
site_1482	0.155561	0.467828	0.339946	0.0366645	0	0	0
site_1483	0.837646	0.14166	0.00806793	0.0126265	0	0	0
site_1484	0.632976	0.0796306	0.00190292	0.285219	0.000271847	0	0
site_1485	0	0.120189	0.879811	0	0	0	0
site_1486	0.167161	0.268725	0.436163	0.12741	0.000540632	0	0
site_1487	0.0345827	0.0915462	0.817201	0.0566697	0	0	0
site_1488	0.992041	0.00741754	0	0.000541275	0	0	0
site_1489	0.934347	0.0648421	0	0.000810823	0	0	0
site_1490	0.679546	0.320454	0	0	0	0	0
site_1491	0.450724	0.172855	0.376421	0	0	0	0
site_1492	0.390178	0.358276	0.187744	0.0153032	0	0.0242778	0.0242209
site_1493	0.902228	0.0578169	0.003227	0.0367278	0	0	0
site_1494	0.596382	0.39609	0	0.0075277	0	0	0
site_1495	0.237159	0.612161	0.113998	0.0366823	0	0	0
site_1496	0.296563	0.27913	0.301853	0.122453	0	0	0
site_1497	0.342387	0.605566	0.00214897	0.0498985	0	0	0
site_1498	0.240461	0.209296	0.359904	0.190339	0	0	0
site_1499	0.0269713	0.00576711	0.967143	0	0	0.000118743	0
site_1500	0.202744	0.703784	0.0578143	0.0343732	0	0	0.00128452
site_1501	0.063392	0.364891	0.523438	0.0482792	0	0	0
site_1502	0.94336	0.0537837	0.00022842	0.00262798	0	0	0
site_1503	0.759455	0.217868	0	0.0226773	0	0	0
site_1504	0.488389	0.40739	0	0.0805799	0.0236406	0	0
site_1505	1	0	0	0	0	0	0
site_1506	0.472008	0.421225	0.00457184	0.102195	0	0	0
site_1507	0.265878	0.110021	0.624102	0	0	0	0
site_1508	0.92811	0.0364628	0	0.0354271	0	0	0
site_1509	0.304722	0.140499	0.55451	0.000267816	0	0	0
site_1510	0.879421	0.091011	0	0.0295685	0	0	0
site_1511	0.926747	0.0617094	0	0.0115433	0	0	0
site_1512	0.57865	0.259498	0.032465	0.129387	0	0	0
site_1513	0.734623	0.107082	0.141968	0.0163269	0	0	0
site_1514	0.916232	0.0834954	0	0.000272993	0	0	0
site_1515	0.11921	0.00606405	0.874725	0	0	0	0
site_1516	0.105432	0.253287	0.599925	0.0413563	0	0	0
site_1517	0.237334	0.524527	0.00181969	0	0	0	0.236319
site_1518	0.151775	0.402845	0.442188	0.00319244	0	0	0
site_1519	0.707721	0.22095	0.0713291	0	0	0	0
site_1520	0.181707	0.458979	0.294404	0.0614481	0.00346118	0	0
site_1521	0.469359	0.485667	0	0.0445786	0.000395794	0	0
site_1522	0.843225	0.142897	0	0.0138776	0	0	0
site_1523	0.323539	0.295894	0.000548156	0.374918	0.00510097	0	0
site_1524	0.0177391	0.62518	0.356812	0.000268867	0	0	0
site_1525	0.915433	0.0783398	0	0.00595657	0	0.00027076	0
site_1526	0.55678	0.273412	0.0109896	0.158819	0	0	0
site_1527	0.949774	0.050226	0	0	0	0	0
site_1528	0.856853	0.00533927	0	0.137808	0	0	0
site_1529	0.808674	0.00809409	0.182693	0.000538919	0	0	0
site_1530	0.785399	0.214601	0	0	0	0	0
site_1531	0.963748	0	0	0.0362525	0	0	0
site_1532	0.666915	0.181432	0.0386446	0.0889225	0.0240864	0	0
site_1533	0.0337624	0.0396394	0.77635	0.14998	0.00026784	0	0
site_1534	0.759701	0.23841	0.00188987	0	0	0	0
site_1535	0.976877	0.000264877	0	0.0143391	0	0.00851871	0
site_1536	0.850867	0.0375294	0.111604	0	0	0	0
site_1537	0.919291	0.0229619	0	0.0451927	0	0.0125545	0
site_1538	0.0533619	0.0143128	0.917283	0.0150423	0	0	0
site_1539	0.338943	0.0283244	0	0.632732	0	0	0
site_1540	0.357114	0.076612	0.00190934	0.564365	0	0	0
site_1541	0.231924	0.398797	0.205741	0.163538	0	0	0
site_1542	0.190558	0.251923	0.0178714	0.539647	0	0	0
site_1543	0.93528	0.00764014	0	0.0570795	0	0	0
site_1544	0.176642	0.360478	0.302496	0.160384	0	0	0
site_1545	0.604091	0.164708	0.00712328	0.222867	0.00120988	0	0
site_1546	0.668886	0.0799888	0.237934	0.0131915	0	0	0
site_1547	0.0274341	0.255895	0.716671	0	0	0	0
site_1548	0.230667	0.0401115	0.729222	0	0	0	0
site_1549	0.975239	0.00777301	0	0.016988	0	0	0
site_1550	0.110995	0.47179	0.361974	0.055241	0	0	0
site_1551	0.997824	0.00217644	0	0	0	0	0
site_1552	0.901003	0.040457	0	0.0585403	0	0	0
site_1553	0.898899	0.0550621	0	0.0460385	0	0	0
site_1554	0.382677	0.220899	0.223389	0.173035	0	0	0
site_1555	0.236437	0.566905	0.196658	0	0	0	0
site_1556	0.0813728	0.28195	0.518308	0.11474	0.00362991	0	0
site_1557	0.463849	0.0882238	0.00271459	0.445212	0	0	0
site_1558	0.104083	0.362113	0.454238	0.0795659	0	0	0
site_1559	0.668017	0.0556186	0.235328	0.0410366	0	0	0
site_1560	0.187937	0.174079	0.502925	0.126562	0.00849742	0	0
site_1561	0.359759	0.110736	0.0396199	0.489885	0	0	0
site_1562	0.63404	0.200607	0	0.165353	0	0	0
site_1563	0.915523	0.0555015	0	0.0289755	0	0	0
site_1564	0.165669	0.343326	0.0808992	0.410106	0	0	0
site_1565	0.411884	0.331738	0.255563	0.000814327	0	0	0
site_1566	0.297816	0.542904	0.104841	0.0544387	0	0	0
site_1567	0.458202	0.329186	0.00216248	0.21045	0	0	0
site_1568	0.06563	0.361948	0.381374	0.191049	0	0	0
site_1569	0.308205	0.266648	0.395994	0.0291526	0	0	0
site_1570	0.377613	0.358018	0.114023	0.150074	0.000271465	0	0
site_1571	0.265313	0.204688	0.00752124	0.504212	0.0182662	0	0
site_1572	0.0596128	0.238051	0.666016	0.0352412	0.00107959	0	0
site_1573	0.0116254	0.334574	0.627594	0.0262068	0	0	0
site_1574	0.592537	0.231673	0.00679195	0.159489	0.00950879	0	0
site_1575	0.0837712	0.310623	0.527252	0.0753585	0.00299487	0	0
site_1576	0.534752	0.0127877	0.000272072	0.452188	0	0	0
site_1577	0.600162	0.175401	0.0481165	0.17167	0.00465115	0	0
site_1578	0.152686	0.105457	0.0355889	0.70615	0.000118061	0	0
site_1579	0.224267	0.361888	0.304221	0.109624	0	0	0
site_1580	0.950371	0.016831	0	0.0327976	0	0	0
site_1581	0.318888	0.174645	0.447248	0.0589502	0.000268617	0	0
site_1582	0.520847	0.283933	0.130694	0.0645264	0	0	0
site_1583	0.0621507	0.215683	0.69179	0.017137	0.00610453	0	0.00713526
site_1584	0.191251	0.522671	0.205621	0.0804568	0	0	0
site_1585	0.360114	0.202708	0.358015	0.0791634	0	0	0
site_1586	0.235317	0.0168049	0	0.735314	0.0125641	0	0
site_1587	0.390188	0.178534	0.407014	0.0242645	0	0	0
site_1588	0.34275	0.244425	0.12142	0.291404	0	0	0
site_1589	0.891417	0.106937	0.00137154	0.000274314	0	0	0
site_1590	0.52424	0.139998	0.0060488	0.326184	0.00352921	0	0
site_1591	0.01219	0.180742	0.807068	0	0	0	0
site_1592	0.0829217	0.56061	0.232546	0.123922	0	0	0
site_1593	0.0312312	0.10372	0.850721	0.0143275	0	0	0
site_1594	0.124151	0.800541	0.0433871	0.0319206	0	0	0
site_1595	0.365788	0.101873	0.247485	0.284855	0	0	0
site_1596	0.37977	0.262234	0.0781045	0.279891	0	0	0
site_1597	0.673634	0.208404	0	0.117962	0	0	0
site_1598	0.00119661	0.0855884	0.913215	0	0	0	0
site_1599	0.287577	0.18172	0.0014369	0.529266	0	0	0
site_1600	0.00730687	0.0229638	0.930558	0.0391714	0	0	0
site_1601	0.0825706	0.16568	0.642758	0.108991	0	0	0
site_1602	0.999455	0	0	0.000545438	0	0	0
site_1603	0.796945	0.139248	0.000962968	0.0555418	0.00730232	0	0
site_1604	0.425704	0.50972	0.0256462	0.0389293	0	0	0
site_1605	0.595365	0.193416	0.0202186	0.191001	0	0	0
site_1606	0.0568481	0.69218	0.217567	0.0334047	0	0	0
site_1607	0.100553	0.0124703	0.886976	0	0	0	0
site_1608	0.434641	0.100175	0.346556	0.118628	0	0	0
site_1609	0.00697759	0.0486749	0.922755	0.0215922	0	0	0
site_1610	0.38835	0.138435	0.459005	0.0142099	0	0	0
site_1611	0.0585999	0.0593514	0.858882	0.0231669	0	0	0
site_1612	0.130691	0.4105	0.0918073	0.36342	0.00358141	0	0
site_1613	0.407094	0.252623	0.140404	0.199878	0	0	0
site_1614	0.0243953	0.454167	0.494306	0.0266183	0.000512643	0	0
site_1615	0.267193	0.3978	0.253769	0.0812379	0	0	0
site_1616	0.962964	0.0264819	0	0.0105543	0	0	0
site_1617	0.111009	0.167868	0.586127	0.134996	0	0	0
site_1618	0.380031	0.426637	0.0983067	0.0950246	0	0	0
site_1619	0.165933	0.222917	0.544125	0.0572702	0	0.0094835	0.000270958
site_1620	0.0657935	0.0544186	0.715197	0.164591	0	0	0
site_1621	0.316965	0.267877	0.316994	0.0981647	0	0	0
site_1622	0.0353747	0.0654841	0.89479	0.00435151	0	0	0
site_1623	0.262371	0.284245	0	0.44472	0	0.000822632	0.00784073
site_1624	0.201114	0.0338122	0.745906	0.019168	0	0	0
site_1625	0	0.0209531	0.944707	0.0343401	0	0	0
site_1626	0.564786	0.319795	0.0959992	0.01942	0	0	0
site_1627	0.971361	0.00063601	0.0280029	0	0	0	0
site_1628	0.00250886	0.000586965	0.975601	0.0213031	0	0	0
site_1629	0.112932	0.527997	0.26843	0.0906409	0	0	0
site_1630	0.000806642	0.187488	0.792299	0.0194059	0	0	0
site_1631	0.858029	0.120921	0	0.0210495	0	0	0
site_1632	0.215628	0.20512	0.0116733	0.566758	0.000821049	0	0
site_1633	0.790661	0.0514726	0.121305	0.036293	0	0.000268504	0
site_1634	0.322709	0.272538	0.301874	0.10288	0	0	0
site_1635	0.35148	0.268318	0.210878	0.168481	0.000843901	0	0
site_1636	0.288221	0.0901439	0.303814	0.317821	0	0	0
site_1637	0.317761	0.238877	0.325981	0.117381	0	0	0
site_1638	0.939639	0	0	0.0603605	0	0	0
site_1639	0.193868	0.10331	0.600186	0.101559	0.00107641	0	0
site_1640	0.686642	0.290451	0.0215367	0.00137034	0	0	0
site_1641	0.227496	0.0681117	0.690651	0.0137404	0	0	0
site_1642	0.0016157	0.177781	0.775523	0.0450803	0	0	0
site_1643	0.0544956	0.29213	0.484094	0.162526	0.00675448	0	0
site_1644	0.00939622	0.0481322	0.786647	0.150802	0	0.00457827	0.00044499
site_1645	0.112814	0.246013	0.594669	0.046504	0	0	0
site_1646	0.179401	0.0665178	0	0.752725	0.00135636	0	0
site_1647	0.430137	0.221348	0.219861	0.127849	0	0.000806037	0
site_1648	0.358923	0.17207	0	0.468734	0.000272394	0	0
site_1649	0.418161	0.369252	0.184328	0.0282589	0	0	0
site_1650	0.847184	0.0305315	0.112815	0.00946911	0	0	0
site_1651	0.683398	0.00379375	0	0.311995	0.00081293	0	0
site_1652	0.861239	0.0305483	0	0.0675163	0.00623601	0.0344601	0
site_1653	0.194621	0.359354	0.43488	0.011146	0	0	0
site_1654	0.00651008	0.116103	0.875759	0.00162747	0	0	0
site_1655	0.402344	0.22035	0.325934	0.0513721	0	0	0
site_1656	0.454777	0.214527	0.324749	0.0059475	0	0	0
site_1657	0.390984	0.178604	0.428052	0.00236078	0	0	0
site_1658	0.899996	0.095173	0	0.00483057	0	0	0
site_1659	0.558552	0.123562	0.229297	0.0885893	0	0	0
site_1660	0.138154	0.419692	0.0751812	0.366973	0	0	0
site_1661	0.0516099	0.526446	0.355087	0.066857	0	0	0
site_1662	0.151487	0.0925098	0.75525	0.000753342	0	0	0
site_1663	0.913591	0.0449291	0	0.0414801	0	0	0
site_1664	0.188339	0.310023	0.450872	0.0507655	0	0	0
site_1665	0.512529	0.249759	0.00278299	0.227819	0.00710999	0	0
site_1666	0.0173329	0.683692	0.295258	0.00371671	0	0	0
site_1667	0.194961	0.180146	0.4981	0.126793	0	0	0
site_1668	0.77651	0.163386	0.00960675	0.0504966	0	0	0
site_1669	0.157242	0.62403	0.0342897	0.184438	0	0	0
site_1670	0.233494	0.674661	0.0681634	0.0235638	0.000118745	0	0
site_1671	0.176998	0.153059	0.0473011	0.584339	0.00682409	0	0.0314777
site_1672	0.108876	0.128349	0.703707	0.0577141	0.00135419	0	0
site_1673	0.62722	0.191808	0.100552	0.0804213	0	0	0
site_1674	0.302476	0.376427	0.302462	0.0183652	0.00027011	0	0
site_1675	0.341267	0.105675	0.465153	0.0879047	0	0	0
site_1676	0.405197	0.20653	0.204044	0.183954	0.00027468	0	0
site_1677	0.246252	0.176302	0.56412	0.0133266	0	0	0
site_1678	0.245726	0.160687	0.0212493	0.561441	0.00980718	0	0.0010897
site_1679	0.957276	0	0	0.0427238	0	0	0
site_1680	0.00189977	0.0242646	0.966113	0.00772266	0	0	0
site_1681	0.169226	0.21811	0.52129	0.0913736	0	0	0
site_1682	0.683964	0.0948189	0	0.221217	0	0	0
site_1683	0.0102495	0.224041	0.717534	0.0481762	0	0	0
site_1684	0.0308932	0.103894	0.861978	0.0032351	0	0	0
site_1685	0.348664	0.394192	0.183829	0.0733145	0	0	0
site_1686	0.442011	0.325898	0.232091	0	0	0	0
site_1687	0.147766	0.232317	0.619643	0.000273703	0	0	0
site_1688	0.815384	0.111865	0.0183795	0.0543714	0	0	0
site_1689	0.000813735	0.315791	0.589002	0	0.0943928	0	0
site_1690	0.0735665	0.531374	0.332976	0.0620834	0	0	0
site_1691	0.151371	0.129951	0.718678	0	0	0	0
site_1692	0.0310618	0.052813	0.915989	0.000136187	0	0	0
site_1693	0.941796	0.00394256	0	0.054261	0	0	0
site_1694	0.883254	0.0600424	0	0.0567037	0	0	0
site_1695	0.436927	0.0921657	0.421675	0.0492325	0	0	0
site_1696	0.64388	0.02418	0	0.33194	0	0	0
site_1697	0.0258862	0.000816805	0.973297	0	0	0	0
site_1698	0.54871	0.0604235	0.0445306	0.339362	0.00697442	0	0
site_1699	0.0376068	0.536421	0.423267	0	0	0	0.00270559
site_1700	0.109832	0.203582	0.678137	0.00844914	0	0	0
site_1701	0.0733229	0.227211	0.67999	0.0194756	0	0	0
site_1702	0.456295	0.17588	0.144881	0.222944	0	0	0
site_1703	0.334892	0.10002	0.00189186	0.562115	0.000270259	0.00081081	0
site_1704	0.313075	0.0935988	0	0.572476	0.0208497	0	0
site_1705	0.462273	0.242503	0	0.284519	0	0.00962694	0.00107757
site_1706	1	0	0	0	0	0	0
site_1707	0.30807	0.0594973	0.00027359	0.63216	0	0	0
site_1708	0.419023	0.170621	0.387823	0.0225326	0	0	0
site_1709	0.0117967	0.0163766	0.962962	0.00886524	0	0	0
site_1710	0.0623636	0.0676253	0.860387	0.00962422	0	0	0
site_1711	0.00246488	0.137239	0.771774	0.0876995	0.000821629	0	0
site_1712	0.800268	0.120328	0	0.0794035	0	0	0
site_1713	0.00330016	0.0663908	0.901972	0.0283369	0	0	0
site_1714	0.0485337	0.12729	0.764645	0.0595311	0	0	0
site_1715	0.618999	0.239473	0	0.140704	0.000823048	0	0
site_1716	0.0703143	0.157904	0.697977	0.0738039	0	0	0
site_1717	0.967213	0	0	0.0327867	0	0	0
site_1718	0.311131	0.132317	0.527644	0.0289084	0	0	0
site_1719	0.15166	0.59865	0.127143	0.121461	0.00108613	0	0
site_1720	0.941095	0	0	0.0589051	0	0	0
site_1721	0.0492696	0.0212312	0.928138	0.00136092	0	0	0
site_1722	0.344454	0.619282	0.0230038	0.0132607	0	0	0
site_1723	0.145493	0.168314	0.686193	0	0	0	0
site_1724	0	0.0723189	0.927681	0	0	0	0
site_1725	0.107892	0.25774	0.524739	0.109629	0	0	0
site_1726	0.0957717	0.266155	0.631233	0.00684124	0	0	0
site_1727	0.293705	0.197731	0.49429	0.0142737	0	0	0
site_1728	0.901164	0.0944547	0	0.00438086	0	0	0
site_1729	0.563218	0.436509	0.000273443	0	0	0	0
site_1730	0.892067	0.0980519	0.00251671	0.00736488	0	0	0
site_1731	0.546278	0.311251	0.093179	0.0492925	0	0	0
site_1732	0.982043	0.00135509	0	0.0166019	0	0	0
site_1733	0.604541	0.159841	0.0384677	0.19309	0.00405996	0	0
site_1734	0.303618	0.473472	0.22101	0.00190031	0	0	0
site_1735	0.00959689	0.175129	0.768729	0.0465442	0	0	0
site_1736	0.35814	0.25774	0.242568	0.14099	0.000562188	0	0
site_1737	0.0704036	0.0933309	0.74202	0.0929426	0.00130268	0	0
site_1738	0.176062	0.081824	0.699021	0.0430931	0	0	0
site_1739	0.71094	0.20723	0.0330032	0.0488272	0	0	0
site_1740	0.41777	0.346765	0.126662	0.108804	0	0	0
site_1741	0.40591	0.269774	0.00953972	0.314496	0.000279707	0	0
site_1742	0.363659	0.0942513	0.0197914	0.388902	0	0.132564	0.000832002
site_1743	0.29312	0.0816124	0.027642	0.590387	0.00723821	0	0
site_1744	0.30701	0.22753	0.0715865	0.2852	0.000281837	0.0881563	0.0202349
site_1745	0.980927	0	0	0.0190734	0	0	0
site_1746	0.950835	0.0128966	0	0.035423	0.00084554	0	0
site_1747	0.37151	0.267226	0.26607	0.0949102	0.000283978	0	0
site_1748	0.214793	0.228552	0.0831697	0.440057	0.00056402	0.0328639	0
site_1749	0.370394	0.0933965	0.0841549	0.451771	0.000283943	0	0
site_1750	0.432919	0.114414	0.0194523	0.433215	0	0	0
site_1751	0.58892	0.0796115	0.0226659	0.167602	0.0585376	0.082663	0
site_1752	0.200583	0.112436	0.62628	0.0607011	0	0	0
site_1753	0.494519	0.175341	0.104059	0.149422	1.25132e-06	0.0766591	0
site_1754	0.236462	0.266655	0.122543	0.268956	0.105385	0	0
site_1755	0.167097	0.120941	0.00954086	0.654747	0.0473928	0.000281686	0
site_1756	0.403567	0.212647	0.319511	0.0642747	0	0	0
site_1757	0.24267	0.452127	0.108038	0.196602	0.000563473	0	0
site_1758	0.125735	0.0509519	4.30972e-05	0.822988	0.000281913	0	0
site_1759	0.440554	0.330251	0.171565	0.0576307	0	0	0
site_1760	0.282178	0.476918	0.178621	0.062283	0	0	0
site_1761	0.181446	0.397504	0.395536	0.0255147	0	0	0
site_1762	0.401754	0.255548	0.0707845	0.271913	0	0	0
site_1763	0.434203	0.0175457	0	0.548252	0	0	0
site_1764	0.51576	0.167976	0.0157639	0.299936	0.000562997	0	0
site_1765	0.419515	0.423368	0.0866543	0.0693274	0.000851312	0.000283772	0
site_1766	0.966915	0	0	0.0330852	0	0	0
site_1767	0.164144	0.600376	0.18327	0.0450222	0	0	0.00718758
site_1768	0.221163	0.2715	0.415009	0.0921197	0.000208504	0	0
site_1769	0.229537	0.171156	0.411233	0.17191	0.0161635	0	0
site_1770	0.5578	0.127533	0.0971874	0.216628	0.000851197	0	0
site_1771	0.278938	0.13064	0.534374	0.0560473	0	0	0
site_1772	0.226434	0.75439	0.0117203	0.00745576	0	0	0
site_1773	0.176915	0.190626	0.528068	0.104391	0	0	0
site_1774	0.288256	0.147265	0.29756	0.266075	0.000843913	0	0
site_1775	0.468975	0.335991	0.009941	0.127111	0	0.057982	0
site_1776	0.291749	0.0118865	0.000281347	0.694676	0.00140674	0	0
site_1777	0.332962	0.431565	0.218952	0.016521	0	0	0
site_1778	0.250872	0.184905	0	0.559685	0.00450804	0	3.01123e-05
site_1779	0.683476	0.13731	0.152974	0.0262392	0	0	0
site_1780	0.280316	0.19653	0.0243012	0.492668	0.00618438	0	0
site_1781	0.230816	0.073139	0.520393	0.175652	0	0	0
site_1782	0.17382	0.131793	0.541996	0.152391	0	0	0
site_1783	0.0964781	0.107248	0.755705	0.0405683	0	0	0
site_1784	0.924647	0.0292842	0.0143329	0	0	0.0317358	0
site_1785	0.621401	0.134543	0.126647	0.0166002	0	0.100808	0
site_1786	0.46752	0.376088	0.141974	0.0144174	0	0	0
site_1787	0.986393	0.0136071	0	0	0	0	0
site_1788	0.532989	0.159182	0.0178641	0.230635	0	0.0593302	0
site_1789	0.871961	0.0401587	0.00897968	0.0789002	0	0	0
site_1790	0.248873	0.215832	0.524602	0.0106927	0	0	0
site_1791	0.613396	0.297377	0.0861229	0.00310471	0	0	0
site_1792	0.272104	0.46458	0.107935	0.1517	0.00368043	0	0
site_1793	0.584654	0.326713	0.0771083	0.0115248	0	0	0
site_1794	0.239134	0.116433	0.494979	0.07064	0.0788134	0	0
site_1795	0.391515	0.229799	0.241845	0.130845	0.00513977	0.000856676	0
site_1796	0.470633	0.00365791	0	0.525709	0	0	0
site_1797	0.420344	0.205497	0.361798	0.0123614	0	0	0
site_1798	0.497137	0.348176	0.0993631	0.0553238	0	0	0
site_1799	0.900288	8.87256e-05	0	0.099623	0	0	0
site_1800	0.465336	0.00477587	0	0.480709	0.00252935	0.0466495	0
site_1801	0.656731	0.183748	0.00477677	0.154744	0	0	0
site_1802	0.472636	0.292741	0.185812	0.0488105	0	0	0
site_1803	0.72963	0.22635	0.00717221	0.0368479	0	0	0
site_1804	0.80486	0.0619072	0.0804476	0.000285966	0.00142983	0.0510698	0
site_1805	0.00586367	0.103418	0.873533	0.0171851	0	0	0
site_1806	0.728816	0.0725741	0	0.0959695	0.102641	0	0
site_1807	0.251698	0	0	0.747734	0.000567733	0	0
site_1808	0.299795	0.0292241	0.00369775	0.624749	0.00958652	0.0329479	0
site_1809	0.629788	0.268468	0.0392161	0.0558089	0	0.006719	0
site_1810	0.10625	0.0117544	0.0156929	0.866023	0.000280215	0	0
site_1811	0.515163	0.0285404	0.0169901	0.426004	0.000568229	0.0127337	0
site_1812	0.29495	0.551329	0.0553112	0.0938904	0.00451908	0	0
site_1813	0.420025	0.45918	0.098576	0.0222191	0	0	0
site_1814	0.0496354	0.0711111	0.809267	0.0699869	0	0	0
site_1815	0.433115	0.238088	0.239594	0.0892036	0	0	0
site_1816	0.0389825	0.00316841	0	0.957849	0	0	0
site_1817	0.474137	0.172147	0.0720951	0.281621	0	0	0
site_1818	0.651852	0.0459271	0	0.302221	0	0	0
site_1819	0.203429	0.0482496	0.722456	0.0258655	0	0	0
site_1820	0.398216	0.327782	0.221508	0.052494	0	0	0
site_1821	0.384109	0.395499	0.151077	0.0690318	0	0.000283953	0
site_1822	0.725388	0.0430696	0.204709	0.0268334	0	0	0
site_1823	0.374141	0.18786	0.230034	0.207965	0	0	0
site_1824	0.694477	0.151988	0.0595893	0.000279757	0.0936658	0	0
site_1825	0.999717	0.000282576	0	0	0	0	0
site_1826	0.422161	0.434936	0.0930052	0.0498982	0	0	0
site_1827	1	0	0	0	0	0	0
site_1828	0.419575	0.302189	0.00372093	0.269725	0.0047897	0	0
site_1829	0.784886	0.0899887	0.0286802	0.0499112	0	0.0465343	0
site_1830	0.456836	0.151086	0.00657888	0.385499	0	0	0
site_1831	0.42473	0.22762	0.327854	0.0197961	0	0	0
site_1832	0.640308	0.118686	0.210022	0.0103463	0	0.0206377	0
site_1833	0.297662	0.128198	0.000564996	0.573293	0.000282489	0	0
site_1834	0.396845	0.210083	0.0369591	0.256097	0.00997026	0.0900455	0
site_1835	0.40071	0.117197	0.196986	0.284827	0.000280088	0	0
site_1836	0.639196	0.105806	0.116072	0.138926	0	0	0
site_1837	0.505346	0.295705	0.0200105	0.178938	0	0	0
site_1838	0.728193	0.048808	0.0165199	0.20392	0.000853068	0.00170614	0
site_1839	0.430537	0.125732	0.0953077	0.348423	0	0	0
site_1840	0.878751	0.0934492	0.00255827	0.0206926	0.0045488	0	0
site_1841	0.410455	0.0783555	0.184343	0.326846	0	0	0
site_1842	0.402026	0.333116	4.07118e-05	0.264532	0.000285806	0	0
site_1843	0.217968	0.0234008	0.00169201	0.756939	0	0	0
site_1844	0.728824	0.190858	0.0738723	0.00644605	0	0	0
site_1845	0.406894	0.300379	0.200071	0.0815905	0.0110654	0	0
site_1846	0.0487616	0.0345322	0.871368	0.0453379	0	0	0
site_1847	0.556026	0.183943	0	0.260031	0	0	0
site_1848	0.543603	0.186637	0.0785583	0.168977	0	0.0222248	0
site_1849	0.228495	0.332263	0.438674	0.000567442	0	0	0
site_1850	0.877813	0.0201485	0	0.102038	0	0	0
site_1851	0.6494	0.177334	0	0.173266	0	0	0
site_1852	0.358017	0.0806915	0.00314189	0.513564	0.00482334	0.0397622	0
site_1853	0.354937	0.0411022	0.189307	0.412119	0.00253485	0	0
site_1854	0.341864	0.486693	0.0483858	0.102638	0	0.0204192	0
site_1855	0.118911	0.0660733	0.144375	0.635409	0.0352318	0	0
site_1856	0.537752	0.381886	0.00730375	0.0730588	0	0	0
site_1857	0.940011	0.0294275	0	0.0305617	0	0	0
site_1858	0.380606	0.356454	0.130062	0.132878	0	0	0
site_1859	0.0588824	0.217198	0.674181	0.0497387	0	0	0
site_1860	0.435077	0.0147807	0	0.54958	0.000562552	0	0
site_1861	0.270239	0.12693	0.227516	0.375034	0.000281337	0	0
site_1862	0.403519	0.432748	0.127103	0.0366304	0	0	0
site_1863	0.440742	0.260124	0.0315378	0.156095	0.00199677	0.109505	0
site_1864	0.332813	0.28524	0.32078	0.0611661	0	0	0
site_1865	0.499213	0.354535	0.00775794	0.130776	0.00771738	0	0
site_1866	0.706656	0.0967384	0.00386198	0.192744	0	0	0
site_1867	0.270373	0.305933	0.34978	0.00394323	0	0.0699712	0
site_1868	0.994696	0.00530388	0	0	0	0	0
site_1869	0.46755	0.156531	0.00433731	0.0656781	0	0.305904	0
site_1870	0.075845	0.0634349	0.834688	0.0260324	0	0	0
site_1871	0.333055	0.0277009	7.23692e-05	0.639171	0	0	0
site_1872	0.257193	0.0286063	0	0.713921	0.000279604	0	0
site_1873	0.457314	0.290319	0.160675	0.0916919	0	0	0
site_1874	0.602298	0.178905	0.218514	0.000283269	0	0	0
site_1875	0.0738414	0.0602816	0.799547	0.0663304	0	0	0
site_1876	0.444389	0.069513	0.00449897	0.479912	0.00168719	0	0
site_1877	0.29378	0.498113	0.201496	0.00661145	0	0	0
site_1878	0.631997	0.101694	0.000281795	0.263209	0	0.00281799	0
site_1879	0.537931	0.0777035	0.00639845	0.377967	0	0	0
site_1880	0.480755	0.117248	0.0134182	0.370819	0	0.0177608	0
site_1881	0.290309	0.00661543	0.000281619	0.702539	0.000254131	0	0
site_1882	0.376434	0.340336	0.258707	0.0245227	0	0	0
site_1883	0.619346	0.218021	0.00140939	0.161224	0	0	0
site_1884	0.686808	0.13878	0.0412272	0.131769	0.00141685	0	0
site_1885	0.597697	0.199993	0.0694151	0.0330909	0	0.0998042	0
site_1886	0.261452	0.529057	0.116546	0.0929454	0	0	0
site_1887	0.425541	0.0757168	0.00454273	0.483603	0.0103116	0.000283926	0
site_1888	0.391531	0.439533	0.0432879	0.125366	0.000282012	0	0
site_1889	0.175493	0.00660571	0.738412	0.0679222	0.011567	0	0
site_1890	0.565159	0.221675	0.10625	0.0970624	0	0.00985339	0
site_1891	0.39598	0.0589505	0.466217	0.0788529	0	0	0
site_1892	0.540607	0.136582	0.0212458	0.298249	0.000283393	0.0030318	0
site_1893	0.22883	0.464195	0.270927	0.0360483	0	0	0
site_1894	0.243585	0.101087	0.0772982	0.57803	0	0	0
site_1895	0.324128	0.255058	0.168741	0.252073	0	0	0
site_1896	0.407239	0.118664	0.0545806	0.419233	0.000283729	0	0
site_1897	0.133683	0.0665364	0.0567553	0.738773	0.00425297	0	0
site_1898	0.439598	0.235733	0.293641	0.0310276	0	0	0
site_1899	0.427837	0.416849	0.0846749	0.0695073	0.00113135	0	0
site_1900	0.61841	0.210515	0.0605782	0.000285518	0	0.110211	0
site_1901	0.627461	0.285311	0.0177142	0.0695144	0	0	0
site_1902	0.773269	0.181191	0.011905	0.0336354	0	0	0
site_1903	0.385034	0.282885	0.172641	0.158312	0.00112783	0	0
site_1904	0.883561	0.0405439	0.0255985	0.0502961	0	0	0
site_1905	0.498341	0.421485	0.00338259	0.0767917	0	0	0
site_1906	0.226702	0.504504	0.23713	0.0316646	0	0	0
site_1907	0.0234404	0.163833	0.811208	0.00151895	0	0	0
site_1908	0.232616	0.096723	0.659456	0.0112053	0	0	0
site_1909	0.201413	0.569228	0.154137	0.0752216	0	0	0
site_1910	0.252903	0.112889	0.00816948	0.624911	0.00112701	0	0
site_1911	0.56048	0.312411	0.0707733	0.056335	0	0	0
site_1912	0.443793	0.361646	0.108219	0.0863417	0	0	0
site_1913	0.432196	0.0614051	0.405462	0.100936	0	0	0
site_1914	0.578139	0.337388	0.00329597	0.0811765	0	0	0
site_1915	0.478351	0.392993	0.000991778	0.127382	0.000281667	0	0
site_1916	0.853542	0.0613664	0	0.0727883	0.00596738	0.0063363	0
site_1917	0.421478	0.306138	0.169704	0.09703	0.00565013	0	0
site_1918	0.551213	0.120803	0.0143805	0.310784	0.00281968	0	0
site_1919	0.330673	0.215015	0.00108839	0.449852	0.000842808	0.00252836	0
site_1920	0.646536	0.24052	0.000843289	0.112101	0	0	0
site_1921	0.463526	0.29087	0.103561	0.142044	0	0	0
site_1922	0.377998	0.437268	0.173645	0.0110893	0	0	0
site_1923	0.435996	0.463423	0.00631203	0.0942681	0	0	0
site_1924	0.426048	0.217468	0.116183	0.22541	0.0143197	0.000570885	0
site_1925	0.750878	0.224588	0.0189759	0.00230323	0	0.0032545	0
site_1926	0.910248	0.0692798	0	0.0204724	0	0	0
site_1927	0.652008	0.222778	0.0508663	0.0743481	0	0	0
site_1928	0.0218484	0.165328	0.794744	0.0179636	0.000116115	0	0
site_1929	0.422823	0.389082	0.14696	0.0411356	0	0	0
site_1930	0.250003	0.366565	0.260318	0.122829	0.000285305	0	0
site_1931	0.0536827	0.000280656	0.886397	0.0596392	0	0	0
site_1932	0.719022	0.0550602	0	0.225917	0	0	0
site_1933	0.643266	0.149746	0.122712	0.00974583	0	0.0745304	0
site_1934	0.41672	0.369196	0.102318	0.111766	0	0	0
site_1935	0.442059	0.295747	0.214202	0.0479913	0	0	0
site_1936	0.772282	0.223612	0	0.00410613	0	0	0
site_1937	0.321841	0.320235	0.342637	0.0152876	0	0	0
site_1938	0.393899	0.0274815	0	0.57862	0	0	0
site_1939	0.59457	0.195238	0.131746	0.0784462	0	0	0
site_1940	0.306804	0.00134033	0	0.691856	0	0	0
site_1941	0.539458	0.27194	0.0682066	0.120396	0	0	0
site_1942	0.715756	0.232706	0.0515387	0	0	0	0
site_1943	0.378696	0.00134327	0	0.619714	0	0.000247034	0
site_1944	0.559354	0.223128	0.217518	0	0	0	0
site_1945	0.509069	0.00646728	0	0.483656	0.000808432	0	0
site_1946	0.558451	0.147078	0.00607799	0.138899	0.00108603	0.147049	0.00135757
site_1947	0.14008	0.0857617	0	0.774158	0	0	0
site_1948	0.36586	0.462252	0.0703476	0.10154	0	0	0
site_1949	0.926511	0.0241617	0	0.0493274	0	0	0
site_1950	0.369721	0.109452	0	0.520827	0	0	0
site_1951	0.398064	0.0322631	0.536677	0.0329962	0	0	0
site_1952	0.361576	0.0616467	0.0109325	0.558742	0	0	0.00710305
site_1953	0.818756	0.00337656	0	0.175143	0.00272384	0	0
site_1954	0.940363	0.0110594	0	0.0485771	0	0	0
site_1955	0.114847	0.771645	0.110449	0.00147706	0	0.000263877	0.00131934
site_1956	0.955502	0	0	0.0444976	0	0	0
site_1957	0.456533	0.182527	0.0064605	0.35448	0	0	0
site_1958	0.931577	0.00899145	0	0.0591601	0.000271366	0	0
site_1959	0.0833813	0.0133581	0.898222	0.00503904	0	0	0
site_1960	0.938324	0.000540056	0	0.0611362	0	0	0
site_1961	0.753603	0.0292547	0.00619669	0.181183	0.0297624	0	0
site_1962	0.858525	0.0416319	0.0995787	0	0	0	0.000264916
site_1963	0.806608	0.189383	0	0.00400898	0	0	0
site_1964	0.0710434	0.252423	0.652191	0.024342	0	0	0
site_1965	0.333586	0.445505	0.180921	0.0347834	0	0.00520422	0
site_1966	0.0671253	0.271329	0.198344	0.461045	0.00215732	0	0
site_1967	0.0833468	0.0374035	0.000862462	0.877613	0.000774067	0	0
site_1968	0.65351	0.303525	0	0.0231049	0	0	0.0198603
site_1969	0.122734	0.00454897	0	0.872713	3.90119e-06	0	0
site_1970	0.452412	0.458137	0.0590866	0.0300972	0	0	0.000267357
site_1971	0.17036	0.75251	0.0630433	0.0140862	0	0	0
site_1972	0.310671	0.180201	0	0.146906	0.00534985	0.342615	0.0142569
site_1973	0.608821	0.299361	0.0203902	0.071427	0	0	0
site_1974	0.527942	0.1972	0.216972	0.057886	0	0	0
site_1975	0.518271	0.346586	0.0882994	0.0468436	0	0	0
site_1976	0	0.0730914	0.926909	0	0	0	0
site_1977	0.86727	0.108312	0	0.0244176	0	0	0
site_1978	0.23202	0.031143	0.00273754	0.7341	0	0	0
site_1979	0.0687357	0.0317266	0.106298	0.788059	0.00518025	0	0
site_1980	0.3516	0.257508	0.309188	0.0817029	0	0	0
site_1981	0.0274894	0.380663	0.591848	0	0	0	0
site_1982	0.468405	0.375541	0.147103	0.00895103	0	0	0
site_1983	0.383707	0.39514	0.220884	0.000269289	0	0	0
site_1984	0.54926	0.263233	0.000268886	0.187238	0	0	0
site_1985	0.393843	0.20267	0.0249513	0.35628	0.000798389	0	0.0214573
site_1986	0.127311	0.725953	0.0846488	0.0620876	0	0	0
site_1987	0.140086	0.0353778	0	0.823202	0.00133369	0	0
site_1988	0.53487	0.289167	0	0.175963	0	0	0
site_1989	0.872849	0.127151	0	0	0	0	0
site_1990	0.734614	0.198732	0.00870662	0.0579477	0	0	0
site_1991	0.192661	0.404688	0.155125	0.240734	0.00679232	0	0
site_1992	0.0489541	0.426133	0.524913	0	0	0	0
site_1993	0.862808	0.0533685	0.00290001	0.0809235	0	0	0
site_1994	0.669861	0.283547	0.0159224	0	0	0	0.0306697
site_1995	0.0881468	0.303284	0.515233	0.0930704	0	0.000265352	0
site_1996	0.749299	0.227905	0.0067632	0.0160334	0	0	0
site_1997	0.857788	0.0334209	0	0.107689	0.00110256	0	0
site_1998	0.070072	0.621614	0.266186	0.0421275	0	0	0
site_1999	0.395407	0.583938	0.0195807	0.00107383	0	0	0
site_2000	0.142372	0.0974986	0.732922	0.0272073	0	0	0
site_2001	0.76663	0.163772	0.0188292	0.0507697	0	0	0
site_2002	0.598076	0.183622	0	0.218302	0	0	0
site_2003	0.901337	0.0970483	0	0.00161478	0	0	0
site_2004	0.467042	0.0936311	0.00486928	0.41184	0.0226177	0	0
site_2005	0.291151	0.22446	0.045083	0.439306	0	0	0
site_2006	0.862535	0.0163749	0.120826	0.000264251	0	0	0
site_2007	0.883176	0.0926496	0.000267339	0.0239068	0	0	0
site_2008	0.139744	0.108488	0.751768	0	0	0	0
site_2009	0.00785102	0.0191905	0.913942	0.0590167	0	0	0
site_2010	0.499943	0.45408	0.0073	0.0292136	0	0.00892235	0.000540748
site_2011	1	0	0	0	0	0	0
site_2012	0.37891	0.0924843	0.0227087	0.49796	0.00793716	0	0
site_2013	0.724961	0.214323	0.00410156	0.0566152	0	0	0
site_2014	0.837464	0.0113119	0	0.142819	0	0.00840437	0
site_2015	0.271436	0.229548	0.449217	0.0497983	0	0	0
site_2016	0.46428	0.0503386	0.00376834	0.480536	0.00107667	0	0
site_2017	0.611357	0.103461	0	0.268793	0	0.0163891	0
site_2018	0.30595	0.0218495	0.00324231	0.0213962	0.0440339	0.603528	0
site_2019	0.468482	0.155666	0	0.372357	0.00349448	0	0
site_2020	0.982262	0.0162501	0	0.00148779	0	0	0
site_2021	0.157913	0.771377	0.0618683	0.00884206	0	0	0
site_2022	0.213844	0.77924	0.000264012	0.00665245	0	0	0
site_2023	0.788434	0.209267	0.00229875	0	0	0	0
site_2024	0.417857	0.155081	0.374065	0.0529975	0	0	0
site_2025	0.538185	0.416909	0	0.0449062	0	0	0
site_2026	0.335615	0.602458	0	0.0215894	0	0	0.0403371
site_2027	0.394273	0.0377568	0	0.567971	0	0	0
site_2028	0.119223	0.446766	0.137061	0.295337	0.00161344	0	0
site_2029	0.372472	0.210026	0	0.417502	0	0	0
site_2030	0.15314	0.00620556	0	0.837913	0.00274109	0	0
site_2031	0.00416833	0.0251659	0.970666	0	0	0	0
site_2032	0.111472	0.167779	0.626947	0.0938016	0	0	0
site_2033	0.328216	0.656204	0.0155808	0	0	0	0
site_2034	0.167356	0.414773	0.406927	0.0101166	0.000826207	0	0
site_2035	0.0852486	0.0959225	0.0773947	0.741165	0.000268881	0	0
site_2036	0.326336	0.488086	0.0301095	0.155469	0	0	0
site_2037	0.474501	0.450902	0.0745973	0	0	0	0
site_2038	0.80695	0.179587	0	0.0134636	0	0	0
site_2039	0.632358	0.278534	0.0249432	0.0641643	0	0	0
site_2040	0.414137	0.317523	0.0367758	0.230469	0.00109521	0	0
site_2041	0.763322	0.176975	0.0393486	0.0203552	0	0	0
site_2042	0.478296	0.48479	0	0.0369144	0	0	0
site_2043	0.0289757	0.408371	0.547094	0.0155593	0	0	0
site_2044	0.538396	0.292683	0	0.168921	0	0	0
site_2045	0.312359	0.0725108	0	0.614631	0.000499434	0	0
site_2046	0.413135	0.28882	0.0324023	0.0566791	0.0535725	0.0760893	0.0793019
site_2047	0.314428	0.388988	0.0781909	0.218393	0	0	0
site_2048	0.563792	0.380866	0.0491037	0.0062386	0	0	0
site_2049	0.0394956	0.0744287	0.885279	0.000797144	0	0	0
site_2050	0.0143543	0.170734	0.792139	0.0227728	0	0	0
site_2051	0.25273	0.425368	0.225247	0.0966554	0	0	0
site_2052	0.100336	0.0340242	0.00794122	0.857699	0	0	0
site_2053	0.535597	0.393047	0.0243386	0.0451323	0	0	0.00188533
site_2054	0.449862	0.210112	0.0986476	0.237939	0.00343943	0	0
site_2055	0.0153788	0.233035	0.616107	0.134427	0.0010513	0	0
site_2056	0.415987	0.542706	0	0.0155986	0	0.0100128	0.0156959
site_2057	0.329191	0.00659534	0.0388215	0.625123	0.000269158	0	0
site_2058	0.48114	0.328182	0.174189	0.0164892	0	0	0
site_2059	0.19453	0.0365744	0.00768256	0.761213	0	0	0
site_2060	0.00185543	0.294016	0.703599	0.000530128	0	0	0
site_2061	0.672278	0.127973	0	0.19975	0	0	0
site_2062	0.813735	0.113993	0	0.0722723	0	0	0
site_2063	0.571507	0.0526756	0	0.375817	0	0	0
site_2064	0.343998	0.00348804	0	0.652514	0	0	0
site_2065	0.375912	0.103262	0.141428	0.376871	0	0.00252684	0
site_2066	0.908702	0.0762652	0.0150332	0	0	0	0
site_2067	0.437557	0.305514	0.00107938	0.00890425	0	0	0.246945
site_2068	0.170997	0.308161	0.520841	0	0	0	0
site_2069	0.0175582	0.185635	0.796276	0.00053058	0	0	0
site_2070	0.909577	0.0482234	0	0.0421993	0	0	0
site_2071	0.989824	0.00482053	0	0.00535593	0	0	0
site_2072	0.0102267	0.387841	0.53993	0.0620032	0	0	0
site_2073	0.592285	0.152423	0.0278676	0.227425	0	0	0
site_2074	0.204225	0.29795	0.476065	0.0217604	0	0	0
site_2075	0.722543	0.0562725	0.171882	0.0493028	0	0	0
site_2076	0.637829	0.288874	0.0612393	0.0120578	0	0	0
site_2077	0.0728682	0.166368	0.0213125	0.739188	0.000264066	0	0
site_2078	0.650015	0.313531	0.000269743	0.0361836	0	0	0
site_2079	0	0.0700001	0.93	0	0	0	0
site_2080	0.116701	0.377982	0.020613	0.445676	0.0390279	0	0
site_2081	0.942038	0.00748977	0	0.0504727	0	0	0
site_2082	0.456882	0.0809838	0.0218126	0.440322	0	0	0
site_2083	0.341354	0.0150435	0	0.643334	0.000268627	0	0
site_2084	0.506291	0.0437257	0	0.449983	0	0	0
site_2085	0.176879	0.21305	0.55291	0.0568897	0.000271295	0	0
site_2086	0.444289	0.35512	0.136253	0.0643371	0	0	0
site_2087	0.819234	0.179143	0	0	0	0	0.0016223
site_2088	0.354125	0.00510627	0	0.639156	0.00161252	0	0
site_2089	0.182552	0.214473	0.213274	0.389701	0	0	0
site_2090	0.402305	0.196908	0.0123903	0.386551	0.00184536	0	0
site_2091	0.0797483	0.531059	0.389193	0	0	0	0
site_2092	0.624588	0.21931	0.132767	0.00159992	0	0.0209357	0.000799941
site_2093	0.689238	0.29343	0.0173326	0	0	0	0
site_2094	0.998085	0.00109418	0	0.000820658	0	0	0
site_2095	0.245743	0.0930301	0.452445	0.208783	0	0	0
site_2096	0.280294	0.321261	0.00499777	0.393448	0	0	0
site_2097	0.818668	0.0357633	0	0.145569	0	0	0
site_2098	0.332108	0.19437	0.302834	0.170688	0	0	0
site_2099	0.608984	0.0755636	0.265063	0.0503894	0	0	0
site_2100	0.168323	0.801127	0.0305505	0	0	0	0
site_2101	0.66774	0	0	0.33226	0	0	0
site_2102	0.226837	0.247046	0.456772	0.0693451	0	0	0
site_2103	0.30701	0.103222	0	0.589768	0	0	0
site_2104	0.48991	0.444497	0.0459876	0.0196055	0	0	0
site_2105	0.774205	0.000809542	0	0.224985	0	0	0
site_2106	0.0607687	0.423691	0.485068	0.0304727	0	0	0
site_2107	0.163753	0.53219	0.27101	0.0330471	0	0	0
site_2108	0.343568	0.161576	0.494856	0	0	0	0
site_2109	0.287876	0.319114	0.372557	0.0204526	0	0	0
site_2110	0.188374	0.173512	0.584617	0.053496	0	0	0
site_2111	0.883124	0.0605615	0	0.0563146	0	0	0
site_2112	0.325627	0.490706	0.136476	0.0423924	0.00479786	0	0
site_2113	0.0233489	0.484353	0.460719	0.0315786	0	0	0
site_2114	0.348178	0.1554	0.464707	0.031715	0	0	0
site_2115	0.670234	0.327896	0	0.00186972	0	0	0
site_2116	0.435052	0.508607	0.0230403	0.0333009	0	0	0
site_2117	0.854848	0.0937418	0	0.0508756	0.000534482	0	0
site_2118	0.999267	0	0	0.000732692	0	0	0
site_2119	0.513316	0.333124	0.105836	0.047724	0	0	0
site_2120	0.994156	0.00584352	0	0	0	0	0
site_2121	0.300634	0.267187	0.346723	0.0684498	0	0.0121479	0.00485913
site_2122	0.195849	0.656608	0.0931721	0.0543707	0	0	0
site_2123	0.0648459	0.917588	0.00860591	0.00869115	0	0	0.000269058
site_2124	0.0729359	0.478279	0.448786	0	0	0	0
site_2125	0.0317102	0.229544	0.735308	0.00343712	0	0	0
site_2126	0.241825	0.351938	0.255626	0.150611	0	0	0
site_2127	0.852018	0.139459	0	0.00537397	0	0	0.00314876
site_2128	0.706962	0.0201017	0	0.272936	0	0	0
site_2129	0.266637	0.119559	0	0.613804	0	0	0
site_2130	0.807932	0.0117339	0	0.180334	0	0	0
site_2131	0.417801	0.196485	0.349181	0.0365325	0	0	0
site_2132	0.944266	0	0	0.0557344	0	0	0
site_2133	0.0319511	0.0598268	0.876838	0.031384	0	0	0
site_2134	0.616609	0.108129	0	0.275263	0	0	0
site_2135	0.0693316	0.00806963	0.922599	0	0	0	0
site_2136	0.986308	0	0	0.0136916	0	0	0
site_2137	0.565579	0.115077	0.000295809	0.265605	0	0.0534428	0
site_2138	0.843199	0.0978414	0	0.0589595	0	0	0
site_2139	0.632325	0.0744886	0.251813	0.0405797	0.000793324	0	0
site_2140	0.351325	0.259912	0.28319	0.105572	0	0	0
site_2141	0.113214	0.0801617	0.797659	0.0089649	0	0	0
site_2142	0.572818	0.045854	0.119049	0.257243	0.00503533	0	0
site_2143	0.726065	0.184827	0	0.0891086	0	0	0
site_2144	0.428137	0.474851	0.00027429	0.0967378	0	0	0
site_2145	0.546584	0.149147	0.0277157	0.276553	0	0	0
site_2146	0.33227	0.451617	0.0140795	0.202033	0	0	0
site_2147	0.492445	0.198644	0.107363	0.201549	0	0	0
site_2148	0.931987	0.041858	0	0.0015876	0	0.0230864	0.00148088
site_2149	0.921932	0.0157207	0	0.0623476	0	0	0
site_2150	0	0.105942	0.894058	0	0	0	0
site_2151	0.916878	0.0831224	0	0	0	0	0
site_2152	0.964864	0.0131844	0	0.0219516	0	0	0
site_2153	0.185564	0.363811	0.415485	0.0351403	0	0	0
site_2154	0.163493	0.0569337	0.761018	0.0185552	0	0	0
site_2155	0.348679	0.0239136	0.570736	0.0566711	0	0	0
site_2156	0.15379	0.186647	0.645574	0.0139882	0	0	0
site_2157	0.147466	0.189784	0.321561	0.327711	0.0134779	0	0
site_2158	0.0508786	0.108915	0.82123	0.0189761	0	0	0
site_2159	0.779449	0.218132	0	0.00241954	0	0	0
site_2160	0.104259	0.173605	0.0315168	0.68982	0.00079936	0	0
site_2161	0.149105	0.0346894	0.0237913	0.78801	0.00440416	0	0
site_2162	0.859479	0.0995688	0	0.0407986	0	0	0.000153687
site_2163	0.142153	0.476669	0.347963	0.0332144	0	0	0
site_2164	0.438706	0.33266	0.21728	0.0113531	0	0	0
site_2165	0.175566	0.401547	0.422887	0	0	0	0
site_2166	0.636882	0.00188353	0	0.361235	0	0	0
site_2167	0.0079738	0.118057	0.866261	0.0077079	0	0	0
site_2168	0.765378	0.180595	0.0388548	0.0151721	0	0	0
site_2169	0.371598	0.358036	0.26097	0.0093962	0	0	0
site_2170	0.385945	0.562101	0.0342783	0.017676	0	0	0
site_2171	0.0261874	0.482782	0.489442	0.00158941	0	0	0
site_2172	0.454748	0.0244192	0	0.512232	0	0.00833154	0.00026876
site_2173	0.485405	0.319586	0.0400861	0.145125	0.00979735	0	0
site_2174	0.760447	0.169127	0.00081565	0.0696108	0	0	0
site_2175	0.629028	0.25695	0.114023	0	0	0	0
site_2176	0.430894	0.329241	0.190512	0.0411398	0	0.00765757	0.000555669
site_2177	0.496679	0.249174	0.036202	0.217945	0	0	0
site_2178	0.767716	0.204564	0	0.00823674	0	0	0.0194834
site_2179	0.416038	0.275035	0.262851	0.0460763	0	0	0
site_2180	0.336601	0.566707	0.0303156	0.0663767	0	0	0
site_2181	0.0949534	0.400137	0.501961	0.00294796	0	0	0
site_2182	0.789131	0.179908	0	0.0309614	0	0	0
site_2183	0.33781	0.210412	0.198952	0.252017	0	0	0.00080876
site_2184	0.979391	0.0206089	0	0	0	0	0
site_2185	0.496926	0.00744233	0	0.495632	0	0	0
site_2186	0.163633	0.814566	0.0218012	0	0	0	0
site_2187	0.723202	0.0608396	0.0062643	0.209694	0	0	0
site_2188	0.650099	0.0866428	0.000820361	0.26025	0.00218757	0	0
site_2189	0.924089	0.00215933	0	0.0737514	0	0	0
site_2190	0.853609	0.0856285	0.0179603	0.042802	0	0	0
site_2191	0.228166	0.694281	0.0666898	0.010863	0	0	0
site_2192	0.299756	0.685552	0.00497207	0.00971937	0	0	0
site_2193	0.232797	0.3286	0.083087	0.350396	0.000538964	0	0.00458128
site_2194	0.382567	0.458549	0.110057	0	0	0	0.0488267
site_2195	0.410975	0.243753	0.161122	0.183879	0.00027099	0	0
site_2196	0.18434	0.616391	0.0309922	0.168277	0	0	0
site_2197	0.353066	0.0632858	0	0.583648	0	0	0
site_2198	0.168035	0.152499	0.594637	0.0845649	0.000263988	0	0
site_2199	0.460834	0.0281273	0.499729	0.0113099	0	0	0
site_2200	0.960661	6.42513e-07	0	0.0393387	0	0	0
site_2201	0.776834	0.0575479	0.00305985	0.162559	0	0	0
site_2202	0.96144	0.0223339	0	0.0162264	0	0	0
site_2203	0.0423034	0.614059	0.33751	0.0061277	0	0	0
site_2204	0	0.153112	0.846888	0	0	0	0
site_2205	0.134679	0.200654	0.464889	0.108582	0.0911958	0	0
site_2206	0.550265	0.0226357	0	0.4271	0	0	0
site_2207	0.0435827	0.391895	0.0125604	0.503363	0.0485985	0	0
site_2208	0.640972	0.341003	0.00355664	0.0144682	0	0	0
site_2209	0.300102	0.600225	0.0913282	0.00780786	0	0.000536543	0
site_2210	0.459808	0.0723729	0.465564	0.00225508	0	0	0
site_2211	0.10658	0.64579	0.0494921	0.198138	0	0	0
site_2212	0.478901	0.336635	0.159874	0.02459	0	0	0
site_2213	0.278845	0.259758	0.438893	0.0225031	0	0	0
site_2214	0.284971	0.452545	0.217112	0.045372	0	0	0
site_2215	0.347522	0.430701	0.219637	0.00213959	0	0	0
site_2216	0.0691887	0.77767	0.153141	0	0	0	0
site_2217	0.544697	0.36721	0.0404749	0.0476178	0	0	0
site_2218	0.92918	0.0403284	1.57149e-08	0.0304916	0	0	0
site_2219	0.229458	0.214881	0.455491	0.100171	0	0	0
site_2220	0.138903	0.723461	0	0.133086	0	0	0.00454918
site_2221	0.536458	0.190514	0.228258	0.0447698	0	0	0
site_2222	0.535216	0.363532	0.0295028	0.0714778	0.000271199	0	0
site_2223	0.262528	0.133659	0.0032145	0.59417	0.00642876	0	0
site_2224	0.935395	0	0	0.0646052	0	0	0
site_2225	0.466728	0.0894408	0.422922	0.0209093	0	0	0
site_2226	0.658049	0.0994679	0	0.241682	0.000801071	0	0
site_2227	0.671299	0.312432	0	0.0162686	0	0	0
site_2228	0.458691	0.454057	0.0842351	0.000822671	0	0	0.00219365
site_2229	0.0943457	0.0348898	0.0379372	0.832827	0	0	0
site_2230	0.385452	0.56794	0.0466075	0	0	0	0
site_2231	0.433404	0.188619	0	0.377977	0	0	0
site_2232	0.575505	0.349875	0.0692606	0.00535957	0	0	0
site_2233	0.993251	0.00640853	0	0.000340699	0	0	0
site_2234	0.150788	0.262958	0.586253	0	0	0	0
site_2235	0.0817303	0.388633	0.319655	0.209982	0	0	0
site_2236	0.328621	0.126588	0.544791	0	0	0	0
site_2237	0.393181	0.126623	0.0145166	0.453024	0.0126556	0	0
site_2238	0.0670253	0.3548	0.498703	0.0794715	0	0	0
site_2239	0.00160553	0.265451	0.727809	0.00513437	0	0	0
site_2240	0.11079	0.283092	0.606119	0	0	0	0
site_2241	0.300455	0.413702	0.0170104	0.263418	0.005415	0	0
site_2242	0.526372	0.397185	0.0764437	0	0	0	0
site_2243	0.537876	0.321189	0.13906	0.00187492	0	0	0
site_2244	0.474662	0.389129	0.00212883	0.115187	0.0188933	0	0
site_2245	0.25432	0.309302	0.0374171	0.398961	0	0	0
site_2246	0.231305	0.299088	0.457512	0.0120946	0	0	0
site_2247	0.528455	0.349184	0.0214765	0.0995309	0	0.00135432	0
site_2248	0.468318	0.139984	0.385416	0.00628105	0	0	0
site_2249	0.998676	0	0	0.00132372	0	0	0
site_2250	0.344077	0.192741	0.327969	0.135214	0	0	0
site_2251	0.839481	0.104715	0	0.0555327	0.000271732	0	0
site_2252	0.3247	0.15547	0.00216239	0.517401	0.000266403	0	0
site_2253	0.477205	0.497183	0.0212879	0	0	0	0.00432464
site_2254	0.112787	0.0428384	0.844375	0	0	0	0
site_2255	0.831581	0.147232	0.0157276	0.00546001	0	0	0
site_2256	0.728275	0.154556	0.107905	0.00926497	0	0	0
site_2257	0.286938	0.454706	0.153192	0.105164	0	0	0
site_2258	0.44094	0.334861	0.000540818	0.223657	0	0	0
site_2259	0.424994	0.353067	0.0218384	0.196865	0.00161771	0	0.00161772
site_2260	0.595649	0.392424	0.00384822	0.00754018	0	0	0.000538622
site_2261	0.820653	0.121162	0	0.0581845	0	0	0
site_2262	0.237026	0.0197451	0	0.743228	0	0	0
site_2263	0	0.122305	0.862845	0.0148499	0	0	0
site_2264	0.909945	0.0576876	0.0315606	0.000807012	0	0	0
[truncated: 2,130 more rows]
